# Supplementary material for: MondoA regulates gene expression in cholesterol biosynthesis-associated pathways required for zebrafish epiboly
Source: eLife. 2020 Sep 24;9:e57068. doi: 10.7554/eLife.57068 (PMC7515633; doi:10.7554/eLife.57068)
Supplement: Supplementary file 1. — Differentially expressed genes of mondoa-mo vs. mondoa-mis injected embryos, of MZmondoa mutants with or without epiboly phenotype vs. WT embryos and of MZmondoa mutants with epiboly phenotype vs. MZmondoa mutants without epiboly phenotype. [file elife-57068-supp1.xlsx]

## Sheet: Legend
Table S1_1	Results of the differential expression analysis on exon counts using DESeq2 of mondoa-mo vs mondoa-mis injected embryos. Column description: gene ID (Ensembl gene identifier with the exception for mlxipl), gene symbol (Ensembl gene symbol), baseMean (mean of normalized counts for all samples), log2FoldChange (log2 fold change: mondoa-mo vs mondoa-mis injected embryos), lfcSE (standard error: mond…
Table S1_2	Results of the differential expression analysis on exon counts using DESeq2 of MZmondoa mutants with unaffected epiboly vs WT embryos. Column description: gene ID (Ensembl gene identifier with the exception for mlxipl), gene symbol (Ensembl gene symbol), baseMean (mean of normalized counts for all samples), log2FoldChange (log2 fold change: MZmondoa with unaffected epiboly vs WT embryos), lfcSE (…
Table S1_3	Results of the differential expression analysis on exon counts using DESeq2 of MZmondoa mutants with affected epiboly vs WT embryos. Column description: gene ID (Ensembl gene identifier with the exception for mlxipl), gene symbol (Ensembl gene symbol), baseMean (mean of normalized counts for all samples), log2FoldChange (log2 fold change: MZmondoa with affected epiboly vs WT embryos), lfcSE (stan…
Table S1_4	Results of the differential expression analysis on exon counts using DESeq2 of MZmondoa mutants with affected epiboly vs MZmondoa mutants with unaffected epiboly. Column description: gene ID (Ensembl gene identifier with the exception for mlxipl), gene symbol (Ensembl gene symbol), baseMean (mean of normalized counts for all samples), log2FoldChange (log2 fold change: MZmondoa mutants with affect…

## Sheet: S1_1
gene ID	baseMean	log2FoldChange	lfcSE	stat	pvalue	padj	external_gene_name
ENSDARG00000090625	693.404	-3.16212	0.111495	-28.361	6.12812e-177	1.00452e-172	si:ch73-248e21.1
ENSDARG00000099315	404.478	-3.72946	0.153874	-24.2371	9.04287e-130	7.41153e-126	nsdhl
ENSDARG00000078552	1785.68	-1.87449	0.0809176	-23.1655	1.01549e-118	5.54861e-115	grhl3
ENSDARG00000099280	2453.65	-1.44079	0.0640337	-22.5005	4.10062e-112	1.68043e-108	utp20
ENSDARG00000019398	1122.34	-1.58934	0.0806611	-19.7039	1.99757e-86	6.54884e-83	psma6a
ENSDARG00000046030	589.192	-2.12761	0.10837	-19.6329	8.09792e-86	2.21235e-82	zgc:110339
ENSDARG00000069397	2783.21	1.30587	0.0674315	19.3659	1.49806e-83	3.50802e-80	zswim8
ENSDARG00000043963	1660.45	1.58953	0.0846499	18.7777	1.14985e-78	2.35604e-75	si:ch211-241j12.3
ENSDARG00000093704	1520.06	-1.44133	0.0782507	-18.4194	9.18186e-76	1.67232e-72	si:dkeyp-46h3.8
ENSDARG00000021124	6445.22	1.2546	0.0692335	18.1213	2.1623e-73	3.54445e-70	cfl1
ENSDARG00000055743	550.427	-2.3654	0.130635	-18.1069	2.81369e-73	4.19291e-70	ankrd54
ENSDARG00000080010	1289	1.38302	0.0772648	17.8997	1.18491e-71	1.61859e-68	adh5
ENSDARG00000001241	3086.86	-1.01527	0.0594793	-17.0693	2.51094e-65	3.16611e-62	puf60b
ENSDARG00000008807	1043.93	1.55899	0.0913678	17.0628	2.80697e-65	3.28656e-62	bokb
ENSDARG00000102874	1990.85	-1.60308	0.0957871	-16.7358	7.18599e-63	7.85285e-60	immt
ENSDARG00000018907	6897.39	0.901105	0.0543404	16.5826	9.31161e-62	9.53974e-59	kat6a
ENSDARG00000102365	2969.45	-1.03391	0.0625221	-16.5367	1.99616e-61	1.92476e-58	eloa
ENSDARG00000101707	332.94	-2.23296	0.135183	-16.518	2.72221e-61	2.47902e-58	si:ch211-156b7.4
ENSDARG00000099607	603.689	-1.79298	0.109721	-16.3412	5.02748e-60	4.33739e-57	si:ch73-160p18.4
ENSDARG00000012860	1415.49	1.37843	0.0844873	16.3153	7.68836e-60	6.30138e-57	tmprss4b
ENSDARG00000088030	362.528	-2.01795	0.123832	-16.2958	1.05647e-59	8.24647e-57	rpl35a
ENSDARG00000038694	4060.01	-1.12088	0.0688384	-16.2828	1.30804e-59	9.74608e-57	zgc:101744
ENSDARG00000053569	4270.44	1.21234	0.0746413	16.2422	2.53552e-59	1.80705e-56	sox3
ENSDARG00000099054	4278.91	1.20837	0.0747368	16.1684	8.42971e-59	5.75749e-56	BX088596.1
ENSDARG00000027200	536.271	-1.8918	0.117522	-16.0975	2.65646e-58	1.74179e-55	gabarapl2
ENSDARG00000105243	2205.76	-1.17168	0.0732252	-16.0011	1.2563e-57	7.92049e-55	ogt.1
ENSDARG00000102403	2714.77	-1.37473	0.0873446	-15.7392	8.15215e-56	4.94926e-53	cry2
ENSDARG00000062983	2274.27	-1.31972	0.0843711	-15.6419	3.77425e-55	2.20956e-52	fbxo18
ENSDARG00000052816	2996.67	0.956244	0.062575	15.2816	1.01469e-52	5.73545e-50	shmt1
ENSDARG00000042005	959.784	-1.27053	0.0836204	-15.194	3.87502e-52	2.11731e-49	elp3
ENSDARG00000022832	376.266	-1.95427	0.130513	-14.9737	1.09058e-50	5.76669e-48	bnip4
ENSDARG00000038222	285.433	-2.28934	0.153763	-14.8887	3.90076e-50	1.99817e-47	tyw3
ENSDARG00000025576	1588.02	-1.22969	0.0827234	-14.865	5.55755e-50	2.76058e-47	mkln1
ENSDARG00000019008	3172.71	0.894961	0.0607963	14.7207	4.75061e-49	2.29035e-46	erp44
ENSDARG00000030700	2197.7	1.14197	0.0780751	14.6266	1.90022e-48	8.89956e-46	ctps1a
ENSDARG00000101670	928.307	-1.45	0.0992334	-14.612	2.35379e-48	1.07176e-45	kntc1
ENSDARG00000007751	4886.2	-1.0024	0.0690256	-14.5222	8.76777e-48	3.88436e-45	lmnl3
ENSDARG00000042623	1800.81	1.25982	0.0867672	14.5195	9.11561e-48	3.93218e-45	acbd3
ENSDARG00000043555	1220.11	-1.65051	0.113877	-14.4938	1.32555e-47	5.57139e-45	tmem30ab
ENSDARG00000070705	1377.2	1.05001	0.072715	14.4401	2.89324e-47	1.18565e-44	zgc:64022
ENSDARG00000017188	1316.42	1.0961	0.0760163	14.4193	3.9123e-47	1.56416e-44	si:ch211-223m11.2
ENSDARG00000079585	1756.9	-1.18296	0.0821323	-14.4031	4.94839e-47	1.93129e-44	pkn3
ENSDARG00000020893	1083.8	-1.3777	0.0963657	-14.2965	2.30007e-46	8.76808e-44	slc25a55a
ENSDARG00000021252	2567.35	-0.885072	0.0619209	-14.2936	2.39946e-46	8.93907e-44	cct6a
ENSDARG00000099761	1917.47	1.11547	0.0781205	14.2789	2.9625e-46	1.07914e-43	vox
ENSDARG00000094277	751.579	-1.70943	0.121429	-14.0776	5.21299e-45	1.85764e-42	mrpl44
ENSDARG00000005451	1568.49	-1.10047	0.0784069	-14.0354	9.46853e-45	3.3023e-42	gdi2
ENSDARG00000057456	1268.01	1.12511	0.080581	13.9625	2.64101e-44	9.01904e-42	ppp3ccb
ENSDARG00000016548	6715.3	0.783162	0.0564086	13.8837	7.94874e-44	2.6591e-41	eif5b
ENSDARG00000003701	18474.1	0.827835	0.0598733	13.8265	1.76489e-43	5.78603e-41	cldng
ENSDARG00000073997	4336.77	0.80508	0.0582433	13.8227	1.85936e-43	5.9762e-41	srpk1a
ENSDARG00000077473	2640.14	1.18057	0.0857572	13.7664	4.05752e-43	1.27906e-40	mych
ENSDARG00000014770	5048.61	-0.809364	0.059019	-13.7136	8.41593e-43	2.60291e-40	usp4
ENSDARG00000016350	630.438	-1.5366	0.113101	-13.5861	4.84442e-42	1.47055e-39	cap1
ENSDARG00000069763	4585.13	-1.28872	0.0949655	-13.5704	5.99994e-42	1.7882e-39	etv5a
ENSDARG00000068926	3477.74	-1.34738	0.0995083	-13.5404	9.02749e-42	2.64247e-39	si:ch211-137a8.2
ENSDARG00000079312	5854.37	0.818738	0.0607337	13.4808	2.02949e-41	5.83637e-39	kmt2ca
ENSDARG00000101306	327.71	-1.75121	0.130151	-13.4553	2.86716e-41	8.10319e-39	mrpl15
ENSDARG00000043457	4363.22	0.979168	0.0728264	13.4452	3.28343e-41	9.12237e-39	gapdh
ENSDARG00000104233	599.139	-1.54821	0.115554	-13.3981	6.20255e-41	1.69454e-38	dynlrb1
ENSDARG00000016775	1422.67	1.0546	0.0798127	13.2135	7.33473e-40	1.971e-37	aqr
ENSDARG00000021582	420.969	-1.51324	0.115009	-13.1575	1.5401e-39	4.01661e-37	dynlrb1
ENSDARG00000104396	715.238	1.87438	0.142458	13.1574	1.54372e-39	4.01661e-37	trim25
ENSDARG00000015978	375.974	-1.56496	0.119064	-13.1439	1.84548e-39	4.72674e-37	COX5B
ENSDARG00000098968	1020.93	1.09497	0.0838319	13.0615	5.46087e-39	1.37715e-36	BX927204.1
ENSDARG00000021669	15055	0.667458	0.051893	12.8622	7.34558e-38	1.82437e-35	sec61a1
ENSDARG00000099579	6538.31	-0.754004	0.0589814	-12.7837	2.02107e-37	4.94469e-35	aldh18a1
ENSDARG00000068289	479.503	-1.36816	0.107204	-12.7622	2.66489e-37	6.42395e-35	eif3k
ENSDARG00000060917	16239.3	-1.02946	0.0808225	-12.7373	3.66854e-37	8.71517e-35	anln
ENSDARG00000031200	5570.6	0.767538	0.0604022	12.7071	5.39837e-37	1.26414e-34	ppp2r5cb
ENSDARG00000059843	4562.62	0.813617	0.0643186	12.6498	1.12194e-36	2.59026e-34	fam135a
ENSDARG00000062837	5591.18	0.667891	0.0531408	12.5683	3.1533e-36	7.17902e-34	spata13
ENSDARG00000043359	3320.7	-0.821874	0.065613	-12.5261	5.37476e-36	1.20689e-33	rmnd5b
ENSDARG00000053127	3441.42	-0.818699	0.0657965	-12.4429	1.52857e-35	3.386e-33	helb
ENSDARG00000073848	1526.13	0.916961	0.0737331	12.4362	1.6619e-35	3.63225e-33	arhgef7b
ENSDARG00000078083	1693.78	0.95107	0.0767158	12.3973	2.7024e-35	5.82866e-33	armc5
ENSDARG00000013719	995.393	1.03006	0.0832532	12.3726	3.67894e-35	7.83184e-33	gtse1
ENSDARG00000037879	986.265	-1.12305	0.0908008	-12.3683	3.88039e-35	8.15479e-33	lfng
ENSDARG00000023003	449.369	-1.41069	0.11429	-12.3431	5.30757e-35	1.10129e-32	ccdc12
ENSDARG00000057633	2681.83	0.797827	0.0653304	12.2122	2.67602e-34	5.48317e-32	cxcr4a
ENSDARG00000011925	5564.95	-0.798125	0.0654456	-12.1952	3.29526e-34	6.66864e-32	spns1
ENSDARG00000103554	10485.3	-0.769422	0.0631177	-12.1903	3.50209e-34	7.00077e-32	notch1a
ENSDARG00000061472	1260.79	0.955118	0.0783826	12.1853	3.72078e-34	7.34831e-32	gba2
ENSDARG00000045661	252.417	-1.90934	0.159476	-11.9726	4.94646e-33	9.65267e-31	irf7
ENSDARG00000063195	1372.64	0.858304	0.0720504	11.9126	1.01808e-32	1.96333e-30	pxk
ENSDARG00000015290	379.2	-1.57842	0.132559	-11.9072	1.08504e-32	2.06814e-30	sacm1la
ENSDARG00000045132	745.136	-1.21504	0.102587	-11.844	2.31209e-32	4.3563e-30	vdac1
ENSDARG00000044298	1135.12	-1.03901	0.0878166	-11.8316	2.67926e-32	4.99073e-30	phax
ENSDARG00000005230	5232.84	0.717996	0.0607452	11.8198	3.08439e-32	5.68082e-30	ssr2
ENSDARG00000027749	2484.15	-0.748396	0.063519	-11.7822	4.81972e-32	8.77831e-30	hirip3
ENSDARG00000029406	259.21	1.80751	0.153756	11.7558	6.59722e-32	1.18837e-29	h2afx
ENSDARG00000052942	748.496	-1.16479	0.0998718	-11.6628	1.97356e-31	3.51637e-29	aspg
ENSDARG00000031435	1210.37	-0.934187	0.0805962	-11.591	4.58003e-31	8.07268e-29	zgc:56493
ENSDARG00000052658	492.197	1.27864	0.110349	11.5872	4.78462e-31	8.25574e-29	pptc7b
ENSDARG00000092798	3138.43	0.935324	0.0807184	11.5875	4.76864e-31	8.25574e-29	ppib
ENSDARG00000075132	371.487	1.46735	0.128022	11.4617	2.0535e-30	3.50636e-28	fh
ENSDARG00000070688	2589.22	0.980077	0.0855485	11.4564	2.18426e-30	3.69118e-28	ncalda
ENSDARG00000058212	1150.61	-0.89577	0.0782445	-11.4483	2.39667e-30	4.00879e-28	ndnl2
ENSDARG00000015176	1546.35	-1.07337	0.0939719	-11.4223	3.23715e-30	5.35994e-28	ror1
ENSDARG00000102349	2806.54	0.745012	0.0653126	11.4069	3.86344e-30	6.33296e-28	cep55l
ENSDARG00000045842	2645.51	-1.16916	0.102726	-11.3813	5.18211e-30	8.41042e-28	zgc:113263
ENSDARG00000069966	706.039	1.77805	0.156282	11.3772	5.43391e-30	8.73261e-28	alox5b.3
ENSDARG00000013839	1385.93	0.880387	0.0774508	11.367	6.10155e-30	9.71036e-28	aldh3b1
ENSDARG00000058425	2322.34	0.701407	0.0621184	11.2915	1.44624e-29	2.27949e-27	rab35b
ENSDARG00000055086	2903.79	0.766188	0.0682138	11.2322	2.83479e-29	4.42552e-27	ggnbp2
ENSDARG00000088130	1639.56	0.815833	0.072729	11.2174	3.34834e-29	5.17793e-27	si:dkey-30c15.10
ENSDARG00000021380	307.761	1.49061	0.133204	11.1905	4.5403e-29	6.95557e-27	ppm1db
ENSDARG00000095538	928.196	0.991668	0.0886326	11.1885	4.64041e-29	7.04311e-27	senp3a
ENSDARG00000100264	126.309	2.53451	0.226604	11.1847	4.84358e-29	7.28403e-27	thumpd1
ENSDARG00000099080	2761.16	-0.73581	0.0658228	-11.1787	5.18666e-29	7.72906e-27	sbno1
ENSDARG00000017571	2706.21	-1.05008	0.0939491	-11.1771	5.27775e-29	7.79396e-27	mccc2
ENSDARG00000060252	353.737	-1.59515	0.142928	-11.1605	6.36224e-29	9.31159e-27	mogs
ENSDARG00000043003	2895.53	-1.08584	0.0976259	-11.1225	9.75123e-29	1.41453e-26	pcyt2
ENSDARG00000040245	16354.9	-0.710085	0.0640433	-11.0876	1.44141e-28	2.07259e-26	kpnb3
ENSDARG00000005679	2291.53	-1.02112	0.0921809	-11.0773	1.61648e-28	2.30412e-26	trip10a
ENSDARG00000032340	312.432	-1.65186	0.149674	-11.0364	2.55007e-28	3.60351e-26	serhl
ENSDARG00000101719	698.162	1.03184	0.0935226	11.0331	2.64639e-28	3.70766e-26	pargl
ENSDARG00000093658	1960.89	-0.913163	0.0828664	-11.0197	3.07048e-28	4.26537e-26	tm7sf3
ENSDARG00000074702	7854.46	0.599482	0.0544285	11.0141	3.26745e-28	4.50084e-26	arfgef2
ENSDARG00000060030	6405.62	0.722807	0.0656867	11.0039	3.66084e-28	5.00071e-26	setd1a
ENSDARG00000002271	3549.1	-0.781908	0.0710709	-11.0018	3.7455e-28	5.04116e-26	zfand5b
ENSDARG00000057100	1262.7	-0.830629	0.0755004	-11.0017	3.75197e-28	5.04116e-26	zwilch
ENSDARG00000100524	3454.19	0.697513	0.0634956	10.9852	4.50214e-28	5.99993e-26	abca3b
ENSDARG00000014003	4029.44	0.636266	0.0580933	10.9525	6.46476e-28	8.546e-26	stard8
ENSDARG00000016782	13765.2	0.616724	0.0563349	10.9475	6.83326e-28	8.96086e-26	huwe1
ENSDARG00000057719	3611.8	-0.828895	0.0758314	-10.9308	8.21507e-28	1.06874e-25	atl2
ENSDARG00000001313	3151	-0.785982	0.0722107	-10.8846	1.36548e-27	1.75936e-25	g2e3
ENSDARG00000104734	1460.34	-0.801793	0.073667	-10.884	1.37383e-27	1.75936e-25	kat2a
ENSDARG00000008237	987.082	-1.00787	0.0928152	-10.8589	1.80932e-27	2.2991e-25	sars
ENSDARG00000062916	365.128	-1.48736	0.137045	-10.8531	1.92702e-27	2.42982e-25	mrpl37
ENSDARG00000006757	343.64	2.11949	0.195614	10.8351	2.34821e-27	2.93831e-25	klhl41b
ENSDARG00000011510	7551.82	0.598074	0.0553785	10.7997	3.45149e-27	4.28613e-25	rcc2
ENSDARG00000034409	892.995	-1.13007	0.104956	-10.7671	4.92307e-27	6.06759e-25	pik3r3b
ENSDARG00000017163	1143.53	1.14663	0.106565	10.7599	5.32294e-27	6.51146e-25	sinup
ENSDARG00000100559	1516.04	-0.825745	0.0769157	-10.7357	6.91794e-27	8.39991e-25	tor2a
ENSDARG00000003189	4050.19	-0.712239	0.0665449	-10.7031	9.84019e-27	1.18603e-24	psmd1
ENSDARG00000060366	3527.21	0.717156	0.067091	10.6893	1.14223e-26	1.35677e-24	slc12a9
ENSDARG00000101744	814.699	1.17803	0.110199	10.69	1.13408e-26	1.35677e-24	elavl1b
ENSDARG00000078572	1661.46	0.878644	0.0822075	10.6881	1.15692e-26	1.36433e-24	stox2b
ENSDARG00000038743	8667.03	-0.609582	0.0572713	-10.6437	1.86479e-26	2.17292e-24	copb2
ENSDARG00000071150	1830.43	0.714794	0.0671576	10.6435	1.8691e-26	2.17292e-24	cica
ENSDARG00000037746	12170.4	0.904831	0.0851621	10.6248	2.28468e-26	2.63736e-24	actb1
ENSDARG00000086826	240.243	-2.12103	0.199738	-10.6191	2.43015e-26	2.78566e-24	sult6b1
ENSDARG00000101443	730.951	0.99731	0.0943064	10.5752	3.88274e-26	4.41985e-24	relch
ENSDARG00000076559	2265.94	-0.761556	0.0720527	-10.5694	4.13003e-26	4.66893e-24	rb1cc1
ENSDARG00000035120	2038.5	0.736154	0.069834	10.5415	5.56181e-26	6.24446e-24	gldc
ENSDARG00000007989	318.314	-1.46886	0.139936	-10.4967	8.9489e-26	9.97894e-24	nedd8
ENSDARG00000098235	1128.51	0.891914	0.0852652	10.4605	1.31198e-25	1.4531e-23	actr5
ENSDARG00000100483	270.515	-1.74671	0.167082	-10.4542	1.40108e-25	1.54137e-23	vent
ENSDARG00000037178	1454.42	1.33474	0.12797	10.4302	1.80598e-25	1.97175e-23	zic2b
ENSDARG00000104809	152.876	2.0327	0.194898	10.4296	1.81634e-25	1.97175e-23	top1mt
ENSDARG00000056089	3459.67	0.649439	0.0624878	10.3931	2.66676e-25	2.8759e-23	nrbp1
ENSDARG00000008727	701.719	-0.930189	0.0896016	-10.3814	3.01362e-25	3.22871e-23	ranbp3a
ENSDARG00000017522	2616.12	0.804507	0.0775531	10.3736	3.26882e-25	3.47938e-23	ctdp1
ENSDARG00000011055	893.684	0.942255	0.0910069	10.3537	4.02785e-25	4.25964e-23	fbxo9
ENSDARG00000056458	1838.89	0.728573	0.0704905	10.3358	4.85499e-25	5.10148e-23	lhfpl5b
ENSDARG00000042508	5990.53	0.607871	0.0588286	10.3329	5.00217e-25	5.22265e-23	ubr3
ENSDARG00000115989	342.498	-1.34406	0.130101	-10.3309	5.10797e-25	5.29935e-23	BX323887.1
ENSDARG00000034825	1434.95	-1.09043	0.105596	-10.3264	5.35291e-25	5.51855e-23	uspl1
ENSDARG00000074041	7926.77	0.607222	0.0591141	10.272	9.41821e-25	9.64896e-23	abca5
ENSDARG00000055043	155.197	-2.08085	0.203393	-10.2307	1.44493e-24	1.47114e-22	depdc7a
ENSDARG00000002385	878.607	-1.31059	0.128222	-10.2213	1.59271e-24	1.61158e-22	atm
ENSDARG00000030945	6110.05	0.814468	0.0797009	10.2191	1.62925e-24	1.63844e-22	si:ch211-259g3.4
ENSDARG00000078803	72.3536	3.64387	0.356709	10.2153	1.69435e-24	1.69353e-22	gas2l1
ENSDARG00000104500	2966.9	-0.652242	0.0644498	-10.1202	4.49698e-24	4.46755e-22	fyco1a
ENSDARG00000017230	2942.08	0.629388	0.0623304	10.0976	5.66129e-24	5.59035e-22	fbxw11b
ENSDARG00000027813	3954.83	0.7779	0.0770514	10.0959	5.7622e-24	5.65592e-22	nus1
ENSDARG00000074727	2322.95	-0.62335	0.0617747	-10.0907	6.0728e-24	5.92532e-22	dnajc10
ENSDARG00000062192	2835.04	0.627629	0.0622807	10.0774	6.9522e-24	6.74323e-22	TBC1D8B
ENSDARG00000034080	12084.3	-0.542146	0.0539858	-10.0424	9.92476e-24	9.5698e-22	plcd1b
ENSDARG00000042551	1349.52	0.779944	0.0777399	10.0327	1.09447e-23	1.04915e-21	mboat2b
ENSDARG00000070083	9970.82	0.50761	0.0506508	10.0218	1.22313e-23	1.16567e-21	atp5f1b
ENSDARG00000027744	667.06	0.968547	0.0968743	9.99798	1.55537e-23	1.47373e-21	gadd45ba
ENSDARG00000061147	417.431	-1.24311	0.124364	-9.99571	1.59148e-23	1.49928e-21	zfp64
ENSDARG00000099547	6256.05	0.570696	0.0571736	9.98181	1.83101e-23	1.71508e-21	nbeal1
ENSDARG00000062361	1363.09	-1.25688	0.125992	-9.9759	1.9433e-23	1.80992e-21	PAXBP1
ENSDARG00000052690	120.017	-2.14191	0.215599	-9.9347	2.9407e-23	2.72339e-21	arrdc3a
ENSDARG00000017813	1329.11	-0.944696	0.0951426	-9.92927	3.10516e-23	2.85954e-21	pigs
ENSDARG00000005454	3193.29	0.75648	0.0763438	9.90887	3.80932e-23	3.4884e-21	tacc3
ENSDARG00000101282	1551.38	-0.734795	0.0742383	-9.89779	4.25557e-23	3.87541e-21	zswim6
ENSDARG00000013576	685.73	1.0321	0.10443	9.88321	4.92317e-23	4.45859e-21	gadd45bb
ENSDARG00000004169	3293.8	-0.664949	0.0674387	-9.86005	6.20163e-23	5.58555e-21	stmn1a
ENSDARG00000024642	1698.04	-0.956695	0.0970856	-9.85414	6.57744e-23	5.89166e-21	pip5k1ab
ENSDARG00000015460	10287.7	-0.587449	0.0596586	-9.84686	7.07187e-23	6.29222e-21	racgap1
ENSDARG00000099972	10125.3	0.503262	0.0511111	9.84644	7.1014e-23	6.29222e-21	nup153
ENSDARG00000071037	863.511	-0.871993	0.0887207	-9.82852	8.48543e-23	7.47813e-21	pex13
ENSDARG00000012194	169.027	-1.80064	0.183236	-9.82686	8.62661e-23	7.56189e-21	scp2a
ENSDARG00000062465	714.104	-0.877425	0.0894897	-9.80476	1.07406e-22	9.36488e-21	pgap1
ENSDARG00000006353	4770.08	0.611556	0.0624306	9.79576	1.17407e-22	1.01828e-20	itga5
ENSDARG00000045294	2129.12	-0.618705	0.0632628	-9.77992	1.37313e-22	1.18465e-20	sh3glb1a
ENSDARG00000040284	1548.39	-1.03058	0.105404	-9.77742	1.40748e-22	1.20793e-20	si:dkey-79d12.5
ENSDARG00000060849	1595.43	-0.846643	0.0867317	-9.76164	1.64481e-22	1.40425e-20	dlgap4a
ENSDARG00000043806	471.293	-1.05554	0.108382	-9.73906	2.05453e-22	1.74497e-20	postna
ENSDARG00000005675	14931.7	0.533495	0.0547935	9.73647	2.10744e-22	1.78068e-20	sec61a1l
ENSDARG00000102674	21041.5	0.478446	0.0491704	9.73036	2.23807e-22	1.88136e-20	ckap5
ENSDARG00000019417	244.902	1.45192	0.149377	9.71989	2.48057e-22	2.07456e-20	gadd45ga
ENSDARG00000096095	12004	-0.812939	0.0836572	-9.71751	2.53927e-22	2.11288e-20	buc
ENSDARG00000088899	2563.7	0.608738	0.0628388	9.6873	3.41432e-22	2.82664e-20	ralgapb
ENSDARG00000013317	86.0692	-2.62008	0.270632	-9.68133	3.61964e-22	2.98157e-20	pygmb
ENSDARG00000004576	548.912	-1.04521	0.108095	-9.66934	4.06996e-22	3.33574e-20	plk4
ENSDARG00000067996	3728.13	-0.819619	0.0847852	-9.667	4.16422e-22	3.39602e-20	csk
ENSDARG00000036793	969.253	-0.861705	0.0893163	-9.64779	5.02271e-22	4.07586e-20	ttll5
ENSDARG00000074059	521.732	0.985706	0.102239	9.6412	5.35562e-22	4.3246e-20	dlg5a
ENSDARG00000074201	2966.9	0.57095	0.059377	9.61566	6.86655e-22	5.51747e-20	flna
ENSDARG00000036162	20694.6	0.693994	0.0723245	9.59557	8.34585e-22	6.67342e-20	hnrnpa0b
ENSDARG00000045139	799.335	0.825892	0.0861227	9.58972	8.83279e-22	7.0285e-20	ca7
ENSDARG00000075445	1064.55	-0.768815	0.0802405	-9.58138	9.57548e-22	7.58267e-20	psmb5
ENSDARG00000100583	948.622	0.821168	0.0858717	9.56273	1.14686e-21	9.03817e-20	hid1b
ENSDARG00000101009	896.775	0.960788	0.100592	9.55134	1.28029e-21	1.00414e-19	cited4b
ENSDARG00000012422	82.9638	2.72296	0.285246	9.54599	1.34816e-21	1.05233e-19	col11a2
ENSDARG00000040432	656.53	1.10199	0.115808	9.51567	1.80547e-21	1.40262e-19	klf2b
ENSDARG00000034883	1425.46	-1.06027	0.111474	-9.5114	1.88113e-21	1.45451e-19	acbd5a
ENSDARG00000052518	3167.13	-0.626201	0.065923	-9.49897	2.11979e-21	1.63134e-19	stx4
ENSDARG00000040764	2313.13	1.00233	0.105556	9.49576	2.18621e-21	1.66681e-19	id1
ENSDARG00000069409	881.79	-0.801721	0.0844256	-9.49618	2.17736e-21	1.66681e-19	gkup
ENSDARG00000005989	1148.09	0.852426	0.0898941	9.48255	2.48138e-21	1.87441e-19	rgl1
ENSDARG00000029133	4455.72	0.529012	0.0557869	9.48273	2.47727e-21	1.87441e-19	tubgcp3
ENSDARG00000046053	755.257	0.860991	0.0910811	9.45301	3.29228e-21	2.47556e-19	slc27a6
ENSDARG00000021220	1518.41	-0.958914	0.101454	-9.45171	3.33328e-21	2.49493e-19	hmgcl
ENSDARG00000063416	3501.57	0.631747	0.0668809	9.44584	3.52551e-21	2.62683e-19	ptprk
ENSDARG00000061688	921.307	1.06694	0.113088	9.43455	3.92692e-21	2.91267e-19	arvcfb
ENSDARG00000039007	4072.81	0.602799	0.0639155	9.43119	4.05466e-21	2.99387e-19	eno3
ENSDARG00000092498	1299.58	-0.804423	0.0853219	-9.4281	4.17594e-21	3.0696e-19	si:dkeyp-46h3.2
ENSDARG00000009640	286.671	-1.33645	0.14203	-9.40961	4.97998e-21	3.64428e-19	psmb1
ENSDARG00000043077	1600.68	-1.11095	0.118487	-9.37617	6.84159e-21	4.98433e-19	nisch
ENSDARG00000054906	861.054	0.925679	0.098776	9.37149	7.15155e-21	5.18709e-19	ier5l
ENSDARG00000076829	2528.28	-0.911995	0.0977113	-9.33357	1.02364e-20	7.39187e-19	ankib1b
ENSDARG00000036247	2201.41	-0.631327	0.0676915	-9.32654	1.09388e-20	7.86439e-19	tmem144b
ENSDARG00000078767	2219.13	0.712782	0.0765221	9.31472	1.2227e-20	8.75217e-19	yeats2
ENSDARG00000006766	3430.75	0.593397	0.0638167	9.29847	1.42486e-20	1.01549e-18	snd1
ENSDARG00000045620	1433.43	-0.725358	0.0780313	-9.29574	1.46191e-20	1.03739e-18	nansa
ENSDARG00000112796	716.067	0.931279	0.100571	9.25987	2.04674e-20	1.44613e-18	CU695011.1
ENSDARG00000028976	1368.12	0.916022	0.0989614	9.25635	2.11533e-20	1.48818e-18	pus3
ENSDARG00000104401	5764.16	-0.546045	0.0590446	-9.24801	2.28718e-20	1.6022e-18	yme1l1b
ENSDARG00000052279	231.359	-1.48909	0.161127	-9.24172	2.42568e-20	1.69199e-18	osgn1
ENSDARG00000096939	2397.1	0.982771	0.106364	9.23968	2.47231e-20	1.71721e-18	CU207354.1
ENSDARG00000074985	89.8895	-2.56084	0.277278	-9.23563	2.56776e-20	1.77598e-18	aurkaip1
ENSDARG00000078954	4553.98	0.521229	0.0564954	9.22606	2.80773e-20	1.93379e-18	rxrba
ENSDARG00000058114	243.903	-1.36126	0.147553	-9.22557	2.82045e-20	1.93442e-18	impad1
ENSDARG00000101935	21640.3	0.657797	0.0713186	9.22335	2.87949e-20	1.96669e-18	BX088707.1
ENSDARG00000016934	606.34	-0.885212	0.0963154	-9.19076	3.90074e-20	2.65315e-18	ttyh2
ENSDARG00000070404	252.396	1.35794	0.147816	9.18666	4.05242e-20	2.74493e-18	inka1b
ENSDARG00000019223	1441.66	-0.67162	0.0731555	-9.18071	4.28241e-20	2.88877e-18	arglu1a
ENSDARG00000070545	14138.7	0.47918	0.0524186	9.14141	6.1645e-20	4.14133e-18	top1l
ENSDARG00000012215	3323.04	0.534155	0.0584762	9.13457	6.56667e-20	4.39351e-18	umps
ENSDARG00000018285	4412.39	0.508598	0.0557973	9.11509	7.86021e-20	5.23758e-18	pdpk1b
ENSDARG00000013596	452.437	-1.008	0.110711	-9.10479	8.64316e-20	5.73598e-18	brd1a
ENSDARG00000061952	8671.12	0.518956	0.0571226	9.08496	1.03741e-19	6.85697e-18	ecpas
ENSDARG00000070573	2641.69	0.645728	0.0711014	9.08179	1.06803e-19	7.03099e-18	mapk3
ENSDARG00000002971	1783.09	0.66224	0.0730359	9.06732	1.21977e-19	7.99778e-18	phc1
ENSDARG00000088663	863.895	-0.816345	0.0901513	-9.05528	1.36223e-19	8.89629e-18	lman2lb
ENSDARG00000037060	10824.6	0.48863	0.0540065	9.04762	1.46121e-19	9.50482e-18	kmt2d
ENSDARG00000009881	1060.16	0.980726	0.108406	9.04675	1.47293e-19	9.54321e-18	ier5
ENSDARG00000041703	5869.39	-0.643224	0.071228	-9.03049	1.70904e-19	1.10294e-17	rrbp1b
ENSDARG00000053425	610.433	-1.04214	0.11549	-9.02357	1.82065e-19	1.17036e-17	serinc2l
ENSDARG00000046022	802.814	0.830525	0.0922902	8.99907	2.2764e-19	1.45761e-17	tmed7
ENSDARG00000043128	682.578	1.15698	0.128714	8.98874	2.50074e-19	1.59502e-17	cldne
ENSDARG00000037491	1337.34	0.751194	0.0837865	8.96557	3.08676e-19	1.96117e-17	bmp15
ENSDARG00000012040	10252.1	0.490508	0.0547381	8.961	3.21734e-19	2.03624e-17	rnf19a
ENSDARG00000074229	7415.68	0.665934	0.0743521	8.95649	3.35172e-19	2.11313e-17	prr12a
ENSDARG00000102914	570.782	0.943541	0.105402	8.95181	3.49696e-19	2.19625e-17	dennd4b
ENSDARG00000022280	5878.69	-0.512586	0.0572899	-8.94724	3.6448e-19	2.28036e-17	brd2a
ENSDARG00000029818	5488.48	0.617567	0.0691093	8.9361	4.0315e-19	2.51271e-17	srsf5a
ENSDARG00000032577	463.739	-1.21293	0.136164	-8.90788	5.20168e-19	3.22977e-17	clcn6
ENSDARG00000104907	3052.68	0.619933	0.0696717	8.89792	5.69034e-19	3.51985e-17	ing2
ENSDARG00000062139	4071.39	0.542068	0.0609342	8.89595	5.792e-19	3.56926e-17	eif2ak3
ENSDARG00000095743	14225.7	0.497193	0.0559589	8.88497	6.39394e-19	3.92545e-17	sox11b
ENSDARG00000016447	3043.56	0.599015	0.0674788	8.87708	6.86395e-19	4.19828e-17	ythdf1
ENSDARG00000090675	3846.9	-0.659879	0.0745797	-8.84796	8.91313e-19	5.43138e-17	si:ch73-40i7.5
ENSDARG00000052150	4150.03	0.547951	0.061949	8.8452	9.1364e-19	5.54681e-17	pbx4
ENSDARG00000098785	1188.93	-0.667287	0.0757149	-8.81315	1.21676e-18	7.35983e-17	glrx3
ENSDARG00000015575	383.762	1.16303	0.13232	8.78951	1.50216e-18	9.05273e-17	cyp3c1
ENSDARG00000010301	5623.62	0.591977	0.0673929	8.78397	1.57803e-18	9.47512e-17	b4galt6
ENSDARG00000016337	531.438	-0.880451	0.100287	-8.77931	1.64475e-18	9.83972e-17	lctlb
ENSDARG00000058225	792.939	-0.82539	0.0940201	-8.77886	1.65136e-18	9.84331e-17	arpc4l
ENSDARG00000089302	1070.04	0.845016	0.0963558	8.76975	1.79065e-18	1.06349e-16	hnrnpa0a
ENSDARG00000053963	2096.56	0.59242	0.0676878	8.75224	2.09155e-18	1.23326e-16	npm2b
ENSDARG00000091813	1615.31	-0.850473	0.0971684	-8.75256	2.08561e-18	1.23326e-16	si:dkey-21a6.5
ENSDARG00000069324	3337.89	0.513264	0.0587337	8.73883	2.35528e-18	1.38379e-16	vps53
ENSDARG00000098919	2108.04	-0.564606	0.064618	-8.73759	2.3813e-18	1.39408e-16	smarcc1b
ENSDARG00000101089	719.861	0.852049	0.0976257	8.72772	2.59867e-18	1.51592e-16	gart
ENSDARG00000057983	421.24	-0.98328	0.112728	-8.72262	2.71833e-18	1.5801e-16	svopl
ENSDARG00000095007	1493.64	0.739505	0.0848352	8.71696	2.85772e-18	1.65526e-16	sinhcafl
ENSDARG00000040277	3448.59	0.539333	0.062003	8.6985	3.36304e-18	1.94109e-16	fbxo32
ENSDARG00000103203	307.612	-1.15673	0.133209	-8.68361	3.83395e-18	2.20512e-16	vps28
ENSDARG00000015543	4814.52	0.482486	0.0555941	8.67871	4.0028e-18	2.29419e-16	s100a1
ENSDARG00000037961	1073.28	0.962879	0.111016	8.67332	4.19711e-18	2.39718e-16	rcn3
ENSDARG00000004870	2260.66	0.569333	0.0656613	8.67075	4.29273e-18	2.44328e-16	psen1
ENSDARG00000061520	355.995	-1.42534	0.164632	-8.6577	4.81386e-18	2.71164e-16	b4galnt1a
ENSDARG00000071906	4491.97	-0.553787	0.0639611	-8.65819	4.79307e-18	2.71164e-16	sec24b
ENSDARG00000079939	1158.63	0.765968	0.088471	8.65785	4.80742e-18	2.71164e-16	jmjd1cb
ENSDARG00000037556	5222.87	-0.721899	0.0833883	-8.65708	4.84007e-18	2.71707e-16	st3gal5
ENSDARG00000090870	3586.17	-0.514247	0.0594093	-8.65599	4.88631e-18	2.73367e-16	si:ch1073-263o8.2
ENSDARG00000032603	320.069	-1.24458	0.143827	-8.65327	5.00449e-18	2.79026e-16	st7l
ENSDARG00000099970	5766.89	0.880782	0.101943	8.63993	5.62485e-18	3.12551e-16	CR383676.1
ENSDARG00000010965	762.449	0.801319	0.0927947	8.6354	5.85226e-18	3.24089e-16	psma8
ENSDARG00000104279	895.808	0.962794	0.111968	8.5988	8.05512e-18	4.44578e-16	appa
ENSDARG00000104186	3040.44	-0.731569	0.0852548	-8.58097	9.40755e-18	5.17478e-16	fbxo43
ENSDARG00000042063	2301.3	-0.583609	0.0680293	-8.57878	9.58807e-18	5.25644e-16	si:ch211-145c1.1
ENSDARG00000019103	7031.8	0.585138	0.0682154	8.5778	9.67072e-18	5.28408e-16	kdm4ab
ENSDARG00000069432	5848.12	-0.518414	0.0605362	-8.5637	1.09298e-17	5.95222e-16	plscr3b
ENSDARG00000062893	604.536	0.835447	0.0975658	8.56291	1.10058e-17	5.97375e-16	si:dkey-103i16.6
ENSDARG00000102607	1433.32	0.601457	0.0702453	8.56223	1.10707e-17	5.98912e-16	pmpca
ENSDARG00000008032	9546.44	0.497427	0.0582674	8.53697	1.37784e-17	7.42945e-16	sart3
ENSDARG00000007034	331.52	1.12565	0.132268	8.51036	1.73397e-17	9.31911e-16	hnrpkl
ENSDARG00000103566	567.062	1.24292	0.146122	8.50602	1.80002e-17	9.64246e-16	tomm20b
ENSDARG00000006299	1571.76	-0.696882	0.0820686	-8.49146	2.04066e-17	1.08959e-15	arhgef7a
ENSDARG00000060521	4337.54	0.497477	0.0586485	8.48234	2.20702e-17	1.17459e-15	rbm27
ENSDARG00000058710	2014.26	-0.628466	0.0741424	-8.47647	2.32131e-17	1.23142e-15	terf1
ENSDARG00000002463	1583.14	-0.595353	0.0703272	-8.46547	2.55131e-17	1.34473e-15	arhgef37
ENSDARG00000068755	564.861	-0.838829	0.0990853	-8.46573	2.54557e-17	1.34473e-15	exosc8
ENSDARG00000104559	2860.23	-0.565446	0.0668096	-8.46355	2.59363e-17	1.36265e-15	tmem63ba
ENSDARG00000074858	1946.15	0.740356	0.0875219	8.45909	2.69465e-17	1.41121e-15	stard7
ENSDARG00000086550	2617.76	0.60867	0.072021	8.45129	2.88111e-17	1.50405e-15	dbf4b
ENSDARG00000039217	5991.4	-0.585334	0.0692841	-8.44831	2.9554e-17	1.53793e-15	orc1
ENSDARG00000058953	483.01	1.28932	0.152664	8.44546	3.02843e-17	1.57095e-15	abcc4
ENSDARG00000054250	504.957	-1.21162	0.143563	-8.4396	3.18423e-17	1.64656e-15	crbn
ENSDARG00000062872	1783.19	-0.690615	0.0819736	-8.42484	3.6124e-17	1.86209e-15	mrs2
ENSDARG00000091768	597.134	0.894465	0.10619	8.42322	3.66277e-17	1.88213e-15	dclre1a
ENSDARG00000092305	2269.22	-0.599956	0.0713146	-8.41281	4.00309e-17	2.05058e-15	poldip2
ENSDARG00000074686	1716.74	-0.643042	0.0764498	-8.4113	4.05481e-17	2.07061e-15	oga
ENSDARG00000009745	6707.03	-0.790538	0.0941606	-8.39564	4.63376e-17	2.3589e-15	fbxw2
ENSDARG00000016086	3070.15	-0.738066	0.0881844	-8.36958	5.7826e-17	2.93463e-15	smurf1
ENSDARG00000074645	6556.04	0.484929	0.0579486	8.36825	5.84782e-17	2.95856e-15	CABZ01032476.1
ENSDARG00000056473	4582.26	-0.502308	0.0600314	-8.36742	5.8891e-17	2.97028e-15	chaf1b
ENSDARG00000098405	4011.45	0.527191	0.0631061	8.35404	6.59665e-17	3.31694e-15	map3k1
ENSDARG00000062765	1973.92	0.603537	0.0723406	8.34299	7.2438e-17	3.6312e-15	nsd3
ENSDARG00000102252	1405.3	0.639087	0.0766204	8.34095	7.36987e-17	3.68314e-15	USP34
ENSDARG00000003866	1688.44	0.615899	0.0738843	8.33599	7.68527e-17	3.82908e-15	tm9sf2
ENSDARG00000101220	1490.74	-0.812374	0.0975851	-8.32477	8.44914e-17	4.19692e-15	polrmt
ENSDARG00000005191	3112.84	-0.555279	0.0667955	-8.31312	9.32201e-17	4.61651e-15	ahcy
ENSDARG00000103271	2849.11	-0.736214	0.0886031	-8.30913	9.64057e-17	4.75989e-15	pla2g15
ENSDARG00000089981	3446.9	0.576148	0.0693825	8.30394	1.00713e-16	4.95762e-15	rnf146
ENSDARG00000045308	4311.67	0.542022	0.0653025	8.30017	1.03962e-16	5.10222e-15	pola1
ENSDARG00000055120	18872.1	-0.554678	0.0669464	-8.2854	1.1771e-16	5.75973e-15	ctsba
ENSDARG00000105669	5877.71	-0.437865	0.0528721	-8.28159	1.21544e-16	5.92964e-15	si:dkey-10f23.2
ENSDARG00000071541	517.805	-0.981973	0.118603	-8.2795	1.2369e-16	6.01641e-15	si:dkey-42i9.8
ENSDARG00000014430	3135.83	-0.591163	0.0714177	-8.27754	1.25745e-16	6.09825e-15	rabgef1
ENSDARG00000105465	864.523	0.894744	0.108309	8.26103	1.4442e-16	6.98329e-15	BX005228.1
ENSDARG00000061338	2555.08	0.523914	0.0635723	8.24122	1.70466e-16	8.21846e-15	ddx6
ENSDARG00000006514	582.141	1.14729	0.139297	8.23633	1.77578e-16	8.53625e-15	her6
ENSDARG00000069074	3073.36	-0.498931	0.0605955	-8.2338	1.81364e-16	8.69277e-15	cry1ba
ENSDARG00000096454	1076.28	0.642565	0.0780677	8.23087	1.85858e-16	8.88217e-15	ap1m2
ENSDARG00000096817	78.0667	-2.10809	0.256177	-8.22905	1.88709e-16	8.96612e-15	CR854832.1
ENSDARG00000098443	1737.95	-0.666643	0.0810101	-8.22914	1.88557e-16	8.96612e-15	zfand6
ENSDARG00000060994	3750.29	0.596829	0.0725515	8.22629	1.93106e-16	9.14854e-15	fbxw7
ENSDARG00000016484	6374.88	0.555498	0.0675667	8.22148	2.01002e-16	9.49519e-15	dkc1
ENSDARG00000087393	3660.02	0.555901	0.0676683	8.21509	2.12005e-16	9.98619e-15	prr11
ENSDARG00000096651	1020.93	0.920302	0.112177	8.20402	2.32471e-16	1.09188e-14	gpr108
ENSDARG00000030441	1895.66	-0.58388	0.0712056	-8.19992	2.40548e-16	1.12659e-14	ppa1b
ENSDARG00000003328	2066.29	0.61658	0.0752327	8.19564	2.49261e-16	1.16407e-14	slf2
ENSDARG00000069937	1696.4	0.646864	0.0789399	8.19438	2.51878e-16	1.17295e-14	dnm2a
ENSDARG00000056121	442.54	-0.960713	0.117575	-8.17106	3.05685e-16	1.41949e-14	serac1
ENSDARG00000045514	2921.74	0.557048	0.0682523	8.16161	3.30587e-16	1.53078e-14	atp5f1c
ENSDARG00000075437	1554.29	0.596709	0.0731971	8.15209	3.57697e-16	1.65165e-14	shc1
ENSDARG00000043271	117.423	-2.05228	0.251875	-8.14799	3.70014e-16	1.70373e-14	morc3b
ENSDARG00000055075	2423.14	0.542733	0.0667405	8.13198	4.2234e-16	1.93922e-14	svila
ENSDARG00000042213	505.125	0.861432	0.106007	8.1262	4.4297e-16	2.02826e-14	si:ch211-233h19.2
ENSDARG00000099742	6782.76	0.440299	0.0542092	8.12222	4.57746e-16	2.09008e-14	heatr1
ENSDARG00000013528	720.819	1.05583	0.130154	8.1121	4.9751e-16	2.26533e-14	mcm9
ENSDARG00000043406	1596.84	0.575877	0.0709962	8.11138	5.00484e-16	2.27256e-14	slc8a1b
ENSDARG00000003091	3290.5	-0.52274	0.064629	-8.08832	6.04916e-16	2.73916e-14	oclnb
ENSDARG00000054777	473.306	0.936442	0.11592	8.07838	6.56316e-16	2.96373e-14	si:dkey-46a10.3
ENSDARG00000014041	3854.15	-0.511713	0.0633838	-8.07324	6.8458e-16	3.08287e-14	smarcad1a
ENSDARG00000014657	144.302	1.99942	0.248135	8.0578	7.76803e-16	3.48859e-14	zgc:171731
ENSDARG00000099798	4218.74	0.49143	0.0610738	8.04649	8.52014e-16	3.81591e-14	mon2
ENSDARG00000038785	6270.37	-0.566547	0.0704349	-8.04356	8.72646e-16	3.89766e-14	abcf2a
ENSDARG00000059701	10342.3	0.51515	0.0640882	8.03814	9.12113e-16	4.06287e-14	flii
ENSDARG00000007045	1564.27	-0.660323	0.0821953	-8.0336	9.46565e-16	4.2049e-14	cnot4a
ENSDARG00000002571	621.758	0.783243	0.0975108	8.03237	9.56059e-16	4.2356e-14	tmod2
ENSDARG00000017010	1496.06	-0.593372	0.0739314	-8.02597	1.00725e-15	4.45035e-14	scamp2l
ENSDARG00000006837	332.691	1.26597	0.15787	8.01906	1.06562e-15	4.69559e-14	mycn
ENSDARG00000004256	422.719	-1.03492	0.129233	-8.00816	1.16434e-15	5.11685e-14	wnt11
ENSDARG00000070043	2162.45	-0.555357	0.0694215	-7.99979	1.24631e-15	5.46245e-14	dars
ENSDARG00000007923	3439.51	0.54894	0.0686826	7.99241	1.32324e-15	5.78416e-14	ptpn1
ENSDARG00000070432	11100.3	-0.527356	0.0660413	-7.98524	1.40248e-15	6.1142e-14	ino80
ENSDARG00000068883	196.228	-1.36286	0.170725	-7.98279	1.43059e-15	6.2202e-14	tspan13a
ENSDARG00000014139	2741.31	0.545449	0.0684128	7.97292	1.54974e-15	6.72044e-14	srp72
ENSDARG00000099448	412.402	0.890143	0.111679	7.97052	1.58014e-15	6.8342e-14	sh3d21
ENSDARG00000070426	3973.7	-0.61402	0.0771128	-7.96263	1.68427e-15	7.25941e-14	chac1
ENSDARG00000114748	3079.58	-0.784651	0.0985446	-7.9624	1.68731e-15	7.25941e-14	BX957231.1
ENSDARG00000035869	3865.97	-0.52645	0.0661245	-7.9615	1.69969e-15	7.29353e-14	azin1b
ENSDARG00000036040	2225.97	0.632936	0.0795344	7.95802	1.74813e-15	7.48183e-14	atg13
ENSDARG00000015374	1348.93	-0.67973	0.0854185	-7.95763	1.75359e-15	7.48566e-14	st3gal3a
ENSDARG00000052617	5976.49	0.471789	0.0593063	7.95513	1.78946e-15	7.61891e-14	raver1
ENSDARG00000099642	2090.98	-0.719892	0.0905267	-7.95226	1.8314e-15	7.77726e-14	dcun1d1
ENSDARG00000062568	1286.4	0.643875	0.0809788	7.95115	1.84789e-15	7.82703e-14	mrpl2
ENSDARG00000014428	2511.16	0.576814	0.0726495	7.93968	2.02703e-15	8.5637e-14	ppp2r5d
ENSDARG00000019426	4271.67	0.498031	0.0627546	7.93616	2.08539e-15	8.78758e-14	trioa
ENSDARG00000052746	716.477	0.75692	0.0953895	7.93504	2.10426e-15	8.84436e-14	grinab
ENSDARG00000019644	9245.57	0.433908	0.0547743	7.92174	2.34217e-15	9.81914e-14	ldhba
ENSDARG00000042544	903.553	-0.642808	0.0812502	-7.91146	2.5439e-15	1.06376e-13	degs2
ENSDARG00000035924	4887.91	-0.717997	0.0908037	-7.90714	2.63368e-15	1.0985e-13	dync1li2
ENSDARG00000020079	1963.25	-0.638811	0.0808144	-7.90466	2.68663e-15	1.11775e-13	neil3
ENSDARG00000079552	4410.9	0.475227	0.0603154	7.87902	3.29953e-15	1.36926e-13	maml3
ENSDARG00000014914	41291.8	-0.406707	0.0516475	-7.87468	3.41622e-15	1.41411e-13	lamp2
ENSDARG00000019239	2175.42	-0.513983	0.0653732	-7.86228	3.7719e-15	1.55741e-13	cul1a
ENSDARG00000006257	4455.4	0.478638	0.060914	7.85759	3.91586e-15	1.61278e-13	vldlr
ENSDARG00000003795	1654.93	0.572461	0.0728726	7.85564	3.97732e-15	1.62996e-13	idh2
ENSDARG00000104953	4647.73	0.576762	0.0734201	7.85564	3.97746e-15	1.62996e-13	stt3a
ENSDARG00000005246	1097.24	-0.758554	0.0966111	-7.85162	4.10691e-15	1.67464e-13	asb3
ENSDARG00000074979	465.397	-1.00966	0.128587	-7.85193	4.09693e-15	1.67464e-13	larp4ab
ENSDARG00000044083	1019.29	-0.831906	0.105987	-7.84916	4.18836e-15	1.70361e-13	peli1b
ENSDARG00000042821	827.17	0.686233	0.0875388	7.83919	4.53466e-15	1.83991e-13	agps
ENSDARG00000068992	58047.4	0.426487	0.0544283	7.83575	4.66068e-15	1.88637e-13	hspa8
ENSDARG00000045352	127.579	1.63949	0.209308	7.83294	4.76607e-15	1.92427e-13	cst14a.2
ENSDARG00000076464	543.606	-0.811639	0.103679	-7.82841	4.94081e-15	1.98992e-13	lamtor1
ENSDARG00000025500	2970.4	-0.606629	0.0774953	-7.82795	4.95901e-15	1.99235e-13	mtx1a
ENSDARG00000041708	1179.19	0.863316	0.110318	7.82568	5.04907e-15	2.02358e-13	kat14
ENSDARG00000011723	370.306	0.941361	0.120411	7.81789	5.37159e-15	2.14759e-13	zgc:56556
ENSDARG00000079588	545.045	-1.14103	0.146072	-7.81142	5.65451e-15	2.2552e-13	castor1
ENSDARG00000007603	242.401	1.14063	0.146174	7.80319	6.03609e-15	2.40154e-13	stxbp2
ENSDARG00000093787	103.529	2.05889	0.263982	7.79938	6.2214e-15	2.46928e-13	CR450686.3
ENSDARG00000043236	25113.6	-0.784491	0.100597	-7.79837	6.27097e-15	2.48294e-13	ccna1
ENSDARG00000002880	654.358	-0.795921	0.102091	-7.7962	6.38004e-15	2.52004e-13	vps50
ENSDARG00000100597	177.748	1.33644	0.171555	7.79017	6.69203e-15	2.63692e-13	ubxn4
ENSDARG00000033320	339.555	-1.25752	0.161655	-7.779	7.30981e-15	2.87344e-13	sar1ab
ENSDARG00000068995	3176.53	0.78424	0.10085	7.77633	7.46582e-15	2.92775e-13	h2afx1
ENSDARG00000024195	851.986	0.809275	0.104239	7.76362	8.25371e-15	3.22899e-13	znf395b
ENSDARG00000025788	2005.57	-0.671805	0.0866777	-7.75061	9.14547e-15	3.56934e-13	chp2
ENSDARG00000076228	1400.61	-0.623133	0.0804096	-7.74948	9.22679e-15	3.59253e-13	kif2c
ENSDARG00000094859	604.612	0.867848	0.112014	7.74765	9.36057e-15	3.63598e-13	si:dkey-11o15.10
ENSDARG00000076870	1014.8	0.686268	0.0885982	7.74584	9.49487e-15	3.67943e-13	piezo1
ENSDARG00000003250	2077.09	-0.531099	0.0686026	-7.74168	9.81148e-15	3.79316e-13	pik3cd
ENSDARG00000007494	1847.97	-0.598872	0.0774501	-7.73236	1.0557e-14	4.07176e-13	st3gal8
ENSDARG00000003695	2642.38	0.586962	0.0759296	7.73034	1.07259e-14	4.12722e-13	vdac3
ENSDARG00000035147	1096.88	-2.29561	0.297025	-7.72867	1.08679e-14	4.17206e-13	lrwd1
ENSDARG00000101270	1272.89	0.664651	0.0861066	7.71893	1.17311e-14	4.49289e-13	klhl8
ENSDARG00000028118	641.858	0.807731	0.104959	7.69566	1.4076e-14	5.37843e-13	dscamb
ENSDARG00000100108	2348.54	0.489204	0.0635724	7.69523	1.41243e-14	5.38432e-13	cul3b
ENSDARG00000034685	870.032	-0.946493	0.12304	-7.69259	1.44188e-14	5.48383e-13	tmem198b
ENSDARG00000075851	1312.85	-0.683812	0.0889114	-7.69094	1.46064e-14	5.5295e-13	oafa
ENSDARG00000101043	1509.12	0.654015	0.0850355	7.69108	1.45896e-14	5.5295e-13	ppl
ENSDARG00000039934	194.957	-1.22252	0.158963	-7.69063	1.46415e-14	5.53004e-13	hlcs
ENSDARG00000057562	1297.1	0.615347	0.0800723	7.68488	1.53135e-14	5.74922e-13	polr3c
ENSDARG00000092546	1619.86	-0.52554	0.0683872	-7.68477	1.53269e-14	5.74922e-13	pdap1a
ENSDARG00000103525	317.673	1.44828	0.188461	7.68477	1.5327e-14	5.74922e-13	LO017790.1
ENSDARG00000087844	323.575	-1.10024	0.143252	-7.68044	1.58541e-14	5.93335e-13	plekhn1
ENSDARG00000107283	451.244	-0.918996	0.119836	-7.66878	1.73642e-14	6.48369e-13	BX571813.1
ENSDARG00000042793	2301.52	-0.574644	0.0749579	-7.66622	1.77142e-14	6.59934e-13	tpp1
ENSDARG00000044562	3783.65	0.574548	0.0749673	7.66399	1.80245e-14	6.69971e-13	cycsb
ENSDARG00000099139	713.058	0.725519	0.0947643	7.65604	1.91753e-14	7.11135e-13	fbxw5
ENSDARG00000037647	496.35	-0.802679	0.104863	-7.65453	1.94015e-14	7.17899e-13	rnf175
ENSDARG00000079463	112.661	2.01237	0.262936	7.65346	1.95639e-14	7.22276e-13	man2b2
ENSDARG00000001057	705.897	0.698444	0.0913507	7.64574	2.07747e-14	7.65255e-13	bysl
ENSDARG00000014292	2004.88	-0.766648	0.100289	-7.64441	2.09913e-14	7.71502e-13	med15
ENSDARG00000043485	412.938	0.891597	0.116647	7.64354	2.11327e-14	7.7496e-13	si:ch211-22i13.2
ENSDARG00000013763	4316.32	-0.594284	0.0777831	-7.64027	2.16762e-14	7.93117e-13	rrbp1a
ENSDARG00000035680	4209.62	-0.525679	0.0688166	-7.63884	2.19182e-14	8.00186e-13	zgc:113424
ENSDARG00000089877	810.992	0.77721	0.101791	7.63537	2.25165e-14	8.20202e-13	si:dkeyp-75h12.5
ENSDARG00000040717	1106.97	0.766203	0.100381	7.63292	2.29495e-14	8.34121e-13	macc1
ENSDARG00000099771	1414.05	0.620092	0.0812624	7.63074	2.33407e-14	8.46462e-13	gne
ENSDARG00000079055	1742.99	0.595075	0.0780706	7.62227	2.49261e-14	9.01963e-13	si:dkey-85a20.4
ENSDARG00000029533	2468.11	0.575216	0.0755146	7.61729	2.59061e-14	9.35359e-13	rpl18
ENSDARG00000030756	27530.5	-0.532751	0.0700783	-7.60223	2.9107e-14	1.04862e-12	dnmt1
ENSDARG00000010779	6783.17	0.477506	0.0629692	7.58318	3.37192e-14	1.21212e-12	tlk2
ENSDARG00000075323	2710.41	0.513894	0.0681689	7.53854	4.75249e-14	1.70466e-12	srfbp1
ENSDARG00000019924	1682.44	0.520206	0.0690562	7.53309	4.95536e-14	1.77354e-12	cmpk
ENSDARG00000005840	976.792	-0.640187	0.0849975	-7.53183	5.0033e-14	1.7868e-12	got2b
ENSDARG00000078734	100.55	2.06668	0.274444	7.53045	5.05652e-14	1.80188e-12	myo1f
ENSDARG00000060841	5657.12	-0.498899	0.066314	-7.52329	5.34149e-14	1.8993e-12	pik3c2a
ENSDARG00000059841	458.191	0.814507	0.108326	7.51902	5.51884e-14	1.95811e-12	exosc1
ENSDARG00000035954	2559.6	0.524109	0.0698265	7.50587	6.10214e-14	2.16039e-12	tdp2b
ENSDARG00000062561	928.802	-0.73495	0.097939	-7.50417	6.18208e-14	2.18398e-12	adck1
ENSDARG00000040123	534.567	-0.797839	0.106344	-7.50244	6.26412e-14	2.2082e-12	zfpm2a
ENSDARG00000016763	2539.8	0.450591	0.0602602	7.47742	7.57978e-14	2.66626e-12	znf292a
ENSDARG00000061600	754.143	-0.757331	0.101412	-7.46783	8.15257e-14	2.8616e-12	cemip2
ENSDARG00000018423	377.671	-0.916185	0.122694	-7.46723	8.1898e-14	2.86853e-12	sulf2a
ENSDARG00000019507	4634.36	0.420844	0.0564063	7.46093	8.59131e-14	3.00275e-12	mcm5
ENSDARG00000018738	2198.7	-0.593644	0.0796505	-7.45311	9.11677e-14	3.17962e-12	zw10
ENSDARG00000009830	35918.1	0.372635	0.0500582	7.44404	9.76534e-14	3.39859e-12	hdlbpa
ENSDARG00000061525	7796.26	-0.460088	0.0618152	-7.44295	9.84578e-14	3.41932e-12	slka
ENSDARG00000044062	2735.28	0.466922	0.0627982	7.43527	1.04352e-13	3.61637e-12	ctbp2a
ENSDARG00000062973	835.005	-0.66604	0.0896622	-7.42832	1.09982e-13	3.80342e-12	ttll7
ENSDARG00000070055	1946.55	-0.529823	0.0713434	-7.42637	1.11616e-13	3.85179e-12	arfip1
ENSDARG00000063182	6378.45	0.401071	0.0540708	7.41752	1.19332e-13	4.10945e-12	rc3h1b
ENSDARG00000104702	2154.78	0.494099	0.0666343	7.41508	1.21552e-13	4.17711e-12	cat
ENSDARG00000070981	1373.39	0.691936	0.0933653	7.41107	1.25285e-13	4.29637e-12	ash1l
ENSDARG00000055113	10511.5	0.393184	0.0530715	7.40857	1.27666e-13	4.36888e-12	pom121
ENSDARG00000011583	1980.46	-0.819292	0.110659	-7.40378	1.32362e-13	4.52017e-12	cry1ab
ENSDARG00000038835	855.358	0.701872	0.0948156	7.4025	1.33647e-13	4.55455e-12	ppid
ENSDARG00000028058	851.956	-0.619296	0.0838366	-7.38694	1.50252e-13	5.10981e-12	traf6
ENSDARG00000023396	701.481	-0.68404	0.0926781	-7.38081	1.57325e-13	5.33929e-12	atg5
ENSDARG00000076074	2379.39	0.473824	0.0642006	7.38036	1.57859e-13	5.34634e-12	dda1
ENSDARG00000073867	77.3948	-1.8385	0.249151	-7.37904	1.59433e-13	5.38852e-12	rex1bd
ENSDARG00000074161	3146.77	0.469749	0.0637525	7.36833	1.72778e-13	5.81841e-12	tnrc6b
ENSDARG00000074656	8642.22	0.469818	0.0637623	7.36827	1.72863e-13	5.81841e-12	ctss2.1
ENSDARG00000075400	3364.5	0.563211	0.0764648	7.36563	1.76316e-13	5.92248e-12	fbxo33
ENSDARG00000112586	94.9819	-1.83419	0.249162	-7.36147	1.81899e-13	6.09753e-12	si:ch211-283l16.1
ENSDARG00000008502	746.321	-0.682889	0.0928093	-7.35798	1.86711e-13	6.22067e-12	pno1
ENSDARG00000011934	4980.17	0.534106	0.0725871	7.35815	1.8648e-13	6.22067e-12	gyg1a
ENSDARG00000079848	4837.59	0.419129	0.0569598	7.35833	1.86225e-13	6.22067e-12	gmps
ENSDARG00000074995	1013.01	0.659849	0.0898152	7.34675	2.03089e-13	6.75262e-12	eif2b5
ENSDARG00000013623	3101.68	-0.438676	0.0597645	-7.34009	2.13458e-13	7.083e-12	vdac2
ENSDARG00000097583	3247.69	0.568183	0.0775631	7.32543	2.38135e-13	7.88588e-12	arfgap3
ENSDARG00000012519	19592.8	0.376912	0.0514886	7.3203	2.47411e-13	8.17653e-12	hcfc1b
ENSDARG00000060101	862.723	0.637983	0.0873232	7.306	2.7521e-13	9.07693e-12	trappc12
ENSDARG00000054191	918.476	0.818274	0.112105	7.29918	2.89531e-13	9.53009e-12	pgk1
ENSDARG00000098666	633.869	-0.833099	0.114153	-7.29807	2.91925e-13	9.58966e-12	si:dkey-93h22.8
ENSDARG00000000068	1880.54	0.556258	0.0763397	7.28661	3.17853e-13	1.04205e-11	slc9a3r1a
ENSDARG00000058448	510.109	-0.824721	0.113208	-7.28498	3.21714e-13	1.0526e-11	zrsr2
ENSDARG00000014499	911.577	0.594567	0.0816285	7.28381	3.24514e-13	1.05965e-11	nutf2l
ENSDARG00000001220	5854.47	0.4146	0.0569648	7.27818	3.38363e-13	1.10267e-11	mycbp2
ENSDARG00000062310	742.497	-0.671598	0.0922936	-7.27675	3.41946e-13	1.11214e-11	wdr26a
ENSDARG00000031044	389.979	0.878035	0.120941	7.26	3.87083e-13	1.25645e-11	lipg
ENSDARG00000024306	2454.75	0.514399	0.0708707	7.25828	3.92054e-13	1.27007e-11	zbed4
ENSDARG00000067669	281.698	0.950273	0.131014	7.25322	4.06977e-13	1.31581e-11	zglp1
ENSDARG00000089042	511.967	0.901555	0.124308	7.25259	4.0888e-13	1.31936e-11	foxb1a
ENSDARG00000091947	568.705	-0.939967	0.129641	-7.25052	4.15164e-13	1.33701e-11	znf106b
ENSDARG00000115506	55.8088	-2.3712	0.327208	-7.24677	4.26842e-13	1.37192e-11	si:dkey-122c11.8
ENSDARG00000110179	1287.52	0.60486	0.0835137	7.24264	4.40019e-13	1.41151e-11	AL929305.1
ENSDARG00000020986	1160.84	-0.751328	0.103769	-7.24042	4.47311e-13	1.43209e-11	ctu1
ENSDARG00000076889	2590.64	-0.449993	0.0622052	-7.234	4.68964e-13	1.49849e-11	ralgapa1
ENSDARG00000079751	2491.27	0.490156	0.0678909	7.21976	5.20789e-13	1.66085e-11	megf8
ENSDARG00000070174	469.269	0.817182	0.11326	7.21513	5.38834e-13	1.71506e-11	PLEKHH3
ENSDARG00000101362	1348.02	-0.709918	0.0985381	-7.2045	5.82581e-13	1.85071e-11	mibp
ENSDARG00000022350	2039.05	0.615617	0.0854563	7.20388	5.8522e-13	1.8555e-11	nek1
ENSDARG00000060875	97.3832	-1.57268	0.218392	-7.20119	5.96905e-13	1.88889e-11	pde1a
ENSDARG00000070822	4410.94	-0.555644	0.0771859	-7.19877	6.07561e-13	1.91891e-11	cnp
ENSDARG00000092337	101.874	1.93745	0.269317	7.19392	6.29563e-13	1.98458e-11	CU467861.1
ENSDARG00000117211	1658.01	0.538917	0.0751493	7.17129	7.42964e-13	2.33755e-11	CR936462.1
ENSDARG00000056985	1229.11	0.544314	0.0759068	7.17083	7.45461e-13	2.34092e-11	tpte
ENSDARG00000112667	93.259	-1.69879	0.237002	-7.16783	7.61977e-13	2.38821e-11	tp53rk
ENSDARG00000074311	1874.87	0.546713	0.0763034	7.16499	7.77944e-13	2.4336e-11	mast2
ENSDARG00000112126	182.625	-1.14458	0.159755	-7.16456	7.80385e-13	2.43658e-11	znf995
ENSDARG00000045444	603.564	0.698778	0.0976631	7.15498	8.36824e-13	2.60784e-11	fzd8a
ENSDARG00000110325	263.376	0.998587	0.139743	7.14589	8.94178e-13	2.78128e-11	zgc:153733
ENSDARG00000024219	4957.5	0.398433	0.0557723	7.14392	9.07073e-13	2.81605e-11	zgc:55582
ENSDARG00000079015	4099.32	-0.550249	0.0770621	-7.14033	9.31068e-13	2.88508e-11	brca2
ENSDARG00000022659	1197.1	0.574447	0.080456	7.13989	9.34079e-13	2.88895e-11	snx4
ENSDARG00000079905	3280.28	0.435636	0.0610169	7.13961	9.35982e-13	2.88938e-11	mark2a
ENSDARG00000102119	136.029	1.4159	0.198496	7.13314	9.81012e-13	3.0227e-11	si:ch73-359m17.2
ENSDARG00000068461	287.829	1.18756	0.166547	7.13053	9.99848e-13	3.07495e-11	zgc:162939
ENSDARG00000016474	821.742	-0.673684	0.0946723	-7.11596	1.11141e-12	3.41164e-11	galcb
ENSDARG00000098438	486.744	0.933439	0.131243	7.11229	1.14137e-12	3.49706e-11	slc6a6b
ENSDARG00000022996	19377.6	0.384197	0.0540402	7.10948	1.16484e-12	3.56233e-11	setx
ENSDARG00000063309	2657.26	0.477363	0.0671667	7.10713	1.18477e-12	3.61652e-11	tjp2a
ENSDARG00000015126	1685.2	0.79478	0.111888	7.10333	1.21785e-12	3.7106e-11	gorasp2
ENSDARG00000021859	2790.89	0.515359	0.072621	7.09655	1.27905e-12	3.88263e-11	erap1b
ENSDARG00000078935	4793.5	0.393558	0.055456	7.09677	1.27704e-12	3.88263e-11	ttll4
ENSDARG00000044521	2324.08	-0.490836	0.0692113	-7.09184	1.32341e-12	4.00985e-11	eef1b2
ENSDARG00000076703	787.676	-0.719232	0.101517	-7.08483	1.39214e-12	4.21034e-11	zfand4
ENSDARG00000036214	1945.26	0.474609	0.0670238	7.0812	1.42915e-12	4.31429e-11	dazl
ENSDARG00000076473	2688.84	0.518817	0.0732733	7.08057	1.43558e-12	4.32573e-11	trim37
ENSDARG00000022970	678.605	-0.670786	0.0947803	-7.07727	1.47019e-12	4.42189e-11	tm9sf1
ENSDARG00000079957	3913.65	-0.586056	0.0828196	-7.0763	1.48059e-12	4.44502e-11	eloal
ENSDARG00000012387	2404.79	-0.444056	0.0627897	-7.07211	1.5259e-12	4.57269e-11	pdha1a
ENSDARG00000019231	5916.64	0.449596	0.063635	7.06524	1.6034e-12	4.79616e-11	sptan1
ENSDARG00000057738	1910.02	0.485462	0.0688025	7.05588	1.7151e-12	5.12092e-11	hells
ENSDARG00000003098	5732.28	0.603263	0.0855426	7.05219	1.76121e-12	5.24904e-11	kdm5bb
ENSDARG00000076320	119.059	1.61512	0.229124	7.04914	1.80023e-12	5.35559e-11	ano9a
ENSDARG00000092919	1549.75	-0.518133	0.0735186	-7.04764	1.81973e-12	5.40382e-11	zp3c
ENSDARG00000074223	897.442	-0.602127	0.0856951	-7.02638	2.11956e-12	6.28278e-11	MDFIC
ENSDARG00000057973	1257.62	-0.643042	0.0915436	-7.02444	2.14923e-12	6.35925e-11	dph1
ENSDARG00000040874	1223.33	0.666594	0.0949163	7.02296	2.1721e-12	6.40378e-11	add3a
ENSDARG00000055433	535.172	-0.723687	0.103044	-7.02308	2.17034e-12	6.40378e-11	vps26bl
ENSDARG00000086126	1717.64	-0.661419	0.0941954	-7.02178	2.19066e-12	6.44692e-11	trim33l
ENSDARG00000010878	574.776	0.890643	0.126868	7.02025	2.21468e-12	6.50591e-11	cdkn1ca
ENSDARG00000069157	1185.23	0.628862	0.0896041	7.01823	2.24702e-12	6.58911e-11	tmem135
ENSDARG00000061752	3071.63	-0.417131	0.0594771	-7.01331	2.3275e-12	6.81291e-11	ripor2
ENSDARG00000013475	1064.08	-0.664899	0.0948984	-7.00643	2.44478e-12	7.14346e-11	cct4
ENSDARG00000071424	1339.58	0.521931	0.0745088	7.00495	2.47078e-12	7.20659e-11	ap3d1
ENSDARG00000044874	1639.32	0.535486	0.0767119	6.98049	2.94159e-12	8.56458e-11	zgc:92107
ENSDARG00000079994	4827.16	-0.638966	0.0915706	-6.97785	2.99736e-12	8.71149e-11	AKAP13
ENSDARG00000039082	11064.3	-0.479737	0.0687697	-6.976	3.03704e-12	8.81118e-11	zgc:123010
ENSDARG00000041170	1335.66	-0.535097	0.0767291	-6.97385	3.08385e-12	8.93119e-11	aagab
ENSDARG00000028067	586.067	0.664697	0.095321	6.97325	3.09697e-12	8.95336e-11	bnip3lb
ENSDARG00000077811	3127.84	0.774338	0.111126	6.96808	3.21305e-12	9.2726e-11	sox11a
ENSDARG00000068265	109.42	-1.4931	0.214289	-6.96769	3.22185e-12	9.28166e-11	tomm5
ENSDARG00000062123	3237.6	-0.507361	0.072915	-6.95826	3.44508e-12	9.90731e-11	agap1
ENSDARG00000058479	67.2821	2.01402	0.289728	6.95142	3.61637e-12	1.03817e-10	zgc:110425
ENSDARG00000057481	81.9466	-1.75436	0.252573	-6.94593	3.75974e-12	1.07744e-10	RNF157
ENSDARG00000008976	3773.94	0.508535	0.0732437	6.94306	3.83697e-12	1.09765e-10	mdn1
ENSDARG00000045801	419.903	0.957757	0.137965	6.94201	3.8657e-12	1.10395e-10	fbxl14b
ENSDARG00000104085	1148.37	-0.710507	0.102432	-6.9364	4.02215e-12	1.14663e-10	abcd3a
ENSDARG00000035715	994.927	0.809699	0.116842	6.92986	4.21243e-12	1.19879e-10	marcksl1b
ENSDARG00000099936	536.561	0.757671	0.109432	6.92366	4.40124e-12	1.25035e-10	nlrc3l
ENSDARG00000025375	534.313	0.741245	0.107163	6.91699	4.61348e-12	1.30838e-10	idh1
ENSDARG00000030440	894.512	0.585448	0.084772	6.90614	4.98012e-12	1.40992e-10	rsrp1
ENSDARG00000113225	402.278	-0.834712	0.121043	-6.89597	5.34994e-12	1.512e-10	CR450764.3
ENSDARG00000088293	233.088	1.02662	0.14894	6.89287	5.46762e-12	1.5426e-10	doc2b
ENSDARG00000079578	3066.89	0.568972	0.0826008	6.88821	5.64999e-12	1.59132e-10	rbpms2b
ENSDARG00000042215	1264.42	0.57575	0.0835897	6.8878	5.66607e-12	1.59311e-10	pias4b
ENSDARG00000095879	1485.66	0.553759	0.080431	6.88489	5.78318e-12	1.62325e-10	wdr46
ENSDARG00000025889	1832.88	-0.490558	0.0712587	-6.88419	5.81186e-12	1.62851e-10	usp14
ENSDARG00000008026	1398.24	-0.588518	0.0855113	-6.88235	5.88733e-12	1.64685e-10	fam129bb
ENSDARG00000092290	4696.83	-0.496059	0.0720853	-6.88156	5.92026e-12	1.65324e-10	si:dkeyp-26a9.2
ENSDARG00000076055	118.891	-1.39774	0.203155	-6.88015	5.97891e-12	1.66677e-10	rpgrip1
ENSDARG00000036670	2912.19	0.544012	0.0791191	6.87586	6.16171e-12	1.71482e-10	aplnrb
ENSDARG00000037528	679.706	-0.790254	0.114993	-6.87219	6.32233e-12	1.75654e-10	si:ch211-191a24.4
ENSDARG00000054723	836.981	0.796696	0.115959	6.87049	6.39838e-12	1.77466e-10	si:ch211-242b18.1
ENSDARG00000100206	134.941	-1.33952	0.195221	-6.86155	6.8119e-12	1.88616e-10	klhdc4
ENSDARG00000029600	1430.78	0.495	0.0722083	6.85516	7.12331e-12	1.96906e-10	wdr32
ENSDARG00000024229	268.365	-1.01235	0.147875	-6.84594	7.59768e-12	2.09665e-10	ubl7a
ENSDARG00000019715	487.459	0.73573	0.107475	6.8456	7.61557e-12	2.09806e-10	metap1d
ENSDARG00000077073	2315.89	0.666146	0.0973143	6.8453	7.63154e-12	2.09893e-10	tanc1a
ENSDARG00000057465	871.58	0.626074	0.0915008	6.84228	7.79436e-12	2.14012e-10	gfpt1
ENSDARG00000090301	1474.43	-0.540811	0.0790901	-6.83791	8.03574e-12	2.20271e-10	usp48
ENSDARG00000100624	571.12	0.690754	0.1011	6.83242	8.34961e-12	2.28492e-10	CABZ01066312.1
ENSDARG00000104222	1911.18	0.46463	0.0680269	6.8301	8.4857e-12	2.31829e-10	inppl1a
ENSDARG00000057940	10880.7	0.346005	0.050689	6.82604	8.72934e-12	2.38089e-10	dido1
ENSDARG00000031775	2071.71	0.519773	0.0761749	6.82342	8.88977e-12	2.42062e-10	ube2s
ENSDARG00000102717	816.169	-0.718111	0.105305	-6.81937	9.14437e-12	2.48581e-10	tmem42a
ENSDARG00000024954	103.01	-1.50621	0.220894	-6.81868	9.18835e-12	2.49363e-10	tmed4
ENSDARG00000052633	128.738	1.42064	0.208408	6.81661	9.32165e-12	2.52563e-10	si:ch211-106n13.3
ENSDARG00000061235	1762.58	-0.596361	0.0875822	-6.80915	9.81737e-12	2.65555e-10	alg5
ENSDARG00000013443	2351.57	0.453851	0.0667041	6.80394	1.01793e-11	2.74891e-10	atp6v1ba
ENSDARG00000062794	4839.48	-0.475713	0.0699397	-6.80176	1.0335e-11	2.78638e-10	trim36
ENSDARG00000000183	2585.77	-0.700924	0.103126	-6.7968	1.0697e-11	2.87923e-10	ptpn4b
ENSDARG00000090820	907.785	-0.73193	0.107721	-6.79466	1.08571e-11	2.91754e-10	slc2a10
ENSDARG00000040033	2501.96	0.46401	0.0683324	6.79049	1.11755e-11	2.99818e-10	trmt11
ENSDARG00000021032	575.888	0.948857	0.139741	6.7901	1.12058e-11	3.00141e-10	foxd3
ENSDARG00000061100	3168.35	0.408223	0.0601504	6.7867	1.14726e-11	3.06786e-10	nars
ENSDARG00000012468	1647.5	-0.494159	0.0728624	-6.78208	1.18462e-11	3.16258e-10	aacs
ENSDARG00000035781	1674.64	-0.634355	0.093551	-6.78085	1.19472e-11	3.18436e-10	ctdnep1b
ENSDARG00000018854	2077.1	-0.554012	0.081826	-6.77061	1.28242e-11	3.41257e-10	scaf4b
ENSDARG00000002215	2322.46	0.450344	0.0665722	6.76474	1.33546e-11	3.54795e-10	rtca
ENSDARG00000031681	585.731	0.790045	0.116876	6.75969	1.38291e-11	3.66806e-10	atp6v0b
ENSDARG00000073792	276.704	-1.24472	0.184157	-6.75903	1.38922e-11	3.67885e-10	man1b1a
ENSDARG00000063079	2926.75	-0.474035	0.0702668	-6.74621	1.51753e-11	4.01215e-10	ago3b
ENSDARG00000036831	1162.1	0.530815	0.0788969	6.72796	1.72057e-11	4.54164e-10	rnf41
ENSDARG00000045605	3841.24	-0.491804	0.073105	-6.72737	1.72762e-11	4.55291e-10	ticrr
ENSDARG00000005462	5888.92	0.385642	0.0573717	6.72181	1.79485e-11	4.71721e-10	kif4
ENSDARG00000028715	1236.08	-0.560353	0.0833643	-6.72174	1.79572e-11	4.71721e-10	mindy3
ENSDARG00000008573	579.965	-0.66466	0.0990488	-6.71043	1.9405e-11	5.08938e-10	fam20b
ENSDARG00000078911	1409.33	0.479951	0.0715277	6.71	1.94627e-11	5.09638e-10	zgc:163098
ENSDARG00000038802	764.908	-0.674789	0.100623	-6.70608	1.99921e-11	5.22665e-10	cenpl
ENSDARG00000069977	642.273	-0.979733	0.146179	-6.70228	2.05198e-11	5.35606e-10	myg1
ENSDARG00000074365	87.5719	-1.80393	0.269296	-6.69871	2.10275e-11	5.47984e-10	zgc:171901
ENSDARG00000021201	487.365	1.15961	0.173274	6.69236	2.19605e-11	5.7139e-10	noto
ENSDARG00000059858	64.1564	3.00485	0.449822	6.68009	2.38797e-11	6.20342e-10	pappab
ENSDARG00000040614	6851.86	-0.418145	0.0626187	-6.67764	2.42829e-11	6.29818e-10	sestd1
ENSDARG00000036592	2630.73	-0.469816	0.0703787	-6.67554	2.46317e-11	6.37855e-10	setd4
ENSDARG00000004173	7221.67	0.375139	0.0562141	6.67339	2.49962e-11	6.45256e-10	copa
ENSDARG00000053463	274.548	-0.892544	0.133745	-6.67347	2.49832e-11	6.45256e-10	poglut1
ENSDARG00000087247	269.282	0.945855	0.14189	6.66613	2.62644e-11	6.76929e-10	kcnab2a
ENSDARG00000061411	3090.55	0.458788	0.0688824	6.66046	2.72967e-11	7.02428e-10	nelfa
ENSDARG00000059654	4807.25	0.396233	0.0595753	6.65097	2.91166e-11	7.48086e-10	eif3ba
ENSDARG00000092115	23815.2	0.395252	0.0594519	6.64826	2.96568e-11	7.60774e-10	eif4a1a
ENSDARG00000096489	8498.58	0.457323	0.0689358	6.63403	3.26633e-11	8.36589e-10	BX248324.1
ENSDARG00000100788	531.917	0.779464	0.117577	6.6294	3.37065e-11	8.61961e-10	trip10b
ENSDARG00000019360	2288.38	0.418051	0.0630753	6.6278	3.40728e-11	8.69972e-10	sec23b
ENSDARG00000086104	311.122	-0.88484	0.133612	-6.62244	3.53316e-11	9.00709e-10	slco5a1b
ENSDARG00000043021	864.817	-0.726782	0.109799	-6.61918	3.61206e-11	9.17966e-10	slc26a11
ENSDARG00000061590	7198.33	-0.590912	0.0892712	-6.61929	3.60929e-11	9.17966e-10	cachd1
ENSDARG00000007691	2629.1	0.401205	0.0606378	6.61643	3.67987e-11	9.33752e-10	cul1b
ENSDARG00000043431	919.722	0.577895	0.08741	6.61132	3.80912e-11	9.65055e-10	b3gntl1
ENSDARG00000036994	2697.27	0.579557	0.087706	6.60795	3.89673e-11	9.85727e-10	tbc1d16
ENSDARG00000101507	2192.98	0.4436	0.0671633	6.6048	3.98052e-11	1.00537e-09	ATG2A
ENSDARG00000061789	1038.09	-0.643292	0.0974041	-6.60436	3.99234e-11	1.00681e-09	gnl1
ENSDARG00000054063	2791.94	-0.449568	0.0681096	-6.60066	4.09344e-11	1.03072e-09	arpc4
ENSDARG00000002403	5286.99	0.397134	0.0601685	6.60036	4.10159e-11	1.03118e-09	nusap1
ENSDARG00000030022	7123.43	0.357742	0.0543009	6.58814	4.45371e-11	1.118e-09	nup188
ENSDARG00000001767	311.599	-0.954785	0.145209	-6.57524	4.85744e-11	1.21748e-09	slc29a2
ENSDARG00000040350	1906.31	-0.491672	0.0749003	-6.56435	5.22608e-11	1.30788e-09	rpp38
ENSDARG00000026224	4079.43	-0.681551	0.103834	-6.56384	5.24403e-11	1.31037e-09	fanci
ENSDARG00000026766	1355.76	-0.537836	0.0821551	-6.54658	5.88677e-11	1.46874e-09	bcl2l10
ENSDARG00000057683	169.864	-1.28743	0.196763	-6.54308	6.0266e-11	1.50134e-09	mcm6
ENSDARG00000109510	3418.26	0.457298	0.0699493	6.53756	6.25324e-11	1.55543e-09	lsm12b
ENSDARG00000098646	121.952	-1.27983	0.195803	-6.53628	6.30681e-11	1.56638e-09	mthfd2
ENSDARG00000017311	2453.7	-0.568463	0.0870176	-6.53274	6.45777e-11	1.60145e-09	gpsm2
ENSDARG00000004636	4815.84	-0.490659	0.0751673	-6.52756	6.68494e-11	1.65528e-09	ccdc9
ENSDARG00000035400	1339.27	-0.58631	0.0898296	-6.5269	6.71427e-11	1.66003e-09	btf3
ENSDARG00000093176	2995.75	-0.55388	0.0848642	-6.52666	6.72515e-11	1.66022e-09	zgc:77118
ENSDARG00000078966	1595.1	0.639268	0.0980288	6.52123	6.97325e-11	1.71888e-09	rbm15b
ENSDARG00000077119	1180.89	-0.568851	0.0872395	-6.52056	7.00445e-11	1.72398e-09	naxd
ENSDARG00000020606	132.619	1.24564	0.191154	6.51642	7.20058e-11	1.76959e-09	nfe2
ENSDARG00000031929	2501.3	-0.559796	0.0859156	-6.51565	7.23773e-11	1.77606e-09	stard14
ENSDARG00000008255	14747.9	0.413887	0.0636538	6.50216	7.91733e-11	1.93992e-09	cnot6a
ENSDARG00000091678	2357.61	-0.491876	0.0756953	-6.4981	8.13431e-11	1.98802e-09	ints12
ENSDARG00000098897	5788.95	0.531195	0.081747	6.49803	8.13787e-11	1.98802e-09	pds5b
ENSDARG00000056005	2352.53	-0.423346	0.0651634	-6.49668	8.21126e-11	2.00296e-09	dnajc18
ENSDARG00000007385	7771	0.383435	0.0590263	6.496	8.24825e-11	2.00899e-09	cct7
ENSDARG00000091293	374.022	0.818669	0.12609	6.49275	8.42843e-11	2.04983e-09	dmxl2
ENSDARG00000016173	2250.02	-0.468346	0.0721375	-6.4924	8.44774e-11	2.05149e-09	cct3
ENSDARG00000006494	2195.34	0.516105	0.0795238	6.48995	8.58641e-11	2.08208e-09	asb7
ENSDARG00000068246	1995.89	0.49761	0.0767176	6.48625	8.79983e-11	2.13068e-09	plcb3
ENSDARG00000069744	664.468	0.604146	0.0932008	6.4822	9.03932e-11	2.18543e-09	mos
ENSDARG00000004904	641.346	-0.777304	0.11995	-6.48023	9.15812e-11	2.2109e-09	gys2
ENSDARG00000000796	2618.35	-0.42224	0.0651812	-6.47795	9.29791e-11	2.24134e-09	nr4a1
ENSDARG00000042877	494.051	-0.843155	0.13021	-6.47534	9.45992e-11	2.27705e-09	heca
ENSDARG00000030949	2009.88	0.691249	0.106792	6.47283	9.61868e-11	2.30848e-09	srprb
ENSDARG00000070470	4829.94	0.486644	0.0751805	6.47302	9.60655e-11	2.30848e-09	sh3rf1
ENSDARG00000008986	72.9112	-1.77004	0.273743	-6.46605	1.00598e-10	2.41082e-09	e2f7
ENSDARG00000036791	4258.13	0.44842	0.0693969	6.46167	1.03552e-10	2.47799e-09	dnmt3bb.1
ENSDARG00000003570	8538.42	0.36546	0.056575	6.45975	1.04876e-10	2.50602e-09	hsp90b1
ENSDARG00000069745	3244.4	-0.412914	0.0639291	-6.45894	1.05436e-10	2.51574e-09	slc35f2
ENSDARG00000019556	1983.01	-0.45609	0.0706553	-6.45514	1.08116e-10	2.57593e-09	clcn7
ENSDARG00000025566	4762.17	0.44325	0.0686738	6.45443	1.0863e-10	2.58441e-09	slc25a3b
ENSDARG00000044059	307.075	0.932103	0.144437	6.45335	1.09406e-10	2.59909e-09	lft2
ENSDARG00000021059	5526.25	0.590178	0.0915179	6.44877	1.12762e-10	2.67495e-09	alas1
ENSDARG00000052712	865.334	0.534867	0.0829708	6.44644	1.14507e-10	2.71244e-09	suclg1
ENSDARG00000063446	333.358	0.841225	0.130502	6.44609	1.14772e-10	2.71478e-09	iba57
ENSDARG00000041689	1032.96	0.551242	0.08567	6.43448	1.23899e-10	2.92643e-09	usf1
ENSDARG00000068143	6225.57	0.347238	0.0539723	6.43363	1.2459e-10	2.93853e-09	slc39a6
ENSDARG00000042644	973.099	-0.537423	0.0835448	-6.43276	1.2531e-10	2.95126e-09	sod2
ENSDARG00000008200	3090.2	0.404405	0.0628938	6.42997	1.27629e-10	3.00158e-09	ugp2b
ENSDARG00000077456	158.164	1.14339	0.177882	6.42783	1.29442e-10	3.03984e-09	si:ch211-113a14.12
ENSDARG00000073847	3109.17	0.473829	0.0738031	6.42017	1.36118e-10	3.19206e-09	rbm15
ENSDARG00000017235	6275.53	0.34727	0.0541152	6.41723	1.38772e-10	3.24964e-09	eif5a
ENSDARG00000103799	2581.64	-0.404715	0.0631514	-6.40864	1.46822e-10	3.43324e-09	kars
ENSDARG00000102987	1700.72	-0.47188	0.073677	-6.40471	1.50658e-10	3.51793e-09	capn7
ENSDARG00000103665	1732.98	0.467362	0.0729855	6.40349	1.51862e-10	3.54099e-09	brpf1
ENSDARG00000086457	1282.15	-0.689159	0.107658	-6.40137	1.53988e-10	3.58548e-09	tnfaip8l1
ENSDARG00000036345	1244.26	-0.577601	0.0903059	-6.39605	1.59451e-10	3.7074e-09	cmtr2
ENSDARG00000086112	6484.35	-0.473839	0.0741461	-6.39061	1.65225e-10	3.83621e-09	si:ch211-266i6.3
ENSDARG00000004806	2231.68	0.42474	0.0665105	6.38606	1.70215e-10	3.94649e-09	grwd1
ENSDARG00000103117	2236.06	-0.621641	0.0973681	-6.38444	1.72027e-10	3.98286e-09	tmprss4a
ENSDARG00000070512	2098.52	0.50218	0.0786766	6.38284	1.73834e-10	4.01903e-09	cnpy3
ENSDARG00000002546	2380.7	0.484067	0.0758725	6.38001	1.77074e-10	4.0824e-09	rundc3ab
ENSDARG00000058369	1584.9	0.608545	0.0953828	6.38003	1.77058e-10	4.0824e-09	mex3b
ENSDARG00000015998	3492.62	-0.39668	0.0623585	-6.36127	2.00086e-10	4.60648e-09	wdhd1
ENSDARG00000022904	104.939	-1.3393	0.21068	-6.35703	2.05691e-10	4.72886e-09	skilb
ENSDARG00000070957	927.284	0.521381	0.0820671	6.3531	2.11014e-10	4.84446e-09	im:7160594
ENSDARG00000056862	736.967	-0.688501	0.108451	-6.34849	2.17434e-10	4.98486e-09	cep63
ENSDARG00000037739	12546.8	-0.456748	0.071951	-6.34805	2.18065e-10	4.99235e-09	zgc:112980
ENSDARG00000102846	1731.43	-0.554929	0.0874763	-6.34376	2.24222e-10	5.12614e-09	trmt13
ENSDARG00000089791	1426.08	0.561619	0.0885534	6.34214	2.26589e-10	5.17305e-09	slc25a32a
ENSDARG00000054749	891.959	-0.552275	0.0871692	-6.33567	2.36309e-10	5.38745e-09	lmo4b
ENSDARG00000004311	359.315	0.762398	0.120339	6.33542	2.36697e-10	5.38881e-09	ldlrap1a
ENSDARG00000058022	721.82	-0.575984	0.0909446	-6.33335	2.39898e-10	5.45409e-09	ormdl2
ENSDARG00000062268	738.924	0.581118	0.0918096	6.3296	2.45803e-10	5.58062e-09	jarid2b
ENSDARG00000096578	384.395	0.764891	0.120882	6.32759	2.49025e-10	5.64595e-09	cul4a
ENSDARG00000018524	1774.59	-0.461525	0.0729505	-6.32655	2.50701e-10	5.6761e-09	midn
ENSDARG00000051886	5075.24	0.375513	0.0594193	6.31972	2.6203e-10	5.92184e-09	ankrd11
ENSDARG00000058480	3191.75	0.407289	0.0644488	6.31958	2.62278e-10	5.92184e-09	chtf18
ENSDARG00000075013	1228.77	-0.591308	0.0935827	-6.31856	2.64005e-10	5.95264e-09	usp45
ENSDARG00000025467	2207.68	0.45206	0.0715537	6.31777	2.65359e-10	5.96676e-09	aatf
ENSDARG00000109442	382.244	-0.727424	0.115135	-6.31798	2.64997e-10	5.96676e-09	FO704676.1
ENSDARG00000116752	1293.52	-0.682543	0.108064	-6.31609	2.68261e-10	6.02375e-09	CR936300.2
ENSDARG00000100528	3980.95	-0.453365	0.071797	-6.31455	2.70955e-10	6.0759e-09	map1lc3c
ENSDARG00000009505	1370.02	-0.512038	0.08112	-6.3121	2.75271e-10	6.16426e-09	prelid3b
ENSDARG00000035390	3448.14	0.4042	0.0640467	6.31102	2.772e-10	6.19899e-09	tnpo1
ENSDARG00000035549	295.459	-0.816749	0.12943	-6.31035	2.78408e-10	6.21753e-09	uprt
ENSDARG00000002336	202.445	0.959821	0.152146	6.30854	2.81681e-10	6.28205e-09	dlc
ENSDARG00000092887	185.071	-1.22233	0.19383	-6.3062	2.85973e-10	6.36912e-09	si:dkeyp-46h3.3
ENSDARG00000071031	5224.35	-0.383857	0.0608937	-6.30373	2.90566e-10	6.46263e-09	snx1a
ENSDARG00000059936	679.652	0.582556	0.0925435	6.29495	3.07499e-10	6.82997e-09	herc4
ENSDARG00000105206	2152.46	-0.481415	0.0764931	-6.29357	3.10247e-10	6.8817e-09	hmgcrb
ENSDARG00000042147	3088.43	0.396275	0.0630556	6.28453	3.28854e-10	7.28455e-09	rbbp5
ENSDARG00000058605	2294.29	0.391462	0.062303	6.2832	3.31679e-10	7.33723e-09	vsig10
ENSDARG00000010411	1375.92	0.481346	0.0766189	6.28233	3.3353e-10	7.36823e-09	epn1
ENSDARG00000055054	554.228	-0.644107	0.102536	-6.28174	3.34805e-10	7.38644e-09	bcl9l
ENSDARG00000036700	987.233	0.679845	0.108244	6.28065	3.37154e-10	7.41829e-09	si:ch211-114n24.6
ENSDARG00000057374	1084.99	-0.50746	0.0807963	-6.28073	3.36986e-10	7.41829e-09	sfxn3
ENSDARG00000032114	1606.76	0.457404	0.0729159	6.27303	3.5408e-10	7.78026e-09	slain2
ENSDARG00000036915	474.403	-0.665731	0.106156	-6.27123	3.58213e-10	7.85004e-09	dolpp1
ENSDARG00000052721	1312.03	-0.452019	0.0720774	-6.2713	3.58054e-10	7.85004e-09	prim2
ENSDARG00000104103	1223.21	0.527583	0.0841462	6.26985	3.61405e-10	7.90941e-09	rps6kc1
ENSDARG00000006566	3266.48	0.430461	0.0686895	6.26676	3.68638e-10	8.05695e-09	nlk1
ENSDARG00000007323	909.271	-0.526832	0.0840755	-6.26617	3.7003e-10	8.07661e-09	chmp4bb
ENSDARG00000087538	1257.55	-0.497674	0.0794364	-6.26506	3.72674e-10	8.12351e-09	kif3a
ENSDARG00000098359	4065.87	0.460263	0.0734914	6.26281	3.781e-10	8.23082e-09	il17rd
ENSDARG00000060484	734.724	0.583813	0.0932405	6.26136	3.81629e-10	8.29663e-09	selenoi
ENSDARG00000032458	2483.88	0.520762	0.0832016	6.25904	3.87366e-10	8.4102e-09	mark2b
ENSDARG00000111091	1764.48	-0.491871	0.0786528	-6.2537	4.00845e-10	8.69134e-09	CCDC69
ENSDARG00000087749	4183.79	-0.425602	0.0680655	-6.25283	4.0308e-10	8.72826e-09	ccser2a
ENSDARG00000098375	3340.41	0.407452	0.0651656	6.25257	4.03761e-10	8.73146e-09	polr1a
ENSDARG00000004171	3178.11	-0.534472	0.0854945	-6.25154	4.06434e-10	8.77769e-09	rabac1
ENSDARG00000017093	2903.41	-0.479614	0.0767462	-6.24936	4.12143e-10	8.88928e-09	emc8
ENSDARG00000070914	1230.48	0.631775	0.101136	6.24681	4.18909e-10	9.02334e-09	dusp6
ENSDARG00000045910	433.458	0.715776	0.11466	6.24259	4.30387e-10	9.2584e-09	tmem181
ENSDARG00000004692	1464.17	-0.518305	0.083053	-6.24066	4.35735e-10	9.36116e-09	nabp1a
ENSDARG00000102279	104.31	1.39976	0.224868	6.22482	4.82121e-10	1.03442e-08	zmiz1b
ENSDARG00000078401	1273.86	0.509828	0.0819245	6.22314	4.87303e-10	1.04417e-08	larp4aa
ENSDARG00000041182	5701.46	0.388436	0.0624266	6.22229	4.89944e-10	1.04845e-08	rpl4
ENSDARG00000077372	949.116	0.508228	0.0817027	6.22045	4.95727e-10	1.05945e-08	tfr1b
ENSDARG00000070568	13272.8	0.32743	0.0526967	6.21349	5.18209e-10	1.10605e-08	atad5a
ENSDARG00000086618	709.326	-0.629956	0.101398	-6.21269	5.20852e-10	1.11025e-08	psma3
ENSDARG00000097253	679.722	0.684508	0.110183	6.21245	5.21641e-10	1.11049e-08	yeats2
ENSDARG00000074868	382.641	-0.732757	0.117958	-6.21202	5.23081e-10	1.11211e-08	AL929017.1
ENSDARG00000098135	1684.22	0.48208	0.0776213	6.21066	5.27629e-10	1.12032e-08	stk40
ENSDARG00000036232	7876.51	0.418251	0.0673595	6.20924	5.3243e-10	1.12905e-08	trpm7
ENSDARG00000103830	923.948	0.533766	0.0859826	6.20784	5.37187e-10	1.13767e-08	ddr2l
ENSDARG00000031776	4741.3	-0.376897	0.0607233	-6.20679	5.40775e-10	1.14379e-08	zgc:92066
ENSDARG00000053058	1576.06	0.454118	0.0731778	6.20569	5.44575e-10	1.15035e-08	rps11
ENSDARG00000098171	84.4275	1.90524	0.307164	6.2027	5.55042e-10	1.17095e-08	zgc:162193
ENSDARG00000079329	4125.2	-0.498692	0.0804432	-6.19931	5.67125e-10	1.1949e-08	cop1
ENSDARG00000056561	1387.91	-1.32948	0.214733	-6.19134	5.96532e-10	1.25524e-08	asb11
ENSDARG00000058342	159.391	-1.12547	0.181825	-6.18985	6.02206e-10	1.26556e-08	grhl2a
ENSDARG00000104066	14020.1	0.340246	0.0550256	6.18341	6.27308e-10	1.31662e-08	dnaja2
ENSDARG00000074381	1693.92	0.497544	0.0804703	6.18295	6.29132e-10	1.31876e-08	farp1
ENSDARG00000061710	70.7618	-1.62784	0.263328	-6.18178	6.33818e-10	1.32689e-08	map3k8
ENSDARG00000068814	204.512	1.04872	0.169842	6.17466	6.63065e-10	1.38635e-08	spata2l
ENSDARG00000070455	293.324	-0.884822	0.143338	-6.17296	6.70244e-10	1.39957e-08	tmem245
ENSDARG00000052957	287.818	1.12082	0.181579	6.1726	6.71745e-10	1.40092e-08	plcd3a
ENSDARG00000017741	19218.6	0.348886	0.0565935	6.16477	7.0586e-10	1.46833e-08	g3bp1
ENSDARG00000063100	2226.5	0.396981	0.0643935	6.16492	7.05174e-10	1.46833e-08	psmd14
ENSDARG00000098652	174.791	-1.08318	0.175966	-6.15559	7.47986e-10	1.55399e-08	pcdh11
ENSDARG00000059035	3274.73	-0.466647	0.0758328	-6.15363	7.57304e-10	1.57136e-08	porb
ENSDARG00000035719	742.711	-0.54838	0.0891436	-6.15165	7.66825e-10	1.5891e-08	arl5c
ENSDARG00000060004	1057.11	0.72609	0.118038	6.1513	7.68489e-10	1.59054e-08	fzd7a
ENSDARG00000032237	1826.62	-0.49958	0.0812869	-6.14588	7.95228e-10	1.64381e-08	anapc4
ENSDARG00000036820	29.694	-2.77597	0.451856	-6.14348	8.07344e-10	1.66465e-08	mgll
ENSDARG00000039684	436.927	0.788042	0.128269	6.14366	8.06408e-10	1.66465e-08	sirt5
ENSDARG00000025174	5673.73	0.440108	0.0716505	6.14243	8.12695e-10	1.67151e-08	zgc:103482
ENSDARG00000075624	609.619	-0.687494	0.111925	-6.14243	8.1271e-10	1.67151e-08	bend5
ENSDARG00000074558	122.4	-1.29774	0.211639	-6.13188	8.68462e-10	1.78394e-08	cntnap2b
ENSDARG00000054213	10159	0.363379	0.0592752	6.13037	8.76764e-10	1.79874e-08	hectd1
ENSDARG00000103108	2993.91	0.3672	0.0599029	6.12992	8.79224e-10	1.80153e-08	acvr2bb
ENSDARG00000036291	589.73	0.629349	0.102672	6.12969	8.80524e-10	1.80194e-08	nucb2b
ENSDARG00000039269	256.15	-0.965177	0.157757	-6.11811	9.46937e-10	1.93544e-08	arg2
ENSDARG00000073837	4057.5	0.361282	0.0590543	6.1178	9.48749e-10	1.93672e-08	senp2
ENSDARG00000006567	247.877	-0.852524	0.139364	-6.11727	9.51939e-10	1.94082e-08	dus4l
ENSDARG00000013009	333.358	0.773514	0.126499	6.11477	9.66947e-10	1.96897e-08	ubiad1
ENSDARG00000044327	488.399	-0.795931	0.130265	-6.11007	9.95865e-10	2.02534e-08	tmem185
ENSDARG00000004078	2470.74	0.412335	0.0675085	6.1079	1.00952e-09	2.05056e-08	acsl4a
ENSDARG00000042667	1430.68	0.49687	0.0814082	6.10344	1.03808e-09	2.10597e-08	klf2a
ENSDARG00000098079	711.23	0.565064	0.0925855	6.10316	1.03994e-09	2.10714e-08	rab3gap1
ENSDARG00000102055	2090.25	0.490723	0.0804901	6.09668	1.08291e-09	2.19149e-08	hadhb
ENSDARG00000044402	1047.88	0.492071	0.0808787	6.08407	1.17172e-09	2.36828e-08	nop16
ENSDARG00000093129	716.106	-0.590616	0.0971713	-6.07809	1.2162e-09	2.45516e-08	si:rp71-45k5.2
ENSDARG00000017901	4560.9	0.363717	0.0598486	6.07728	1.22238e-09	2.46461e-08	tln2a
ENSDARG00000052606	2884.24	-0.583721	0.0961943	-6.06815	1.29392e-09	2.60447e-08	dpp9
ENSDARG00000062695	238.925	-0.902988	0.14882	-6.06763	1.29811e-09	2.60447e-08	ccdc126
ENSDARG00000102810	283.351	0.791219	0.130396	6.06784	1.29643e-09	2.60447e-08	samd1a
ENSDARG00000113820	236.598	1.06747	0.175926	6.06774	1.29721e-09	2.60447e-08	cyp46a1.4
ENSDARG00000098935	1093.47	0.564888	0.0931163	6.06647	1.30748e-09	2.62008e-08	bxdc2
ENSDARG00000018077	438.286	0.707371	0.116725	6.06017	1.35982e-09	2.72163e-08	rbp1
ENSDARG00000069118	931.107	0.633749	0.104612	6.0581	1.37735e-09	2.75336e-08	ppp2r5eb
ENSDARG00000038898	368.18	-0.801142	0.132364	-6.05257	1.42554e-09	2.84622e-08	zgc:113691
ENSDARG00000036774	746.739	-0.557646	0.0922978	-6.04182	1.52386e-09	3.03882e-08	rgs12b
ENSDARG00000021938	2351.02	-0.409524	0.0678101	-6.03928	1.54805e-09	3.07584e-08	alg5
ENSDARG00000057138	512.749	0.618558	0.102422	6.03932	1.54768e-09	3.07584e-08	zgc:174164
ENSDARG00000071426	2428.7	0.477326	0.0790328	6.03959	1.54506e-09	3.07584e-08	lrrc59
ENSDARG00000028431	716.467	0.580211	0.09611	6.03695	1.57055e-09	3.11677e-08	adnp2b
ENSDARG00000068894	8437.29	0.329712	0.0546726	6.03066	1.63291e-09	3.2366e-08	nrip1b
ENSDARG00000009212	10701.6	0.366894	0.0608604	6.02845	1.65543e-09	3.27727e-08	ppiaa
ENSDARG00000099967	482.049	0.718389	0.119222	6.02563	1.68456e-09	3.33092e-08	CU929143.1
ENSDARG00000027249	1299.76	0.557409	0.0925248	6.02443	1.69708e-09	3.35162e-08	btg1
ENSDARG00000102389	410.835	0.905377	0.150289	6.02422	1.69926e-09	3.3519e-08	ved
ENSDARG00000062511	3724.84	0.474845	0.0788395	6.02294	1.71276e-09	3.37446e-08	golga3
ENSDARG00000000189	939.063	0.55407	0.0921235	6.01443	1.80526e-09	3.55243e-08	sema6e
ENSDARG00000055899	491.839	-0.639212	0.106325	-6.01186	1.83408e-09	3.60482e-08	lzic
ENSDARG00000053713	2263.11	-0.409436	0.0681118	-6.01124	1.84113e-09	3.61435e-08	ccdc88c
ENSDARG00000088331	1477.6	-0.548863	0.0913309	-6.00961	1.8597e-09	3.64209e-08	znf1028
ENSDARG00000092746	657.943	-0.821044	0.136618	-6.00977	1.85786e-09	3.64209e-08	si:ch211-150o23.2
ENSDARG00000002507	424.829	0.667489	0.111107	6.00761	1.88277e-09	3.68285e-08	itga10
ENSDARG00000052178	378.297	0.71314	0.118724	6.00671	1.89331e-09	3.69905e-08	eif2s1b
ENSDARG00000032155	2667.07	0.375609	0.0625593	6.00405	1.92456e-09	3.75117e-08	ppm1aa
ENSDARG00000054864	8536.18	0.353944	0.0589492	6.00423	1.92245e-09	3.75117e-08	aplp2
ENSDARG00000052304	1425.8	0.432357	0.0721144	5.99543	2.02949e-09	3.95101e-08	uqcrc1
ENSDARG00000019280	595.237	0.578572	0.0965983	5.98946	2.1054e-09	4.09391e-08	larsb
ENSDARG00000074715	383.406	0.698589	0.116713	5.98554	2.15678e-09	4.18886e-08	stk17a
ENSDARG00000036061	548.506	0.608431	0.101847	5.97396	2.31563e-09	4.49205e-08	ogfod1
ENSDARG00000060600	3467.46	0.465187	0.0779302	5.96928	2.38301e-09	4.6173e-08	capn15
ENSDARG00000022813	2106.42	0.541653	0.0907565	5.9682	2.39879e-09	4.64238e-08	dnd1
ENSDARG00000010571	2662.85	0.367109	0.0615139	5.9679	2.40321e-09	4.64545e-08	ezh2
ENSDARG00000086712	2113.63	0.496603	0.0832539	5.96493	2.44743e-09	4.72536e-08	si:dkeyp-97b10.3
ENSDARG00000078430	860.174	0.572508	0.096018	5.9625	2.484e-09	4.79033e-08	tiam1a
ENSDARG00000034768	5420.51	0.346515	0.0581237	5.96169	2.49642e-09	4.80861e-08	phf3
ENSDARG00000089355	1874.71	0.399633	0.0670444	5.96072	2.51128e-09	4.83156e-08	si:dkeyp-121d4.3
ENSDARG00000061948	43.9233	-2.19395	0.368434	-5.9548	2.60393e-09	5.00393e-08	amotl2b
ENSDARG00000045200	791.406	0.636957	0.10704	5.95063	2.67113e-09	5.12707e-08	dusp19b
ENSDARG00000035650	2281.48	-0.421056	0.0708011	-5.94703	2.73049e-09	5.23487e-08	evla
ENSDARG00000008434	1179.32	-0.490006	0.0824058	-5.94626	2.74345e-09	5.25359e-08	bcl2l1
ENSDARG00000020077	2206.41	0.438878	0.0738337	5.94414	2.77911e-09	5.31566e-08	nol10
ENSDARG00000107506	256.296	-1.09618	0.184648	-5.93659	2.91013e-09	5.55978e-08	CR356227.2
ENSDARG00000008835	618.614	0.925555	0.156034	5.93174	2.9975e-09	5.72003e-08	si:dkey-46g23.5
ENSDARG00000035573	125.022	-1.58268	0.267079	-5.92588	3.10634e-09	5.92083e-08	zgc:86811
ENSDARG00000036055	953.677	0.504119	0.0850959	5.92413	3.13959e-09	5.97724e-08	thap11
ENSDARG00000045482	1512.51	-0.458914	0.0774759	-5.92331	3.1553e-09	6.0002e-08	stk38l
ENSDARG00000100825	854.368	0.536362	0.0907801	5.90837	3.45518e-09	6.56284e-08	calm3a
ENSDARG00000079823	355.174	0.965589	0.163509	5.90541	3.51764e-09	6.67375e-08	mrps36
ENSDARG00000060350	579.05	0.78605	0.13315	5.90348	3.55904e-09	6.74448e-08	apoda.2
ENSDARG00000058801	4911.54	0.426491	0.0722782	5.90069	3.61976e-09	6.85162e-08	rev3l
ENSDARG00000078941	103.019	1.49103	0.252706	5.90023	3.62993e-09	6.86296e-08	ano9a
ENSDARG00000099545	730.498	-0.557319	0.0944716	-5.89933	3.64985e-09	6.89267e-08	snx25
ENSDARG00000054530	1626.55	0.512121	0.0868241	5.89837	3.67103e-09	6.92468e-08	rars
ENSDARG00000069382	236.387	1.10346	0.187233	5.89355	3.77993e-09	7.12192e-08	mxtx1
ENSDARG00000099283	206.316	1.30271	0.22116	5.89037	3.85327e-09	7.25175e-08	epb41a
ENSDARG00000010332	4693.42	-0.449145	0.0762698	-5.8889	3.8878e-09	7.30835e-08	zgc:56231
ENSDARG00000008735	491.17	0.649736	0.110359	5.88748	3.9214e-09	7.36306e-08	atp6ap2
ENSDARG00000025071	6197.77	0.484518	0.0824235	5.8784	4.14263e-09	7.76956e-08	brd8
ENSDARG00000033999	1533.69	0.486065	0.0826983	5.87757	4.16339e-09	7.79958e-08	cyp26a1
ENSDARG00000079401	612.26	-0.571266	0.0972552	-5.87388	4.25699e-09	7.96582e-08	si:dkey-197c15.6
ENSDARG00000102430	33.3342	2.55406	0.435241	5.86816	4.40664e-09	8.23645e-08	opn6a
ENSDARG00000012485	4392.35	0.343138	0.0585169	5.86393	4.52051e-09	8.43965e-08	aurka
ENSDARG00000006260	6686.49	0.455109	0.0777097	5.85652	4.72661e-09	8.8144e-08	tuba8l4
ENSDARG00000024324	1003.6	0.538241	0.0919221	5.85541	4.75842e-09	8.86364e-08	arhgap1
ENSDARG00000056307	3734.14	-0.37867	0.0647018	-5.85254	4.84108e-09	9.00738e-08	znf706
ENSDARG00000087226	1285.26	-0.446758	0.0763918	-5.84824	4.96788e-09	9.23283e-08	kbtbd2
ENSDARG00000057680	210.818	-0.869541	0.148759	-5.8453	5.0567e-09	9.38725e-08	foxj2
ENSDARG00000059116	387.74	0.733671	0.125582	5.84219	5.15189e-09	9.55313e-08	heatr5b
ENSDARG00000062460	1451.23	-0.54341	0.0931092	-5.83627	5.33838e-09	9.88776e-08	sgk3
ENSDARG00000011553	480.366	0.644442	0.110477	5.83329	5.43446e-09	1.00544e-07	atp5pb
ENSDARG00000043180	84.4506	-1.39184	0.238622	-5.83283	5.44966e-09	1.00711e-07	gpd1b
ENSDARG00000003934	167.947	0.993129	0.17036	5.82959	5.55637e-09	1.02568e-07	nxnl2
ENSDARG00000102586	867.825	0.498533	0.0855679	5.82617	5.67128e-09	1.04571e-07	zgc:152938
ENSDARG00000035095	2490.81	-0.371297	0.0637738	-5.82209	5.81159e-09	1.07038e-07	tdgf1
ENSDARG00000075354	20881.3	0.28436	0.0488458	5.82159	5.82921e-09	1.07242e-07	espl1
ENSDARG00000026871	4402.05	0.489847	0.0841774	5.81922	5.91245e-09	1.08651e-07	uchl1
ENSDARG00000010948	3238.06	0.398772	0.068617	5.81156	6.18915e-09	1.13609e-07	kif11
ENSDARG00000060016	1188.48	0.500173	0.0861421	5.80637	6.38429e-09	1.1706e-07	nsd1a
ENSDARG00000014577	1039.05	0.49927	0.0860194	5.80416	6.46913e-09	1.18483e-07	rhpn2
ENSDARG00000043357	1189.17	0.441115	0.076012	5.80324	6.50472e-09	1.19002e-07	tbl2
ENSDARG00000075625	2160.54	-0.498069	0.0858635	-5.80071	6.60341e-09	1.20672e-07	lrig1
ENSDARG00000043371	2592.18	-0.378989	0.0653796	-5.79676	6.76103e-09	1.23278e-07	mdh2
ENSDARG00000062206	1630.63	0.408977	0.0705522	5.7968	6.75942e-09	1.23278e-07	skiv2l
ENSDARG00000020749	10954	-0.362136	0.0624796	-5.79606	6.78907e-09	1.23652e-07	caprin2
ENSDARG00000037962	987.75	-0.50403	0.0870538	-5.78987	7.04404e-09	1.28153e-07	psmb7
ENSDARG00000001162	8080.95	-0.303463	0.0524265	-5.78836	7.10785e-09	1.29171e-07	matr3l1.1
ENSDARG00000023214	705.219	-0.548912	0.0948609	-5.78649	7.18705e-09	1.30465e-07	mob2a
ENSDARG00000062055	2598.94	0.506253	0.0875468	5.78265	7.3531e-09	1.33332e-07	rnf38
ENSDARG00000105424	3929.84	-0.373473	0.0646835	-5.77386	7.74757e-09	1.40329e-07	si:rp71-46j2.7
ENSDARG00000012140	4907.9	-0.314612	0.0545066	-5.77199	7.83402e-09	1.41739e-07	ccnl1b
ENSDARG00000015385	452.714	-0.61886	0.107227	-5.77149	7.8574e-09	1.41849e-07	ndufs3
ENSDARG00000103754	15820.4	0.360701	0.0624963	5.77156	7.85431e-09	1.41849e-07	aspm
ENSDARG00000016706	1716.78	0.447966	0.0776231	5.77104	7.8783e-09	1.42069e-07	atic
ENSDARG00000074242	8820.62	0.365721	0.0633752	5.77073	7.89289e-09	1.42176e-07	serbp1a
ENSDARG00000057089	1619.82	-0.408713	0.070842	-5.76936	7.95741e-09	1.43181e-07	ftsj1
ENSDARG00000011493	479.563	-0.735948	0.127584	-5.76833	8.00631e-09	1.43903e-07	dcun1d3
ENSDARG00000061732	991.869	-0.471167	0.0816888	-5.76783	8.02968e-09	1.44165e-07	raph1b
ENSDARG00000061778	2915.57	0.342329	0.0593786	5.7652	8.15623e-09	1.46277e-07	fmn2b
ENSDARG00000043548	463.94	0.616603	0.107028	5.76116	8.35356e-09	1.49652e-07	atg4da
ENSDARG00000020948	3453.79	0.411737	0.0716175	5.74912	8.97111e-09	1.6054e-07	gmcl1
ENSDARG00000068415	1657.5	-0.408631	0.0710827	-5.74867	8.99461e-09	1.60785e-07	ptgesl
ENSDARG00000043665	771.439	-0.549061	0.0956288	-5.74158	9.37976e-09	1.67487e-07	glrx5
ENSDARG00000034056	2285.75	0.412357	0.0718853	5.73632	9.67578e-09	1.72585e-07	csnk1g2b
ENSDARG00000032990	1864.34	-0.386147	0.0673308	-5.73507	9.74702e-09	1.73666e-07	plxnb3
ENSDARG00000009208	3376.4	0.361124	0.063	5.73214	9.91738e-09	1.7651e-07	prkcda
ENSDARG00000022232	2597.34	0.380696	0.066434	5.73044	1.00168e-08	1.78085e-07	ppan
ENSDARG00000078751	5570.25	0.377669	0.0659238	5.72888	1.01097e-08	1.79543e-07	tpp2
ENSDARG00000007250	979.105	-0.482611	0.0842522	-5.72817	1.01517e-08	1.80094e-07	use1
ENSDARG00000054583	906.855	-0.582149	0.101662	-5.7263	1.02644e-08	1.81897e-07	mfsd6b
ENSDARG00000101915	41.233	-2.01015	0.351211	-5.72349	1.04358e-08	1.84735e-07	pin1
ENSDARG00000037353	2167.85	-0.600647	0.105026	-5.71906	1.07116e-08	1.89412e-07	frs2b
ENSDARG00000067984	428.31	0.919588	0.160818	5.71818	1.07669e-08	1.90184e-07	gas1b
ENSDARG00000024278	576.016	0.603969	0.105629	5.71785	1.07878e-08	1.90349e-07	adh8b
ENSDARG00000058322	571.397	0.943072	0.164944	5.71754	1.08079e-08	1.90498e-07	enc3
ENSDARG00000045289	1343.38	-0.608805	0.106521	-5.71536	1.09473e-08	1.92747e-07	gpr137c
ENSDARG00000100519	1630.13	-0.544768	0.0953798	-5.71157	1.11941e-08	1.96882e-07	spop
ENSDARG00000087394	238.724	-0.915155	0.160289	-5.70941	1.13367e-08	1.99176e-07	tshz3a
ENSDARG00000038991	1111.09	-0.598391	0.104886	-5.70515	1.16243e-08	2.03792e-07	nsfb
ENSDARG00000041065	2240.25	0.590431	0.103489	5.70528	1.16153e-08	2.03792e-07	hspb1
ENSDARG00000090929	325.529	0.888114	0.155689	5.70442	1.16742e-08	2.04447e-07	si:dkeyp-98a7.4
ENSDARG00000099304	301.43	0.792316	0.138958	5.70186	1.1851e-08	2.07323e-07	si:ch211-51f19.1
ENSDARG00000016753	6492.65	0.293151	0.05142	5.70111	1.19032e-08	2.08014e-07	ipo9
ENSDARG00000077288	2121.72	-0.375081	0.0658246	-5.6982	1.21081e-08	2.11369e-07	si:ch211-188c16.1
ENSDARG00000078113	356.075	-0.792443	0.13909	-5.69732	1.21702e-08	2.12227e-07	atp5mea
ENSDARG00000101602	448.304	0.681752	0.119689	5.69604	1.22621e-08	2.13603e-07	preb
ENSDARG00000052866	6284.61	0.341561	0.0599736	5.69518	1.23243e-08	2.14459e-07	htt
ENSDARG00000055973	256.563	0.874571	0.153589	5.69422	1.2394e-08	2.15443e-07	zar1l
ENSDARG00000057248	1838.48	0.483502	0.0849742	5.68999	1.27047e-08	2.20609e-07	sclt1
ENSDARG00000074671	161.771	1.00273	0.176339	5.68637	1.29771e-08	2.25101e-07	nptx1l
ENSDARG00000097098	1226.11	0.712022	0.125224	5.68598	1.30061e-08	2.25367e-07	znf1004
ENSDARG00000058461	2494.64	-0.510798	0.0898402	-5.68563	1.30334e-08	2.25397e-07	ice1
ENSDARG00000104708	1009.21	0.524151	0.0921892	5.6856	1.30354e-08	2.25397e-07	ddx24
ENSDARG00000019897	375.223	0.69244	0.121915	5.67969	1.34935e-08	2.33072e-07	gpat4
ENSDARG00000042056	2173.8	0.381137	0.0671473	5.67613	1.37778e-08	2.37732e-07	mau2
ENSDARG00000104831	8764.06	0.296031	0.0521924	5.67193	1.41198e-08	2.43377e-07	si:rp71-15i12.1
ENSDARG00000054501	1240.51	-0.51246	0.0903614	-5.67123	1.41779e-08	2.44123e-07	stambpa
ENSDARG00000104390	338.474	-0.862588	0.152116	-5.67061	1.42289e-08	2.44742e-07	sumo2a
ENSDARG00000075435	1493.18	-0.501697	0.0884785	-5.67027	1.42573e-08	2.44975e-07	akap11
ENSDARG00000100374	7598.44	-0.346809	0.0611663	-5.66993	1.42857e-08	2.45205e-07	txnrd3
ENSDARG00000008292	3239	0.33801	0.0596329	5.66817	1.44331e-08	2.47218e-07	eif2s3
ENSDARG00000021149	779.48	-0.530769	0.0936394	-5.66823	1.44284e-08	2.47218e-07	cbr1l
ENSDARG00000052565	4476.43	0.311189	0.055044	5.65346	1.57249e-08	2.69063e-07	cenpi
ENSDARG00000039020	1898.6	0.436532	0.0772331	5.65214	1.58466e-08	2.70863e-07	fbxo5
ENSDARG00000101624	3350.91	0.353807	0.0626187	5.65019	1.60273e-08	2.73667e-07	lmnb2
ENSDARG00000042527	1173.98	0.470737	0.0833169	5.64996	1.60485e-08	2.73744e-07	unga
ENSDARG00000036076	2813.42	0.40511	0.0717043	5.64973	1.607e-08	2.73825e-07	heatr3
ENSDARG00000046107	2067.45	-0.556886	0.0986376	-5.64578	1.64439e-08	2.79904e-07	caskin1
ENSDARG00000074100	692.73	-0.688628	0.122126	-5.63867	1.7137e-08	2.914e-07	zgc:163014
ENSDARG00000077901	1877.63	0.575654	0.102097	5.63828	1.71757e-08	2.91755e-07	herc1
ENSDARG00000014348	1337.94	0.518467	0.0920236	5.63406	1.76011e-08	2.98672e-07	stk17b
ENSDARG00000033012	8554.8	-0.395708	0.070345	-5.62525	1.8524e-08	3.14008e-07	pcnt
ENSDARG00000007198	3053.54	0.338577	0.0601938	5.62479	1.85737e-08	3.14524e-07	mta1
ENSDARG00000103929	1134.73	0.514462	0.0914799	5.62377	1.86834e-08	3.16056e-07	ildr1a
ENSDARG00000096912	214.734	-0.815746	0.145065	-5.62332	1.87322e-08	3.16555e-07	vps50
ENSDARG00000009864	783.564	0.49514	0.0881101	5.61956	1.91446e-08	3.23192e-07	ddx55
ENSDARG00000095829	1170.41	-0.447232	0.0796187	-5.61718	1.94104e-08	3.27341e-07	otulina
ENSDARG00000027461	486.214	-0.606754	0.108042	-5.61589	1.95552e-08	3.29444e-07	mettl26
ENSDARG00000068833	206.523	0.87494	0.15581	5.61541	1.96099e-08	3.30026e-07	dclre1b
ENSDARG00000056549	1326	0.473608	0.0843844	5.61251	1.99407e-08	3.35249e-07	vps26a
ENSDARG00000099954	4110.48	-0.464025	0.0827838	-5.60527	2.07933e-08	3.49224e-07	plekhm1
ENSDARG00000040455	1220.81	0.432308	0.0771297	5.60495	2.08321e-08	3.49518e-07	unc50
ENSDARG00000041723	3839.4	0.383097	0.068361	5.60403	2.09426e-08	3.51014e-07	TUBB4B
ENSDARG00000103283	251.952	-0.772453	0.137853	-5.60346	2.10111e-08	3.51802e-07	si:dkey-238o14.7
ENSDARG00000074852	148.904	1.09656	0.195716	5.60282	2.10887e-08	3.5274e-07	myo15b
ENSDARG00000068192	1306.13	0.466626	0.0832884	5.60253	2.11241e-08	3.52972e-07	taf4a
ENSDARG00000033889	3361.84	-0.413804	0.0738716	-5.60166	2.12303e-08	3.54386e-07	spty2d1
ENSDARG00000104566	399.265	0.650012	0.116082	5.59958	2.14877e-08	3.58317e-07	foxi1
ENSDARG00000043250	598.314	-0.670787	0.119822	-5.59821	2.16579e-08	3.60058e-07	ppm1ab
ENSDARG00000059209	816.455	-0.659208	0.117748	-5.59847	2.16251e-08	3.60058e-07	abhd13
ENSDARG00000103025	3068.26	-0.404888	0.0723241	-5.59823	2.16546e-08	3.60058e-07	hmgcs1
ENSDARG00000034313	3629.95	0.324766	0.0580228	5.5972	2.17835e-08	3.61778e-07	ppp5c
ENSDARG00000094336	589.979	0.594257	0.106194	5.59594	2.1943e-08	3.64059e-07	si:dkeyp-82a1.6
ENSDARG00000018411	3011.21	-0.429424	0.0767412	-5.59574	2.19686e-08	3.64115e-07	mknk1
ENSDARG00000011219	2419.45	0.388281	0.0694257	5.59276	2.23487e-08	3.70041e-07	akt2
ENSDARG00000060438	2500.55	-0.345173	0.0617242	-5.59219	2.24228e-08	3.70893e-07	tbl1x
ENSDARG00000010596	345.087	0.666957	0.119312	5.59001	2.27053e-08	3.75187e-07	slc7a6os
ENSDARG00000063438	2561.87	0.417627	0.0747253	5.58882	2.28614e-08	3.77386e-07	srebf2
ENSDARG00000105142	5253.93	-0.399472	0.0714836	-5.5883	2.29297e-08	3.78132e-07	tcirg1b
ENSDARG00000061773	416.628	-0.671457	0.120222	-5.58515	2.33501e-08	3.84678e-07	neurl1ab
ENSDARG00000059244	373.97	0.656338	0.117635	5.57945	2.41277e-08	3.97089e-07	arfip2a
ENSDARG00000006584	3095.99	0.346002	0.0620198	5.5789	2.4205e-08	3.97961e-07	phf8
ENSDARG00000091062	652.521	-0.585551	0.105023	-5.57545	2.46897e-08	4.05524e-07	si:dkey-199k11.6
ENSDARG00000028815	112.224	-1.16114	0.208356	-5.57285	2.50602e-08	4.11198e-07	zgc:162945
ENSDARG00000102080	92.6509	1.7238	0.309348	5.57236	2.51309e-08	4.11945e-07	mif4gda
ENSDARG00000078315	352.002	-0.82075	0.147297	-5.57209	2.51699e-08	4.12172e-07	zgc:110063
ENSDARG00000098623	980.51	-0.525572	0.0943307	-5.57159	2.52432e-08	4.1296e-07	si:dkey-23f9.4
ENSDARG00000008363	1463.69	-0.403077	0.0723544	-5.57088	2.53462e-08	4.1382e-07	mcl1b
ENSDARG00000061682	857.881	0.702619	0.126122	5.57097	2.5333e-08	4.1382e-07	bicc1a
ENSDARG00000055629	1102.68	-0.666814	0.119733	-5.56917	2.55955e-08	4.17474e-07	dia1b
ENSDARG00000076002	789.59	-0.706603	0.126901	-5.56815	2.57463e-08	4.19517e-07	osbpl5
ENSDARG00000046074	475.765	0.579703	0.104134	5.56692	2.59283e-08	4.22063e-07	stk11
ENSDARG00000014956	1058.38	0.461182	0.0829362	5.56069	2.68709e-08	4.36972e-07	diablob
ENSDARG00000030537	349.607	-0.705472	0.126887	-5.55984	2.70028e-08	4.38682e-07	psmc1a
ENSDARG00000043484	2018.98	0.436898	0.0785927	5.55902	2.71293e-08	4.403e-07	ube2d2
ENSDARG00000095241	1139.01	-0.41545	0.0747442	-5.5583	2.72416e-08	4.41685e-07	mybl2a
ENSDARG00000004218	52.0587	-1.72748	0.31109	-5.55299	2.80832e-08	4.54881e-07	rnd1b
ENSDARG00000010936	220.506	-0.852952	0.153661	-5.55087	2.84259e-08	4.59978e-07	abcb4
ENSDARG00000013312	1305.99	0.411693	0.0741739	5.55037	2.85061e-08	4.6082e-07	cadps2
ENSDARG00000002994	2971.64	-0.49443	0.0890838	-5.55017	2.85397e-08	4.60909e-07	itpkca
ENSDARG00000030053	345.158	0.743951	0.134178	5.5445	2.94803e-08	4.7563e-07	eef1db
ENSDARG00000020377	20119.8	0.345068	0.0623049	5.53838	3.05283e-08	4.92054e-07	eif4g2a
ENSDARG00000076836	1314.8	0.535851	0.096758	5.53806	3.05848e-08	4.92481e-07	gpx4b
ENSDARG00000009387	109.323	1.46406	0.264399	5.5373	3.07164e-08	4.94116e-07	robo4
ENSDARG00000098589	842.451	-0.555374	0.100367	-5.53345	3.13984e-08	5.0459e-07	cyb5a
ENSDARG00000052164	745.624	0.53767	0.0972011	5.53152	3.17464e-08	5.09684e-07	znf507
ENSDARG00000026577	2808.22	-0.413424	0.0747491	-5.53082	3.18742e-08	5.11235e-07	cdk2
ENSDARG00000004037	3498.35	0.333455	0.0603089	5.52912	3.21832e-08	5.15687e-07	cog2
ENSDARG00000026985	1455.7	-0.473001	0.085565	-5.52798	3.23941e-08	5.18558e-07	lims1
ENSDARG00000093220	234.387	-0.788626	0.142848	-5.52073	3.37591e-08	5.39882e-07	znf1127
ENSDARG00000074764	1592.52	0.654269	0.118522	5.52022	3.38578e-08	5.40933e-07	zgc:171426
ENSDARG00000053990	4008.05	0.486762	0.0882046	5.51855	3.41803e-08	5.45554e-07	hmgb2b
ENSDARG00000036038	598.482	-0.616876	0.111794	-5.51795	3.42973e-08	5.46356e-07	harbi1
ENSDARG00000060001	755.335	0.481917	0.0873345	5.51806	3.42754e-08	5.46356e-07	mettl9
ENSDARG00000017294	1797.69	-0.372561	0.0675406	-5.5161	3.46599e-08	5.51597e-07	gnai2b
ENSDARG00000036868	727.567	0.537204	0.0974183	5.5144	3.49964e-08	5.56412e-07	tbpl1
ENSDARG00000006604	2171.91	0.416088	0.0755166	5.50988	3.59069e-08	5.70335e-07	nectin3b
ENSDARG00000098834	248.954	0.918899	0.166943	5.50428	3.7068e-08	5.88208e-07	sox4b
ENSDARG00000042833	820.592	-0.502059	0.0912245	-5.50356	3.72201e-08	5.9005e-07	rffl
ENSDARG00000058020	201.627	-0.939934	0.170794	-5.50332	3.72709e-08	5.90285e-07	fbxw9
ENSDARG00000094887	172.631	0.974805	0.177146	5.50284	3.73712e-08	5.91302e-07	si:ch211-170d8.2
ENSDARG00000100082	3413.47	0.409574	0.0745626	5.49302	3.95117e-08	6.24566e-07	ap3b1a
ENSDARG00000101688	18.4849	-3.58226	0.652213	-5.49246	3.9637e-08	6.25943e-07	si:dkey-207l24.2
ENSDARG00000025513	729.806	-0.695745	0.126683	-5.492	3.97412e-08	6.26985e-07	dip2cb
ENSDARG00000025043	118.369	1.1142	0.202951	5.48999	4.01966e-08	6.3356e-07	trip13
ENSDARG00000071699	426.34	-0.618104	0.112623	-5.48824	4.05953e-08	6.3923e-07	ids
ENSDARG00000053558	13645.8	-0.437098	0.0796486	-5.48783	4.06912e-08	6.40125e-07	rtkn2a
ENSDARG00000005640	346.865	-0.700396	0.127641	-5.48721	4.08328e-08	6.41736e-07	adat3
ENSDARG00000008141	301.996	-0.808867	0.14751	-5.48345	4.17103e-08	6.54899e-07	rbl1
ENSDARG00000008867	771.075	0.4793	0.0874776	5.47912	4.2744e-08	6.70487e-07	rap1b
ENSDARG00000020443	24.5154	-2.7654	0.504759	-5.47865	4.28571e-08	6.71619e-07	xkr6a
ENSDARG00000039931	3606.24	-0.387639	0.0707839	-5.47637	4.34131e-08	6.79682e-07	slc25a33
ENSDARG00000030297	1135.59	-0.528844	0.0965826	-5.47556	4.36126e-08	6.82154e-07	sox13
ENSDARG00000014208	6797.07	-0.335888	0.06139	-5.47138	4.4654e-08	6.97778e-07	zgc:77118
ENSDARG00000094160	570.404	0.559752	0.102317	5.47077	4.48074e-08	6.99507e-07	si:ch73-160h15.3
ENSDARG00000006603	1673.8	0.368016	0.0673083	5.46762	4.56118e-08	7.10711e-07	csrp1a
ENSDARG00000017244	3243.81	0.344229	0.062957	5.46768	4.55962e-08	7.10711e-07	chd6
ENSDARG00000110967	140.807	-1.03473	0.189287	-5.46647	4.59093e-08	7.14667e-07	FP102169.1
ENSDARG00000038615	1779.19	0.496831	0.0909405	5.46325	4.67491e-08	7.27051e-07	pip4p1a
ENSDARG00000063672	470.556	0.639669	0.11715	5.46024	4.755e-08	7.38805e-07	zmp:0000000711
ENSDARG00000103618	2201.13	0.429406	0.0786615	5.45891	4.79058e-08	7.43629e-07	btr18
ENSDARG00000060646	792.254	-0.576373	0.105603	-5.45794	4.81698e-08	7.47019e-07	senp5
ENSDARG00000041600	283.516	0.718909	0.131728	5.45752	4.82831e-08	7.48069e-07	wdr83
ENSDARG00000042571	754.519	-0.522497	0.0957445	-5.4572	4.83699e-08	7.48706e-07	rnaseh1
ENSDARG00000105046	122.487	-1.08495	0.198844	-5.45625	4.86285e-08	7.51999e-07	ccnf
ENSDARG00000074533	2057.22	-0.487752	0.0894347	-5.45372	4.93256e-08	7.62059e-07	slc25a38b
ENSDARG00000037229	802.997	-0.506916	0.0929631	-5.45288	4.95605e-08	7.64967e-07	denr
ENSDARG00000103364	2480.83	0.381837	0.0700335	5.45221	4.97484e-08	7.67146e-07	cs
ENSDARG00000101332	6089.4	-0.298587	0.0547665	-5.452	4.98067e-08	7.67323e-07	uba2
ENSDARG00000019341	91.899	1.6221	0.297606	5.45048	5.02328e-08	7.73161e-07	gpc1a
ENSDARG00000044251	46.295	-2.14488	0.393741	-5.44743	5.11029e-08	7.85815e-07	rasgef1bb
ENSDARG00000070431	1956.83	0.448298	0.0824349	5.43821	5.38188e-08	8.26802e-07	fip1l1b
ENSDARG00000036888	357.02	-0.74188	0.136466	-5.43636	5.43801e-08	8.34642e-07	zgc:153935
ENSDARG00000063242	3825.66	0.329957	0.0607484	5.43153	5.58741e-08	8.56771e-07	ttc13
ENSDARG00000103956	372.243	0.727296	0.134131	5.42227	5.88464e-08	9.01505e-07	si:dkey-17o15.2
ENSDARG00000022727	108.552	-1.43595	0.265047	-5.41773	6.03612e-08	9.23847e-07	epha2b
ENSDARG00000089567	2184.1	0.389173	0.0718565	5.41597	6.09567e-08	9.32092e-07	si:ch211-103b1.2
ENSDARG00000110654	4262.52	0.414759	0.0766111	5.41382	6.16941e-08	9.42487e-07	wdr21
ENSDARG00000067601	3771.89	0.327299	0.0604689	5.41267	6.20902e-08	9.47656e-07	arfgap2
ENSDARG00000087417	547.384	-0.641941	0.118615	-5.41196	6.23403e-08	9.50588e-07	zdhhc5b
ENSDARG00000076689	427.212	-0.669888	0.123807	-5.41073	6.27673e-08	9.56209e-07	gramd1a
ENSDARG00000035610	854.247	-0.472196	0.0872902	-5.4095	6.32018e-08	9.61935e-07	zgc:113208
ENSDARG00000098324	62.1238	-1.52308	0.281581	-5.40903	6.33668e-08	9.63551e-07	si:cabz01054394.6
ENSDARG00000078041	13993.2	0.281426	0.0520309	5.40883	6.34394e-08	9.63761e-07	xpo1a
ENSDARG00000102808	2642.09	0.339823	0.0628529	5.40664	6.42191e-08	9.74704e-07	calr3b
ENSDARG00000018257	261.773	0.726421	0.134404	5.40475	6.48971e-08	9.84083e-07	ncoa1
ENSDARG00000089860	320.031	-0.708408	0.131161	-5.40106	6.62483e-08	1.00364e-06	atxn7l1
ENSDARG00000019208	740.542	0.553659	0.102529	5.40003	6.66288e-08	1.00773e-06	camsap1a
ENSDARG00000099554	361.621	-0.682023	0.126301	-5.4	6.66411e-08	1.00773e-06	sec16b
ENSDARG00000057272	1161.41	0.451309	0.0835814	5.39964	6.67759e-08	1.00884e-06	slc30a9
ENSDARG00000089230	318.218	-0.665164	0.123196	-5.39924	6.69253e-08	1.01016e-06	si:ch211-253b8.2
ENSDARG00000058946	806.08	0.4999	0.0926163	5.39753	6.75632e-08	1.01886e-06	CU856539.2
ENSDARG00000019746	1903.65	-0.372012	0.0689336	-5.39666	6.7891e-08	1.02192e-06	rfng
ENSDARG00000059006	1050.43	0.414909	0.0768814	5.39675	6.78605e-08	1.02192e-06	otud5a
ENSDARG00000103135	845.21	0.500322	0.0928495	5.38852	7.10384e-08	1.06831e-06	stoml2
ENSDARG00000032859	685.114	0.727948	0.135119	5.38747	7.14561e-08	1.07361e-06	fam84b
ENSDARG00000018124	1066.96	0.46301	0.0859746	5.38543	7.22708e-08	1.08486e-06	psmd3
ENSDARG00000062025	803.688	0.482038	0.0895795	5.38111	7.40262e-08	1.11019e-06	cpox
ENSDARG00000013784	556.686	0.553991	0.102968	5.38021	7.43989e-08	1.11374e-06	zgc:77158
ENSDARG00000063341	82.9549	1.27997	0.237903	5.38021	7.43989e-08	1.11374e-06	si:ch211-284b7.3
ENSDARG00000093255	1976.01	-0.375934	0.0698959	-5.37849	7.51113e-08	1.12338e-06	si:dkey-229d11.3
ENSDARG00000071013	360.935	-0.655399	0.121874	-5.37769	7.54488e-08	1.12687e-06	arl6ip6
ENSDARG00000103490	43.1701	2.16929	0.403394	5.37761	7.5482e-08	1.12687e-06	dpysl4
ENSDARG00000030765	1015.01	-0.555737	0.103358	-5.37682	7.58132e-08	1.13078e-06	hadh
ENSDARG00000023683	149.274	1.10662	0.205835	5.37624	7.60587e-08	1.13341e-06	cacna1fb
ENSDARG00000006666	731.404	-0.607233	0.112997	-5.37389	7.70563e-08	1.14724e-06	si:dkeyp-69c1.6
ENSDARG00000077830	250.576	-0.759466	0.141335	-5.37351	7.72181e-08	1.1486e-06	borcs5
ENSDARG00000006169	399.796	-0.641558	0.1194	-5.37318	7.73591e-08	1.14966e-06	lrrk2
ENSDARG00000100057	3034.42	0.400557	0.0745708	5.3715	7.80851e-08	1.15939e-06	ppfibp1b
ENSDARG00000038473	1986.47	-0.372665	0.0693955	-5.37016	7.86668e-08	1.16697e-06	ube2d3
ENSDARG00000039117	695.881	0.507009	0.0944181	5.36983	7.88104e-08	1.16805e-06	tefa
ENSDARG00000015552	713.431	-0.644554	0.120042	-5.36938	7.90056e-08	1.16988e-06	phactr4a
ENSDARG00000031637	2463.31	0.340354	0.0634526	5.3639	8.14425e-08	1.20488e-06	pan3
ENSDARG00000026759	436.012	0.661293	0.123442	5.35711	8.4562e-08	1.2499e-06	ldlrb
ENSDARG00000008127	397.228	-0.614006	0.114661	-5.35498	8.55649e-08	1.26358e-06	pcdh15b
ENSDARG00000003017	1704.45	-0.41008	0.0766053	-5.35315	8.64357e-08	1.2753e-06	ube2al
ENSDARG00000021239	1132.53	0.44389	0.0829468	5.35151	8.72235e-08	1.28576e-06	apaf1
ENSDARG00000099355	21.3837	-2.90851	0.543571	-5.35075	8.75892e-08	1.28999e-06	BX890548.1
ENSDARG00000054454	2317.21	-0.369523	0.0690709	-5.3499	8.80008e-08	1.29489e-06	epha4a
ENSDARG00000087392	1629.01	-0.368159	0.0688694	-5.34576	9.00397e-08	1.3237e-06	si:ch73-160p18.3
ENSDARG00000042344	2124.26	-0.373972	0.0699799	-5.34399	9.09232e-08	1.33548e-06	trmt6
ENSDARG00000099741	271.015	0.721125	0.134945	5.34383	9.10033e-08	1.33548e-06	mvb12a
ENSDARG00000003495	2670.42	0.408681	0.0765192	5.3409	9.24876e-08	1.35604e-06	madd
ENSDARG00000002494	64.7797	1.48311	0.27773	5.34012	9.28843e-08	1.35889e-06	itgb6
ENSDARG00000058419	6623.56	0.353768	0.0662456	5.34025	9.28188e-08	1.35889e-06	gcn1
ENSDARG00000100487	1800.39	-0.45725	0.0856269	-5.34003	9.29307e-08	1.35889e-06	nploc4
ENSDARG00000074183	164.192	0.961967	0.180172	5.33917	9.33747e-08	1.36417e-06	si:dkey-172j4.3
ENSDARG00000105657	646.686	0.51837	0.0971163	5.33763	9.41712e-08	1.37458e-06	si:cabz01080528.1
ENSDARG00000034777	141.482	1.0004	0.187581	5.33318	9.651e-08	1.40747e-06	txn2
ENSDARG00000018312	5333.73	0.408237	0.0765754	5.33118	9.75766e-08	1.42176e-06	rell1
ENSDARG00000031647	357.354	-0.689334	0.129315	-5.33065	9.78601e-08	1.42462e-06	stat2
ENSDARG00000010770	1540.62	0.586236	0.110036	5.32766	9.94863e-08	1.44701e-06	sox19a
ENSDARG00000099680	11778.4	-0.311608	0.0584961	-5.32698	9.98601e-08	1.45116e-06	BX004980.1
ENSDARG00000052950	65.6648	1.46604	0.275232	5.32658	1.00077e-07	1.45303e-06	arhgap23a
ENSDARG00000007172	4966.12	0.327278	0.0615302	5.31898	1.04352e-07	1.51375e-06	plxna3
ENSDARG00000036489	6061.99	-0.36217	0.0680975	-5.3184	1.04682e-07	1.5172e-06	zgc:112356
ENSDARG00000093864	1330.45	0.461805	0.0868492	5.31732	1.05305e-07	1.52488e-06	wee1
ENSDARG00000003910	5747.79	-0.5581	0.104975	-5.31652	1.05769e-07	1.53024e-06	med13b
ENSDARG00000098272	1719.29	0.365443	0.0687656	5.31433	1.07053e-07	1.54746e-06	nipbla
ENSDARG00000036082	71.1609	-1.36608	0.257152	-5.31236	1.08212e-07	1.56283e-06	tph1b
ENSDARG00000044325	531.257	-0.593099	0.111713	-5.30915	1.10138e-07	1.58924e-06	DDX19A
ENSDARG00000008706	2372.73	0.402017	0.0757546	5.30684	1.11543e-07	1.60655e-06	paip2b
ENSDARG00000012222	5749.58	-0.438961	0.0827145	-5.30694	1.11483e-07	1.60655e-06	nup35
ENSDARG00000101627	1337.25	0.58447	0.110138	5.30669	1.11631e-07	1.60655e-06	ssr1
ENSDARG00000052190	393.05	-0.63586	0.119855	-5.30522	1.12534e-07	1.61812e-06	fdx2
ENSDARG00000040248	939.689	-0.514447	0.0970188	-5.30255	1.14197e-07	1.64059e-06	crata
ENSDARG00000057853	2854.06	0.328101	0.0618803	5.30219	1.14422e-07	1.64238e-06	atp6v0ca
ENSDARG00000073931	1335.67	-0.395932	0.0747096	-5.29962	1.16047e-07	1.66425e-06	otulina
ENSDARG00000017489	30.8615	-2.30885	0.435692	-5.29928	1.16259e-07	1.66584e-06	zgc:123068
ENSDARG00000102320	2074.57	0.403479	0.076161	5.29771	1.17262e-07	1.67874e-06	mob1a
ENSDARG00000039872	510.233	-0.54286	0.102482	-5.29713	1.17636e-07	1.68262e-06	lamtor2
ENSDARG00000043035	114.138	-1.35881	0.256531	-5.29686	1.17808e-07	1.68362e-06	capn3b
ENSDARG00000079639	10167.5	0.371878	0.0702204	5.29587	1.18453e-07	1.69136e-06	PRRC2B
ENSDARG00000098441	121.303	-1.02406	0.193389	-5.29534	1.18794e-07	1.69475e-06	nars2
ENSDARG00000101072	2131.94	-0.459298	0.0867691	-5.29333	1.20109e-07	1.71202e-06	cnot6b
ENSDARG00000100573	224.242	-0.838658	0.158449	-5.29294	1.20367e-07	1.71422e-06	ckap2l
ENSDARG00000056193	87.4146	-1.28202	0.24247	-5.28733	1.24115e-07	1.76605e-06	nme7
ENSDARG00000026842	8157	0.301359	0.0570203	5.28513	1.25617e-07	1.78588e-06	acin1b
ENSDARG00000097712	224.56	0.81189	0.153813	5.27841	1.30313e-07	1.85103e-06	CR848667.1
ENSDARG00000025766	1067.22	-0.69439	0.131563	-5.278	1.30602e-07	1.85353e-06	zgc:66440
ENSDARG00000062045	1280.82	0.589796	0.111793	5.27577	1.32198e-07	1.87294e-06	il1rapl1a
ENSDARG00000069298	3079.32	0.316983	0.0600821	5.27584	1.32152e-07	1.87294e-06	osbpl9
ENSDARG00000057484	13476.1	0.343298	0.0651369	5.2704	1.36125e-07	1.92692e-06	srsf2a
ENSDARG00000095288	516.083	0.688625	0.130725	5.26773	1.38119e-07	1.95345e-06	rusc2
ENSDARG00000056679	361.111	-0.765686	0.145359	-5.26754	1.38263e-07	1.9538e-06	morc3a
ENSDARG00000074131	6579.34	0.276445	0.0525503	5.26058	1.43606e-07	2.02755e-06	kif5ba
ENSDARG00000035327	23.1081	-2.64769	0.503425	-5.25935	1.44562e-07	2.0393e-06	ckma
ENSDARG00000076160	199.077	-0.833616	0.158551	-5.25771	1.45857e-07	2.05579e-06	si:dkey-285e18.2
ENSDARG00000105147	759.662	-0.585897	0.111448	-5.25711	1.46333e-07	2.06073e-06	osbpl1a
ENSDARG00000117464	6000.97	0.29385	0.0559373	5.2532	1.49481e-07	2.10325e-06	AL935174.5
ENSDARG00000004939	272.051	0.907911	0.173248	5.24054	1.60104e-07	2.25079e-06	mtdhb
ENSDARG00000098344	3252.37	-0.35788	0.0682936	-5.24032	1.60302e-07	2.25164e-06	rab18b
ENSDARG00000041896	6041.77	-1.05466	0.201281	-5.23974	1.60803e-07	2.25675e-06	dnajc5ga
ENSDARG00000061936	669.352	-0.59845	0.114268	-5.23726	1.62982e-07	2.28537e-06	fbxo10
ENSDARG00000005513	2492.76	0.377977	0.0721765	5.23685	1.63342e-07	2.28846e-06	naca
ENSDARG00000109717	271.624	0.697525	0.133209	5.23632	1.6381e-07	2.29306e-06	SLC35E2B
ENSDARG00000011049	3427.55	0.312267	0.059688	5.23165	1.68005e-07	2.34693e-06	slc17a9b
ENSDARG00000098859	2160.08	0.428332	0.0818747	5.23156	1.68088e-07	2.34693e-06	nop14
ENSDARG00000103207	742.065	-0.540356	0.103282	-5.23187	1.67803e-07	2.34693e-06	rab11fip4b
ENSDARG00000098726	617.469	0.529409	0.101204	5.23109	1.68516e-07	2.35091e-06	rptor
ENSDARG00000015472	1964.77	0.423241	0.0809789	5.22655	1.727e-07	2.40723e-06	gpc4
ENSDARG00000088699	2717.34	-0.344342	0.0658994	-5.22527	1.73904e-07	2.42194e-06	pdzd8
ENSDARG00000104380	9742.7	0.370264	0.0708854	5.22342	1.75646e-07	2.44414e-06	si:dkey-238k10.2
ENSDARG00000057648	7921.6	-0.340852	0.065305	-5.21938	1.79527e-07	2.49601e-06	dnttip2
ENSDARG00000023933	329.655	-0.648386	0.124256	-5.21815	1.80717e-07	2.51044e-06	skila
ENSDARG00000105117	4620.61	0.378793	0.0726201	5.21609	1.82741e-07	2.5364e-06	sdad1
ENSDARG00000031683	109.792	1.0821	0.207483	5.21538	1.83439e-07	2.54394e-06	fosab
ENSDARG00000042725	768.475	0.565677	0.10851	5.21313	1.85685e-07	2.5729e-06	cebpb
ENSDARG00000037618	2074.31	0.614656	0.11793	5.21204	1.86779e-07	2.58588e-06	ddit4
ENSDARG00000013025	1419.46	-0.475172	0.0912032	-5.21004	1.888e-07	2.61166e-06	ints6
ENSDARG00000035468	782.796	-0.546235	0.104871	-5.20866	1.90212e-07	2.62695e-06	slc25a25b
ENSDARG00000098680	667.268	-0.539221	0.103524	-5.20864	1.90226e-07	2.62695e-06	si:zfos-2326c3.2
ENSDARG00000031680	115.046	1.05277	0.202203	5.20651	1.92425e-07	2.65508e-06	ercc1
ENSDARG00000067796	382.566	0.668666	0.128478	5.2045	1.94516e-07	2.68167e-06	clpxb
ENSDARG00000036987	1233.16	0.597318	0.114791	5.20352	1.95551e-07	2.69367e-06	has2
ENSDARG00000044183	369.569	-0.778628	0.149682	-5.20187	1.97291e-07	2.71536e-06	prkab1a
ENSDARG00000044943	5824.56	0.278583	0.0535568	5.20162	1.97554e-07	2.71669e-06	npepps
ENSDARG00000055889	1715.4	-0.371531	0.0714329	-5.20112	1.98093e-07	2.72183e-06	zgc:153215
ENSDARG00000077009	1676.45	0.373536	0.0718321	5.20013	1.99144e-07	2.73398e-06	wdfy4
ENSDARG00000032951	2374.09	-0.351628	0.0676346	-5.19894	2.00425e-07	2.74926e-06	nrbp2a
ENSDARG00000089162	1670.5	-0.541835	0.104239	-5.198	2.01445e-07	2.76094e-06	afap1l1a
ENSDARG00000062122	98.6158	-1.20428	0.2317	-5.19759	2.01888e-07	2.76437e-06	klhl5
ENSDARG00000093931	3315.16	-0.493698	0.0949884	-5.19746	2.02032e-07	2.76437e-06	rflnb
ENSDARG00000016743	4152.72	-0.333221	0.064144	-5.19488	2.04847e-07	2.80054e-06	angel2
ENSDARG00000007693	621.494	0.560031	0.107863	5.19205	2.07993e-07	2.84118e-06	nfkbiab
ENSDARG00000045776	5780.43	0.318874	0.061431	5.19077	2.09425e-07	2.85599e-06	cnbpa
ENSDARG00000067517	63.9796	1.96153	0.377877	5.19092	2.09262e-07	2.85599e-06	ccdc15
ENSDARG00000071524	4764.15	0.2922	0.0563072	5.18939	2.10985e-07	2.87486e-06	insrb
ENSDARG00000043179	4219.9	-0.505943	0.0975024	-5.18903	2.11394e-07	2.87748e-06	bag4
ENSDARG00000099745	4728.51	0.37154	0.0716026	5.18891	2.11528e-07	2.87748e-06	baz1a
ENSDARG00000091419	667.402	0.555945	0.107178	5.1871	2.13593e-07	2.90316e-06	nrarpa
ENSDARG00000031506	640.808	0.494739	0.0954031	5.18578	2.15117e-07	2.92145e-06	flvcr2b
ENSDARG00000078814	2868.8	0.32421	0.0625242	5.18536	2.15599e-07	2.92558e-06	si:dkey-34m19.3
ENSDARG00000027109	11662.8	0.267573	0.0516456	5.18095	2.20753e-07	2.99304e-06	zfr
ENSDARG00000070080	1288.12	0.532197	0.102772	5.17842	2.23774e-07	3.03149e-06	nbeaa
ENSDARG00000014550	1473.53	0.393955	0.0760991	5.17687	2.25639e-07	3.05423e-06	rfx3
ENSDARG00000076801	1121.25	0.538214	0.103997	5.17526	2.27589e-07	3.07808e-06	arap3
ENSDARG00000061737	2821.74	-0.31307	0.0605015	-5.17457	2.28433e-07	3.08695e-06	ece1
ENSDARG00000006112	5029.21	-0.307759	0.0595546	-5.16767	2.37025e-07	3.20042e-06	myof
ENSDARG00000091905	69.4589	1.40897	0.272677	5.1672	2.37629e-07	3.20594e-06	si:dkey-108k21.21
ENSDARG00000022918	798.772	0.476844	0.0923393	5.16404	2.41673e-07	3.25781e-06	tbcc
ENSDARG00000027915	966.958	-0.482369	0.0934394	-5.16237	2.43844e-07	3.28169e-06	zc2hc1a
ENSDARG00000075456	845.15	0.44559	0.086313	5.1625	2.43677e-07	3.28169e-06	pik3ca
ENSDARG00000069168	3240.87	0.307107	0.0595174	5.15995	2.4701e-07	3.32156e-06	si:dkey-73n10.1
ENSDARG00000034497	3596.04	0.331991	0.0644095	5.15437	2.54486e-07	3.41928e-06	fbxl14a
ENSDARG00000038151	101.233	1.61529	0.313607	5.15067	2.59558e-07	3.48173e-06	zgc:92360
ENSDARG00000099284	1255.81	-0.491173	0.0953607	-5.15069	2.59531e-07	3.48173e-06	si:dkey-228b2.6
ENSDARG00000063580	4259.36	0.329697	0.0640129	5.15048	2.59824e-07	3.48244e-06	ppp1r9ala
ENSDARG00000061168	611.595	0.722952	0.14038	5.14997	2.60523e-07	3.48896e-06	dhx34
ENSDARG00000094526	121.968	-1.33405	0.259176	-5.14725	2.64333e-07	3.5371e-06	ksr2
ENSDARG00000045066	89.148	1.21006	0.235107	5.14683	2.64927e-07	3.54216e-06	entpd1
ENSDARG00000005924	217.835	1.15868	0.225204	5.14501	2.675e-07	3.57365e-06	serpina10a
ENSDARG00000004877	2763.07	-0.335196	0.0651913	-5.14172	2.72227e-07	3.63384e-06	rock2b
ENSDARG00000063031	2223.5	-0.360427	0.0701019	-5.14147	2.72594e-07	3.63577e-06	rad54l2
ENSDARG00000021838	665.95	-0.570462	0.110993	-5.13963	2.75276e-07	3.66855e-06	rps23
ENSDARG00000068596	728.901	-0.512485	0.0997639	-5.13698	2.79194e-07	3.71775e-06	cnot11
ENSDARG00000068918	117.706	1.04715	0.203879	5.13615	2.80423e-07	3.73109e-06	map2k2b
ENSDARG00000100508	9974.28	0.28834	0.0561433	5.13579	2.80965e-07	3.73526e-06	ubn2b
ENSDARG00000078310	5363.9	0.282804	0.0550721	5.13516	2.81906e-07	3.74474e-06	cecr2
ENSDARG00000101365	94.6356	-1.13023	0.220217	-5.13233	2.86179e-07	3.79841e-06	si:cabz01021430.2
ENSDARG00000020979	2132.91	0.39122	0.0762698	5.12941	2.90644e-07	3.85403e-06	ripor3
ENSDARG00000042091	202.163	-0.8039	0.156727	-5.12929	2.90839e-07	3.85403e-06	btbd2a
ENSDARG00000078991	1114.67	-0.44629	0.0870757	-5.12532	2.97037e-07	3.93298e-06	si:ch211-195e19.1
ENSDARG00000038476	4275.17	-0.3673	0.071686	-5.12374	2.99535e-07	3.96034e-06	si:dkeyp-68b7.7
ENSDARG00000045888	1102.12	-0.507417	0.0990331	-5.12371	2.99586e-07	3.96034e-06	acat1
ENSDARG00000061169	5494.98	0.309975	0.0605077	5.1229	3.00877e-07	3.9742e-06	larp1b
ENSDARG00000000442	1149.94	0.417148	0.0814793	5.11967	3.06067e-07	4.03624e-06	slc39a13
ENSDARG00000076673	783.378	0.557267	0.108846	5.11978	3.05894e-07	4.03624e-06	wu:fi04e12
ENSDARG00000046054	654.312	-0.523859	0.102396	-5.11599	3.12096e-07	4.11037e-06	CT027815.1
ENSDARG00000098884	292.815	1.07128	0.2094	5.11594	3.1219e-07	4.11037e-06	BX649355.1
ENSDARG00000017696	2789.22	0.317995	0.0621756	5.11446	3.14641e-07	4.13932e-06	utp25
ENSDARG00000015915	915.719	0.460432	0.0900411	5.11357	3.16124e-07	4.15549e-06	slc25a36b
ENSDARG00000098029	410.632	-0.637298	0.124795	-5.10676	3.27733e-07	4.30465e-06	si:ch211-129o18.4
ENSDARG00000090337	16253.6	0.260869	0.0510865	5.10642	3.28327e-07	4.309e-06	pprc1
ENSDARG00000076302	989.343	0.571727	0.111996	5.1049	3.30972e-07	4.34023e-06	DTX4
ENSDARG00000099766	2496.47	-0.336911	0.0660018	-5.10457	3.31544e-07	4.34426e-06	myl12.1
ENSDARG00000021257	1598.21	0.375187	0.0735357	5.10211	3.35886e-07	4.39764e-06	eif3d
ENSDARG00000073843	1255.57	0.461037	0.0904256	5.09853	3.42307e-07	4.47813e-06	myo9ab
ENSDARG00000018968	7849.68	-0.267908	0.05255	-5.09816	3.42968e-07	4.4832e-06	acvr1ba
ENSDARG00000043209	1036.81	-0.424754	0.0833254	-5.09753	3.4411e-07	4.49454e-06	nsun5
ENSDARG00000000568	10139.4	-0.342549	0.067207	-5.09692	3.45228e-07	4.50556e-06	ell
ENSDARG00000060687	1206.02	-0.38933	0.0763914	-5.09651	3.45975e-07	4.51171e-06	chd2
ENSDARG00000059630	2503.08	0.319401	0.062728	5.09184	3.54612e-07	4.62067e-06	mlec
ENSDARG00000055115	1357.78	-0.496806	0.0976402	-5.08812	3.61622e-07	4.70827e-06	dtnbp1a
ENSDARG00000090447	1995.79	-0.469351	0.0925725	-5.07009	3.97621e-07	5.17286e-06	mtbp
ENSDARG00000104985	2340.38	0.340316	0.067126	5.06981	3.98215e-07	5.17647e-06	CR391944.2
ENSDARG00000007671	93.9256	1.1373	0.224361	5.06903	3.99839e-07	5.19347e-06	ghrb
ENSDARG00000056559	1288.82	0.394625	0.0778689	5.06781	4.0241e-07	5.22272e-06	ccz1
ENSDARG00000052859	1173.13	-0.441722	0.0872368	-5.06349	4.11655e-07	5.33849e-06	chp1
ENSDARG00000028982	1804.06	0.345503	0.068257	5.06179	4.1533e-07	5.38188e-06	pcca
ENSDARG00000012899	261.063	-0.711489	0.140617	-5.05975	4.19809e-07	5.43562e-06	ddx49
ENSDARG00000102356	210.596	0.842589	0.16663	5.05665	4.26696e-07	5.52044e-06	scp2b
ENSDARG00000018562	3272.6	0.306782	0.0607193	5.05246	4.36155e-07	5.63838e-06	cope
ENSDARG00000093797	199.207	-0.813189	0.160964	-5.05198	4.37249e-07	5.64806e-06	si:dkey-81p22.11
ENSDARG00000004211	532.19	-0.566518	0.112154	-5.05127	4.38882e-07	5.66023e-06	ccdc106a
ENSDARG00000033376	760.626	-0.498393	0.0986664	-5.05129	4.3883e-07	5.66023e-06	chchd4a
ENSDARG00000029931	2177.33	0.332723	0.0658828	5.05022	4.4131e-07	5.68707e-06	atp13a1
ENSDARG00000075687	2147.45	-0.325924	0.0645448	-5.04958	4.42774e-07	5.70145e-06	anapc1
ENSDARG00000007531	817.902	-0.45182	0.0895727	-5.04417	4.55496e-07	5.85294e-06	zcchc9
ENSDARG00000096594	990.293	0.447689	0.0887546	5.04412	4.55609e-07	5.85294e-06	lratb.1
ENSDARG00000101635	325.815	0.696842	0.138143	5.04437	4.55021e-07	5.85294e-06	dact1
ENSDARG00000015822	67.5723	-1.28901	0.255561	-5.04383	4.56299e-07	5.8548e-06	sesn3
ENSDARG00000057707	5635.76	-0.3574	0.0708599	-5.04376	4.56469e-07	5.8548e-06	zgc:66443
ENSDARG00000013250	1160.26	0.419804	0.0832378	5.04343	4.57271e-07	5.86051e-06	tars
ENSDARG00000016710	354.12	0.785458	0.155787	5.04186	4.61022e-07	5.90396e-06	rchy1
ENSDARG00000115712	729.956	-0.501518	0.0995237	-5.03918	4.67533e-07	5.98267e-06	twf1a
ENSDARG00000033436	843.331	-0.465912	0.0925005	-5.03686	4.73226e-07	6.0508e-06	mboat7
ENSDARG00000004647	3268.54	-0.391096	0.0776548	-5.03633	4.74534e-07	6.0628e-06	spice1
ENSDARG00000029695	412.629	-0.68551	0.136178	-5.03394	4.80496e-07	6.13419e-06	pgp
ENSDARG00000078106	1034.92	0.502481	0.0998595	5.03189	4.8568e-07	6.19554e-06	ocrl
ENSDARG00000074431	8307.25	0.377537	0.0750459	5.03074	4.8859e-07	6.22781e-06	ddb1
ENSDARG00000045886	178.637	-0.828981	0.164797	-5.03032	4.89667e-07	6.23669e-06	slc38a2
ENSDARG00000007169	239.976	-0.692874	0.137852	-5.02621	5.00272e-07	6.36682e-06	itgb1bp1
ENSDARG00000005945	7013.61	0.373737	0.0743668	5.02558	5.01903e-07	6.38262e-06	sart1
ENSDARG00000099241	1504.88	-0.45768	0.0910893	-5.02452	5.04686e-07	6.41304e-06	ppp2cb
ENSDARG00000111450	609.464	-0.531297	0.105767	-5.02329	5.0793e-07	6.44926e-06	CR792437.1
ENSDARG00000035706	3428.97	0.385303	0.0767285	5.02163	5.12335e-07	6.50016e-06	dock6
ENSDARG00000026892	316.146	0.626714	0.124809	5.02138	5.13021e-07	6.50382e-06	gpatch11
ENSDARG00000052644	279.97	-0.716558	0.142779	-5.01864	5.20384e-07	6.59206e-06	ca10a
ENSDARG00000078953	783.12	0.532155	0.106063	5.01734	5.23917e-07	6.6317e-06	epn3a
ENSDARG00000021147	346.041	-0.733774	0.146266	-5.01669	5.25684e-07	6.64893e-06	nipal3
ENSDARG00000005163	1608.33	0.357431	0.0713479	5.0097	5.45154e-07	6.88987e-06	efr3a
ENSDARG00000035905	600.894	0.488859	0.0975985	5.00888	5.47473e-07	6.90853e-06	slc25a44b
ENSDARG00000052764	147.54	1.24395	0.248344	5.00898	5.47202e-07	6.90853e-06	chrnb3a
ENSDARG00000009390	240.114	0.927449	0.185213	5.00747	5.51501e-07	6.95401e-06	npl
ENSDARG00000009549	9516.47	0.271789	0.0542966	5.00563	5.56801e-07	7.01544e-06	ubr4
ENSDARG00000086342	1023.22	0.509804	0.101857	5.00512	5.58286e-07	7.02875e-06	zgc:101566
ENSDARG00000102081	2802.65	0.445416	0.0891414	4.99673	5.83097e-07	7.33548e-06	mprip
ENSDARG00000095750	355.491	-0.600245	0.12016	-4.99538	5.87207e-07	7.38152e-06	fdxacb1
ENSDARG00000019774	2532.95	-0.327178	0.0655234	-4.99331	5.93547e-07	7.44978e-06	zhx3
ENSDARG00000070164	2094.51	-0.35263	0.0706193	-4.9934	5.93268e-07	7.44978e-06	ubr2
ENSDARG00000014817	9722.85	0.278631	0.0558158	4.99197	5.97658e-07	7.49565e-06	ranbp1
ENSDARG00000004502	405.384	0.611386	0.12253	4.98967	6.04815e-07	7.57382e-06	rcor3
ENSDARG00000101317	273.15	0.668681	0.134012	4.9897	6.04731e-07	7.57382e-06	grinaa
ENSDARG00000098786	286.455	-0.636244	0.127611	-4.9858	6.1705e-07	7.72113e-06	rangrf
ENSDARG00000068602	1175.11	0.38928	0.0781013	4.9843	6.21878e-07	7.77561e-06	dalrd3
ENSDARG00000061120	273.152	-0.756982	0.15189	-4.98374	6.23659e-07	7.79194e-06	slc43a2b
ENSDARG00000036096	220.9	0.803173	0.161194	4.98267	6.27143e-07	7.8295e-06	smad3a
ENSDARG00000003776	1647.78	-0.38585	0.0774553	-4.98159	6.3065e-07	7.86728e-06	pip4k2aa
ENSDARG00000032651	5134.77	-0.288602	0.0579672	-4.97871	6.40081e-07	7.9728e-06	ppp1r10
ENSDARG00000059835	337.898	0.59709	0.119927	4.97876	6.39927e-07	7.9728e-06	zfyve27
ENSDARG00000027501	897.035	-0.454794	0.0914295	-4.97426	6.5498e-07	8.15219e-06	usp20
ENSDARG00000020449	1135.84	0.403333	0.0810865	4.97411	6.55481e-07	8.15224e-06	yipf3
ENSDARG00000035009	287.963	-0.749058	0.150681	-4.97114	6.65595e-07	8.27174e-06	trim35-27
ENSDARG00000011948	2666.57	0.485793	0.0977522	4.96964	6.70782e-07	8.32989e-06	insra
ENSDARG00000051953	3261.11	0.311539	0.0626916	4.96938	6.71671e-07	8.33462e-06	ythdc1
ENSDARG00000058734	2079.69	0.402849	0.0810779	4.96866	6.74154e-07	8.35911e-06	prdx1
ENSDARG00000094171	208.93	0.931906	0.187713	4.96453	6.88673e-07	8.53267e-06	lrp1ba
ENSDARG00000075737	2125.21	0.344568	0.0694129	4.96404	6.90415e-07	8.5478e-06	zgc:165518
ENSDARG00000100119	95.9884	1.09489	0.220602	4.96318	6.93478e-07	8.57924e-06	caskb
ENSDARG00000078657	45.4543	-1.71249	0.345294	-4.95952	7.06677e-07	8.73594e-06	FNDC10
ENSDARG00000061052	9238.29	0.263953	0.0532289	4.95883	7.09177e-07	8.76024e-06	nipblb
ENSDARG00000091734	225.345	-0.723328	0.146046	-4.95274	7.31749e-07	9.03225e-06	traf3ip2l
ENSDARG00000036063	383.564	0.574546	0.116136	4.9472	7.52897e-07	9.28629e-06	ppp1r11
ENSDARG00000089724	55.0511	-1.44355	0.291868	-4.94591	7.57879e-07	9.34072e-06	cyldb
ENSDARG00000079468	101.892	-1.44676	0.292594	-4.9446	7.62993e-07	9.39668e-06	rhobtb1
ENSDARG00000100209	4522	0.337284	0.0682213	4.94397	7.65488e-07	9.42033e-06	prpf39
ENSDARG00000077584	136.689	-0.937763	0.189691	-4.94363	7.66827e-07	9.42973e-06	cln6a
ENSDARG00000056842	346.369	-0.641262	0.129785	-4.94097	7.7733e-07	9.55173e-06	usp30
ENSDARG00000114762	517.81	0.610412	0.123622	4.93774	7.90335e-07	9.70424e-06	CABZ01084131.1
ENSDARG00000018782	1259.33	-0.404013	0.0818273	-4.93738	7.91779e-07	9.7147e-06	kdm4aa
ENSDARG00000040990	8663.76	0.360196	0.0729751	4.93588	7.97915e-07	9.78266e-06	usp37
ENSDARG00000002840	337.64	0.858027	0.173844	4.93561	7.98986e-07	9.78848e-06	si:dkey-28b4.8
ENSDARG00000063233	3274.37	0.351394	0.071202	4.93516	8.00839e-07	9.80385e-06	baz1a
ENSDARG00000044153	1418.19	0.387369	0.0785084	4.93411	8.05173e-07	9.84955e-06	ppp1cb
ENSDARG00000007764	4623.35	-0.291307	0.0590427	-4.93383	8.06316e-07	9.85617e-06	klhdc10
ENSDARG00000004745	3267.04	0.31007	0.0628517	4.93336	8.08284e-07	9.87287e-06	lmbr1l
ENSDARG00000056628	329.794	-0.693336	0.140553	-4.93293	8.10041e-07	9.88696e-06	tmem170a
ENSDARG00000069252	554.968	0.796382	0.161596	4.92822	8.29816e-07	1.01208e-05	mixl1
ENSDARG00000078502	215.13	-0.731779	0.148515	-4.92732	8.33664e-07	1.01602e-05	si:ch211-150o23.3
ENSDARG00000061391	49.0289	-1.77518	0.36084	-4.91958	8.67311e-07	1.056e-05	grhl1
ENSDARG00000078576	1205.02	0.504455	0.102542	4.91948	8.67759e-07	1.056e-05	setd5
ENSDARG00000003789	8778.89	0.252521	0.0513451	4.9181	8.73868e-07	1.06264e-05	dennd5b
ENSDARG00000091348	707.164	0.453901	0.0923411	4.91548	8.85654e-07	1.07618e-05	rtn3
ENSDARG00000035028	2437.5	0.39834	0.0810512	4.91467	8.89336e-07	1.07985e-05	lpcat4
ENSDARG00000056836	1173.42	0.560957	0.114169	4.91338	8.95196e-07	1.08616e-05	si:ch211-125o16.4
ENSDARG00000101323	597.213	-0.657409	0.133812	-4.91294	8.97228e-07	1.08782e-05	trnau1apa
ENSDARG00000075461	4992.56	-0.36996	0.0753424	-4.91039	9.08975e-07	1.10125e-05	kmt5c
ENSDARG00000052701	797.139	-0.464908	0.0947149	-4.9085	9.17757e-07	1.11107e-05	smpd2b
ENSDARG00000051851	1013.77	-0.385329	0.07853	-4.90678	9.25845e-07	1.12003e-05	ctu2
ENSDARG00000043006	956.284	-0.543879	0.110888	-4.90476	9.35401e-07	1.13076e-05	gnav1
ENSDARG00000105123	1248.45	0.37627	0.0767562	4.90215	9.47942e-07	1.14508e-05	zer1
ENSDARG00000036179	228.241	-0.735131	0.150013	-4.90044	9.5621e-07	1.15421e-05	myo1ea
ENSDARG00000101561	1745.94	-0.328119	0.0669705	-4.89947	9.60979e-07	1.15911e-05	dbt
ENSDARG00000115862	844.552	-0.480949	0.09819	-4.89814	9.67475e-07	1.16609e-05	vapal
ENSDARG00000105430	32.0119	2.23889	0.457459	4.89419	9.87134e-07	1.18891e-05	si:ch73-368j24.11
ENSDARG00000040161	4125.11	-0.363188	0.0743065	-4.8877	1.02018e-06	1.22781e-05	zgc:92287
ENSDARG00000006862	1166.91	-0.387382	0.0793162	-4.88402	1.03946e-06	1.2501e-05	kifap3b
ENSDARG00000054578	868.283	0.487378	0.0997965	4.88371	1.04107e-06	1.25063e-05	arl6ip1
ENSDARG00000099524	319.521	0.75578	0.154757	4.88364	1.04143e-06	1.25063e-05	gbe1b
ENSDARG00000095332	2005.16	-0.403945	0.0827395	-4.88213	1.04945e-06	1.25935e-05	si:dkey-14d8.1
ENSDARG00000008235	2037.87	0.31836	0.0652367	4.88008	1.06041e-06	1.27156e-05	cog5
ENSDARG00000038213	1094.33	-0.416933	0.0854422	-4.87971	1.0624e-06	1.27209e-05	slc35b1
ENSDARG00000058159	460.521	0.534109	0.109454	4.87975	1.06219e-06	1.27209e-05	ipo8
ENSDARG00000101557	1894.76	0.321013	0.0657922	4.8792	1.06517e-06	1.27447e-05	scarb1
ENSDARG00000074902	196.448	-0.77442	0.15874	-4.87855	1.06869e-06	1.27775e-05	nol4la
ENSDARG00000099368	1618.56	-0.504458	0.103456	-4.87608	1.08215e-06	1.29291e-05	slc25a42
ENSDARG00000008014	1893.18	-0.3856	0.0791008	-4.8748	1.08921e-06	1.30039e-05	nudt17
ENSDARG00000059642	2646.08	-0.314651	0.06456	-4.87378	1.09481e-06	1.30612e-05	mtmr14
ENSDARG00000104342	3102.04	0.460786	0.0945482	4.87356	1.09607e-06	1.30667e-05	csnk1g1
ENSDARG00000056961	696.164	-0.549844	0.112832	-4.87312	1.09848e-06	1.3086e-05	ccdc30
ENSDARG00000040081	3195.6	0.291962	0.0599221	4.87236	1.10274e-06	1.31272e-05	zp3d.1
ENSDARG00000039880	1798.67	-0.344081	0.0706217	-4.87217	1.10377e-06	1.31299e-05	arpp19b
ENSDARG00000037955	383.554	-0.592177	0.121556	-4.87162	1.10687e-06	1.31476e-05	pih1d1
ENSDARG00000101309	1643.79	-0.518198	0.10637	-4.87166	1.10666e-06	1.31476e-05	si:ch73-100l22.3
ENSDARG00000011027	4086.73	-0.298371	0.0612628	-4.87034	1.11404e-06	1.32232e-05	fgfr1a
ENSDARG00000061741	5757.45	-0.270504	0.0555662	-4.86813	1.12659e-06	1.33626e-05	itpr3
ENSDARG00000023916	1048.89	0.504607	0.103706	4.86574	1.14027e-06	1.35151e-05	phactr1
ENSDARG00000092499	223.79	0.791729	0.162724	4.86546	1.14192e-06	1.35248e-05	si:ch211-183d21.1
ENSDARG00000070589	226.905	-0.799	0.164232	-4.86507	1.14415e-06	1.35414e-05	mrpl35
ENSDARG00000032221	1622.86	-0.448691	0.0922344	-4.86468	1.14642e-06	1.35585e-05	phactr4b
ENSDARG00000089862	323.634	-0.814964	0.167534	-4.86447	1.14762e-06	1.35629e-05	si:dkey-16j16.4
ENSDARG00000087857	187.343	0.794539	0.163538	4.85843	1.18318e-06	1.39731e-05	si:ch211-180a12.2
ENSDARG00000037002	1761.71	-0.35411	0.0729068	-4.85702	1.19164e-06	1.40629e-05	zgc:152968
ENSDARG00000070494	153.553	0.861269	0.177412	4.85463	1.20612e-06	1.42236e-05	pdgfra
ENSDARG00000088073	2390.51	-0.421681	0.0869275	-4.85095	1.22872e-06	1.44796e-05	fam110b
ENSDARG00000030633	1294.2	0.403404	0.0831697	4.85038	1.23226e-06	1.45109e-05	plekhm3
ENSDARG00000005332	516.5	0.648504	0.133717	4.84983	1.2357e-06	1.45306e-05	lipib
ENSDARG00000061201	5387.44	0.262866	0.0542009	4.84985	1.23554e-06	1.45306e-05	acsf2
ENSDARG00000067658	2188.98	0.331712	0.0684165	4.84843	1.24444e-06	1.46228e-05	BX470189.1
ENSDARG00000098683	1305.08	0.43717	0.0902019	4.84657	1.25614e-06	1.47497e-05	zmiz2
ENSDARG00000009796	1188.62	0.403764	0.0834154	4.8404	1.29579e-06	1.52044e-05	klc1a
ENSDARG00000109360	320.782	-0.688217	0.142219	-4.83914	1.30403e-06	1.52902e-05	FO704848.1
ENSDARG00000061159	5065.77	-0.389309	0.0805143	-4.83528	1.32959e-06	1.55787e-05	bicra
ENSDARG00000101952	194.436	-0.90584	0.187414	-4.83337	1.34242e-06	1.57178e-05	pigv
ENSDARG00000069386	271.853	-0.659041	0.136427	-4.83073	1.36033e-06	1.59162e-05	mtg1
ENSDARG00000030844	351.801	-0.571503	0.118344	-4.82916	1.37108e-06	1.60305e-05	klf11a
ENSDARG00000005382	2667.78	-0.423215	0.0876456	-4.8287	1.37426e-06	1.60562e-05	prdm9
ENSDARG00000039125	6099.83	-0.454333	0.0941128	-4.82754	1.38228e-06	1.61384e-05	map4k5
ENSDARG00000103253	222.257	-0.728182	0.15107	-4.82015	1.43448e-06	1.6736e-05	zgc:112023
ENSDARG00000078691	589.922	-0.458341	0.0952484	-4.81206	1.49379e-06	1.74033e-05	gigyf1b
ENSDARG00000087093	670.299	-0.686787	0.142722	-4.81206	1.4938e-06	1.74033e-05	si:ch211-157c3.4
ENSDARG00000034534	607.532	0.473873	0.0985057	4.81062	1.50465e-06	1.75172e-05	atp6v1aa
ENSDARG00000100850	829.216	-0.504528	0.104887	-4.81019	1.50788e-06	1.75423e-05	rnf103
ENSDARG00000052343	138.037	-1.06142	0.220799	-4.80717	1.53082e-06	1.77966e-05	spata18
ENSDARG00000058154	132.982	0.975959	0.203107	4.80514	1.54644e-06	1.79655e-05	znf385c
ENSDARG00000016519	1758.61	-0.485932	0.101135	-4.80479	1.54911e-06	1.79837e-05	ctdnep1a
ENSDARG00000099885	942.595	-0.415183	0.0864802	-4.8009	1.57952e-06	1.83238e-05	trim105
ENSDARG00000013122	964.241	-0.413502	0.0861851	-4.79783	1.60391e-06	1.85924e-05	maf1
ENSDARG00000059556	2233.69	0.31408	0.0654646	4.7977	1.60495e-06	1.85924e-05	recql5
ENSDARG00000086450	530.108	0.491227	0.102424	4.79603	1.61839e-06	1.87349e-05	tdg.2
ENSDARG00000069249	1233.43	-0.421714	0.0879487	-4.79501	1.62671e-06	1.88179e-05	aftpha
ENSDARG00000027279	3421.48	0.312186	0.0651397	4.79257	1.64662e-06	1.90348e-05	numb
ENSDARG00000042835	601.488	-0.549904	0.114756	-4.79196	1.65164e-06	1.90794e-05	tfdp2
ENSDARG00000044956	638.006	0.560555	0.117005	4.79084	1.66082e-06	1.91719e-05	zgc:114123
ENSDARG00000042837	6786.39	0.314506	0.0656521	4.7905	1.66369e-06	1.91916e-05	atp1b3b
ENSDARG00000104889	3954.28	0.411815	0.0860019	4.78844	1.68079e-06	1.93752e-05	kpnb1
ENSDARG00000098782	1117.9	-0.361788	0.0755579	-4.78822	1.68268e-06	1.93833e-05	cratb
ENSDARG00000016811	4379.26	-0.306888	0.0641142	-4.78658	1.6965e-06	1.95288e-05	ints3
ENSDARG00000005891	856.592	-0.424751	0.0888217	-4.78206	1.73505e-06	1.99586e-05	cyb5r3
ENSDARG00000078850	2979.93	-0.34289	0.0717419	-4.77949	1.75741e-06	2.02016e-05	plekhm2
ENSDARG00000075989	2670.17	0.288202	0.0603241	4.77756	1.77432e-06	2.03817e-05	arpc2
ENSDARG00000075824	2188.97	-0.318687	0.0667089	-4.77729	1.77676e-06	2.03954e-05	virma
ENSDARG00000067613	1649.93	0.330111	0.0691082	4.77672	1.78177e-06	2.04386e-05	dnajc25
ENSDARG00000059888	2466.34	-0.338786	0.0709454	-4.77531	1.79427e-06	2.05676e-05	ago3a
ENSDARG00000008461	1534.86	-0.334792	0.0701406	-4.77316	1.81358e-06	2.07744e-05	anapc5
ENSDARG00000013615	286.646	0.889052	0.186385	4.76998	1.84246e-06	2.10905e-05	pbx3b
ENSDARG00000032765	1771.26	0.413148	0.0866332	4.76893	1.85203e-06	2.11852e-05	net1
ENSDARG00000104660	1073.52	0.370637	0.077722	4.76876	1.85366e-06	2.11892e-05	si:ch73-132f6.5
ENSDARG00000070472	1173.85	0.368088	0.0772197	4.76677	1.87204e-06	2.13843e-05	arf5
ENSDARG00000098734	1901.4	-0.32729	0.0686725	-4.76595	1.87964e-06	2.14561e-05	ccdc14
ENSDARG00000075446	9809.25	0.275616	0.0578695	4.76271	1.91007e-06	2.17884e-05	naa25
ENSDARG00000058630	2805.2	-0.444666	0.0933788	-4.76196	1.91719e-06	2.18543e-05	zgc:162472
ENSDARG00000115416	363.943	-0.624802	0.131263	-4.75992	1.93668e-06	2.20612e-05	BX649556.2
ENSDARG00000014386	4374.06	0.261266	0.0549399	4.7555	1.97959e-06	2.25344e-05	galnt6
ENSDARG00000105209	2018.39	-0.341538	0.0718436	-4.7539	1.99526e-06	2.2697e-05	MPRIP
ENSDARG00000093997	268.657	-0.649227	0.136578	-4.75353	1.99893e-06	2.27229e-05	si:dkey-9i23.15
ENSDARG00000044144	3852.75	-0.27393	0.0576315	-4.75313	2.00295e-06	2.27357e-05	wapla
ENSDARG00000053097	1668.68	-0.338505	0.0712165	-4.75318	2.00245e-06	2.27357e-05	hsf2
ENSDARG00000075041	1998.77	0.450028	0.0946829	4.753	2.00421e-06	2.27357e-05	fmnl2b
ENSDARG00000045618	1494.59	0.360652	0.0758856	4.75258	2.00838e-06	2.27672e-05	clta
ENSDARG00000061397	6810.76	0.294829	0.0620555	4.75105	2.0236e-06	2.29238e-05	trip12
ENSDARG00000062266	12808.7	0.24425	0.051452	4.74715	2.06305e-06	2.33546e-05	edc4
ENSDARG00000018397	564.928	-0.559053	0.117801	-4.74575	2.07734e-06	2.35002e-05	hpca
ENSDARG00000074790	1201.03	0.373532	0.0787192	4.74511	2.08388e-06	2.35579e-05	rab5if
ENSDARG00000062058	2339.91	-0.381433	0.0803879	-4.7449	2.08608e-06	2.35665e-05	slc12a7b
ENSDARG00000002970	5311.11	0.2873	0.0605549	4.74446	2.09063e-06	2.36016e-05	ss18
ENSDARG00000006791	2203.9	-0.339354	0.0715313	-4.74413	2.09405e-06	2.3624e-05	arntl1a
ENSDARG00000079036	74.8628	1.25167	0.263868	4.74354	2.10015e-06	2.36765e-05	znfl1k
ENSDARG00000094977	2774.78	-0.317564	0.0669689	-4.74197	2.11649e-06	2.38443e-05	si:ch211-156j22.4
ENSDARG00000102736	961.694	0.451141	0.0951503	4.74135	2.12296e-06	2.39008e-05	sars2
ENSDARG00000057303	1382.27	0.342572	0.0722699	4.74018	2.13533e-06	2.4007e-05	galnt7
ENSDARG00000100742	433.504	-0.527014	0.111178	-4.74027	2.1343e-06	2.4007e-05	reep5
ENSDARG00000103337	3213.78	0.36784	0.0776101	4.73958	2.14158e-06	2.40609e-05	rrp1
ENSDARG00000086808	888.897	-0.622772	0.131414	-4.73902	2.14756e-06	2.41115e-05	ddhd1a
ENSDARG00000056621	19187.7	0.308755	0.0651597	4.73843	2.15381e-06	2.41651e-05	ctcf
ENSDARG00000076914	45.1431	1.68995	0.356702	4.73769	2.16166e-06	2.42366e-05	lacc1
ENSDARG00000005561	156.036	-0.803369	0.169688	-4.73439	2.19714e-06	2.46176e-05	gfm2
ENSDARG00000101061	610.97	0.465711	0.0984087	4.73242	2.21862e-06	2.48413e-05	eif2a
ENSDARG00000016968	5513.55	0.30818	0.0651888	4.72749	2.27308e-06	2.54337e-05	tmem214
ENSDARG00000012929	581.368	-0.479883	0.101541	-4.72601	2.28973e-06	2.56025e-05	eif2d
ENSDARG00000037393	3048.57	0.337905	0.0715095	4.72531	2.29766e-06	2.56736e-05	slc43a1a
ENSDARG00000080009	364.667	0.731276	0.154781	4.72459	2.30577e-06	2.57467e-05	bahcc1b
ENSDARG00000076229	2033.72	-0.535172	0.113293	-4.72379	2.31494e-06	2.58316e-05	mrtfab
ENSDARG00000068484	891.063	0.451166	0.0955982	4.71939	2.36549e-06	2.63776e-05	CABZ01100185.1
ENSDARG00000051975	296.623	0.652769	0.138346	4.71836	2.37751e-06	2.64937e-05	cd99
ENSDARG00000034270	2801.03	0.304818	0.0646447	4.71529	2.41372e-06	2.68789e-05	ogdha
ENSDARG00000079753	107.843	1.04268	0.221165	4.71447	2.42339e-06	2.69682e-05	kiz
ENSDARG00000074094	1052.09	1.29456	0.274847	4.71009	2.47608e-06	2.75359e-05	tgm2b
ENSDARG00000098820	1539.04	0.333612	0.0708361	4.70963	2.48165e-06	2.75791e-05	ftr67
ENSDARG00000063577	320.132	-0.715124	0.151889	-4.70822	2.49895e-06	2.77525e-05	klhl35
ENSDARG00000016084	2745.18	-0.330753	0.0702773	-4.7064	2.52124e-06	2.79433e-05	spsb4a
ENSDARG00000024895	1167.66	0.376358	0.0799665	4.70645	2.52065e-06	2.79433e-05	fam50a
ENSDARG00000098021	688.061	-0.513946	0.109201	-4.70644	2.52086e-06	2.79433e-05	si:dkey-111k8.2
ENSDARG00000091433	1105.88	-0.357765	0.0760534	-4.70413	2.54947e-06	2.82371e-05	abhd17aa
ENSDARG00000017312	679.111	-0.44638	0.0949616	-4.70063	2.59359e-06	2.87064e-05	lmbrd2b
ENSDARG00000059906	5629.14	0.298489	0.06351	4.69988	2.60316e-06	2.87928e-05	sdc4
ENSDARG00000026682	977.436	-0.602442	0.128257	-4.69715	2.63812e-06	2.91598e-05	zgc:101583
ENSDARG00000037917	182.057	0.76955	0.16391	4.69497	2.66646e-06	2.94334e-05	itga3a
ENSDARG00000058220	396.899	-0.637044	0.135686	-4.69499	2.66626e-06	2.94334e-05	tada3l
ENSDARG00000057529	90.0598	1.16684	0.248577	4.69407	2.67826e-06	2.95438e-05	itpa
ENSDARG00000016651	4747.28	0.285768	0.0608957	4.69275	2.69554e-06	2.97144e-05	znf106a
ENSDARG00000012021	1626.58	0.35037	0.0746876	4.69114	2.71683e-06	2.99289e-05	kdsr
ENSDARG00000039517	1247.51	-0.375246	0.0799975	-4.69072	2.72243e-06	2.99705e-05	c8b
ENSDARG00000069378	1091.97	0.395667	0.0843597	4.69024	2.7288e-06	3.00205e-05	pard6a
ENSDARG00000074331	7382.93	-0.372853	0.0794993	-4.69002	2.73184e-06	3.00337e-05	eif4g3b
ENSDARG00000078768	1391.78	0.423049	0.090315	4.68415	2.81124e-06	3.0886e-05	abhd15a
ENSDARG00000028379	279.49	0.753844	0.160965	4.68328	2.82327e-06	3.09974e-05	trub2
ENSDARG00000018559	641.87	-0.43774	0.0934954	-4.68195	2.84162e-06	3.1178e-05	kdm7ab
ENSDARG00000073881	141.752	0.903251	0.192998	4.68012	2.86711e-06	3.14365e-05	slc41a2b
ENSDARG00000053165	125.615	-0.913774	0.195284	-4.6792	2.87998e-06	3.15565e-05	CR382385.1
ENSDARG00000056387	1972.19	-0.338037	0.072275	-4.67709	2.90979e-06	3.18619e-05	rnf17
ENSDARG00000061417	762.807	0.606727	0.129771	4.67536	2.93431e-06	3.2109e-05	nub1
ENSDARG00000053459	630.697	-0.518218	0.110857	-4.67467	2.94432e-06	3.2197e-05	rybpb
ENSDARG00000031720	892.227	0.633686	0.135647	4.67157	2.98906e-06	3.26644e-05	clstn1
ENSDARG00000078752	532.643	0.501094	0.10732	4.66916	3.02436e-06	3.30282e-05	rubcn
ENSDARG00000100280	150.676	-0.929446	0.199072	-4.6689	3.02816e-06	3.30477e-05	znfx1
ENSDARG00000091777	353.137	-0.573668	0.122888	-4.66822	3.03817e-06	3.31349e-05	mapkap1
ENSDARG00000077911	567.971	0.459098	0.0984066	4.66532	3.08145e-06	3.35845e-05	treh
ENSDARG00000040237	707.739	0.460598	0.098738	4.66485	3.08843e-06	3.36383e-05	mef2d
ENSDARG00000089858	346.606	0.605839	0.129897	4.66401	3.10101e-06	3.37529e-05	cobll1a
ENSDARG00000036282	217.596	-0.745647	0.159905	-4.66305	3.1155e-06	3.3888e-05	rnaset2
ENSDARG00000039754	3557.92	0.298769	0.0640833	4.66221	3.12836e-06	3.40054e-05	xpc
ENSDARG00000111107	259.291	-0.670054	0.143875	-4.6572	3.20535e-06	3.48192e-05	CT009620.1
ENSDARG00000062146	787.545	0.433017	0.0929912	4.65654	3.21574e-06	3.49089e-05	larp4b
ENSDARG00000087954	420.812	-0.514558	0.110519	-4.65582	3.22691e-06	3.50069e-05	rac1b
ENSDARG00000086034	376.43	0.567679	0.121939	4.65543	3.23308e-06	3.50507e-05	nectin1b
ENSDARG00000058349	645.974	-0.451445	0.0969754	-4.65526	3.23575e-06	3.50564e-05	polr2l
ENSDARG00000030805	184.264	0.770982	0.165628	4.65489	3.24156e-06	3.50962e-05	znhit2
ENSDARG00000098075	2327.33	0.298043	0.0640303	4.65472	3.24416e-06	3.51011e-05	sh3bgrl3
ENSDARG00000018618	4196.51	0.290004	0.0623082	4.65435	3.25011e-06	3.51423e-05	cpsf6
ENSDARG00000079992	843.062	-0.4189	0.0900063	-4.65412	3.25371e-06	3.51581e-05	senp6b
ENSDARG00000093093	711.952	-0.445407	0.0957468	-4.65193	3.2885e-06	3.55106e-05	adam17b
ENSDARG00000076839	1514.9	0.33184	0.0713828	4.64873	3.33978e-06	3.60406e-05	ftr86
ENSDARG00000099722	407.4	-0.534026	0.114907	-4.64747	3.36031e-06	3.62383e-05	zgc:153993
ENSDARG00000057928	1707.76	0.365572	0.0787194	4.64399	3.41749e-06	3.68307e-05	mzt2b
ENSDARG00000111877	2619.95	-0.379495	0.0817513	-4.64207	3.44935e-06	3.71496e-05	bcl7ba
ENSDARG00000055383	1315.56	-0.346899	0.0747319	-4.64192	3.45186e-06	3.71522e-05	zgc:66160
ENSDARG00000078335	2528.21	0.318014	0.0685205	4.64116	3.46461e-06	3.72651e-05	amot
ENSDARG00000103915	860.055	0.650503	0.140165	4.64097	3.46771e-06	3.72739e-05	ero1b
ENSDARG00000069980	4035.86	0.277567	0.0598118	4.64067	3.47284e-06	3.73046e-05	lman1
ENSDARG00000074804	351.977	-0.684025	0.14743	-4.63967	3.48969e-06	3.74611e-05	atxn7
ENSDARG00000104938	5509.36	0.314366	0.0677896	4.63737	3.52869e-06	3.78549e-05	ftsj3
ENSDARG00000099491	2900.47	-0.273561	0.0590178	-4.63523	3.56532e-06	3.82229e-05	tmem176l.1
ENSDARG00000033861	494.664	0.503773	0.108692	4.63488	3.57151e-06	3.82642e-05	sepsecs
ENSDARG00000020201	3512.67	-0.324709	0.0700677	-4.63422	3.58293e-06	3.83487e-05	cdc73
ENSDARG00000095946	145.508	-0.827982	0.17867	-4.63415	3.58408e-06	3.83487e-05	si:ch73-341k19.1
ENSDARG00000070618	9888.01	-0.257518	0.0555755	-4.63366	3.59256e-06	3.84143e-05	tatdn2
ENSDARG00000000086	3197.19	0.282253	0.0609637	4.62986	3.65916e-06	3.9101e-05	itsn1
ENSDARG00000109373	393.749	-0.586545	0.126692	-4.62969	3.66208e-06	3.91067e-05	tmbim1b
ENSDARG00000074807	309.698	-0.601013	0.129867	-4.62791	3.69369e-06	3.94186e-05	tbrg4
ENSDARG00000002127	3144.13	-0.321658	0.0695122	-4.62737	3.70346e-06	3.94972e-05	stam
ENSDARG00000023600	712.443	-0.523271	0.113096	-4.62679	3.71382e-06	3.95818e-05	sh3gl2a
ENSDARG00000094616	922.084	0.528012	0.114126	4.62655	3.71802e-06	3.96009e-05	zgc:113984
ENSDARG00000100053	262.454	0.677364	0.146423	4.62607	3.72667e-06	3.96673e-05	CABZ01044099.1
ENSDARG00000052741	306.513	0.616877	0.133356	4.62578	3.73199e-06	3.96981e-05	card11
ENSDARG00000008757	1968.31	0.302437	0.0654018	4.6243	3.75868e-06	3.99561e-05	entpd6
ENSDARG00000059064	2228.15	0.402857	0.0871282	4.62373	3.76901e-06	4.00399e-05	rassf3
ENSDARG00000038097	1355.95	-0.349318	0.0755673	-4.62261	3.7895e-06	4.02315e-05	pigq
ENSDARG00000038870	4155.81	-0.275596	0.0596307	-4.62172	3.80578e-06	4.03782e-05	slu7
ENSDARG00000103700	34.6319	-1.70225	0.368328	-4.62156	3.80865e-06	4.03825e-05	si:ch211-239d6.2
ENSDARG00000008238	707.559	0.438195	0.0948269	4.621	3.81892e-06	4.04653e-05	manba
ENSDARG00000035122	1511.74	-0.460031	0.099568	-4.62027	3.8325e-06	4.05829e-05	camsap1b
ENSDARG00000070132	27.6414	-1.96098	0.424508	-4.61942	3.84823e-06	4.07232e-05	aste1a
ENSDARG00000003206	565.917	-0.478623	0.103676	-4.6165	3.90257e-06	4.12716e-05	chchd6a
ENSDARG00000002006	603.68	0.504085	0.10923	4.61491	3.93258e-06	4.15622e-05	rxrbb
ENSDARG00000041586	869.12	-0.4766	0.103292	-4.6141	3.94803e-06	4.16985e-05	dhx40
ENSDARG00000099379	378.128	-0.593516	0.128716	-4.61106	4.00621e-06	4.22858e-05	ppp4r1l
ENSDARG00000042141	107.643	1.07725	0.233701	4.60953	4.03583e-06	4.2571e-05	myo6b
ENSDARG00000044567	805.577	0.427003	0.0926688	4.60784	4.06876e-06	4.28907e-05	ttc1
ENSDARG00000002377	1384.52	0.366651	0.0795871	4.60691	4.08703e-06	4.30359e-05	mief2
ENSDARG00000014556	180.898	0.789406	0.171354	4.60687	4.08778e-06	4.30359e-05	serpinb1l3
ENSDARG00000076857	24.1339	-2.1267	0.461672	-4.60652	4.09461e-06	4.30801e-05	her3
ENSDARG00000039302	1369.07	0.471775	0.10245	4.60492	4.12625e-06	4.33851e-05	terfa
ENSDARG00000020239	49.6576	-1.42537	0.309738	-4.60185	4.18756e-06	4.40016e-05	lpin1
ENSDARG00000040707	296.176	-0.615297	0.133722	-4.60132	4.19829e-06	4.40861e-05	chchd4b
ENSDARG00000027079	363.966	0.871948	0.189563	4.59979	4.22923e-06	4.43825e-05	znf804a
ENSDARG00000036100	3255.78	0.28205	0.0613423	4.59798	4.26611e-06	4.47409e-05	eya3
ENSDARG00000043453	2168.52	0.390603	0.0850019	4.59523	4.32274e-06	4.52769e-05	rps5
ENSDARG00000076174	1035.33	0.381664	0.0830554	4.5953	4.32125e-06	4.52769e-05	trim2b
ENSDARG00000021833	1180.55	0.570042	0.124055	4.59509	4.32553e-06	4.52772e-05	ahr2
ENSDARG00000078683	37.5556	-1.65701	0.360722	-4.5936	4.35667e-06	4.55741e-05	RNF14 (1 of many)
ENSDARG00000043797	9846.65	0.276372	0.0601759	4.59274	4.37473e-06	4.57338e-05	cdc5l
ENSDARG00000042791	848.61	-0.404784	0.0881607	-4.59144	4.40201e-06	4.59896e-05	git2b
ENSDARG00000068148	3025.77	-0.346856	0.0755606	-4.59044	4.42312e-06	4.61807e-05	arrdc1a
ENSDARG00000015540	517.477	-0.495158	0.107871	-4.59029	4.42639e-06	4.61855e-05	psen2
ENSDARG00000010255	1575.65	0.342111	0.0745413	4.58956	4.4419e-06	4.63179e-05	bin2b
ENSDARG00000078653	520.689	0.496022	0.108267	4.58145	4.61756e-06	4.81189e-05	ralbp1
ENSDARG00000104341	325.023	-0.569505	0.124362	-4.57942	4.66259e-06	4.85573e-05	si:ch211-76m11.8
ENSDARG00000057151	1552.06	0.327875	0.0716018	4.57915	4.66868e-06	4.85898e-05	prep
ENSDARG00000061468	11273.6	0.296376	0.0647422	4.57779	4.69921e-06	4.88766e-05	ncaph
ENSDARG00000071336	92.6455	-1.13745	0.248513	-4.57704	4.71611e-06	4.89591e-05	mif
ENSDARG00000096851	220.212	-0.690868	0.150935	-4.57724	4.71141e-06	4.89591e-05	znf1143
ENSDARG00000097692	1227.92	-0.409222	0.089407	-4.57707	4.71529e-06	4.89591e-05	si:ch211-116o3.5
ENSDARG00000094757	285.269	0.598785	0.130874	4.57528	4.7558e-06	4.93399e-05	CR788311.1
ENSDARG00000008142	1246.73	0.344509	0.0753074	4.57471	4.76891e-06	4.94446e-05	stxbp3
ENSDARG00000096628	3451.99	-0.346866	0.0758786	-4.57133	4.84644e-06	5.02167e-05	buc2l
ENSDARG00000096017	150.601	0.844351	0.184824	4.56841	4.91431e-06	5.08878e-05	BX649337.1
ENSDARG00000002601	394.195	0.512652	0.11227	4.56622	4.96598e-06	5.13903e-05	irx7
ENSDARG00000099528	5391.53	0.273827	0.0599749	4.56569	4.97864e-06	5.14889e-05	dus3l
ENSDARG00000094107	884.908	-0.381455	0.0835878	-4.56353	5.03003e-06	5.19876e-05	si:ch73-37h15.2
ENSDARG00000057513	3315.8	-0.449719	0.0985687	-4.56249	5.05504e-06	5.21803e-05	mdm4
ENSDARG00000103978	1184.94	0.365853	0.0801849	4.56261	5.05206e-06	5.21803e-05	sh3bp5b
ENSDARG00000104538	1401.83	0.363063	0.0795914	4.56159	5.07682e-06	5.2372e-05	tmem184a
ENSDARG00000038787	3286.58	0.30967	0.0679099	4.56002	5.11499e-06	5.27327e-05	tmub1
ENSDARG00000007737	2710.08	0.328525	0.072077	4.55798	5.16491e-06	5.32138e-05	zyg11
ENSDARG00000037142	91.5132	-1.05255	0.230978	-4.55692	5.19095e-06	5.34485e-05	zgc:153146
ENSDARG00000018658	770.26	0.527063	0.115692	4.55576	5.21965e-06	5.37103e-05	aar2
ENSDARG00000087421	2472.84	-0.399623	0.0877323	-4.55502	5.23801e-06	5.38423e-05	serbp1b
ENSDARG00000102048	118.563	-0.898905	0.197346	-4.55498	5.23904e-06	5.38423e-05	slc25a43
ENSDARG00000036257	8656.43	-0.420358	0.0923327	-4.55265	5.29747e-06	5.44086e-05	rasal2
ENSDARG00000018110	7945.4	0.278727	0.0612525	4.55047	5.35274e-06	5.49418e-05	pak4
ENSDARG00000059812	7907.54	-0.387165	0.0851766	-4.54544	5.48202e-06	5.62336e-05	sin3ab
ENSDARG00000052827	938.368	-0.45671	0.100489	-4.54486	5.49723e-06	5.63544e-05	top3a
ENSDARG00000087647	4372.18	-0.253551	0.0557922	-4.54456	5.50493e-06	5.6398e-05	sept7a
ENSDARG00000102587	5998.67	0.240327	0.0528902	4.54389	5.52257e-06	5.65434e-05	mios
ENSDARG00000076526	3763.5	-0.256658	0.0565115	-4.54169	5.58055e-06	5.70807e-05	gar1
ENSDARG00000077368	346.256	-0.572896	0.126143	-4.54163	5.58201e-06	5.70807e-05	slc30a6
ENSDARG00000092610	1576.31	-0.339777	0.0748403	-4.54002	5.62481e-06	5.74825e-05	lamp1b
ENSDARG00000006889	827.766	0.381037	0.0839551	4.53858	5.66337e-06	5.78404e-05	mpped2a
ENSDARG00000013329	949.237	0.408497	0.0900376	4.53696	5.70713e-06	5.82511e-05	ttc5
ENSDARG00000009169	702.593	-0.454445	0.100188	-4.53593	5.73509e-06	5.85001e-05	mob1ba
ENSDARG00000003599	5006.11	0.310535	0.0684686	4.53544	5.7484e-06	5.85994e-05	rpl3
ENSDARG00000021891	159.775	0.830414	0.183163	4.53373	5.79508e-06	5.90018e-05	zbtb7b
ENSDARG00000061684	165.719	0.773628	0.170638	4.53374	5.79473e-06	5.90018e-05	slc25a17
ENSDARG00000102891	692.662	0.431432	0.0951926	4.5322	5.83732e-06	5.9395e-05	ppp1r26
ENSDARG00000014008	8335.02	0.30337	0.0669519	4.53117	5.8659e-06	5.96487e-05	cwc22
ENSDARG00000102731	1027.38	-0.381655	0.0842464	-4.53023	5.89206e-06	5.98776e-05	si:ch73-299h12.2
ENSDARG00000057918	3529.42	0.302907	0.0668689	4.52986	5.9022e-06	5.99436e-05	tsc1b
ENSDARG00000031382	8315.07	0.258443	0.0570834	4.52746	5.96976e-06	6.05921e-05	reep2
ENSDARG00000051857	1200.17	-0.45618	0.100801	-4.52555	6.02392e-06	6.1104e-05	tes
ENSDARG00000017320	6253.76	0.255828	0.0565377	4.52492	6.04189e-06	6.12313e-05	f11r.1
ENSDARG00000035682	1135.94	0.467016	0.103212	4.52485	6.04394e-06	6.12313e-05	FP102018.1
ENSDARG00000035285	14285.1	0.254404	0.0562369	4.52379	6.07429e-06	6.15008e-05	ncor1
ENSDARG00000023999	9588.38	0.249077	0.0550711	4.52282	6.10197e-06	6.17429e-05	heatr5a
ENSDARG00000078615	2958.3	0.326477	0.0722026	4.52168	6.13515e-06	6.20404e-05	USP53 (1 of many)
ENSDARG00000008333	347.568	0.590292	0.130586	4.52033	6.17432e-06	6.23979e-05	znfl2a
ENSDARG00000016496	3581.29	-0.285761	0.0632421	-4.51852	6.2274e-06	6.28956e-05	cdk8
ENSDARG00000088123	5268.04	0.260374	0.0576422	4.51708	6.26977e-06	6.32845e-05	znf217
ENSDARG00000018600	980.554	-0.37526	0.0830889	-4.51637	6.29095e-06	6.34592e-05	retsat
ENSDARG00000059373	1733.33	0.417034	0.0923438	4.51611	6.29868e-06	6.34981e-05	dnajc8
ENSDARG00000104311	161.708	-0.84143	0.186371	-4.51483	6.33691e-06	6.38442e-05	scmh1
ENSDARG00000100198	255.141	0.625009	0.138487	4.51312	6.38821e-06	6.43216e-05	sncaip
ENSDARG00000014113	1122.94	-0.376746	0.0834955	-4.51217	6.41663e-06	6.45681e-05	wasla
ENSDARG00000014545	47.5152	-1.3754	0.305159	-4.50715	6.57055e-06	6.60763e-05	golim4b
ENSDARG00000016721	2084.16	-0.305628	0.0678225	-4.50629	6.59699e-06	6.61798e-05	sdha
ENSDARG00000033009	1585.1	0.314687	0.0698285	4.50657	6.58839e-06	6.61798e-05	h3f3c
ENSDARG00000061024	1799.29	0.346477	0.0768835	4.50653	6.58975e-06	6.61798e-05	rabggta
ENSDARG00000092473	797.484	-0.417096	0.0925565	-4.5064	6.59374e-06	6.61798e-05	apopt1
ENSDARG00000006487	3395.57	0.295193	0.0655177	4.50554	6.62036e-06	6.63737e-05	anp32a
ENSDARG00000077299	1032.6	0.35491	0.0787947	4.50424	6.6611e-06	6.67413e-05	yars2
ENSDARG00000103746	2119.5	0.296991	0.0659934	4.50031	6.78557e-06	6.79469e-05	mapkbp1
ENSDARG00000030465	2287.15	0.307911	0.0684338	4.4994	6.8144e-06	6.81523e-05	tmem263
ENSDARG00000104414	472.251	0.545748	0.121292	4.49945	6.81301e-06	6.81523e-05	shmt2
ENSDARG00000053113	7430.9	-0.277293	0.0616565	-4.49739	6.87934e-06	6.87599e-05	ly75
ENSDARG00000113761	880.51	0.460342	0.102366	4.49703	6.89105e-06	6.88349e-05	CABZ01072607.1
ENSDARG00000006624	1247.8	-0.408723	0.0909204	-4.4954	6.94403e-06	6.93219e-05	ppp2r2ab
ENSDARG00000057167	21082.1	0.233553	0.0519871	4.49251	7.03875e-06	7.02247e-05	eif4g2b
ENSDARG00000025081	3520.39	0.315495	0.0702388	4.49174	7.06423e-06	7.0436e-05	grnb
ENSDARG00000075331	6806.11	0.260139	0.0579324	4.49039	7.10942e-06	7.08435e-05	golga4
ENSDARG00000036966	454.455	-0.571684	0.127338	-4.4895	7.13917e-06	7.10968e-05	hsd3b7
ENSDARG00000024314	2139.37	-0.44063	0.0982058	-4.4868	7.22998e-06	7.19574e-05	herpud1
ENSDARG00000007804	463.011	0.559029	0.124601	4.48655	7.23867e-06	7.20001e-05	gas6
ENSDARG00000016143	729.092	0.404826	0.0902521	4.48551	7.27407e-06	7.23084e-05	xiap
ENSDARG00000029639	4156.26	0.259048	0.0577699	4.48414	7.32099e-06	7.27307e-05	tomm70a
ENSDARG00000062472	7707.92	0.282316	0.0629925	4.48174	7.40356e-06	7.35064e-05	sin3b
ENSDARG00000088844	125.372	0.954395	0.213001	4.48071	7.43945e-06	7.3818e-05	deaf1
ENSDARG00000075560	646.21	0.439815	0.098182	4.47959	7.47856e-06	7.41612e-05	kmt2cb
ENSDARG00000018022	3982.16	0.290643	0.0649134	4.47739	7.55604e-06	7.48843e-05	msh2
ENSDARG00000092732	398.05	-0.731771	0.163472	-4.47642	7.59062e-06	7.51815e-05	si:ch73-256j6.5
ENSDARG00000037154	936.906	-0.489894	0.109455	-4.47577	7.61354e-06	7.5363e-05	hivep3b
ENSDARG00000007369	1137.18	0.49435	0.110525	4.47273	7.72286e-06	7.63989e-05	tcf7l1b
ENSDARG00000014137	583.098	-0.445788	0.099683	-4.47206	7.7471e-06	7.65926e-05	picalmb
ENSDARG00000038909	153.174	0.842071	0.188417	4.4692	7.85136e-06	7.75765e-05	msl2a
ENSDARG00000025522	924.612	-0.389688	0.0872027	-4.46876	7.86732e-06	7.76874e-05	sgk1
ENSDARG00000060618	1080.06	-0.351703	0.078728	-4.46732	7.92064e-06	7.81668e-05	ipo13
ENSDARG00000107385	490.839	0.474052	0.106141	4.46626	7.95979e-06	7.84881e-05	aars2
ENSDARG00000109289	497.278	-0.459159	0.102808	-4.46618	7.96277e-06	7.84881e-05	mrps15
ENSDARG00000035987	106.384	-0.9206	0.206146	-4.46576	7.97833e-06	7.85942e-05	psmg2
ENSDARG00000044253	160.562	-0.832556	0.186523	-4.46355	8.06124e-06	7.93632e-05	paqr3b
ENSDARG00000089598	250.201	-0.640185	0.14362	-4.45749	8.29265e-06	8.15925e-05	si:cabz01054396.2
ENSDARG00000026225	16648.2	-0.355963	0.0799946	-4.44983	8.59378e-06	8.45047e-05	nsd2
ENSDARG00000014239	431.276	0.635505	0.142854	4.44862	8.64236e-06	8.49314e-05	esyt1b
ENSDARG00000099814	271.946	0.615817	0.138464	4.44748	8.68839e-06	8.53326e-05	FBXO46
ENSDARG00000013441	407.86	-0.556709	0.125226	-4.44564	8.76324e-06	8.60162e-05	hey2
ENSDARG00000056648	716.18	0.417376	0.0938926	4.44525	8.77882e-06	8.60457e-05	ext2
ENSDARG00000059604	5573.34	0.256304	0.0576598	4.4451	8.78497e-06	8.60457e-05	mtss1
ENSDARG00000060207	3148.53	-0.395653	0.0890098	-4.44505	8.78724e-06	8.60457e-05	traf7
ENSDARG00000074634	886.464	0.527419	0.118645	4.44536	8.77432e-06	8.60457e-05	keap1b
ENSDARG00000005927	997.517	-0.355315	0.080035	-4.43949	9.01708e-06	8.82436e-05	tbc1d17
ENSDARG00000024708	130.899	-1.04587	0.235611	-4.43895	9.03975e-06	8.84126e-05	slc25a23b
ENSDARG00000089461	294.066	-0.629704	0.141877	-4.43839	9.06352e-06	8.85923e-05	ciz1b
ENSDARG00000056830	2709.99	-0.26341	0.0593592	-4.43757	9.09822e-06	8.88784e-05	si:ch211-107m4.1
ENSDARG00000006585	262.543	-0.605169	0.136411	-4.43637	9.14884e-06	8.93197e-05	DMWD
ENSDARG00000075567	701.949	-0.414892	0.0936296	-4.4312	9.37095e-06	9.14337e-05	fbxl20
ENSDARG00000079610	845.998	0.428541	0.0967338	4.4301	9.4188e-06	9.18459e-05	akap9
ENSDARG00000053260	408.572	-0.569094	0.128468	-4.42985	9.42986e-06	9.1899e-05	zgc:113090
ENSDARG00000112581	467.06	0.510979	0.115364	4.42925	9.45597e-06	9.20988e-05	TMEM87B
ENSDARG00000055655	487.653	0.479401	0.108305	4.42638	9.58268e-06	9.32775e-05	birc5b
ENSDARG00000060954	1868.17	-0.415867	0.0939646	-4.42579	9.6092e-06	9.34801e-05	tmcc1b
ENSDARG00000007449	2045.62	0.321461	0.0726363	4.42562	9.61635e-06	9.34942e-05	slc25a39
ENSDARG00000037070	26.6916	-1.93775	0.437987	-4.42422	9.67922e-06	9.40497e-05	tmem242
ENSDARG00000036147	2392.09	-0.440772	0.0996467	-4.42334	9.71857e-06	9.4376e-05	ano5b
ENSDARG00000060671	187.638	0.808777	0.182909	4.42174	9.79094e-06	9.50225e-05	lct
ENSDARG00000020442	2485.81	0.306916	0.0694214	4.42106	9.82165e-06	9.52642e-05	snx5
ENSDARG00000051956	251.726	-0.618503	0.140021	-4.4172	9.99869e-06	9.69241e-05	isca1
ENSDARG00000078942	838.187	0.422699	0.0957101	4.41645	1.00335e-05	9.72044e-05	enox2
ENSDARG00000017266	365.451	-0.57516	0.130371	-4.41171	1.02556e-05	9.9297e-05	scml4
ENSDARG00000004754	1820.25	0.297965	0.0675465	4.41126	1.0277e-05	9.94459e-05	hspa4a
ENSDARG00000039347	1072.03	-0.409346	0.092872	-4.40764	1.04504e-05	0.000101063	rps24
ENSDARG00000055502	1399.37	0.376405	0.0854745	4.40371	1.06413e-05	0.000102849	cicb
ENSDARG00000073822	86.1678	-1.05898	0.240506	-4.40312	1.06704e-05	0.000103069	LO017700.1
ENSDARG00000086881	90.6738	1.03519	0.235178	4.40175	1.07382e-05	0.000103663	ier2b
ENSDARG00000032575	9231.16	0.227701	0.0517329	4.40148	1.07514e-05	0.00010373	ywhaz
ENSDARG00000095890	1784.17	-0.326119	0.0741586	-4.39759	1.0946e-05	0.000105483	znf236
ENSDARG00000098766	3192.5	-0.361751	0.0822602	-4.39764	1.09434e-05	0.000105483	pcxa
ENSDARG00000021827	1495.93	-0.390875	0.0888967	-4.39696	1.09778e-05	0.000105728	katna1
ENSDARG00000070892	240.024	-0.764916	0.174013	-4.39575	1.10392e-05	0.000106194	si:ch211-262h13.5
ENSDARG00000107912	502.362	-0.453057	0.103066	-4.39578	1.10377e-05	0.000106194	FIG4
ENSDARG00000027046	7829.15	-0.317907	0.0723548	-4.39373	1.11422e-05	0.000107122	scyl3
ENSDARG00000100906	104.008	0.956045	0.217622	4.39314	1.11724e-05	0.000107349	hist1h2a11
ENSDARG00000063538	331.702	-0.545419	0.124228	-4.39047	1.13105e-05	0.000108613	kalrnb
ENSDARG00000019442	309.371	-0.54576	0.124317	-4.39006	1.13317e-05	0.000108752	CABZ01086041.1
ENSDARG00000099779	979.671	-0.494351	0.112621	-4.38949	1.13616e-05	0.000108975	si:ch211-11n16.2
ENSDARG00000052893	51.1189	1.45803	0.332486	4.38523	1.15863e-05	0.000111041	rx3
ENSDARG00000103551	65.5861	-1.18375	0.269944	-4.38515	1.15905e-05	0.000111041	rnf213b
ENSDARG00000078802	7464.15	-0.379336	0.0865766	-4.38151	1.17859e-05	0.000112716	rnf111
ENSDARG00000094154	106.373	0.900106	0.205425	4.38169	1.17763e-05	0.000112716	hist2h3c
ENSDARG00000109996	329.316	0.5397	0.123173	4.38163	1.17794e-05	0.000112716	CABZ01101996.1
ENSDARG00000036956	4027.58	0.258309	0.0589664	4.38062	1.18341e-05	0.00011311	asxl1
ENSDARG00000070122	333.24	0.547609	0.125032	4.37975	1.18816e-05	0.000113499	stk11ip
ENSDARG00000086670	696.264	-0.466032	0.106429	-4.37882	1.19325e-05	0.000113919	ice2
ENSDARG00000045513	1498.25	0.375739	0.0858423	4.37708	1.20278e-05	0.000114628	taf3
ENSDARG00000067670	2137.67	-0.287414	0.0656617	-4.37719	1.20217e-05	0.000114628	pomt1
ENSDARG00000105452	2290.81	0.299409	0.0684035	4.3771	1.20266e-05	0.000114628	plxna1a
ENSDARG00000063021	1219.07	0.36707	0.083985	4.37066	1.23869e-05	0.000117982	rpain
ENSDARG00000041332	873.737	-0.375687	0.0859858	-4.36917	1.24717e-05	0.000118721	tmem33
ENSDARG00000087688	844.397	0.452563	0.103601	4.36834	1.25194e-05	0.000119105	klhl29
ENSDARG00000004774	4718.71	0.241322	0.055251	4.36774	1.25538e-05	0.000119363	wdr36
ENSDARG00000053500	143.87	-0.834951	0.191213	-4.3666	1.26194e-05	0.000119917	cbsa
ENSDARG00000014915	180.507	0.778331	0.178382	4.36327	1.2813e-05	0.000121687	ndufab1b
ENSDARG00000069538	2002.95	-0.382023	0.0875901	-4.36149	1.2918e-05	0.000122613	gtf3c4
ENSDARG00000026519	3368.95	0.288541	0.0662401	4.35599	1.32466e-05	0.000125658	ralgps2
ENSDARG00000030357	637.211	-0.408989	0.0939015	-4.35551	1.32757e-05	0.000125862	zgc:66313
ENSDARG00000104018	1204.85	0.368005	0.0845137	4.35438	1.33443e-05	0.000126439	mtpn
ENSDARG00000116457	61.0855	-1.2679	0.291241	-4.35344	1.34017e-05	0.00012691	zmp:0000001088
ENSDARG00000052693	758.461	-0.455331	0.104641	-4.35136	1.35297e-05	0.000128048	si:dkey-172m14.1
ENSDARG00000020289	11048.3	-0.364487	0.0837884	-4.35008	1.36086e-05	0.000128646	pif1
ENSDARG00000110963	72.4653	1.36423	0.313603	4.35018	1.36026e-05	0.000128646	trib1
ENSDARG00000027099	4687.36	0.275032	0.0632344	4.3494	1.36511e-05	0.000128973	psmc4
ENSDARG00000044811	3840.21	0.265247	0.0609947	4.34869	1.36954e-05	0.000129317	cdk9
ENSDARG00000071583	6851.76	-0.268742	0.061846	-4.34533	1.39064e-05	0.000131234	gtf3ab
ENSDARG00000033489	2569.38	-0.300417	0.0691436	-4.34482	1.39388e-05	0.000131464	ube2j1
ENSDARG00000103134	1387.24	0.331561	0.0763191	4.3444	1.39656e-05	0.000131641	zgc:65873
ENSDARG00000042646	138.397	0.941054	0.216702	4.34262	1.40792e-05	0.000132636	zgc:77784
ENSDARG00000006301	1607.69	0.314862	0.0725407	4.34049	1.42167e-05	0.000133854	raph1a
ENSDARG00000004114	325.054	-0.575268	0.132546	-4.34013	1.424e-05	0.000133997	tti1
ENSDARG00000010792	15237.4	-0.21791	0.0502114	-4.33985	1.42582e-05	0.000134014	cdc25b
ENSDARG00000055078	92.6701	-0.990049	0.228124	-4.33996	1.42507e-05	0.000134014	chac2
ENSDARG00000014670	107.063	0.982289	0.22644	4.33797	1.43805e-05	0.000135086	colgalt2
ENSDARG00000036844	869.732	0.488572	0.112639	4.33752	1.44099e-05	0.000135285	tsen54
ENSDARG00000017272	2844.55	0.338112	0.0779644	4.33675	1.44602e-05	0.00013568	eapp
ENSDARG00000014050	13.0437	3.27591	0.755447	4.33639	1.44845e-05	0.00013583	ngfb
ENSDARG00000096983	397.463	-0.516445	0.119251	-4.33073	1.48616e-05	0.000139286	si:dkeyp-19h3.8
ENSDARG00000043511	1119.67	0.365974	0.084511	4.33049	1.48777e-05	0.000139357	prdx6
ENSDARG00000001249	851.175	-0.385737	0.0890787	-4.3303	1.48909e-05	0.000139401	pcgf1
ENSDARG00000003087	374.268	-0.560493	0.129444	-4.33	1.49112e-05	0.000139512	ubxn6
ENSDARG00000103317	3870.45	0.270316	0.0624366	4.32945	1.49483e-05	0.000139779	capn5a
ENSDARG00000114067	890.915	-0.420628	0.0971682	-4.32887	1.49879e-05	0.00014007	tspan17
ENSDARG00000102960	2081.51	0.286523	0.0662043	4.32786	1.50562e-05	0.000140627	vps54
ENSDARG00000060192	482.078	0.552415	0.127652	4.32752	1.50798e-05	0.000140768	rpusd1
ENSDARG00000074137	1815.18	-0.36833	0.0851204	-4.32717	1.51038e-05	0.000140912	c2cd3
ENSDARG00000091937	34.9386	-1.7499	0.404446	-4.32667	1.51382e-05	0.000141152	BX927308.1
ENSDARG00000008068	898.932	0.474343	0.109655	4.32579	1.51986e-05	0.000141635	tma16
ENSDARG00000011404	2829.81	0.26475	0.0612095	4.32531	1.52319e-05	0.000141864	fen1
ENSDARG00000020841	3343.85	0.26208	0.0606174	4.32351	1.53566e-05	0.000142864	rbm7
ENSDARG00000056922	74.1866	1.12536	0.260287	4.32353	1.53555e-05	0.000142864	ltbp1
ENSDARG00000101869	3913.19	0.251592	0.0582016	4.32277	1.5408e-05	0.00014326	magi3a
ENSDARG00000075793	4349.22	0.281508	0.065128	4.32239	1.5435e-05	0.00014343	prex1
ENSDARG00000070390	1481.78	0.336728	0.0779568	4.31942	1.5644e-05	0.000145289	flad1
ENSDARG00000062517	48.6232	1.43815	0.333189	4.31633	1.58645e-05	0.000147254	si:ch211-107n13.1
ENSDARG00000056334	843.898	-0.40336	0.0934979	-4.3141	1.60253e-05	0.000148578	mlh3
ENSDARG00000087779	4162.31	0.25899	0.0600327	4.31414	1.60223e-05	0.000148578	pum3
ENSDARG00000053453	309.073	-0.66677	0.154575	-4.31357	1.60641e-05	0.000148854	mpp2a
ENSDARG00000057672	1089.3	0.378468	0.0877469	4.31318	1.60925e-05	0.000149033	plpp5
ENSDARG00000037872	4292.03	0.251059	0.0582111	4.3129	1.61125e-05	0.000149134	foxk1
ENSDARG00000090013	158.894	0.806559	0.187073	4.31147	1.62169e-05	0.000150016	ccdc9b
ENSDARG00000036060	938.105	0.38694	0.0897493	4.31135	1.62263e-05	0.000150018	exosc6
ENSDARG00000068940	591.1	-0.423386	0.0982333	-4.31	1.63253e-05	0.000150848	atp5meb
ENSDARG00000094597	637.461	-0.570872	0.132478	-4.3092	1.63846e-05	0.000151311	CR383662.2
ENSDARG00000044584	862.878	0.411985	0.0956092	4.30905	1.63956e-05	0.000151327	tex261
ENSDARG00000063005	1229.03	0.317215	0.073634	4.30799	1.64742e-05	0.000151967	anapc7
ENSDARG00000088383	972.61	0.374421	0.0869297	4.30717	1.65353e-05	0.000152445	cox5aa
ENSDARG00000016260	6183.67	0.265236	0.0615861	4.30675	1.65671e-05	0.000152652	fxr2
ENSDARG00000055753	6010.63	-0.238616	0.0554585	-4.3026	1.68802e-05	0.00015545	suv39h1b
ENSDARG00000007824	190.174	0.793029	0.184329	4.30224	1.69079e-05	0.000155618	camta1b
ENSDARG00000020847	1545.31	0.334213	0.0776979	4.30144	1.69695e-05	0.000156096	atp6v0a1a
ENSDARG00000007760	102.395	-0.932252	0.21688	-4.29846	1.71985e-05	0.000158115	spg21
ENSDARG00000003085	224.172	0.770512	0.179343	4.29631	1.73666e-05	0.00015957	stambpl1
ENSDARG00000099693	100.758	-0.954221	0.222144	-4.29551	1.74291e-05	0.000159979	AL935065.1
ENSDARG00000100274	1034.44	0.345564	0.080448	4.29549	1.74306e-05	0.000159979	CABZ01045062.1
ENSDARG00000014159	4982.98	0.239541	0.0557756	4.29472	1.74912e-05	0.000160445	mtdha
ENSDARG00000114766	521.498	-0.45419	0.105866	-4.29023	1.78485e-05	0.000163631	CU928847.1
ENSDARG00000035564	6203.08	-0.271068	0.0631949	-4.2894	1.79155e-05	0.000164153	dgcr8
ENSDARG00000026796	30.1545	-1.79125	0.417689	-4.28848	1.799e-05	0.000164744	grm1a
ENSDARG00000027418	901.684	-0.527618	0.123057	-4.2876	1.80612e-05	0.000165304	trappc4
ENSDARG00000018871	150.317	0.743006	0.173308	4.28721	1.80934e-05	0.000165506	henmt1
ENSDARG00000062612	2176.44	0.284928	0.0664929	4.28509	1.82662e-05	0.000166993	dhx37
ENSDARG00000002790	2292.13	0.280902	0.0656082	4.28151	1.8563e-05	0.000169518	ap2m1a
ENSDARG00000035023	1773.86	0.367431	0.085818	4.28152	1.85624e-05	0.000169518	khdc4
ENSDARG00000077546	1011.88	-0.463933	0.108369	-4.28107	1.85998e-05	0.000169759	zdhhc1
ENSDARG00000045036	3744.66	-0.253425	0.0592044	-4.28051	1.86464e-05	0.00017009	cdc42ep4b
ENSDARG00000021140	147.212	0.958136	0.22388	4.27969	1.87155e-05	0.000170625	pabpc1b
ENSDARG00000098141	901.406	0.404086	0.0944267	4.27937	1.87427e-05	0.000170778	supt3h
ENSDARG00000002267	3762.46	-0.238644	0.0557837	-4.27802	1.88559e-05	0.000171715	dcaf13
ENSDARG00000101458	2910.84	0.337152	0.0788174	4.27763	1.88894e-05	0.000171924	r3hdm1
ENSDARG00000044290	111.671	0.858247	0.200819	4.27373	1.92231e-05	0.000174864	rph3al
ENSDARG00000087363	162.37	-0.741028	0.173525	-4.27044	1.95091e-05	0.000177367	si:dkeyp-46h3.6
ENSDARG00000045696	110.135	-0.892597	0.209053	-4.26971	1.95724e-05	0.000177844	mrpl23
ENSDARG00000073841	4131.17	0.277761	0.0650824	4.26784	1.97376e-05	0.000179246	herc2
ENSDARG00000020676	2649.87	0.277621	0.0650593	4.26719	1.97946e-05	0.000179664	dpp3
ENSDARG00000077631	95.9431	-0.947087	0.221967	-4.2668	1.98296e-05	0.000179882	CU459089.1
ENSDARG00000071021	559.168	0.471457	0.110533	4.26531	1.99626e-05	0.000180989	papss2a
ENSDARG00000052114	403.404	0.572694	0.134313	4.26387	2.00921e-05	0.000182061	crtc3
ENSDARG00000074695	532.045	-0.472272	0.110767	-4.26365	2.01111e-05	0.000182133	mertka
ENSDARG00000056167	150.034	0.781622	0.183397	4.26191	2.02688e-05	0.00018346	hspe1
ENSDARG00000022254	1713.37	0.294222	0.069045	4.26131	2.03234e-05	0.000183853	prkcbb
ENSDARG00000026453	5208.88	-0.254204	0.0596664	-4.26042	2.04043e-05	0.000184483	zgc:66474
ENSDARG00000100025	199.138	0.7369	0.173055	4.25819	2.06086e-05	0.000186227	si:ch211-231f6.6
ENSDARG00000102362	3898.16	0.241127	0.0566295	4.25798	2.06286e-05	0.000186305	slc25a12
ENSDARG00000071143	73.4541	-1.06615	0.250408	-4.25765	2.06584e-05	0.000186471	si:dkey-208m12.2
ENSDARG00000030177	1688.34	-0.323614	0.0760648	-4.25445	2.09565e-05	0.000189058	uchl3
ENSDARG00000100773	3453.9	-0.282133	0.0663226	-4.25395	2.10034e-05	0.000189377	zmynd19
ENSDARG00000036816	1304.72	0.331497	0.0779632	4.25196	2.11906e-05	0.00019096	pou2f2a
ENSDARG00000055969	1251.88	-0.33008	0.0776406	-4.25138	2.12454e-05	0.000191304	rfc3
ENSDARG00000086453	41.3514	1.44039	0.338821	4.25119	2.12638e-05	0.000191304	cx52.9
ENSDARG00000092503	1565.08	0.312585	0.0735274	4.25127	2.1256e-05	0.000191304	arid1b
ENSDARG00000010032	22.44	-2.17405	0.511697	-4.24869	2.1502e-05	0.000193235	cmtm7
ENSDARG00000033738	2557.6	0.278223	0.0654835	4.24875	2.14966e-05	0.000193235	MYL6 (1 of many)
ENSDARG00000003381	559.658	-0.492888	0.11606	-4.24686	2.1679e-05	0.000194719	si:ch211-266g18.6
ENSDARG00000075509	3915.8	0.357837	0.0842658	4.24653	2.17108e-05	0.000194898	phf12b
ENSDARG00000040009	931.654	0.455325	0.107246	4.24562	2.1799e-05	0.000195583	palld
ENSDARG00000074663	325.176	0.644782	0.151878	4.24539	2.1821e-05	0.000195673	zgc:162183
ENSDARG00000070570	7256.74	-0.306149	0.0721472	-4.24339	2.20166e-05	0.000197319	ppp4ca
ENSDARG00000004131	1625.17	-0.344078	0.0811093	-4.24216	2.21382e-05	0.000198301	rttn
ENSDARG00000032161	310.684	0.665187	0.156829	4.24147	2.22058e-05	0.000198797	srgap2
ENSDARG00000027803	431.798	-0.49304	0.116285	-4.23992	2.23596e-05	0.000200064	sbds
ENSDARG00000014474	2335.32	-0.37146	0.0876268	-4.23911	2.24409e-05	0.000200683	yipf1
ENSDARG00000078654	27107.6	0.208243	0.0491286	4.23874	2.24781e-05	0.000200906	tpx2
ENSDARG00000006642	1350.15	-0.334976	0.0790347	-4.23833	2.25186e-05	0.000201158	drg2
ENSDARG00000011783	4015.85	-0.340072	0.0802755	-4.23631	2.27225e-05	0.000202869	stag2a
ENSDARG00000060921	838	-0.401785	0.0948591	-4.23559	2.27949e-05	0.000203404	pla2g6
ENSDARG00000095504	492.519	-0.435644	0.102864	-4.23513	2.2842e-05	0.000203714	si:ch211-167j6.3
ENSDARG00000076988	1783.68	0.312984	0.0739402	4.23293	2.30663e-05	0.000205602	znf839
ENSDARG00000010145	590.391	0.422688	0.0998872	4.23165	2.3198e-05	0.000206664	tor4aa
ENSDARG00000005643	1880.53	0.444216	0.105026	4.22959	2.34119e-05	0.000208457	gcat
ENSDARG00000055938	789.307	-0.395429	0.0935038	-4.22902	2.3471e-05	0.000208869	tspan14
ENSDARG00000100352	202.076	-0.759629	0.179639	-4.22865	2.35097e-05	0.0002091	aglb
ENSDARG00000016532	8405.98	-0.231407	0.0547451	-4.22699	2.36834e-05	0.00021047	suco
ENSDARG00000077300	3320.05	-0.39093	0.0924854	-4.22694	2.36894e-05	0.00021047	usp42
ENSDARG00000016464	3099.37	-0.310494	0.0734818	-4.22545	2.3846e-05	0.000211747	cdc42bpab
ENSDARG00000060411	676.329	-0.595927	0.141065	-4.2245	2.39472e-05	0.000212415	ddx28
ENSDARG00000076025	288.559	-0.749378	0.177387	-4.22454	2.3943e-05	0.000212415	dgkzb
ENSDARG00000101441	2038.9	0.300857	0.0712551	4.22225	2.41877e-05	0.000214432	lima1a
ENSDARG00000037403	143.644	-1.01968	0.241512	-4.22207	2.42069e-05	0.000214487	si:dkey-4p15.3
ENSDARG00000025854	942.071	0.341556	0.0809279	4.2205	2.43763e-05	0.00021587	ddx51
ENSDARG00000003754	875.783	-0.433551	0.102729	-4.22032	2.43958e-05	0.000215927	tspan2a
ENSDARG00000078317	98.0584	-0.95361	0.226002	-4.21949	2.4486e-05	0.000216608	si:dkey-175m17.7
ENSDARG00000044525	508.074	-0.499538	0.118441	-4.21763	2.46889e-05	0.000218125	pparda
ENSDARG00000055857	1746.2	0.307592	0.072931	4.21758	2.46937e-05	0.000218125	dop1b
ENSDARG00000100633	1140.76	-0.318063	0.0754142	-4.21755	2.46974e-05	0.000218125	zgc:114200
ENSDARG00000097255	79.2954	1.01893	0.241727	4.21521	2.49548e-05	0.00022028	si:dkey-77f5.13
ENSDARG00000040046	875.827	-0.403582	0.0958311	-4.21138	2.53811e-05	0.000223922	snai2
ENSDARG00000023815	1213.96	-0.340866	0.080952	-4.21072	2.54559e-05	0.000224461	uvrag
ENSDARG00000020798	575.765	0.408902	0.0971239	4.2101	2.55255e-05	0.000224954	necap1
ENSDARG00000043480	809.203	-0.50726	0.12053	-4.20856	2.57e-05	0.00022637	rbbp8
ENSDARG00000075571	1315.08	-0.363376	0.0863613	-4.20762	2.58072e-05	0.000227192	bicd2
ENSDARG00000059832	667.927	-0.511808	0.121709	-4.20516	2.60897e-05	0.000229471	adgrb3
ENSDARG00000086840	2864.8	-0.305779	0.072716	-4.20512	2.60941e-05	0.000229471	si:ch211-266k8.4
ENSDARG00000002523	2019.91	0.311718	0.0742113	4.20041	2.66426e-05	0.000234169	hsdl2
ENSDARG00000061504	2397.8	-0.272048	0.0648001	-4.19827	2.68959e-05	0.000236269	kdm4c
ENSDARG00000009342	7214.64	0.229769	0.0547393	4.19751	2.69867e-05	0.00023694	txndc5
ENSDARG00000090764	2537.74	0.277066	0.0660356	4.1957	2.72034e-05	0.000238714	bcas3
ENSDARG00000116814	2474.36	-0.269881	0.064332	-4.19513	2.7272e-05	0.000239188	CU570894.2
ENSDARG00000045199	4835.89	-0.307727	0.073376	-4.19384	2.7427e-05	0.000240303	zgc:55262
ENSDARG00000062469	1143.87	-0.427778	0.102002	-4.19383	2.74284e-05	0.000240303	hipk3a
ENSDARG00000038243	2220.79	-0.269533	0.064302	-4.19167	2.76906e-05	0.000242471	e4f1
ENSDARG00000117545	299.27	0.564399	0.13467	4.19099	2.77745e-05	0.000243075	CABZ01066320.1
ENSDARG00000060102	6057.84	0.314014	0.0749588	4.18915	2.80002e-05	0.00024492	kank1a
ENSDARG00000115646	148.2	0.726355	0.173415	4.18854	2.80761e-05	0.000245452	CR846082.1
ENSDARG00000100596	39.7967	1.45678	0.347993	4.18624	2.8361e-05	0.000247811	si:ch73-43g23.1
ENSDARG00000043816	1036.05	0.459456	0.109786	4.18501	2.85159e-05	0.000249032	st6galnac1.2
ENSDARG00000027916	1751.22	-0.295323	0.070573	-4.18465	2.85607e-05	0.00024929	fntb
ENSDARG00000016212	4029.66	0.279658	0.0668501	4.18336	2.8723e-05	0.000250574	nup214
ENSDARG00000026811	4642.84	0.230086	0.0550058	4.18295	2.87756e-05	0.000250899	extl3
ENSDARG00000090770	898.196	-0.37612	0.0899484	-4.18151	2.89584e-05	0.000252358	FO834800.1
ENSDARG00000001169	188.518	0.668916	0.159987	4.18107	2.90136e-05	0.000252571	hsd17b8
ENSDARG00000002235	62.7921	-1.10749	0.264875	-4.18116	2.90023e-05	0.000252571	mmp14a
ENSDARG00000012788	517.734	1.21645	0.290972	4.18064	2.90685e-05	0.000252915	foxa3
ENSDARG00000044551	408.181	-0.546021	0.130613	-4.18046	2.90921e-05	0.000252986	atg9a
ENSDARG00000002949	1750.74	-0.324581	0.0776505	-4.18002	2.91485e-05	0.000253341	ppp6c
ENSDARG00000036073	645.519	-0.422634	0.101114	-4.17979	2.91781e-05	0.000253464	cebpg
ENSDARG00000062326	856.397	0.382425	0.0915702	4.17631	2.96277e-05	0.000257234	hmgn7
ENSDARG00000061864	250.169	0.56658	0.13575	4.17371	2.99677e-05	0.000260048	hdlbpb
ENSDARG00000015199	733.064	-0.412895	0.0989639	-4.17217	3.0171e-05	0.000261674	cblb
ENSDARG00000045598	471.522	-0.568486	0.136331	-4.16991	3.04719e-05	0.000264144	AKR1B1 (1 of many)
ENSDARG00000007278	1198.49	0.332318	0.0797102	4.16907	3.0584e-05	0.000264975	ect2
ENSDARG00000040623	140.382	-0.856125	0.205357	-4.16895	3.06006e-05	0.000264979	fosl2
ENSDARG00000012982	2668.24	0.284449	0.0682617	4.16704	3.08575e-05	0.000267063	nf1a
ENSDARG00000054746	3897.77	0.28439	0.068263	4.16609	3.09863e-05	0.000268035	uggt1
ENSDARG00000097347	29.9483	-1.66697	0.400166	-4.1657	3.10395e-05	0.000268354	CR854965.2
ENSDARG00000042440	189.262	-0.691479	0.166066	-4.16388	3.1288e-05	0.00027036	p2rx7
ENSDARG00000061986	448.033	-0.455531	0.109412	-4.16345	3.13474e-05	0.00027073	tbc1d2b
ENSDARG00000062352	1609.1	0.285354	0.0685432	4.16313	3.13913e-05	0.000270953	sema4ab
ENSDARG00000071868	1085.75	0.376747	0.0904984	4.16302	3.14062e-05	0.000270953	znf711
ENSDARG00000060348	656.471	-0.408692	0.0982	-4.16183	3.15711e-05	0.000272233	map3k3
ENSDARG00000004672	2416.67	0.290566	0.0698528	4.15969	3.18687e-05	0.000274221	ptk2ab
ENSDARG00000097013	73.9186	1.01791	0.244699	4.15985	3.18452e-05	0.000274221	BX649300.1
ENSDARG00000102855	3018.27	0.266205	0.0639933	4.15989	3.18406e-05	0.000274221	neo1a
ENSDARG00000107096	34.6561	-1.57537	0.378716	-4.15976	3.18585e-05	0.000274221	castor1
ENSDARG00000042637	388.731	0.554592	0.133345	4.15907	3.19542e-05	0.000274813	tert
ENSDARG00000057671	372.099	-0.517779	0.1245	-4.15886	3.19838e-05	0.000274923	epas1b
ENSDARG00000020834	1321.83	-0.376544	0.0905749	-4.15727	3.22078e-05	0.000276704	si:dkey-230p4.1
ENSDARG00000007377	9949.48	0.375531	0.0903365	4.15702	3.22419e-05	0.000276851	odc1
ENSDARG00000039338	223.071	-0.626129	0.150644	-4.15636	3.23354e-05	0.000277446	gadd45gip1
ENSDARG00000068367	878.506	-0.443515	0.106709	-4.1563	3.2345e-05	0.000277446	nfkbie
ENSDARG00000086150	1790.31	0.274625	0.0660763	4.15617	3.23624e-05	0.00027745	wrap53
ENSDARG00000054032	439.403	0.459099	0.110473	4.15575	3.24224e-05	0.000277819	rab24
ENSDARG00000005827	3990.26	0.246193	0.0592441	4.15557	3.24482e-05	0.000277895	eif2s1a
ENSDARG00000102308	1697.37	-0.367743	0.088499	-4.15534	3.24807e-05	0.000278028	ttc39c
ENSDARG00000023443	2607.28	-0.284856	0.0685652	-4.15452	3.2597e-05	0.000278878	tjp2b
ENSDARG00000009724	2010.15	-0.316232	0.0761226	-4.15424	3.26369e-05	0.000279073	rpn2
ENSDARG00000105626	301.583	0.54691	0.131679	4.15337	3.27619e-05	0.000279996	adad2
ENSDARG00000038731	105.11	-0.873303	0.210335	-4.15196	3.29634e-05	0.000281572	slc25a36a
ENSDARG00000109202	204.699	-0.648397	0.156257	-4.14955	3.3313e-05	0.00028441	BX324216.3
ENSDARG00000059323	9641.57	0.267098	0.0643749	4.1491	3.33785e-05	0.00028482	rpn1
ENSDARG00000003307	288.824	-0.561591	0.135379	-4.14829	3.34962e-05	0.000285676	stx16
ENSDARG00000032631	334.254	0.509267	0.122803	4.14702	3.3683e-05	0.00028712	ltb4r
ENSDARG00000021346	447.522	-0.442275	0.106657	-4.14671	3.3728e-05	0.000287354	pdhb
ENSDARG00000100549	311.962	0.510859	0.123248	4.14498	3.39848e-05	0.000289392	TMEM38B
ENSDARG00000086324	52.6528	-1.20915	0.291806	-4.14368	3.41772e-05	0.000290879	si:dkey-274m17.3
ENSDARG00000063573	337.425	-0.567485	0.137022	-4.14155	3.44968e-05	0.000293437	vps41
ENSDARG00000079930	305.99	0.559681	0.135142	4.14144	3.45136e-05	0.000293437	si:dkeyp-68b7.5
ENSDARG00000079717	2641.06	0.261208	0.0630806	4.14086	3.46011e-05	0.000294028	rbm12b
ENSDARG00000092849	2283.22	-0.271127	0.0654806	-4.14056	3.46456e-05	0.000294254	si:ch73-92e7.4
ENSDARG00000046143	377.874	0.52292	0.126353	4.13855	3.49501e-05	0.000296687	prkab1b
ENSDARG00000077410	4729.88	0.238318	0.0576032	4.13723	3.51518e-05	0.000298244	myo9b
ENSDARG00000061373	1069.78	-0.419828	0.101494	-4.13647	3.52691e-05	0.000299085	znf142
ENSDARG00000029402	1957.41	0.282829	0.0683816	4.13604	3.53351e-05	0.00029949	sort1a
ENSDARG00000076017	142.473	0.802205	0.193978	4.13554	3.5412e-05	0.000299987	tmem69
ENSDARG00000076466	1385.23	0.298722	0.0722481	4.13468	3.55457e-05	0.000300963	maml1
ENSDARG00000021120	9673.44	0.232552	0.0562601	4.13351	3.57259e-05	0.000302333	ndc1
ENSDARG00000016044	537.842	0.463287	0.112126	4.13186	3.59843e-05	0.000304363	gins4
ENSDARG00000052471	922.631	0.333566	0.0807672	4.12997	3.62807e-05	0.000306553	taf1a
ENSDARG00000070084	954.816	0.374461	0.0906668	4.13008	3.62634e-05	0.000306553	phf10
ENSDARG00000113411	960.317	0.428705	0.103839	4.12854	3.65074e-05	0.00030831	lrrc4c
ENSDARG00000036893	230.924	0.692235	0.167735	4.12696	3.67586e-05	0.000310271	f13a1b
ENSDARG00000068868	1235.83	-0.402595	0.0975801	-4.12579	3.6946e-05	0.000311692	nap1l4b
ENSDARG00000098059	38.9274	-1.44753	0.350881	-4.12542	3.70053e-05	0.000312033	fkbp3
ENSDARG00000060537	5681.98	0.241196	0.0584773	4.12461	3.71367e-05	0.000312979	atad2b
ENSDARG00000070119	564.451	0.448888	0.108854	4.12376	3.72739e-05	0.000313974	ctc1
ENSDARG00000019763	25645.5	0.27166	0.0658928	4.12277	3.7435e-05	0.000315008	acp5a
ENSDARG00000061335	134.184	0.770537	0.186894	4.12285	3.74211e-05	0.000315008	galnt1
ENSDARG00000015856	459.792	-0.471395	0.114351	-4.12235	3.75033e-05	0.00031542	slc25a40
ENSDARG00000100371	36502.5	0.289044	0.0701318	4.12143	3.7652e-05	0.000316509	eef2b
ENSDARG00000027391	183.612	0.728814	0.176876	4.12048	3.78083e-05	0.00031766	ccnd3
ENSDARG00000033234	14.0876	-2.67546	0.64949	-4.11932	3.79985e-05	0.000319094	stmn2a
ENSDARG00000043566	1309.51	-0.301633	0.0732675	-4.11687	3.84048e-05	0.000322341	nepro
ENSDARG00000027500	2281.19	0.263169	0.0639325	4.11636	3.849e-05	0.000322891	oxsr1b
ENSDARG00000008383	2989.71	0.252143	0.0612691	4.11534	3.86616e-05	0.000323809	arpc1a
ENSDARG00000018241	3333.3	0.286295	0.0695673	4.11537	3.86556e-05	0.000323809	mfap1
ENSDARG00000021846	234.527	-0.592997	0.144098	-4.11524	3.86785e-05	0.000323809	hid1a
ENSDARG00000060594	3573.59	-0.354829	0.0862177	-4.1155	3.86344e-05	0.000323809	hadhab
ENSDARG00000077839	970.827	0.397338	0.096561	4.11489	3.87365e-05	0.000324129	dhx30
ENSDARG00000035607	1835.76	0.316211	0.0768541	4.11443	3.88139e-05	0.000324611	ankle2
ENSDARG00000060288	613.933	0.455084	0.110684	4.11155	3.93007e-05	0.000328514	plpbp
ENSDARG00000090942	662.143	-0.377886	0.0919138	-4.11131	3.93417e-05	0.000328689	CABZ01054394.1
ENSDARG00000044899	230.692	-0.652795	0.158785	-4.11117	3.93653e-05	0.00032872	tmem183a
ENSDARG00000036420	465.505	-0.480889	0.116975	-4.11103	3.939e-05	0.000328758	si:dkey-33c9.6
ENSDARG00000077788	1567.05	0.317437	0.0772352	4.11001	3.95645e-05	0.000330046	arhgef10
ENSDARG00000021509	3955.57	0.289381	0.0704166	4.10955	3.96424e-05	0.000330528	tab2
ENSDARG00000091187	513.69	-0.430915	0.104866	-4.1092	3.97027e-05	0.000330863	BX649250.1
ENSDARG00000036116	64.1372	1.12692	0.274289	4.1085	3.98232e-05	0.000331698	eif3hb
ENSDARG00000078073	1537.48	-0.326149	0.0794077	-4.10727	4.00369e-05	0.000333309	nudt5
ENSDARG00000006044	180.909	0.860592	0.209613	4.10562	4.03237e-05	0.000335526	ust
ENSDARG00000057096	234.701	0.603879	0.1471	4.10523	4.03915e-05	0.00033592	ndr1
ENSDARG00000007976	2740.85	0.267636	0.0652301	4.10295	4.07909e-05	0.000339069	si:ch211-220f16.2
ENSDARG00000038069	377.486	0.505327	0.123209	4.10137	4.10704e-05	0.000341219	mgat3a
ENSDARG00000101508	1204.13	0.345638	0.0842822	4.10096	4.11438e-05	0.000341657	nr6a1a
ENSDARG00000102744	269.58	0.559877	0.13653	4.10075	4.11816e-05	0.000341797	mgst3a
ENSDARG00000004906	9256.43	0.227197	0.055408	4.10044	4.12365e-05	0.000342079	stip1
ENSDARG00000040338	767.001	0.372394	0.0908866	4.09735	4.17912e-05	0.000346331	hvcn1
ENSDARG00000062347	413.932	-0.49574	0.120988	-4.09744	4.17753e-05	0.000346331	mtus2a
ENSDARG00000103612	223.636	0.607303	0.148264	4.0961	4.20168e-05	0.000348024	akt2l
ENSDARG00000027159	828.823	0.356279	0.0869885	4.0957	4.209e-05	0.000348455	fbxo28
ENSDARG00000075543	28089.5	0.226992	0.0554272	4.09533	4.21573e-05	0.000348836	chd8
ENSDARG00000101894	978.688	0.333599	0.0814819	4.09415	4.23714e-05	0.00035043	stk10
ENSDARG00000025595	365.62	-0.51028	0.124688	-4.09247	4.26803e-05	0.000352807	agmo
ENSDARG00000075349	2221.73	-0.346224	0.0846054	-4.09222	4.2726e-05	0.000353006	si:ch73-138n13.1
ENSDARG00000098544	1419.29	0.307264	0.0751182	4.0904	4.30622e-05	0.000355605	ncdn
ENSDARG00000054666	125.719	-0.830197	0.202971	-4.09022	4.3096e-05	0.000355705	pgpep1
ENSDARG00000098822	2702.48	0.260428	0.0637482	4.08526	4.40268e-05	0.000363205	tcerg1a
ENSDARG00000017844	706.433	0.442407	0.108317	4.08439	4.41929e-05	0.000364391	copz1
ENSDARG00000056601	1022.31	-0.342719	0.0839148	-4.08413	4.42428e-05	0.000364619	plekha3
ENSDARG00000087536	664.906	0.387578	0.0949117	4.08356	4.43506e-05	0.000365324	znf407
ENSDARG00000114334	28.9581	1.6635	0.407387	4.08334	4.4393e-05	0.000365489	HIST2H3A (1 of many)
ENSDARG00000016396	386.148	-0.522804	0.128053	-4.08272	4.45107e-05	0.000366275	fam219aa
ENSDARG00000045277	457.574	0.455178	0.1115	4.08231	4.45903e-05	0.000366746	rdh12l
ENSDARG00000059856	113.748	-0.805373	0.197308	-4.08181	4.46866e-05	0.000367353	alkbh2
ENSDARG00000025218	5675.81	0.247196	0.0606091	4.07852	4.53226e-05	0.000372395	myo5ab
ENSDARG00000026348	635.728	-0.474495	0.11639	-4.07677	4.56659e-05	0.000375028	csad
ENSDARG00000029075	1436.8	0.306326	0.0751583	4.07575	4.5867e-05	0.00037649	pfkfb4b
ENSDARG00000052344	1039.96	-0.334053	0.081973	-4.07516	4.59832e-05	0.000377256	tbl3
ENSDARG00000090872	683.604	0.368363	0.090403	4.07468	4.60778e-05	0.000377843	si:dkey-276j7.1
[truncated: 22,452 more rows]

## Sheet: S1_2
gene ID	baseMean	log2FoldChange	lfcSE	stat	pvalue	padj	external_gene_name
ENSDARG00000000002	4.21716	-1.5722	1.1835	-1.32843	0.184035	0.476686	ccdc80
ENSDARG00000000018	3527.41	0.4024	0.160448	2.50798	0.0121423	0.0843222	nrf1
ENSDARG00000000019	363.012	-0.0225601	0.160595	-0.140479	0.888282	0.960772	ube2h
ENSDARG00000000068	581.4	0.356118	0.155715	2.28698	0.0221968	0.129231	slc9a3r1a
ENSDARG00000000069	834.755	-0.350461	0.163322	-2.14583	0.0318864	0.165897	dap
ENSDARG00000000086	1658.88	-0.283314	0.158356	-1.78909	0.0735996	0.280138	itsn1
ENSDARG00000000103	3253.64	-0.49685	0.259897	-1.91172	0.055912	0.236134	myh10
ENSDARG00000000142	105.618	0.733163	0.255948	2.8645	0.00417671	0.0393591	tmem267
ENSDARG00000000151	43.8249	-0.386215	0.328814	-1.17457	0.240167	0.549482	thraa
ENSDARG00000000161	68.286	0.247403	0.279204	0.886101	0.375563	0.680553	itsn2a
ENSDARG00000000175	2.73533	-3.17979	1.38266	-2.29976	0.021462	NA	hoxb2a
ENSDARG00000000183	435.211	-0.365475	0.136785	-2.6719	0.00754227	0.0606371	ptpn4b
ENSDARG00000000189	199.339	0.848269	0.244307	3.47214	0.000516329	0.00765988	sema6e
ENSDARG00000000212	19497.9	0.478096	0.127128	3.76076	0.000169398	0.00316207	krt97
ENSDARG00000000229	356.194	-0.247346	0.13369	-1.85016	0.0642911	0.256661	usp49
ENSDARG00000000241	26.0347	-0.302479	0.526701	-0.574291	0.565771	0.812321	slc40a1
ENSDARG00000000324	305.87	-0.252097	0.142743	-1.76608	0.0773818	0.289408	dcaf8
ENSDARG00000000349	4.08939	-0.759406	1.05542	-0.719533	0.471813	0.75143	cfap300
ENSDARG00000000369	4.35052	0.92003	0.962914	0.955464	0.339343	0.651407	prkag3b
ENSDARG00000000370	983.646	-0.742908	0.236306	-3.14384	0.00166744	0.0191042	triob
ENSDARG00000000380	99.378	0.187321	0.255581	0.732921	0.463607	0.7447	pde6a
ENSDARG00000000394	16927.8	-0.133145	0.0993273	-1.34047	0.180093	0.470933	matr3l1.1
ENSDARG00000000423	78.1755	0.110127	0.225549	0.488261	0.625365	0.84435	si:ch73-314g15.3
ENSDARG00000000442	850.796	0.113732	0.135551	0.83904	0.401447	0.698409	slc39a13
ENSDARG00000000472	145.106	0.723488	0.298066	2.42728	0.0152126	0.099142	cntn2
ENSDARG00000000474	0.250059	2.19987	4.03239	0.54555	0.585375	NA	NA
ENSDARG00000000476	464.842	-0.137647	0.151786	-0.906848	0.364487	0.672027	pms1
ENSDARG00000000489	1712.42	0.115007	0.103389	1.11237	0.265979	0.576568	upf3b
ENSDARG00000000503	2.9276	-1.99988	1.74049	-1.14903	0.250544	NA	stx1b
ENSDARG00000000516	47.0786	0.399926	0.346665	1.15364	0.248648	0.559385	ankar
ENSDARG00000000529	551.476	0.0295167	0.159544	0.185006	0.853224	0.94753	ofd1
ENSDARG00000000540	2082.45	-0.348193	0.152549	-2.28251	0.0224595	0.130249	asdurf
ENSDARG00000000542	1981.86	-0.228303	0.104008	-2.19505	0.0281601	0.152322	gtf2e1
ENSDARG00000000551	58.0168	-1.09591	0.322983	-3.3931	0.000691058	0.00971362	slc1a4
ENSDARG00000000563	8077.82	-0.729276	0.226511	-3.2196	0.00128369	0.0157266	ttn.1
ENSDARG00000000567	7332.64	-0.0910133	0.132328	-0.687786	0.491588	0.765321	znf281a
ENSDARG00000000568	979.967	0.0287819	0.125476	0.229382	0.818572	0.931788	ell
ENSDARG00000000588	369.179	0.115935	0.186787	0.620681	0.534809	0.793324	grasp
ENSDARG00000000606	47.0196	-0.501034	0.298243	-1.67995	0.0929663	0.323035	dnah6
ENSDARG00000000631	2011.35	-0.0189104	0.190321	-0.0993603	0.920852	0.971199	ptpn4a
ENSDARG00000000638	0.792419	-1.29072	2.60592	-0.495302	0.620387	NA	opn1mw4
ENSDARG00000000651	93.3443	0.179373	0.25952	0.691173	0.489457	0.763893	osgepl1
ENSDARG00000000656	0.308798	-2.22879	3.99103	-0.55845	0.576537	NA	psmb9a
ENSDARG00000000666	64.5041	-1.17624	0.277733	-4.23516	2.28392e-05	0.000593174	creg2
ENSDARG00000000690	98.784	-0.188387	0.364994	-0.516139	0.605757	0.834521	sypl2b
ENSDARG00000000729	3914.36	-0.0667433	0.0832193	-0.802016	0.422544	0.713611	daxx
ENSDARG00000000730	401.496	-0.143717	0.197183	-0.728852	0.466092	0.74608	slc6a22.1
ENSDARG00000000747	335.871	0.0769928	0.15721	0.489745	0.624314	0.843899	lcmt2
ENSDARG00000000760	87.9156	0.220403	0.205478	1.07264	0.283434	0.595579	znf511
ENSDARG00000000767	2.53037	0.147015	1.16457	0.12624	0.899542	NA	spi1b
ENSDARG00000000779	967.54	-0.157225	0.121521	-1.29381	0.195731	0.492518	scfd1
ENSDARG00000000796	53.3647	-0.0682262	0.340704	-0.200251	0.841285	0.942924	nr4a1
ENSDARG00000000804	30.0543	0.104106	0.677215	0.153727	0.877825	0.957335	rassf6
ENSDARG00000000830	741.544	-0.167301	0.120796	-1.38499	0.166057	0.452372	telo2
ENSDARG00000000837	16.0841	-0.0605551	0.51051	-0.118617	0.905579	0.965632	snx9a
ENSDARG00000000853	2239.36	0.0261207	0.103774	0.251707	0.801268	0.924901	dstyk
ENSDARG00000000857	3041.66	0.0585421	0.0829678	0.7056	0.480437	0.757296	mapk14a
ENSDARG00000000861	9891.67	-0.0138748	0.137361	-0.10101	0.919543	0.970697	scrib
ENSDARG00000000887	2709.3	0.0484055	0.153033	0.316308	0.751769	0.906033	zgc:56699
ENSDARG00000000906	53.907	0.209336	0.429669	0.487203	0.626114	0.844785	skap2
ENSDARG00000000935	401.72	-0.287803	0.15706	-1.83244	0.0668855	0.263051	unk
ENSDARG00000000943	1362.28	-0.00235745	0.145546	-0.0161973	0.987077	0.995411	dzip1
ENSDARG00000000966	2595.05	-0.215395	0.166523	-1.29349	0.195843	0.492518	ncor2
ENSDARG00000001014	2061.54	-0.20622	0.227266	-0.907391	0.3642	0.671983	myh9b
ENSDARG00000001015	897.993	-0.330889	0.228654	-1.44712	0.147864	0.423479	znf384l
ENSDARG00000001057	2303.13	0.0187273	0.122667	0.152667	0.878661	0.957335	bysl
ENSDARG00000001127	1.88844	1.31421	1.31022	1.00304	0.315841	NA	slc17a6a
ENSDARG00000001129	4543.81	-0.172202	0.250196	-0.688268	0.491284	0.7653	dicer1
ENSDARG00000001154	3.01773	1.26389	1.36002	0.929319	0.352724	0.663479	rimbp2
ENSDARG00000001162	5962.6	0.00530081	0.13632	0.0388851	0.968982	0.988538	matr3l1.1
ENSDARG00000001169	16.0942	0.22178	0.491529	0.451204	0.651843	0.857159	hsd17b8
ENSDARG00000001210	1588.38	-0.069105	0.0983277	-0.702804	0.482178	0.758597	arl14ep
ENSDARG00000001220	4312.55	-0.0843238	0.170626	-0.494201	0.621164	0.842921	mycbp2
ENSDARG00000001234	23.3237	-0.327047	0.577753	-0.566068	0.571348	0.815045	map4k2
ENSDARG00000001241	6412.5	0.00172961	0.0792586	0.0218224	0.98259	0.993779	puf60b
ENSDARG00000001244	4945.13	-0.383577	0.649742	-0.590352	0.554955	0.804655	srrm1
ENSDARG00000001249	323.085	0.192389	0.177668	1.08285	0.278874	0.590784	pcgf1
ENSDARG00000001259	9.10654	-0.612837	0.652626	-0.939033	0.347714	0.659519	gas2a
ENSDARG00000001303	0.599149	-3.189	3.48071	-0.916192	0.359566	NA	psmb8a
ENSDARG00000001313	4280.4	0.165929	0.127365	1.30278	0.192649	0.488299	g2e3
ENSDARG00000001354	36.4039	0.261302	0.454808	0.574533	0.565607	0.812309	slc6a22.2
ENSDARG00000001414	2066.82	0.28872	0.110867	2.60421	0.00920865	0.0696468	mctp2a
ENSDARG00000001431	1637.63	-0.025626	0.229583	-0.11162	0.911125	0.966819	actn3b
ENSDARG00000001437	9.03287	1.16071	0.794894	1.46021	0.144232	0.417655	slc2a1a
ENSDARG00000001442	23.009	1.00642	0.451094	2.23108	0.0256761	0.143173	inppl1b
ENSDARG00000001447	665.152	-0.142361	0.142845	-0.996611	0.318953	0.632173	mier1b
ENSDARG00000001452	909.921	-0.176651	0.197205	-0.895773	0.370374	0.67746	adam8a
ENSDARG00000001463	1.6163	-2.65158	1.69703	-1.56249	0.118174	NA	tdh2
ENSDARG00000001470	32.486	-0.323917	0.460098	-0.704018	0.481422	0.757808	mhc1zea
ENSDARG00000001498	85.3676	-0.3239	0.441613	-0.733448	0.463285	0.744609	skap1
ENSDARG00000001549	2757.96	-0.045293	0.189751	-0.238697	0.811341	0.929333	sp3a
ENSDARG00000001557	940.576	-0.0047217	0.112742	-0.0418806	0.966594	0.988025	tomm34
ENSDARG00000001558	8191.24	0.31222	0.137046	2.27822	0.0227135	0.131171	kifc1
ENSDARG00000001559	24.0258	-0.477576	0.465036	-1.02696	0.304437	0.617507	csmd2
ENSDARG00000001572	0.226501	1.24035	4.08052	0.303967	0.761153	NA	prf1.3
ENSDARG00000001578	1040.12	0.273274	0.11757	2.32434	0.0201071	0.120236	echs1
ENSDARG00000001621	103.261	-0.211367	0.220471	-0.958708	0.337706	0.649845	nfyal
ENSDARG00000001634	355.224	-0.100592	0.322912	-0.311515	0.755409	0.907292	kirrel1a
ENSDARG00000001676	205.687	0.196626	0.238065	0.825934	0.408842	0.704974	gpm6bb
ENSDARG00000001686	5.52903	-0.536058	0.741615	-0.722825	0.469787	0.749851	uckl1a
ENSDARG00000001710	448.504	-0.0241635	0.133966	-0.18037	0.856862	0.949133	flot1a
ENSDARG00000001712	0.980473	-0.604246	2.27299	-0.265837	0.790365	NA	si:ch211-247n2.1
ENSDARG00000001721	204.964	-0.176556	0.322396	-0.547638	0.583941	0.82212	oc90
ENSDARG00000001729	3014.11	0.107087	0.116339	0.920473	0.357325	0.667169	strn3
ENSDARG00000001733	54.8809	-0.869617	0.330621	-2.63025	0.00853212	0.0658217	gulp1a
ENSDARG00000001734	499.878	-0.0840601	0.113396	-0.741298	0.458513	0.742022	fkbp8
ENSDARG00000001754	4913.72	0.165386	0.121653	1.3595	0.173989	0.463869	noc2l
ENSDARG00000001760	16.8992	-0.690252	0.513774	-1.34349	0.179112	0.469743	tnxba
ENSDARG00000001767	251.413	-0.598018	0.326265	-1.83292	0.0668138	0.262877	slc29a2
ENSDARG00000001769	1798.39	-0.135724	0.157293	-0.862875	0.388206	0.690418	ptpra
ENSDARG00000001771	0.116771	0	4.08052	0	1	NA	otol1a
ENSDARG00000001776	302.387	-0.355417	0.160136	-2.21948	0.0264543	0.145917	stim2b
ENSDARG00000001777	4299.18	0.0511409	0.130478	0.39195	0.695095	0.879064	nup155
ENSDARG00000001781	27.532	0.124525	0.538871	0.231086	0.817248	0.931648	tspan11
ENSDARG00000001782	480.208	0.22181	0.133236	1.66479	0.0959548	0.329498	prkacba
ENSDARG00000001785	7.03822	0.0909012	0.684162	0.132865	0.8943	0.963186	irx2a
ENSDARG00000001788	645.544	-0.0789145	0.190993	-0.41318	0.679475	0.870619	atp5po
ENSDARG00000001803	10.559	-1.12233	0.697926	-1.60809	0.107816	0.352933	kcnh6a
ENSDARG00000001804	16.2965	0.16502	0.491386	0.335826	0.737002	0.89908	zgc:112148
ENSDARG00000001807	98.1715	-0.375964	0.256506	-1.46571	0.142726	0.414705	tnfrsf21
ENSDARG00000001817	15.4427	-0.352283	0.570047	-0.617989	0.536582	0.793816	zmp:0000000521
ENSDARG00000001818	33.9595	-5.30774	1.22837	-4.32097	1.55348e-05	0.000428285	c3b.2
ENSDARG00000001825	67.8199	0.77205	0.295789	2.61014	0.00905054	0.0687053	cfap43
ENSDARG00000001829	3717.32	0.0209178	0.0907316	0.230546	0.817668	0.931788	zgc:112982
ENSDARG00000001835	86.3807	0.327435	0.342611	0.955704	0.339222	0.651304	nalcn
ENSDARG00000001857	2608.77	-0.0812936	0.19971	-0.407058	0.683965	0.872778	aff4
ENSDARG00000001859	15.6896	-0.320444	0.664716	-0.482077	0.629751	0.846733	dbx1b
ENSDARG00000001870	20.2374	2.09345	0.511139	4.09565	4.20977e-05	0.000989347	atp1a1a.4
ENSDARG00000001873	1545.63	0.536927	0.173675	3.09157	0.00199102	0.0220005	phgdh
ENSDARG00000001879	3507.49	0.0962781	0.14701	0.654908	0.512527	0.778327	nav2b
ENSDARG00000001880	127.882	-0.564527	0.280929	-2.0095	0.0444837	0.204892	stx3a
ENSDARG00000001881	1.08906	-3.73285	2.09817	-1.7791	0.0752232	NA	cacnb3a
ENSDARG00000001882	0.211135	0.278557	4.08052	0.0682649	0.945575	NA	kbtbd12
ENSDARG00000001888	5054.81	0.0446436	0.160479	0.27819	0.780867	0.91863	ppm1ba
ENSDARG00000001889	375.151	-0.481432	0.325548	-1.47884	0.139184	0.408775	tuba1a
ENSDARG00000001890	2743.95	-0.16169	0.152368	-1.06118	0.288608	0.600493	stt3b
ENSDARG00000001891	2.77751	0.242749	1.10422	0.219838	0.825998	NA	syt14b
ENSDARG00000001897	1181.51	0.171065	0.128004	1.3364	0.181418	0.47315	man2b1
ENSDARG00000001898	206.549	0.514538	0.18419	2.79352	0.00521378	0.0465376	manea
ENSDARG00000001906	1.03611	2.49146	1.93424	1.28808	0.197717	NA	si:dkey-247m21.3
ENSDARG00000001909	0.581735	1.24035	3.15602	0.39301	0.694312	NA	vill
ENSDARG00000001910	110.314	-0.162966	0.246176	-0.661987	0.50798	0.77545	rorab
ENSDARG00000001912	6.25673	1.14226	0.816321	1.39928	0.161729	0.445748	drd4-rs
ENSDARG00000001913	1.4344	-0.660882	1.88215	-0.35113	0.725491	NA	palmda
ENSDARG00000001929	239.739	0.221335	0.152841	1.44814	0.147578	0.423336	pink1
ENSDARG00000001930	856.24	-0.130965	0.0996304	-1.3145	0.188677	0.483188	klhl15
ENSDARG00000001933	1.36578	-1.39783	1.87777	-0.744411	0.456628	NA	prkag2b
ENSDARG00000001937	0.218176	-0.683232	4.08052	-0.167437	0.867026	NA	LO018422.1
ENSDARG00000001939	658.889	-0.0677192	0.128181	-0.528308	0.597285	0.82969	b3gat3
ENSDARG00000001940	2658.67	0.274518	0.0830814	3.30421	0.000952456	0.0123352	dnajc1
ENSDARG00000001950	2.85394	-0.388575	1.24262	-0.312707	0.754503	NA	ak1
ENSDARG00000001953	88.911	-0.252551	0.250189	-1.00944	0.312762	0.625946	pfkfb3
ENSDARG00000001968	326.486	0.17198	0.213708	0.80474	0.42097	0.712436	dock5
ENSDARG00000001969	2559.13	-0.000389429	0.11952	-0.00325828	0.9974	0.999087	txlng
ENSDARG00000001971	0.67005	0.350082	2.3836	0.146871	0.883234	NA	cthrc1b
ENSDARG00000001975	26.3829	0.185669	0.372519	0.498416	0.618191	0.841265	hsd11b2
ENSDARG00000001976	47.8033	1.38554	0.610862	2.26816	0.0233192	0.133547	fkbp16
ENSDARG00000001993	187.781	0.152165	0.176275	0.863223	0.388015	0.69031	myhb
ENSDARG00000001994	3.84075	-0.9658	1.08304	-0.891752	0.372526	0.678593	stxbp1a
ENSDARG00000001999	2371.52	0.0264797	0.213001	0.124317	0.901064	0.964454	adamts18
ENSDARG00000002002	30.2842	0.488108	0.334695	1.45837	0.144739	0.418235	lmcd1
ENSDARG00000002006	880.214	0.202627	0.119349	1.69777	0.0895521	0.314862	rxrbb
ENSDARG00000002013	815.8	-0.032241	0.120314	-0.267974	0.78872	0.920942	grb10a
ENSDARG00000002016	1691.48	0.138504	0.107064	1.29365	0.195787	0.492518	ppil2
ENSDARG00000002020	1793.93	0.0210532	0.119606	0.176022	0.860277	0.949888	rictorb
ENSDARG00000002021	639.459	0.389679	0.150414	2.5907	0.00957802	0.0713465	pygb
ENSDARG00000002026	3.66237	-0.962203	1.28211	-0.750482	0.452964	0.737791	qkib
ENSDARG00000002031	1636.75	-0.0918094	0.153491	-0.598143	0.549745	0.801274	tox4a
ENSDARG00000002037	14.4901	-2.15268	0.616307	-3.49286	0.000477873	0.00721716	pfkfb2b
ENSDARG00000002060	142.702	-0.14227	0.283154	-0.502448	0.615352	0.839834	brf2
ENSDARG00000002071	104.468	1.35907	0.269744	5.03839	4.69473e-07	1.94564e-05	adss
ENSDARG00000002077	132.392	0.313275	0.214767	1.45868	0.144654	0.418122	mnat1
ENSDARG00000002082	9752.81	0.0283341	0.144905	0.195536	0.844973	0.944051	csnk2a1
ENSDARG00000002084	25.1503	-0.565325	0.390646	-1.44715	0.147854	0.423479	lamb2
ENSDARG00000002127	869.57	0.149949	0.0963495	1.55631	0.119635	0.375977	stam
ENSDARG00000002128	2169.09	0.127806	0.0854002	1.49655	0.134509	0.400829	cwf19l1
ENSDARG00000002131	13.7294	0.192161	0.627928	0.306024	0.759586	0.909587	celf2
ENSDARG00000002165	233.965	0.375967	0.284583	1.32112	0.186463	0.480006	psme1
ENSDARG00000002167	179.849	-0.510265	0.164675	-3.09861	0.00194428	0.0216329	cacnb1
ENSDARG00000002168	1869.06	0.0697167	0.113749	0.612897	0.539944	0.796496	tra2b
ENSDARG00000002172	3170.31	0.138364	0.120641	1.14691	0.251418	0.562793	aplnra
ENSDARG00000002174	92.228	-0.291756	0.290663	-1.00376	0.315495	0.628705	itfg2
ENSDARG00000002184	762.504	0.141389	0.103552	1.36539	0.17213	0.461351	igbp1
ENSDARG00000002190	1018.57	0.258464	0.144463	1.78914	0.0735925	0.280138	chmp2bb
ENSDARG00000002192	0.738326	-1.1553	2.31756	-0.498497	0.618133	NA	aspn
ENSDARG00000002193	0.839513	3.1507	2.19049	1.43835	0.150333	NA	NA
ENSDARG00000002194	8.52499	1.33173	0.697901	1.9082	0.0563653	0.23693	rhd
ENSDARG00000002196	374.238	-0.408131	0.163942	-2.48948	0.0127929	0.0873295	bach1b
ENSDARG00000002197	308.697	-0.160472	0.201087	-0.798024	0.424857	0.71562	pygl
ENSDARG00000002204	1.02064	-3.57829	2.32735	-1.53749	0.124172	NA	hspb11
ENSDARG00000002210	59.1064	-0.908573	0.321006	-2.83039	0.00464913	0.0427344	stk25a
ENSDARG00000002213	279.999	-0.00834101	0.16993	-0.0490849	0.960852	0.985516	invs
ENSDARG00000002215	6646.67	0.131064	0.0951589	1.37732	0.168415	0.455454	rtca
ENSDARG00000002216	1422.5	-0.453201	0.171628	-2.64061	0.00827569	0.0642957	tbx3a
ENSDARG00000002217	1433.36	-0.378634	0.170217	-2.22442	0.0261201	0.144635	scocb
ENSDARG00000002219	0.101405	-0.683232	4.08052	-0.167437	0.867026	NA	si:dkey-103j14.5
ENSDARG00000002220	1078.52	0.143213	0.103879	1.37865	0.168003	0.454844	zgc:103692
ENSDARG00000002230	112.681	-0.393783	0.323453	-1.21743	0.223439	0.5295	sypb
ENSDARG00000002231	17.4617	-0.4192	0.45588	-0.91954	0.357813	0.667514	plpp2a
ENSDARG00000002235	18.358	-1.38919	0.523957	-2.65134	0.00801738	0.0631139	mmp14a
ENSDARG00000002240	2535.8	-0.0146059	0.124581	-0.11724	0.90667	0.966021	psmb6
ENSDARG00000002241	96.0403	0.0422574	0.351228	0.120313	0.904235	0.965188	kcna2a
ENSDARG00000002249	12.9843	1.33662	0.560492	2.38472	0.017092	0.107325	tbxas1
ENSDARG00000002255	87.3073	1.50692	0.253972	5.93342	2.96695e-09	2.02036e-07	epb41l3a
ENSDARG00000002259	0.932912	-1.08295	2.49214	-0.434547	0.663891	NA	NA
ENSDARG00000002267	2546.61	0.0640268	0.11326	0.565307	0.571865	0.81536	dcaf13
ENSDARG00000002271	1141.4	0.272485	0.12368	2.20315	0.0275839	0.14984	zfand5b
ENSDARG00000002285	766.853	1.23611	0.138588	8.9193	4.69251e-19	1.50716e-16	mcoln1a
ENSDARG00000002293	292.329	-0.923166	0.542577	-1.70145	0.0888591	0.313585	si:ch211-197g15.6
ENSDARG00000002295	1.39665	-1.32476	1.6877	-0.784949	0.432483	NA	NA
ENSDARG00000002298	44.9544	0.556142	0.340792	1.63191	0.102698	0.343057	ankrd22
ENSDARG00000002299	38.1935	-0.729565	0.350588	-2.08097	0.0374365	0.183806	arsh
ENSDARG00000002300	6.4622	0.0122122	1.25044	0.00976633	0.992208	0.99771	p2rx2
ENSDARG00000002304	229.006	-0.198787	0.26646	-0.746031	0.455649	0.740122	gins2
ENSDARG00000002305	413.771	0.211834	0.256716	0.82517	0.409275	0.705067	me3
ENSDARG00000002311	0.422774	-1.56387	2.92156	-0.535288	0.592451	NA	fabp11b
ENSDARG00000002330	1.9501	-0.716483	1.40416	-0.510259	0.60987	NA	lhx8a
ENSDARG00000002332	830.116	-0.204097	0.0996387	-2.04837	0.0405235	0.193156	frmd6
ENSDARG00000002333	162.672	0.0923932	0.171997	0.537179	0.591144	0.826441	fam102bb
ENSDARG00000002336	6094.39	-0.150916	0.0873388	-1.72793	0.0840005	0.303299	dlc
ENSDARG00000002339	424.469	0.138291	0.151448	0.913125	0.361177	0.670213	sgf29
ENSDARG00000002344	2171.92	0.242357	0.123387	1.96419	0.0495075	0.218821	tubb4b
ENSDARG00000002347	5655.29	0.233864	0.107009	2.18545	0.0288557	0.154877	cyp11a1
ENSDARG00000002353	128.085	0.65271	0.306581	2.12899	0.0332548	0.170349	tagapa
ENSDARG00000002355	70.4239	0.602895	0.316336	1.90587	0.0566673	0.237449	shpk
ENSDARG00000002362	1100.63	-0.053846	0.13811	-0.389877	0.696627	0.879674	ubald1a
ENSDARG00000002365	707.72	0.0554619	0.131596	0.421458	0.673421	0.867636	cers5
ENSDARG00000002369	9.91682	1.21857	0.700824	1.73877	0.0820751	0.299049	UBB
ENSDARG00000002377	357.774	0.245193	0.168385	1.45615	0.145352	0.419386	mief2
ENSDARG00000002385	587.61	-0.402592	0.226935	-1.77404	0.0760561	0.286127	atm
ENSDARG00000002391	0.965336	-0.724442	1.83196	-0.395446	0.692514	NA	tlcd1
ENSDARG00000002396	713.24	0.374505	0.16546	2.26343	0.0236095	0.134768	cry-dash
ENSDARG00000002401	555.722	1.25111	0.165894	7.54165	4.64068e-14	7.39096e-12	gale
ENSDARG00000002402	1132.03	0.313544	0.106537	2.94304	0.00325008	0.0324352	ercc3
ENSDARG00000002403	5185.21	-0.0473988	0.129919	-0.364834	0.715235	0.888328	nusap1
ENSDARG00000002405	27.0313	1.07719	0.483543	2.2277	0.0259002	0.143964	si:ch211-225b11.1
ENSDARG00000002406	13.8953	-0.00790809	0.513108	-0.0154121	0.987703	0.995676	zmynd10
ENSDARG00000002411	86.2667	-0.647092	0.317837	-2.03592	0.0417582	0.196802	pde4cb
ENSDARG00000002445	5226.74	0.0806556	0.196542	0.410374	0.681532	0.871076	prdm1a
ENSDARG00000002463	740.056	0.114509	0.105916	1.08113	0.279641	0.591348	arhgef37
ENSDARG00000002467	598.947	-0.0142611	0.148258	-0.0961911	0.923369	0.97221	rdh14b
ENSDARG00000002479	2387.11	-0.0089601	0.125406	-0.0714485	0.943041	0.979775	ercc6l
ENSDARG00000002483	8.41601	-0.77438	0.733085	-1.05633	0.290817	0.602454	wnt7ab
ENSDARG00000002487	3337.76	0.295373	0.0931344	3.17147	0.0015167	0.0178004	noc3l
ENSDARG00000002494	9.50879	-0.356656	0.691834	-0.515523	0.606188	0.834521	itgb6
ENSDARG00000002506	762.992	-0.0223183	0.143163	-0.155895	0.876116	0.956617	zgc:92818
ENSDARG00000002507	183.631	-0.445551	0.194772	-2.28755	0.0221639	0.129118	itga10
ENSDARG00000002508	0.116771	0	4.08052	0	1	NA	ankrd33ab
ENSDARG00000002509	45.7795	-0.0298221	0.436175	-0.0683718	0.94549	0.980599	zgc:153911
ENSDARG00000002510	12.0382	0.271119	1.03662	0.261543	0.793674	0.922781	dmbx1b
ENSDARG00000002523	1636.13	-0.0603784	0.111964	-0.539264	0.589704	0.825377	hsdl2
ENSDARG00000002533	35.9514	-0.601422	0.487899	-1.23268	0.217696	0.5229	adora2b
ENSDARG00000002536	4876.42	0.11443	0.0876375	1.30572	0.191648	0.48723	tm9sf4
ENSDARG00000002538	4876.61	-0.0867591	0.125046	-0.693816	0.487798	0.762768	smu1a
ENSDARG00000002546	37.7981	0.0210898	0.328794	0.0641427	0.948857	0.981641	rundc3ab
ENSDARG00000002549	111.517	0.665235	0.230514	2.88588	0.00390322	0.0372925	eif3eb
ENSDARG00000002552	6539.98	0.194673	0.085644	2.27305	0.023023	0.132559	mapkapk2a
ENSDARG00000002564	2.61857	0.827085	1.39604	0.592452	0.553548	NA	syngr1a
ENSDARG00000002571	976.934	0.00505602	0.107635	0.0469736	0.962534	0.986188	tmod2
ENSDARG00000002576	6.41025	-1.08704	0.815872	-1.33236	0.182741	0.474865	cabp5a
ENSDARG00000002582	41.0616	-0.102485	0.336815	-0.304276	0.760917	0.910276	tbx15
ENSDARG00000002587	89.2188	-0.137252	0.31432	-0.436665	0.662354	0.862721	dpysl3
ENSDARG00000002589	2.05625	0.97727	1.339	0.729852	0.46548	NA	mylpfb
ENSDARG00000002591	4590.83	0.0760894	0.11018	0.690591	0.489822	0.764197	ruvbl1
ENSDARG00000002593	2.15191	-0.724751	1.53945	-0.470787	0.637793	NA	slc45a2
ENSDARG00000002597	179.241	0.434658	0.176111	2.46809	0.0135836	0.0910507	pabpc1l
ENSDARG00000002600	2.10459	-0.58988	1.36988	-0.430606	0.666755	NA	pcsk1
ENSDARG00000002601	791.205	0.461252	0.16627	2.77412	0.00553516	0.0485517	irx7
ENSDARG00000002607	8.76567	0.541649	0.625356	0.866145	0.38641	0.689046	unm_sa1614
ENSDARG00000002609	858.787	-0.663677	0.0990384	-6.70121	2.06699e-11	2.06389e-09	rnf145a
ENSDARG00000002613	797.634	-0.130395	0.21386	-0.609718	0.542049	0.797634	rpa3
ENSDARG00000002632	1094.68	0.101184	0.142649	0.709321	0.478126	0.755428	anxa11b
ENSDARG00000002634	136.701	-0.0176187	0.185064	-0.0952031	0.924153	0.972215	b4galt1
ENSDARG00000002635	0.840561	2.22414	2.25362	0.98692	0.323682	NA	zgc:85722
ENSDARG00000002642	637.928	-0.00875052	0.119009	-0.073528	0.941386	0.97919	sh3gl1b
ENSDARG00000002644	101.625	0.126428	0.4575	0.276346	0.782283	0.919278	rgs5a
ENSDARG00000002656	23.1745	0.186321	0.409696	0.454777	0.64927	0.856456	stxbp5a
ENSDARG00000002659	11461	0.0459486	0.0756268	0.60757	0.543473	0.798588	mapre1b
ENSDARG00000002663	150.886	-0.157253	0.266836	-0.589325	0.555644	0.805026	optn
ENSDARG00000002670	466.221	0.00814601	0.119768	0.0680147	0.945774	0.980599	ATG14
ENSDARG00000002682	361.744	-0.0981389	0.213464	-0.459745	0.645699	0.855584	tbcela
ENSDARG00000002685	61.2028	0.632908	0.322696	1.96131	0.0498424	0.219646	fam113
ENSDARG00000002690	87.9075	0.112471	0.220559	0.509936	0.610096	0.836593	rabif
ENSDARG00000002696	2.17481	-0.881205	1.20251	-0.732807	0.463676	NA	gnb3b
ENSDARG00000002701	6.19819	-2.52479	0.870376	-2.9008	0.00372211	0.0360446	rasl12
ENSDARG00000002707	477.54	0.277675	0.171379	1.62024	0.105181	0.347562	her11
ENSDARG00000002710	126374	0.20507	0.0937418	2.1876	0.0286984	0.154353	ncl
ENSDARG00000002720	3820.44	0.0778447	0.0944236	0.82442	0.409701	0.705176	utp15
ENSDARG00000002722	0.741847	-2.15001	2.52525	-0.851407	0.394543	NA	NA
ENSDARG00000002731	973.659	-0.246201	0.143861	-1.71138	0.0870111	0.3096	sdc2
ENSDARG00000002732	22.1686	1.33883	0.444991	3.00867	0.00262393	0.0274732	spon2b
ENSDARG00000002745	2440.67	0.422575	0.0780419	5.41471	6.13869e-08	3.12704e-06	tdh
ENSDARG00000002748	228.203	-0.535631	0.173496	-3.08729	0.0020199	0.0222304	sema6d
ENSDARG00000002750	769.986	0.0701075	0.106654	0.657334	0.510966	0.77742	phf20a
ENSDARG00000002754	129.513	0.000991918	0.237636	0.00417411	0.99667	0.998843	pdcd2l
ENSDARG00000002758	596.596	0.0551606	0.176932	0.311761	0.755222	0.907292	dedd1
ENSDARG00000002760	2.14997	0.270707	1.47393	0.183664	0.854277	NA	gdf5
ENSDARG00000002764	0.331706	-0.683233	3.63809	-0.1878	0.851034	NA	miox
ENSDARG00000002771	6.20001	-0.164964	0.963158	-0.171274	0.864008	0.950914	si:ch211-48m9.1
ENSDARG00000002779	15.303	0.150592	0.549365	0.27412	0.783992	0.919528	pdx1
ENSDARG00000002787	1515.37	-0.103268	0.27176	-0.379995	0.703949	0.883698	tle3a
ENSDARG00000002790	1959.54	-0.0246167	0.12616	-0.195123	0.845297	0.944112	ap2m1a
ENSDARG00000002791	18385.6	0.229166	0.0817114	2.80457	0.00503833	0.0453708	atp1a1a.1
ENSDARG00000002792	4147.45	0.417416	0.121932	3.42333	0.000618579	0.00891505	arcn1a
ENSDARG00000002795	1115.04	-0.523622	0.291535	-1.79609	0.0724805	0.277027	meis3
ENSDARG00000002797	1.2789	2.21109	2.13509	1.0356	0.300391	NA	NA
ENSDARG00000002798	309.578	-0.118151	0.13744	-0.859654	0.38998	0.691378	cog8
ENSDARG00000002816	86.9884	-1.97863	0.525025	-3.76865	0.000164135	0.0030799	rasgrf2b
ENSDARG00000002826	631.843	0.0113371	0.109871	0.103186	0.917816	0.96958	cep57l1
ENSDARG00000002830	124.738	0.0300636	0.201456	0.149232	0.881371	0.957816	trmt2a
ENSDARG00000002831	19.8426	-0.104976	0.466911	-0.22483	0.822112	0.933225	col4a4
ENSDARG00000002840	197.674	-0.490212	0.216063	-2.26884	0.0232778	0.133516	si:dkey-28b4.8
ENSDARG00000002847	5.62312	-2.52429	0.934566	-2.70103	0.00691245	0.0569577	fndc1
ENSDARG00000002872	303.383	-0.0539637	0.150207	-0.359263	0.719398	0.890071	zgc:113210
ENSDARG00000002877	590.123	-0.162705	0.256923	-0.633284	0.526548	0.787836	reps1
ENSDARG00000002880	128.61	0.0951027	0.230376	0.412816	0.679742	0.870675	vps50
ENSDARG00000002894	561.442	0.164977	0.110056	1.49903	0.133866	0.399835	aven
ENSDARG00000002897	82.1097	-0.183197	0.308954	-0.59296	0.553208	0.80332	si:ch211-160o17.2
ENSDARG00000002909	2456.73	0.248342	0.182586	1.36014	0.173785	0.463869	tjp3
ENSDARG00000002912	874.027	0.199128	0.108095	1.84216	0.0654523	0.259636	adipor1a
ENSDARG00000002916	1627.43	-0.106481	0.233293	-0.456424	0.648085	0.85619	sec31b
ENSDARG00000002917	1.09965	1.66376	2.34227	0.71032	0.477506	NA	NA
ENSDARG00000002933	6.8746	0.345726	0.705816	0.489824	0.624258	0.843899	gbx2
ENSDARG00000002937	36.7045	-0.877409	0.429823	-2.04133	0.0412184	0.195453	meis1a
ENSDARG00000002945	23.2526	0.145371	0.460712	0.315536	0.752354	0.906107	bgnb
ENSDARG00000002947	337.72	-0.332738	0.184239	-1.80601	0.0709169	0.273273	abcd3b
ENSDARG00000002949	1714.46	0.0863669	0.0861519	1.0025	0.316104	0.629367	ppp6c
ENSDARG00000002952	5799.7	-0.0838043	0.0766579	-1.09322	0.274296	0.585701	smo
ENSDARG00000002956	7.94062	1.7941	0.743451	2.41321	0.0158127	0.101813	si:dkey-32n7.4
ENSDARG00000002959	0.572186	-0.683235	2.7362	-0.249702	0.802818	NA	gpr34b
ENSDARG00000002967	367.184	0.48841	0.161647	3.02147	0.00251554	0.0265337	pdap1b
ENSDARG00000002968	5613.08	-0.153411	0.165582	-0.926497	0.354188	0.664356	a1cf
ENSDARG00000002970	6401.17	0.130135	0.101165	1.28636	0.198316	0.495945	ss18
ENSDARG00000002971	509.848	-0.167963	0.364675	-0.460584	0.645097	0.855468	phc1
ENSDARG00000002986	2.60896	-1.73016	1.4378	-1.20334	0.228846	NA	gda
ENSDARG00000002988	0.125029	1.24035	4.08052	0.303967	0.761153	NA	NA
ENSDARG00000002991	1336.6	-0.175432	0.0876579	-2.00133	0.0453568	0.207618	cep135
ENSDARG00000002994	387.42	-0.338999	0.142125	-2.38522	0.0170687	0.107214	itpkca
ENSDARG00000003008	369.165	-0.440071	0.162721	-2.70445	0.00684172	0.0566109	prkcea
ENSDARG00000003017	361.348	-0.0143948	0.168748	-0.0853037	0.93202	0.975336	ube2al
ENSDARG00000003020	1.42826	-0.966188	1.72493	-0.56013	0.575391	NA	lrrc4.2
ENSDARG00000003021	668.894	0.230115	0.142784	1.61163	0.107042	0.351177	hdac8
ENSDARG00000003022	141.838	-0.22225	0.343398	-0.647207	0.517498	0.781305	limk1b
ENSDARG00000003027	233.403	-0.341403	0.177386	-1.92463	0.0542755	0.231762	scnm1
ENSDARG00000003032	1387.86	0.0391541	0.169346	0.231208	0.817153	0.931648	eif4a1b
ENSDARG00000003035	8839.71	0.179484	0.0985979	1.82036	0.0687041	0.267312	hspa9
ENSDARG00000003041	204.217	-0.701572	0.187682	-3.7381	0.000185418	0.00339377	CABZ01111496.1
ENSDARG00000003046	231.573	0.3873	0.184084	2.10393	0.0353846	0.177347	sorbs2a
ENSDARG00000003054	1.43585	-1.98035	2.37965	-0.832201	0.405295	NA	tacr3l
ENSDARG00000003058	1209.72	0.117543	0.0945248	1.24351	0.21368	0.51777	fgfr1op
ENSDARG00000003061	328.482	-0.226538	0.249701	-0.907237	0.364282	0.671983	cd276
ENSDARG00000003068	1286.43	0.101198	0.098648	1.02585	0.304962	0.618102	gorasp1a
ENSDARG00000003069	1191.21	0.185664	0.117658	1.578	0.114565	0.366558	btbd7
ENSDARG00000003077	7.5626	2.0491	0.741142	2.76479	0.00569597	0.0495909	si:ch73-111m19.2
ENSDARG00000003081	25.7168	-1.19764	0.381952	-3.13557	0.0017152	0.0195583	NA
ENSDARG00000003084	28.6167	-0.00120987	0.440036	-0.00274948	0.997806	0.999258	spire2
ENSDARG00000003085	529.676	0.0747906	0.12696	0.589088	0.555803	0.805026	stambpl1
ENSDARG00000003087	349.661	0.0732461	0.136478	0.536688	0.591483	0.826456	ubxn6
ENSDARG00000003091	1571.25	0.0821889	0.150757	0.545175	0.585633	0.823176	oclnb
ENSDARG00000003098	7991.27	-0.171412	0.0955381	-1.79418	0.0727852	0.277861	kdm5bb
ENSDARG00000003109	198.08	0.0118964	0.179279	0.0663568	0.947094	0.981007	rcan1a
ENSDARG00000003113	17.3422	-0.841723	0.574418	-1.46535	0.142826	0.414705	ada
ENSDARG00000003127	3015.93	-0.144292	0.0786685	-1.83418	0.0666273	0.262572	zgc:123105
ENSDARG00000003132	857.807	-0.324485	0.14182	-2.28801	0.0221368	0.129077	apip
ENSDARG00000003142	22.4822	-1.18619	0.425395	-2.78845	0.00529614	0.0470982	dachc
ENSDARG00000003144	172.16	0.34627	0.200021	1.73117	0.0834217	0.302106	pxmp2
ENSDARG00000003146	0.688882	1.24035	2.63181	0.471292	0.637432	NA	si:dkey-27m7.4
ENSDARG00000003151	4860.8	-0.088068	0.108564	-0.81121	0.417245	0.709772	skp1
ENSDARG00000003153	3234.27	0.0161859	0.12566	0.128807	0.89751	0.96389	nudt21
ENSDARG00000003157	338.929	-0.00341193	0.133329	-0.0255903	0.979584	0.992772	nfkbil1
ENSDARG00000003165	585.847	-0.440028	0.280628	-1.56802	0.116877	0.370535	nr2f6b
ENSDARG00000003167	553.735	-0.0316748	0.133894	-0.236566	0.812994	0.929692	mlst8
ENSDARG00000003169	8619.88	-0.129521	0.16557	-0.782271	0.434055	0.723053	magi1b
ENSDARG00000003175	322.685	-0.0118908	0.1667	-0.0713307	0.943135	0.979775	stx5al
ENSDARG00000003181	0.105988	-0.683232	4.08052	-0.167437	0.867026	NA	sult1st4
ENSDARG00000003189	8899.71	0.134558	0.10038	1.34048	0.18009	0.470933	psmd1
ENSDARG00000003193	488.403	0.401241	0.182964	2.193	0.0283074	0.152913	rassf7b
ENSDARG00000003197	57.7146	-1.75317	0.565041	-3.10274	0.00191739	0.0214203	wdr21
ENSDARG00000003200	1715.29	0.0249699	0.167756	0.148847	0.881675	0.957873	foxm1
ENSDARG00000003203	17.2714	-2.86697	0.856035	-3.34913	0.000810669	0.0109031	NA
ENSDARG00000003205	1857.75	0.153521	0.12973	1.18339	0.236655	0.544807	ngly1
ENSDARG00000003206	28.1335	-0.0334293	0.405089	-0.0825232	0.934231	0.97631	chchd6a
ENSDARG00000003207	322.074	0.547474	0.230853	2.37153	0.0177148	0.110052	mterf3
ENSDARG00000003208	69.0141	-0.339872	0.282093	-1.20482	0.228272	0.535088	pomk
ENSDARG00000003210	4.36618	-0.126858	0.859178	-0.147651	0.882619	0.958358	NA
ENSDARG00000003213	4813.61	-0.0852794	0.0932874	-0.914158	0.360634	0.669813	naa15a
ENSDARG00000003216	100.907	-1.37698	0.454749	-3.02801	0.00246172	0.0260945	anxa2a
ENSDARG00000003217	2961.65	-0.223355	0.129687	-1.72226	0.0850223	0.305285	urb2
ENSDARG00000003219	21.1705	0.764618	0.463511	1.64962	0.0990202	0.335954	bin2a
ENSDARG00000003229	8.52477	-0.224888	0.700002	-0.321267	0.748008	0.904349	gdf9
ENSDARG00000003235	2087.11	-0.045467	0.0978746	-0.464544	0.642258	0.853819	nup88
ENSDARG00000003244	161.621	-0.396832	0.184012	-2.15655	0.0310407	0.162727	gbp3
ENSDARG00000003250	19.2811	0.721518	0.491406	1.46827	0.14203	0.413578	pik3cd
ENSDARG00000003251	187.333	-0.402924	0.190127	-2.11924	0.0340703	0.173221	zbtb22b
ENSDARG00000003257	45.9377	-0.396001	0.280044	-1.41407	0.157342	0.438105	zgc:101559
ENSDARG00000003269	1251.3	0.0598653	0.122733	0.487771	0.625712	0.844653	clcn3
ENSDARG00000003270	394.528	0.350287	0.179781	1.94841	0.0513656	0.223807	dhps
ENSDARG00000003281	831.724	0.437143	0.173781	2.51549	0.0118868	0.0831472	pik3ip1
ENSDARG00000003287	2529.2	0.157629	0.129759	1.21478	0.224451	0.530634	wdr12
ENSDARG00000003290	16.5089	0.00521511	0.736507	0.00708087	0.99435	0.998387	dab1b
ENSDARG00000003293	103.158	-0.555671	0.208124	-2.6699	0.00758732	0.0608723	sox9a
ENSDARG00000003303	0.672583	-0.697436	2.69139	-0.259136	0.79553	NA	stc1
ENSDARG00000003307	763.525	0.183358	0.0961234	1.90752	0.0564529	0.237016	stx16
ENSDARG00000003308	622.076	-0.125305	0.121806	-1.02872	0.30361	0.616717	emc2
ENSDARG00000003311	386.888	0.0215609	0.159497	0.13518	0.892469	0.962869	pank2
ENSDARG00000003313	549.945	0.49305	0.18306	2.69338	0.00707315	0.0578223	eps8l1b
ENSDARG00000003320	371.437	0.448657	0.205901	2.17899	0.0293324	0.156583	fam91a1
ENSDARG00000003326	0.557858	0.278557	3.24525	0.0858355	0.931597	NA	cacng5a
ENSDARG00000003328	357.1	0.519192	0.137685	3.77088	0.000162671	0.00306098	slf2
ENSDARG00000003344	2.811	1.09251	1.32756	0.82294	0.410542	NA	trpc2b
ENSDARG00000003373	294.881	0.307791	0.169176	1.81935	0.0688583	0.267804	commd2
ENSDARG00000003375	218.081	-0.580639	0.237436	-2.44546	0.0144669	0.0955748	gng12a
ENSDARG00000003381	9.20575	0.110252	0.643084	0.171442	0.863876	0.950914	si:ch211-266g18.6
ENSDARG00000003382	817.96	0.129698	0.130481	0.993999	0.320223	0.633771	cwc25
ENSDARG00000003383	136.416	0.0634138	0.224216	0.282824	0.777311	0.916885	asb8
ENSDARG00000003395	6.83484	0.573158	0.823421	0.69607	0.486385	0.761582	col4a3
ENSDARG00000003398	858.275	0.0285093	0.0977712	0.291592	0.770599	0.913578	rbpja
ENSDARG00000003399	1775.74	-0.0536366	0.130934	-0.409647	0.682065	0.871392	fgf8a
ENSDARG00000003403	93.0654	1.04369	0.379077	2.75324	0.00590095	0.0508061	tenm1
ENSDARG00000003411	1973.85	0.0837025	0.133031	0.629193	0.529222	0.78888	foxa2
ENSDARG00000003414	2.27167	-1.77761	1.36657	-1.30078	0.193333	NA	capslb
ENSDARG00000003420	16.9345	-0.36319	0.507464	-0.715695	0.47418	0.752897	chrna5
ENSDARG00000003421	71.5915	-0.648311	0.309068	-2.09763	0.0359376	0.179329	igf2bp2a
ENSDARG00000003429	6784.25	-0.127379	0.105224	-1.21055	0.226068	0.532391	hnrnpdl
ENSDARG00000003444	76.7065	-0.346428	0.300651	-1.15226	0.249214	0.56007	dhrs7
ENSDARG00000003446	831.934	0.225813	0.120388	1.87571	0.0606954	0.248178	ippk
ENSDARG00000003449	392.81	1.20879	0.369333	3.2729	0.00106451	0.0135496	pde10a
ENSDARG00000003462	183.149	0.626367	0.161191	3.88588	0.000101961	0.00206614	fech
ENSDARG00000003469	3.47085	-0.33534	1.0117	-0.331461	0.740296	0.900591	neurod4
ENSDARG00000003475	0.241801	1.24035	4.08052	0.303967	0.761153	NA	sult1st5
ENSDARG00000003486	7724.01	0.107604	0.0845769	1.27227	0.203278	0.50326	ppp1caa
ENSDARG00000003487	4831.76	-0.0817295	0.124633	-0.65576	0.511979	0.778043	nup93
ENSDARG00000003495	217.091	-0.392399	0.209476	-1.87324	0.0610349	0.248932	madd
ENSDARG00000003512	74.2061	-0.123325	0.325705	-0.37864	0.704956	0.884165	anks1b
ENSDARG00000003517	305.35	-0.0621354	0.200715	-0.309571	0.756887	0.908105	impa1
ENSDARG00000003519	283.043	0.546049	0.237913	2.29516	0.0217238	0.127177	aprt
ENSDARG00000003520	113.784	-0.435572	0.25306	-1.72122	0.0852102	0.305625	tbc1d14
ENSDARG00000003523	2.20243	-1.77818	1.37874	-1.28972	0.197148	NA	itln3
ENSDARG00000003526	5584.84	0.351792	0.110135	3.19417	0.00140232	0.0168479	psma5
ENSDARG00000003527	5750.78	0.0984261	0.0901866	1.09136	0.275114	0.586539	mak16
ENSDARG00000003531	5651.55	0.148157	0.105217	1.40811	0.159097	0.440835	tcea1
ENSDARG00000003533	0.808688	0	2.7159	0	1	NA	col8a1b
ENSDARG00000003544	132.251	-0.163642	0.231372	-0.707271	0.479398	0.756323	adarb1b
ENSDARG00000003553	0.337005	-0.716348	4.02954	-0.177774	0.8589	NA	gnrhr2
ENSDARG00000003564	1456.69	0.022372	0.108085	0.206985	0.836021	0.939645	dohh
ENSDARG00000003570	3285.87	0.853528	0.191387	4.45971	8.20715e-06	0.000245209	hsp90b1
ENSDARG00000003573	194.198	0.416758	0.18351	2.27104	0.0231446	0.132999	dctn5
ENSDARG00000003576	35.9852	-2.75253	0.463359	-5.94037	2.84372e-09	1.95719e-07	klhl32
ENSDARG00000003584	195.338	0.218294	0.222737	0.98005	0.327061	0.640378	pla2g7
ENSDARG00000003592	246.502	0.358247	0.190337	1.88218	0.0598121	0.245818	surf1
ENSDARG00000003599	43119.8	-0.0226372	0.142996	-0.158306	0.874215	0.955625	rpl3
ENSDARG00000003607	2391.83	-0.0280398	0.0972847	-0.288224	0.773175	0.914617	nr2f6a
ENSDARG00000003615	1.12112	0.335403	2.08306	0.161015	0.872082	NA	slc26a3.2
ENSDARG00000003616	1323.07	0.076148	0.112053	0.679574	0.496774	0.76836	arih1
ENSDARG00000003631	991.054	0.123539	0.141498	0.87308	0.38262	0.686384	clockb
ENSDARG00000003635	229.514	0.329315	0.182451	1.80495	0.0710827	0.273803	mogat3b
ENSDARG00000003641	1854.59	0.127955	0.208958	0.612348	0.540307	0.796582	tfg
ENSDARG00000003642	253.844	-0.0675772	0.190026	-0.35562	0.722125	0.891139	zfyve19
ENSDARG00000003655	318.199	0.0868727	0.251257	0.345752	0.729529	0.895639	tmem59l
ENSDARG00000003675	204.908	1.47094	0.19758	7.44475	9.7131e-14	1.45102e-11	cryl1
ENSDARG00000003680	6.4218	-0.683013	0.692232	-0.986682	0.323798	0.637572	runx1t1
ENSDARG00000003681	10420.9	-0.175919	0.0745443	-2.35992	0.0182787	0.112552	eif5
ENSDARG00000003684	3.38756	0.0590658	1.17899	0.0500985	0.960044	0.985302	obsl1a
ENSDARG00000003693	2869.2	-0.0393641	0.0839652	-0.468814	0.639202	0.852181	hars
ENSDARG00000003695	1957.06	-0.509709	0.161151	-3.16293	0.00156189	0.0181759	vdac3
ENSDARG00000003697	4.42855	-0.991282	0.826739	-1.19903	0.230518	0.537662	slc5a8l
ENSDARG00000003699	899.395	-0.0217203	0.140925	-0.154126	0.87751	0.957317	atp7a
ENSDARG00000003701	88.7641	-0.321064	0.204104	-1.57304	0.115709	0.368328	cldng
ENSDARG00000003706	45.4541	0.802384	0.301674	2.65977	0.00781929	0.0620885	ryr2b
ENSDARG00000003732	0.78949	-3.12876	2.35909	-1.32626	0.184754	NA	mitfa
ENSDARG00000003749	1953.45	0.116262	0.106981	1.08675	0.277148	0.588855	polb
ENSDARG00000003750	10202.4	-0.00102349	0.103606	-0.00987865	0.992118	0.99771	pfas
ENSDARG00000003751	1946.48	0.0263574	0.267263	0.0986198	0.92144	0.971393	lats1
ENSDARG00000003754	151.459	-0.227645	0.238553	-0.954276	0.339944	0.652115	tspan2a
ENSDARG00000003757	390.128	-0.122288	0.186143	-0.656958	0.511208	0.777522	cnpy1
ENSDARG00000003769	50.9069	-0.382378	0.342129	-1.11764	0.263719	0.574123	tada2b
ENSDARG00000003776	390.891	0.240541	0.133759	1.79831	0.0721284	0.276229	pip4k2aa
ENSDARG00000003779	418.591	-0.114991	0.228448	-0.503357	0.614713	0.839518	ctnnd2b
ENSDARG00000003789	4011.69	0.167549	0.117137	1.43036	0.152613	0.430601	dennd5b
ENSDARG00000003795	2121.85	-0.0576856	0.120149	-0.480116	0.631145	0.847061	idh2
ENSDARG00000003797	0.459262	0	3.94744	0	1	NA	asb2a.1
ENSDARG00000003803	0.125029	1.24035	4.08052	0.303967	0.761153	NA	NA
ENSDARG00000003808	196.341	-0.293593	0.250451	-1.17226	0.241093	0.550943	aqp3a
ENSDARG00000003811	6607.26	0.381511	0.134688	2.83256	0.00461772	0.042517	plxnb2a
ENSDARG00000003818	1419.04	0.140708	0.128457	1.09537	0.273355	0.584794	prkag1
ENSDARG00000003820	16.0249	0.297173	0.533846	0.556664	0.577757	0.817889	nr1d2a
ENSDARG00000003822	91.6918	-0.0939566	0.293939	-0.319646	0.749236	0.904976	ankrd16
ENSDARG00000003827	799.211	0.0419437	0.125131	0.335197	0.737476	0.899203	snapc1b
ENSDARG00000003829	1723.99	-0.194472	0.0912897	-2.13027	0.0331491	0.169988	galnt2
ENSDARG00000003835	3581.32	0.288563	0.126136	2.28772	0.0221541	0.129099	stom
ENSDARG00000003841	81.4315	0.880534	0.30412	2.89535	0.00378739	0.0364569	usb1
ENSDARG00000003845	212.013	0.23286	0.189147	1.23111	0.218283	0.523657	chm
ENSDARG00000003846	471.843	0.399101	0.135434	2.94684	0.00321039	0.0320723	mrpl21
ENSDARG00000003854	7085.74	0.277894	0.118555	2.34401	0.0190776	0.115939	acsl1b
ENSDARG00000003860	16796.9	0.0815914	0.0935079	0.872561	0.382902	0.686675	cbx3a
ENSDARG00000003865	131.671	0.182953	0.244975	0.746821	0.455171	0.739534	pard6b
ENSDARG00000003866	7325.06	0.246612	0.0888416	2.77586	0.00550559	0.0483845	tm9sf2
ENSDARG00000003867	24.1857	0.732175	0.493734	1.48293	0.138092	0.40682	cdk20
ENSDARG00000003869	238.973	0.761433	0.19022	4.00291	6.25675e-05	0.0013875	decr1
ENSDARG00000003872	224.923	-0.408064	0.192287	-2.12216	0.0338244	0.172401	ccdc102a
ENSDARG00000003877	59.608	0.0600776	0.31145	0.192896	0.84704	0.944833	pbrm1
ENSDARG00000003899	156.385	0.267499	0.172394	1.55167	0.120742	0.377615	zdhhc23b
ENSDARG00000003900	46.2891	-0.226451	0.339935	-0.66616	0.505309	0.773558	gpr61l
ENSDARG00000003902	61.4961	1.74858	0.362674	4.82135	1.42591e-06	5.32532e-05	ctsl.1
ENSDARG00000003903	0.189004	-1.53311	4.04229	-0.379268	0.704489	NA	NA
ENSDARG00000003904	65.5384	-0.303578	0.349213	-0.869321	0.384671	0.687535	sycp1
ENSDARG00000003909	3.03459	1.36844	1.54225	0.887301	0.374917	0.68013	ftr01
ENSDARG00000003910	3093.58	-0.0797513	0.258483	-0.308536	0.757675	0.908599	med13b
ENSDARG00000003920	34180.7	0.0423167	0.0835504	0.506481	0.612519	0.838169	setb
ENSDARG00000003925	2.46001	0.530028	1.27178	0.41676	0.676854	NA	cx28.6
ENSDARG00000003927	2950.85	-0.0272057	0.103749	-0.262226	0.793148	0.922781	cldn12
ENSDARG00000003931	4550.37	0.179923	0.191621	0.938956	0.347754	0.659519	cndp2
ENSDARG00000003934	120.513	-0.0171576	0.194287	-0.0883106	0.92963	0.974333	nxnl2
ENSDARG00000003938	5897.4	-0.0239885	0.122711	-0.195488	0.845011	0.944051	rpa1
ENSDARG00000003940	995.038	-0.201626	0.102752	-1.96226	0.0497319	0.219461	mtfr1l
ENSDARG00000003941	5523.93	0.105495	0.0792247	1.3316	0.182993	0.475276	rrs1
ENSDARG00000003952	5435.06	0.115619	0.140885	0.820657	0.411841	0.706787	pfn2
ENSDARG00000003961	263.224	-0.0547075	0.282765	-0.193474	0.846588	0.944808	parp3
ENSDARG00000003963	245.145	-0.648379	0.268235	-2.4172	0.0156403	0.10092	traf4a
ENSDARG00000003965	0.568829	1.20861	3.17709	0.380412	0.703639	NA	tlx1
ENSDARG00000003968	49.5579	0.360185	0.301192	1.19587	0.231748	0.539374	larp6b
ENSDARG00000003971	83.8773	-0.343236	0.301838	-1.13715	0.255475	0.567107	isl2a
ENSDARG00000003973	125.039	-0.407038	0.288968	-1.40859	0.158956	0.440627	chordc1a
ENSDARG00000003974	1011.19	-0.236882	0.106758	-2.21887	0.0264954	0.146055	spoplb
ENSDARG00000003977	58.9095	0.492384	0.262849	1.87326	0.0610331	0.248932	zgc:153896
ENSDARG00000003984	2886.45	0.0318598	0.0854803	0.372716	0.70936	0.885734	LTN1
ENSDARG00000003989	4.00499	-0.700069	1.03152	-0.678676	0.497343	0.768773	crhr1
ENSDARG00000003991	5.17839	3.01294	1.12576	2.67636	0.00744274	0.0600408	fhl2b
ENSDARG00000003994	7.67356	-0.219622	0.810944	-0.270823	0.786527	0.9206	syt9a
ENSDARG00000003998	0.847782	-1.60211	2.218	-0.722321	0.470097	NA	phyhipla
ENSDARG00000004015	3.43747	1.47158	1.03323	1.42425	0.154373	0.433158	adcyap1a
ENSDARG00000004017	994.914	0.434063	0.150281	2.88834	0.00387276	0.0370934	spag1a
ENSDARG00000004018	48.0375	-0.369258	0.282105	-1.30894	0.190555	0.485862	CHST13
ENSDARG00000004023	55.084	-0.347689	0.380549	-0.913651	0.3609	0.670138	isl1
ENSDARG00000004034	205.035	0.132502	0.282934	0.468315	0.639559	0.852405	arhgdig
ENSDARG00000004037	1140.08	0.0613073	0.120545	0.508583	0.611045	0.837255	cog2
ENSDARG00000004046	1010.18	0.0122822	0.105905	0.115974	0.907673	0.966021	phf6
ENSDARG00000004049	2640.61	-0.166234	0.144093	-1.15365	0.248642	0.559385	marcksa
ENSDARG00000004051	3.01987	1.2612	1.29171	0.976386	0.328873	0.642375	CR354540.1
ENSDARG00000004055	598.664	0.168549	0.1635	1.03088	0.302597	0.615381	uhrf1bp1l
ENSDARG00000004059	138.027	-0.0127089	0.325199	-0.0390803	0.968826	0.988538	galk2
ENSDARG00000004060	94.1812	-0.401573	0.285055	-1.40875	0.158908	0.440558	bhlhe40
ENSDARG00000004074	317.167	0.164142	0.222905	0.736375	0.461502	0.743132	bach2b
ENSDARG00000004078	4786.47	-0.171767	0.114605	-1.49877	0.133933	0.399849	acsl4a
ENSDARG00000004094	2231.67	0.584647	0.195409	2.99192	0.00277225	0.028569	acsbg2
ENSDARG00000004105	177.726	-0.699984	0.333971	-2.09594	0.0360872	0.17969	tie1
ENSDARG00000004111	8.22844	-0.155319	0.817197	-0.190063	0.84926	0.94547	esr1
ENSDARG00000004114	960.243	0.0825875	0.126209	0.654372	0.512872	0.778478	tti1
ENSDARG00000004115	92.1402	0.118356	0.251351	0.470881	0.637725	0.851317	mgat4b
ENSDARG00000004130	73.8987	0.151969	0.259454	0.585726	0.55806	0.806477	mvk
ENSDARG00000004131	302.682	0.231676	0.236352	0.980217	0.326979	0.640322	rttn
ENSDARG00000004132	3667.29	-0.113658	0.139446	-0.815066	0.415035	0.70883	usp19
ENSDARG00000004141	10.2692	-1.15571	0.988982	-1.16859	0.242569	0.552547	zgc:92630
ENSDARG00000004150	18.8791	0.345236	0.666189	0.518226	0.604301	0.833637	grm2a
ENSDARG00000004151	225.999	-0.018929	0.162144	-0.116742	0.907065	0.966021	rab23
ENSDARG00000004154	50.9383	-0.254448	0.275718	-0.922855	0.356083	0.666031	orai1b
ENSDARG00000004158	3.63174	0.14143	1.12084	0.126183	0.899587	0.964189	tmem63c
ENSDARG00000004160	2468.66	-0.0480919	0.135465	-0.355013	0.72258	0.891421	reep3b
ENSDARG00000004161	3994.54	0.00724458	0.0939113	0.0771428	0.93851	0.978074	ik
ENSDARG00000004167	28.2167	0.204235	0.381621	0.535177	0.592527	0.826895	zgc:110366
ENSDARG00000004169	3751.94	-0.170382	0.115216	-1.4788	0.139193	0.408775	stmn1a
ENSDARG00000004171	2734.28	-0.0180808	0.167602	-0.107879	0.914091	0.968095	rabac1
ENSDARG00000004173	8349.51	0.281358	0.0837966	3.35763	0.000786134	0.0107064	copa
ENSDARG00000004174	13482.3	-0.212592	0.257602	-0.825271	0.409218	0.705067	cnot1
ENSDARG00000004176	163.454	-0.328288	0.181242	-1.81132	0.0700908	0.271196	ulk4
ENSDARG00000004177	219.405	-0.00202395	0.362976	-0.005576	0.995551	0.998843	fam169ab
ENSDARG00000004184	808.475	0.039596	0.141632	0.279569	0.779808	0.91807	nf1b
ENSDARG00000004187	5.23367	0.482341	0.805697	0.598663	0.549398	0.801274	zgc:122979
ENSDARG00000004189	4024.41	0.118544	0.0967717	1.22498	0.220583	0.526421	cbx1a
ENSDARG00000004196	259.7	-0.570061	0.177662	-3.20869	0.00133342	0.0161307	tnfsf10l
ENSDARG00000004199	0.443895	-0.683234	3.36625	-0.202966	0.839162	NA	spam1
ENSDARG00000004204	16.0427	-0.248322	0.434046	-0.572109	0.567248	0.813311	efhc2
ENSDARG00000004211	203.647	-0.00414654	0.179776	-0.0230651	0.981598	0.993779	ccdc106a
ENSDARG00000004218	289.93	-0.190425	0.223245	-0.852986	0.393667	0.693722	rnd1b
ENSDARG00000004219	5.29889	-0.853752	0.936733	-0.911415	0.362077	0.670663	slc6a3
ENSDARG00000004227	7.82786	0.690537	0.647406	1.06662	0.286143	0.59862	pde3a
ENSDARG00000004232	158.967	-0.295522	0.241178	-1.22533	0.220452	0.52637	dlb
ENSDARG00000004243	4.42203	-0.142103	0.829744	-0.171261	0.864019	0.950914	asic4b
ENSDARG00000004246	880.229	-0.307364	0.14698	-2.0912	0.0365104	0.180919	slit2
ENSDARG00000004251	715.965	-0.140511	0.172151	-0.816205	0.414383	0.708381	dhfr
ENSDARG00000004256	1333.5	0.163159	0.144533	1.12887	0.258953	0.570204	wnt11
ENSDARG00000004260	1.49706	1.72904	2.01228	0.859241	0.390208	NA	cul5b
ENSDARG00000004261	3418.1	0.0988397	0.12166	0.812423	0.416549	0.709373	tmed9
ENSDARG00000004262	9.13078	-0.0677568	0.739312	-0.0916485	0.926977	0.973249	cyp46a1.2
ENSDARG00000004270	487.803	0.205382	0.122026	1.6831	0.0923556	0.321667	atl3
ENSDARG00000004274	55.3388	-0.0158039	0.293816	-0.0537883	0.957104	0.984439	zgc:112496
ENSDARG00000004280	4082.99	0.198601	0.128712	1.54299	0.122834	0.38161	seh1l
ENSDARG00000004282	598.519	0.280058	0.164078	1.70686	0.0878483	0.311772	zgc:77375
ENSDARG00000004291	55.787	0.0567744	0.297813	0.190638	0.848809	0.945337	hecw1b
ENSDARG00000004296	36.8656	-0.994308	0.51283	-1.93886	0.052518	0.227279	ambp
ENSDARG00000004297	1695.51	-0.355659	0.113317	-3.13861	0.0016975	0.0194025	irf2bpl
ENSDARG00000004301	0.46322	1.76086	2.7565	0.638805	0.52295	NA	NA
ENSDARG00000004302	17.1421	0.565904	0.451562	1.25321	0.210128	0.512903	slc45a1
ENSDARG00000004305	0.893926	0.283655	2.2982	0.123425	0.901771	NA	vangl1
ENSDARG00000004306	134.225	0.174655	0.205279	0.850818	0.39487	0.694252	klhl18
ENSDARG00000004307	36.2552	-0.492795	0.401825	-1.22639	0.220051	0.525672	lypd6
ENSDARG00000004308	392.476	0.0773746	0.128523	0.602027	0.547156	0.799827	fam8a1b
ENSDARG00000004311	89.2857	-0.25316	0.211292	-1.19815	0.230857	0.53804	ldlrap1a
ENSDARG00000004318	68.0114	0.754089	0.288423	2.61452	0.00893524	0.0682485	cbwd
ENSDARG00000004322	16.9788	-0.189105	0.525412	-0.359918	0.718909	0.889847	ush1ga
ENSDARG00000004325	177.63	0.138759	0.212336	0.653489	0.513441	0.778827	casp9
ENSDARG00000004328	664.499	-0.0174655	0.138209	-0.12637	0.899439	0.964189	LIN28A
ENSDARG00000004336	561.947	0.576875	0.139534	4.13431	3.56022e-05	0.000866276	exoc4
ENSDARG00000004343	2051.96	0.0122558	0.0983359	0.124632	0.900815	0.964339	nelfe
ENSDARG00000004358	0.991209	1.24255	1.85027	0.671547	0.501872	NA	gnb3a
ENSDARG00000004363	206.477	-0.129655	0.158269	-0.819209	0.412667	0.706787	lhfpl6
ENSDARG00000004372	917.04	-0.491748	0.112866	-4.35691	1.31909e-05	0.000373276	fmnl3
ENSDARG00000004377	18.0636	0.115971	0.456533	0.254026	0.799476	0.924417	ppp1r13ba
ENSDARG00000004378	29.9782	-0.813283	0.378311	-2.14977	0.0315732	0.164668	yrk
ENSDARG00000004386	10.8247	-0.0979915	0.749945	-0.130665	0.89604	0.963615	si:dkey-153k10.9
ENSDARG00000004392	75.2268	0.33446	0.297149	1.12556	0.26035	0.571241	hdr
ENSDARG00000004396	403.643	-0.400001	0.175105	-2.28435	0.0223512	0.129894	b3gnt5b
ENSDARG00000004402	180.702	0.663417	0.263453	2.51816	0.0117971	0.0827302	elovl6
ENSDARG00000004405	314.248	0.579349	0.231773	2.49964	0.012432	0.0858289	snx10a
ENSDARG00000004406	234.194	0.206346	0.218023	0.946445	0.343922	0.656426	spra
ENSDARG00000004415	255.669	-0.340681	0.145972	-2.33387	0.0196025	0.118272	tcf7l2
ENSDARG00000004427	1021.35	-0.140436	0.13474	-1.04228	0.297284	0.609904	dpy30
ENSDARG00000004433	37.1408	0.305965	0.364478	0.839458	0.401212	0.698316	btk
ENSDARG00000004436	849.902	0.138081	0.122711	1.12525	0.260482	0.571255	fam92a1
ENSDARG00000004445	1.95932	-0.949887	1.42943	-0.664523	0.506356	NA	grm5a
ENSDARG00000004447	147.695	-0.47115	0.834652	-0.564486	0.572423	0.815516	aplnr2
ENSDARG00000004451	88.2065	-0.212194	0.21206	-1.00063	0.317005	0.630479	tnfrsfa
ENSDARG00000004452	9217.32	-0.0782464	0.117316	-0.66697	0.504791	0.773433	tardbpl
ENSDARG00000004455	1.75573	0.29425	1.45842	0.201759	0.840105	NA	p2rx5
ENSDARG00000004459	0.594177	1.80893	2.64747	0.683269	0.494437	NA	unc119.2
ENSDARG00000004460	493.454	0.218241	0.160504	1.35972	0.173919	0.463869	desi2
ENSDARG00000004470	721.409	0.185602	0.154357	1.20242	0.229202	0.535974	prkcsh
ENSDARG00000004472	99.2522	-0.397429	0.229459	-1.73203	0.0832689	0.301914	atat1
ENSDARG00000004473	0.247503	2.18691	4.0335	0.542187	0.58769	NA	NA
ENSDARG00000004492	233.667	0.87296	0.177822	4.90917	9.14636e-07	3.58251e-05	pcyt1ab
ENSDARG00000004497	7.19455	0.0262202	0.714532	0.0366957	0.970728	0.988893	tspan33a
ENSDARG00000004498	0.108947	0	4.08052	0	1	NA	NA
ENSDARG00000004502	237.259	-0.0549122	0.173158	-0.317123	0.75115	0.905912	rcor3
ENSDARG00000004517	3633.19	0.138695	0.122218	1.13481	0.256453	0.567928	ppat
ENSDARG00000004525	717.938	0.0402701	0.131101	0.307167	0.758716	0.908997	zgc:63882
ENSDARG00000004527	189.489	-0.421158	0.176194	-2.39031	0.016834	0.106036	pin4
ENSDARG00000004529	165.679	-0.39054	0.241053	-1.62014	0.105201	0.347562	zgc:173742
ENSDARG00000004537	4951.57	-0.00669179	0.264156	-0.0253327	0.97979	0.992772	kmt2a
ENSDARG00000004539	531.478	-0.06274	0.244495	-0.25661	0.79748	0.923661	ptgs2a
ENSDARG00000004561	2.47185	-2.75614	1.58467	-1.73925	0.0819911	NA	prkcg
ENSDARG00000004574	204.88	-0.533334	0.176813	-3.01638	0.00255812	0.0269092	gtf3c2
ENSDARG00000004576	1383.45	0.0556593	0.123622	0.450239	0.652538	0.85731	plk4
ENSDARG00000004577	0.429037	-2.22581	3.30849	-0.672757	0.501102	NA	zgc:194665
ENSDARG00000004580	0.917639	0.278558	2.56304	0.108683	0.913454	NA	NA
ENSDARG00000004581	1926.34	0.363743	0.159267	2.28386	0.02238	0.130023	sel1l
ENSDARG00000004586	10.8242	4.41986	1.13209	3.90414	9.45616e-05	0.00194275	ntrk1
ENSDARG00000004587	640.035	0.0551956	0.118885	0.464277	0.642449	0.85386	kat5a
ENSDARG00000004588	354.67	-1.39005	0.759231	-1.83087	0.0671206	0.263653	sox4a
ENSDARG00000004592	0.919288	2.18763	2.02553	1.08003	0.280128	NA	gpr22a
ENSDARG00000004594	685.887	-0.251847	0.197743	-1.27361	0.202803	0.502276	znf800a
ENSDARG00000004597	434.771	-0.747891	0.279992	-2.67112	0.00755997	0.0607034	lrrc4ba
ENSDARG00000004616	763.236	0.09097	0.0969491	0.938327	0.348076	0.65976	mtmr2
ENSDARG00000004618	43.2785	0.0609689	0.291028	0.209495	0.834062	0.939404	stx2a
ENSDARG00000004621	400.699	0.0376028	0.216225	0.173906	0.861939	0.95041	gpm6ab
ENSDARG00000004627	2.85329	-0.543612	1.03019	-0.527679	0.597722	NA	panx3
ENSDARG00000004632	461.867	-0.46157	0.164732	-2.80194	0.00507967	0.0457218	egln1b
ENSDARG00000004633	1.05349	-0.146034	1.99721	-0.073119	0.941711	NA	epn3b
ENSDARG00000004634	898.648	0.291868	0.145037	2.01237	0.0441811	0.203937	osbp
ENSDARG00000004635	463.98	-0.708997	0.223642	-3.17023	0.00152317	0.0178437	epha7
ENSDARG00000004636	2348.02	-0.0867342	0.123141	-0.704351	0.481214	0.757792	ccdc9
ENSDARG00000004643	8.40458	-2.09495	0.893653	-2.34426	0.019065	0.115924	cdhr1a
ENSDARG00000004647	470.655	0.177532	0.143043	1.24111	0.214565	0.518628	spice1
ENSDARG00000004658	14.3687	1.78962	0.668354	2.67766	0.00741395	0.0599048	NA
ENSDARG00000004672	552.764	-0.0630656	0.138921	-0.453968	0.649852	0.856703	ptk2ab
ENSDARG00000004680	771.276	0.0642363	0.112805	0.569447	0.569053	0.814023	dnajb6a
ENSDARG00000004687	196.292	-0.153181	0.160238	-0.955957	0.339094	0.651189	acaa1
ENSDARG00000004692	943.077	0.160363	0.144467	1.11003	0.266985	0.577583	nabp1a
ENSDARG00000004695	418.659	0.0214989	0.143369	0.149955	0.8808	0.957816	six4a
ENSDARG00000004696	228.609	0.19946	0.162519	1.2273	0.21971	0.525379	eefsec
ENSDARG00000004697	132.152	0.189934	0.187866	1.01101	0.312013	0.625131	rxrgb
ENSDARG00000004706	979.631	-0.00609077	0.124399	-0.0489616	0.96095	0.985516	syf2
ENSDARG00000004712	5.02215	0.693952	0.84216	0.824014	0.409931	0.705176	tbr1b
ENSDARG00000004713	2106.07	0.106272	0.124556	0.853207	0.393545	0.693722	mad2l1
ENSDARG00000004714	497.023	-0.782529	0.26351	-2.96964	0.00298149	0.0302599	tcf12
ENSDARG00000004721	1288.67	-0.479169	0.24417	-1.96244	0.0497115	0.219421	mpp5b
ENSDARG00000004724	4.80243	0.619078	0.933618	0.663095	0.50727	0.774871	tcea3
ENSDARG00000004726	1380.16	0.08509	0.0976357	0.871505	0.383478	0.686882	trappc11
ENSDARG00000004735	56048.4	0.146353	0.105115	1.39232	0.163827	0.448754	hnrnpub
ENSDARG00000004745	2250.11	0.162084	0.105717	1.53318	0.125231	0.385761	lmbr1l
ENSDARG00000004748	3686.2	0.401376	0.296658	1.353	0.176057	0.466493	zgc:100868
ENSDARG00000004753	7.42488	-1.42093	0.673145	-2.11089	0.0347819	0.175449	mylkb
ENSDARG00000004754	2768.48	-0.0441232	0.100903	-0.437284	0.661906	0.862446	hspa4a
ENSDARG00000004757	40506.3	-0.160886	0.0886552	-1.81474	0.0695633	0.269621	ybx1
ENSDARG00000004763	0.460478	2.12192	2.85334	0.743662	0.457081	NA	NA
ENSDARG00000004771	322.417	-0.0682869	0.134261	-0.508612	0.611024	0.837255	ankrd10b
ENSDARG00000004774	3458.54	0.122901	0.0998207	1.23122	0.218241	0.52362	wdr36
ENSDARG00000004782	499.703	0.00808453	0.218614	0.0369808	0.9705	0.988875	fgfr3
ENSDARG00000004785	2546.01	0.095649	0.0939848	1.01771	0.308817	0.621478	cops2
ENSDARG00000004789	60.2736	-0.0832059	0.280697	-0.296426	0.766905	0.912229	lrp1ba
ENSDARG00000004794	14.291	-0.751381	0.508026	-1.47902	0.139135	0.408731	ccdc146
ENSDARG00000004796	490.337	0.482022	0.135611	3.55446	0.000378761	0.00599762	mgrn1b
ENSDARG00000004806	2317.52	0.043181	0.112034	0.385429	0.69992	0.881291	grwd1
ENSDARG00000004823	20.2533	0.437141	0.44113	0.990957	0.321707	0.635271	asz1
ENSDARG00000004830	2906.38	-0.23289	0.120638	-1.93048	0.0535475	0.230139	flot2a
ENSDARG00000004836	1613.74	-0.167795	0.135485	-1.23847	0.215542	0.520058	dnajc5ab
ENSDARG00000004840	314.164	0.0271126	0.146043	0.185648	0.852721	0.947415	rassf1
ENSDARG00000004843	1192.13	-0.314981	0.141691	-2.223	0.0262155	0.14501	foxp1a
ENSDARG00000004851	176.965	0.285332	0.182582	1.56276	0.118109	0.373004	hinfp
ENSDARG00000004861	85.1034	-2.93661	0.307405	-9.5529	1.26115e-21	5.4008e-19	esrrga
ENSDARG00000004864	2.08951	-1.40225	1.48516	-0.944173	0.345081	NA	zgc:171734
ENSDARG00000004866	870.073	0.0625376	0.119797	0.522029	0.60165	0.832453	mindy1
ENSDARG00000004869	8.54827	-1.16484	0.859161	-1.35579	0.175165	0.465654	penka
ENSDARG00000004870	1580.48	0.519122	0.194136	2.67401	0.00749508	0.0603584	psen1
ENSDARG00000004871	2.82629	1.19414	1.07447	1.11137	0.266408	NA	mst1rb
ENSDARG00000004874	442.857	-1.28546	0.269971	-4.76147	1.92192e-06	6.87148e-05	spata6l
ENSDARG00000004875	165.484	0.534904	0.190379	2.80968	0.00495911	0.0448616	tmc6b
ENSDARG00000004877	2289.82	0.0550971	0.118444	0.465174	0.641807	0.853513	rock2b
ENSDARG00000004880	213.7	-0.218108	0.243843	-0.89446	0.371076	0.677784	acsm3
ENSDARG00000004889	258.268	-0.0119919	0.18635	-0.0643513	0.94869	0.981641	aga
ENSDARG00000004891	266.876	0.320984	0.161368	1.98914	0.0466852	0.211141	pex19
ENSDARG00000004898	3.51018	-1.31907	0.993096	-1.32824	0.184098	0.476785	zp2l2
ENSDARG00000004904	20.3772	0.22055	0.461737	0.477653	0.632897	0.84828	gys2
ENSDARG00000004906	2535.16	0.250789	0.0788173	3.18191	0.00146309	0.0173509	stip1
ENSDARG00000004925	102.934	0.597844	0.253714	2.35637	0.0184545	0.113332	immp2l
ENSDARG00000004930	936.366	-0.718893	0.137918	-5.21245	1.86365e-07	8.59198e-06	lmo7a
ENSDARG00000004931	1.24158	0.834657	1.9063	0.437841	0.661501	NA	slc8a3
ENSDARG00000004932	7.17616	-0.323368	0.79019	-0.409229	0.682372	0.871552	anos1b
ENSDARG00000004937	5173.26	0.161033	0.133787	1.20365	0.228724	0.535439	skp2
ENSDARG00000004939	1467.58	-0.0829639	0.101843	-0.814623	0.415288	0.708881	mtdhb
ENSDARG00000004948	2175.58	-0.132548	0.0827343	-1.60209	0.109136	0.355444	bccip
ENSDARG00000004952	0.643628	-0.683234	3.09681	-0.220625	0.825384	NA	rsad2
ENSDARG00000004953	11.138	-0.215543	0.597837	-0.360539	0.718444	0.889635	mxb
ENSDARG00000004954	64.7236	-3.03399	0.390319	-7.7731	7.65884e-15	1.36661e-12	grna
ENSDARG00000004956	1702.51	0.128122	0.105169	1.21824	0.223132	0.52891	zmat2
ENSDARG00000004964	5.20505	-0.77425	1.22416	-0.632472	0.527079	0.788246	cyp4t8
ENSDARG00000004979	410.082	-0.0360157	0.173899	-0.207108	0.835926	0.939645	elovl5
ENSDARG00000004988	6.37257	-1.45858	0.770184	-1.8938	0.0582512	0.241403	ppp3ca
ENSDARG00000005002	238.642	-0.903067	0.189241	-4.77204	1.8237e-06	6.58137e-05	brf1b
ENSDARG00000005004	109.962	-0.580552	0.308637	-1.88102	0.0599696	0.246203	slc5a12
ENSDARG00000005010	296.712	-0.339824	0.157367	-2.15944	0.030816	0.161813	si:dkeyp-2e4.8
ENSDARG00000005015	1340.71	-0.131155	0.128083	-1.02399	0.305842	0.618731	tspy
ENSDARG00000005023	1000.48	-0.517239	0.222043	-2.32945	0.0198352	0.119123	fkbp9
ENSDARG00000005026	81.9085	-0.331845	0.274538	-1.20874	0.226763	0.533157	tshz1
ENSDARG00000005034	177.195	0.047473	0.17306	0.274316	0.783842	0.919528	ispd
ENSDARG00000005049	27.5294	-0.740324	0.356372	-2.07739	0.0377656	0.184716	rab20
ENSDARG00000005057	1537.03	0.292319	0.114192	2.5599	0.0104703	0.075625	dimt1l
ENSDARG00000005058	31443.9	-0.151296	0.111979	-1.35111	0.17666	0.467189	ncapd2
ENSDARG00000005078	1047.37	-0.119035	0.0892273	-1.33407	0.182182	0.474181	eif4e3
ENSDARG00000005085	3.69212	-1.77641	1.34431	-1.32142	0.186361	0.479871	ggctb
ENSDARG00000005092	147.839	0.205568	0.23347	0.88049	0.378594	0.682965	cep89
ENSDARG00000005095	6.26499	-0.629361	0.763781	-0.824007	0.409936	0.705176	glcea
ENSDARG00000005098	1441.38	0.276128	0.144643	1.90903	0.0562584	0.236922	zgc:86764
ENSDARG00000005104	625.351	0.536758	0.151479	3.54344	0.00039494	0.00621805	limk2
ENSDARG00000005108	2923.6	0.271828	0.117647	2.31053	0.0208589	0.12376	oclna
ENSDARG00000005112	161.247	0.599368	0.34121	1.7566	0.0789866	0.292826	cdh17
ENSDARG00000005115	1436.44	0.102174	0.099625	1.02558	0.305087	0.618162	calub
ENSDARG00000005122	11317.2	0.241918	0.148821	1.62556	0.104042	0.345929	atp2a2b
ENSDARG00000005126	690.243	-0.483684	0.128619	-3.76061	0.000169499	0.00316207	large1
ENSDARG00000005128	645.402	-0.248756	0.262402	-0.947993	0.343133	0.655613	rnaseh2b
ENSDARG00000005134	3455.73	0.138178	0.0906041	1.52507	0.127241	0.389412	psmd11b
ENSDARG00000005139	68.1611	-1.38776	0.271247	-5.11621	3.1173e-07	1.35301e-05	hhatlb
ENSDARG00000005141	0.530434	-0.657119	3.24206	-0.202686	0.839381	NA	camkvb
ENSDARG00000005150	91.1064	4.39312	0.469437	9.35828	8.10476e-21	3.12374e-18	tbx20
ENSDARG00000005154	264.15	0.157671	0.187933	0.838979	0.401481	0.698409	aspa
ENSDARG00000005159	101.724	-0.0138171	0.208515	-0.0662643	0.947167	0.981007	cyth1a
ENSDARG00000005162	16409.9	0.165486	0.095117	1.73981	0.0818922	0.298721	tpm3
ENSDARG00000005163	436.187	-0.145611	0.191604	-0.759955	0.447281	0.73269	efr3a
ENSDARG00000005172	551.317	0.23768	0.1491	1.5941	0.110914	0.358561	dynll2b
ENSDARG00000005176	133.889	0.393619	0.457834	0.859742	0.389931	0.691378	zgc:101040
ENSDARG00000005179	16.3326	0.226499	0.495474	0.457137	0.647572	0.85619	dglucy
ENSDARG00000005185	1567.42	0.259003	0.0975533	2.65499	0.0079311	0.0626651	cpn1
ENSDARG00000005186	353.775	-0.136281	0.196844	-0.69233	0.48873	0.763606	sp4
ENSDARG00000005191	2091.95	0.127788	0.139645	0.915093	0.360143	0.669526	ahcy
ENSDARG00000005210	1222.14	0.0461861	0.191007	0.241803	0.808933	0.927943	coro2a
ENSDARG00000005216	68.5558	-0.446508	0.387611	-1.15195	0.249343	0.560153	NA
ENSDARG00000005218	99.4508	-0.142895	0.243053	-0.587918	0.556587	0.805497	wrnip1
ENSDARG00000005220	61.1507	0.531686	0.310389	1.71296	0.0867191	0.309193	pdcd6
ENSDARG00000005221	0.852863	-2.11959	2.18776	-0.968843	0.332624	NA	desmb
ENSDARG00000005230	7308.54	0.356243	0.108766	3.27531	0.00105548	0.0134525	ssr2
ENSDARG00000005232	189.213	-0.283751	0.195365	-1.45241	0.146388	0.421085	ccdc85ca
ENSDARG00000005236	11319.3	-0.097395	0.273539	-0.356055	0.721799	0.891036	srcap
ENSDARG00000005246	345.157	-0.0661716	0.122819	-0.538771	0.590045	0.825523	asb3
ENSDARG00000005251	1740.7	0.359183	0.0842688	4.26235	2.02292e-05	0.000536228	rpe
ENSDARG00000005254	7939.74	0.463462	0.193411	2.39626	0.0165635	0.105102	kdelr2a
ENSDARG00000005271	158.31	0.0147843	0.19466	0.075949	0.93946	0.978457	zc3h12a
ENSDARG00000005274	476.273	0.117082	0.113084	1.03535	0.300504	0.613401	rad52
ENSDARG00000005284	77.6701	1.0098	0.308093	3.27759	0.00104697	0.0133706	fbxl15
ENSDARG00000005314	0.12024	0	4.08052	0	1	NA	si:dkeyp-80c12.5
ENSDARG00000005315	8864.27	-0.0699205	0.165377	-0.422794	0.672446	0.867553	celf1
ENSDARG00000005318	1203.22	0.178501	0.092984	1.9197	0.054896	0.233378	stam2
ENSDARG00000005320	2212.52	-0.640443	0.254724	-2.51426	0.0119282	0.0833157	nipsnap1
ENSDARG00000005327	0.105988	-0.683232	4.08052	-0.167437	0.867026	NA	NA
ENSDARG00000005332	0.693858	1.80063	2.59772	0.69316	0.488209	NA	lipib
ENSDARG00000005335	0.457139	1.24035	3.33116	0.372348	0.709634	NA	NA
ENSDARG00000005343	5.07413	-0.19554	0.847806	-0.230643	0.817592	0.931788	ccdc85al
ENSDARG00000005350	2612.03	-0.0868658	0.0849267	-1.02283	0.306387	0.619157	dip2ba
ENSDARG00000005355	84.9777	-0.128806	0.220024	-0.585419	0.558266	0.806658	larp6a
ENSDARG00000005356	579.136	-0.362142	0.191878	-1.88735	0.0591127	0.243809	tyro3
ENSDARG00000005359	1220.03	0.127861	0.0991205	1.28996	0.197065	0.494084	sucla2
ENSDARG00000005364	342.989	-1.07447	0.260168	-4.12989	3.6294e-05	0.000877568	grin3ba
ENSDARG00000005368	102.914	-0.254448	0.265415	-0.95868	0.33772	0.649845	mcamb
ENSDARG00000005371	4.1361	0.751135	1.11065	0.676304	0.498848	0.769997	gprc6a
ENSDARG00000005372	3.97664	0.641418	1.13171	0.566768	0.570872	0.814667	camk4
ENSDARG00000005374	359.329	0.0377568	0.171767	0.219815	0.826015	0.935325	tubgcp4
ENSDARG00000005382	1152.39	0.0309916	0.109119	0.284017	0.776397	0.916559	prdm9
ENSDARG00000005392	26.8036	0.00847042	0.401963	0.0210726	0.983188	0.993811	slc5a5
ENSDARG00000005394	83.3954	-0.943194	0.477808	-1.974	0.0483818	0.215975	dnmt3aa
ENSDARG00000005397	879.937	-0.933876	0.162051	-5.76285	8.27045e-09	5.05967e-07	trim3b
ENSDARG00000005414	4.16156	0.394766	0.90051	0.438381	0.66111	0.862216	grapa
ENSDARG00000005416	152.686	-0.145774	0.190419	-0.765543	0.443948	0.730475	map3k5
ENSDARG00000005423	229.851	0.160296	0.184076	0.870811	0.383858	0.686883	pgam1a
ENSDARG00000005425	456.223	-0.0967912	0.15946	-0.606995	0.543854	0.798588	wdfy1
ENSDARG00000005448	138.371	0.287199	0.225177	1.27544	0.202154	0.501659	mtfmt
ENSDARG00000005451	3205.31	-0.0376539	0.0828686	-0.45438	0.649555	0.856488	gdi2
ENSDARG00000005453	189.711	0.0766658	0.203954	0.375898	0.706993	0.884959	foxp2
ENSDARG00000005454	3828.17	-0.0353631	0.118889	-0.297447	0.766125	0.91218	tacc3
ENSDARG00000005456	1231.91	0.0846156	0.0997204	0.848528	0.396144	0.694766	katnb1
ENSDARG00000005458	1682.59	-0.135012	0.0924378	-1.46057	0.144133	0.417432	csnk1g2a
ENSDARG00000005462	4492.25	-0.272746	0.096002	-2.84104	0.00449666	0.0416411	kif4
ENSDARG00000005463	839.843	-0.063496	0.146976	-0.432015	0.66573	0.864432	slc30a1a
ENSDARG00000005464	114.278	0.444911	0.217823	2.04253	0.0410987	0.194998	dnase1l1
ENSDARG00000005468	693.379	0.0344262	0.125237	0.274889	0.783402	0.91949	irf2bp1
ENSDARG00000005476	46.2538	-0.000473517	0.296538	-0.00159682	0.998726	0.999541	nav3
ENSDARG00000005479	448.706	-1.14266	0.338897	-3.3717	0.000747069	0.0103055	tenm3
ENSDARG00000005481	229.144	0.0693709	0.26253	0.26424	0.791595	0.922244	nfkbiaa
ENSDARG00000005482	224.346	-0.580298	0.169656	-3.42045	0.000625179	0.00897751	rapgef2
ENSDARG00000005485	0.105988	-0.683232	4.08052	-0.167437	0.867026	NA	NA
ENSDARG00000005500	118.895	-0.40476	0.2272	-1.78151	0.0748293	0.283316	dgcr6
ENSDARG00000005510	0.262798	-2.01784	4.00412	-0.50394	0.614303	NA	NA
ENSDARG00000005513	10961.1	0.0353859	0.107681	0.328618	0.742444	0.901723	naca
ENSDARG00000005518	1.42581	0.403165	1.83053	0.220244	0.825681	NA	slc5a9
ENSDARG00000005525	1648.78	0.29039	0.12995	2.23462	0.025442	0.142238	acy3.2
ENSDARG00000005526	3.55094	-0.801576	1.25403	-0.639202	0.522692	0.785155	igfn1.1
ENSDARG00000005536	1216.25	-0.14033	0.119871	-1.17067	0.241731	0.55168	ubr7
ENSDARG00000005540	4714.79	-0.207653	0.118428	-1.75342	0.0795307	0.293732	xpo7
ENSDARG00000005541	55.1966	-0.253415	0.449196	-0.564151	0.572651	0.815516	wif1
ENSDARG00000005544	108.342	-0.215379	0.192294	-1.12005	0.262692	0.573344	btbd3a
ENSDARG00000005547	110.001	0.296684	0.231578	1.28114	0.200144	0.498703	rint1
ENSDARG00000005549	470.731	0.0373711	0.146008	0.255953	0.797987	0.923661	znf710b
ENSDARG00000005551	16318.3	0.175705	0.0919997	1.90984	0.0561537	0.236742	hnrnph1l
ENSDARG00000005559	0.751181	0.221536	2.34166	0.0946063	0.924628	NA	pou4f1
ENSDARG00000005560	962.867	-0.183136	0.179549	-1.01998	0.30774	0.62034	ywhah
ENSDARG00000005561	384.483	0.284955	0.142217	2.00367	0.0451052	0.206761	gfm2
ENSDARG00000005565	3.28054	0.67512	1.16717	0.578426	0.562976	0.810262	entpd8
ENSDARG00000005574	19.9156	0.743195	0.476007	1.56131	0.11845	0.373654	vsx2
ENSDARG00000005576	6555.5	-0.0446446	0.0761839	-0.586012	0.557868	0.806315	mphosph8
ENSDARG00000005578	18.0328	-0.431974	0.60812	-0.710344	0.477491	0.755366	ugp2a
ENSDARG00000005586	3.25118	-1.63606	1.08935	-1.50187	0.133131	0.398392	zbtb20
ENSDARG00000005590	2256.02	-0.189985	0.108508	-1.75089	0.0799643	0.294363	mtf2
ENSDARG00000005593	67.4733	-0.292953	0.259205	-1.1302	0.258393	0.569567	rxrga
ENSDARG00000005595	154.527	1.87364	0.291335	6.43122	1.26583e-10	1.10881e-08	adgb
ENSDARG00000005606	3503.93	0.183816	0.0754544	2.43612	0.0148456	0.0974419	paxip1
ENSDARG00000005612	1423.29	-0.0563537	0.103675	-0.543559	0.586745	0.823776	aph1b
ENSDARG00000005616	3.55275	-0.609097	1.23819	-0.491923	0.622773	0.843155	bfb
ENSDARG00000005619	597.434	0.235521	0.121926	1.93167	0.0534007	0.229707	nek2
ENSDARG00000005625	495.899	0.255824	0.154798	1.65263	0.0984052	0.334762	maco1a
ENSDARG00000005626	10.2358	-0.206132	0.670027	-0.307648	0.75835	0.908912	si:ch211-133l11.10
ENSDARG00000005627	9.26261	1.14218	0.661876	1.72567	0.0844075	0.304024	zmp:0000000527
ENSDARG00000005629	9.10905	-0.372274	0.640414	-0.581302	0.561037	0.808778	smyd2b
ENSDARG00000005640	181.236	-0.0196506	0.186242	-0.105511	0.915971	0.968967	adat3
ENSDARG00000005643	460.534	0.474977	0.160728	2.95516	0.00312505	0.0313824	gcat
ENSDARG00000005645	3454.83	-0.31455	0.165549	-1.90004	0.0574278	0.239285	robo3
ENSDARG00000005648	10.992	0.524254	0.629591	0.83269	0.40502	0.701144	olfml2a
ENSDARG00000005651	865.864	-0.325579	0.160963	-2.0227	0.0431046	0.20079	hrasb
ENSDARG00000005652	1072.31	0.182336	0.133378	1.36706	0.171608	0.460465	man1a1
ENSDARG00000005670	43.4112	1.36331	0.497788	2.73873	0.00616771	0.0525455	ttbk2a
ENSDARG00000005673	27.5694	0.453849	0.468036	0.969688	0.332202	0.644603	f3b
ENSDARG00000005675	15771.9	0.588484	0.109721	5.36346	8.16443e-08	4.07608e-06	sec61a1l
ENSDARG00000005679	413.614	-0.051942	0.198511	-0.261658	0.793585	0.922781	trip10a
ENSDARG00000005690	842.245	0.0676916	0.154644	0.437726	0.661585	0.86232	slc25a23a
ENSDARG00000005699	17725.4	-0.0812587	0.154016	-0.527599	0.597777	0.830001	ddx19
ENSDARG00000005704	4.64022	2.34539	1.04714	2.2398	0.0251041	0.140839	eps8l3b
ENSDARG00000005713	20.2281	0.378574	0.412692	0.91733	0.35897	0.668529	ethe1
ENSDARG00000005716	3.40562	-0.3574	1.03716	-0.344594	0.7304	0.89597	olfml2ba
ENSDARG00000005738	1464.16	-0.217482	0.0952908	-2.2823	0.0224719	0.130282	rpf1
ENSDARG00000005739	6.21162	-0.373855	0.834198	-0.448161	0.654037	0.858478	gpm6ba
ENSDARG00000005749	3.83528	-1.20765	1.18363	-1.02029	0.30759	0.620167	cand2
ENSDARG00000005754	2652.99	-0.319384	0.183508	-1.74043	0.0817827	0.298537	ptprfb
ENSDARG00000005762	296.654	0.00718942	0.247018	0.0291048	0.976781	0.991311	col14a1a
ENSDARG00000005772	1961.17	0.0115736	0.114458	0.101116	0.919458	0.970685	tsr2
ENSDARG00000005774	9334.42	-0.160125	0.222864	-0.718486	0.472457	0.751587	ddx3xb
ENSDARG00000005775	18.1847	1.22588	0.475064	2.58045	0.00986703	0.0727977	scn8aa
ENSDARG00000005776	0.225719	0	4.08052	0	1	NA	guk1b
ENSDARG00000005780	2.07473	0.340928	1.38772	0.245676	0.805933	NA	npy8br
ENSDARG00000005783	46.3664	-0.966669	0.362605	-2.6659	0.00767818	0.0613216	ncanb
ENSDARG00000005786	395.944	0.090415	0.126826	0.712907	0.475904	0.754418	ppm1f
ENSDARG00000005789	338.798	-0.243466	0.156565	-1.55505	0.119935	0.375998	enpp1
ENSDARG00000005791	10434.3	0.139682	0.151363	0.922826	0.356098	0.666031	rpl28
ENSDARG00000005799	85.9272	0.137796	0.243719	0.565389	0.571809	0.815341	smim14
ENSDARG00000005800	0.511156	-1.14983	2.73932	-0.419751	0.674667	NA	ampd3a
ENSDARG00000005814	2.49113	-3.36112	1.56885	-2.14241	0.0321605	NA	klhl10a
ENSDARG00000005821	9.87583	0.530007	0.575861	0.920372	0.357378	0.667169	ncf2
ENSDARG00000005823	2377.64	0.00862579	0.140613	0.061344	0.951085	0.982227	slc39a10
ENSDARG00000005827	4109.1	-0.105516	0.0905094	-1.1658	0.243695	0.553924	eif2s1a
ENSDARG00000005828	126.506	1.30296	0.23451	5.5561	2.75861e-08	1.51889e-06	faima
ENSDARG00000005834	379.812	-0.0351673	0.159326	-0.220726	0.825306	0.934977	gatad2b
ENSDARG00000005840	415.451	0.190803	0.156142	1.22198	0.221715	0.527035	got2b
ENSDARG00000005841	0.225719	0	4.08052	0	1	NA	NA
ENSDARG00000005842	136.012	-0.478791	0.290948	-1.64563	0.0998409	0.337431	cd9a
ENSDARG00000005846	0.578162	2.11402	2.44516	0.864575	0.387272	NA	SP5 (1 of many)
ENSDARG00000005853	0.564625	0.812178	2.31722	0.350497	0.725966	NA	slc25a6
ENSDARG00000005861	284.372	0.33283	0.202507	1.64354	0.100271	0.338172	ralgapa2
ENSDARG00000005865	0.57429	1.16041	2.76527	0.419637	0.674751	NA	NA
ENSDARG00000005867	4069.1	0.0851386	0.104575	0.81414	0.415565	0.709044	gon4l
ENSDARG00000005870	483.704	0.0484892	0.119628	0.405335	0.685231	0.873642	mmadhc
ENSDARG00000005883	170.067	0.126287	0.229025	0.551411	0.581352	0.820569	rfx1a
ENSDARG00000005891	277.084	0.203631	0.173029	1.17685	0.239254	0.548231	cyb5r3
ENSDARG00000005894	0.976841	-1.96412	1.96572	-0.999183	0.317706	NA	slc7a9
ENSDARG00000005897	135.589	0.446496	0.230789	1.93465	0.0530333	0.228943	dera
ENSDARG00000005908	1356.81	-0.0986622	0.112065	-0.880402	0.378642	0.682965	clk4b
ENSDARG00000005913	14.2178	-0.222173	0.632095	-0.351486	0.725223	0.892565	tgm1l3
ENSDARG00000005915	4106.45	-0.0368738	0.119847	-0.307674	0.75833	0.908912	tcf3a
ENSDARG00000005916	10.8882	0.821728	0.623914	1.31705	0.187821	0.482187	srpk3
ENSDARG00000005924	209.752	0.422301	0.240997	1.75231	0.0797204	0.293869	serpina10a
ENSDARG00000005926	1232.96	-0.0131807	0.103717	-0.127084	0.898874	0.964112	ak2
ENSDARG00000005927	2100.47	-0.0825153	0.113491	-0.727062	0.467188	0.747028	tbc1d17
ENSDARG00000005941	3156.58	-0.16426	0.0836727	-1.96312	0.0496321	0.21917	yes1
ENSDARG00000005942	0.341885	-0.683232	4.08052	-0.167437	0.867026	NA	v2rl1
ENSDARG00000005943	1.04164	-2.84026	2.36455	-1.20118	0.22968	NA	htra4
ENSDARG00000005945	10427.5	0.0695715	0.093788	0.741796	0.458211	0.74197	sart1
ENSDARG00000005948	599.438	0.135764	0.145048	0.935993	0.349277	0.660552	ankmy2a
ENSDARG00000005972	215.759	0.497402	0.182408	2.72686	0.00639398	0.0538542	ric8b
ENSDARG00000005980	1747.18	-0.149978	0.110939	-1.3519	0.176406	0.467032	sfswap
ENSDARG00000005989	3482.68	-0.311116	0.11545	-2.69481	0.0070429	0.0576322	rgl1
ENSDARG00000005993	614.379	-0.0830953	0.151577	-0.548204	0.583552	0.821929	prc1b
ENSDARG00000006003	3027.38	-0.0278087	0.109397	-0.2542	0.799341	0.924394	mycla
ENSDARG00000006008	0.210073	0.278557	4.08052	0.0682649	0.945575	NA	dct
ENSDARG00000006010	108.546	-1.09476	0.351361	-3.11578	0.00183457	0.020699	bmi1a
ENSDARG00000006011	100.145	0.11811	0.248053	0.476147	0.633969	0.848676	klhl42
ENSDARG00000006019	9727.29	0.292371	0.0919534	3.17956	0.00147499	0.0174598	tktb
ENSDARG00000006025	25.2832	-0.130542	0.407482	-0.320362	0.748694	0.904625	tp53i11b
ENSDARG00000006029	953.654	0.496299	0.162181	3.06016	0.00221216	0.0239363	lta4h
ENSDARG00000006031	2422.77	-0.0779218	0.198238	-0.393073	0.694266	0.878633	abat
ENSDARG00000006038	2097.78	-0.260081	0.101473	-2.56306	0.0103755	0.0753946	aebp2
ENSDARG00000006040	425.06	0.506606	0.224998	2.2516	0.0243476	0.137758	cyp20a1
ENSDARG00000006044	44.8026	-1.15368	0.300286	-3.84192	0.000122075	0.00242906	ust
ENSDARG00000006052	79.7647	-0.325698	0.239019	-1.36264	0.172995	0.462512	malt2
ENSDARG00000006060	2830.28	0.119604	1.00222	0.119338	0.905007	0.965478	crybg1b
ENSDARG00000006062	7169.32	-0.138359	0.178953	-0.773161	0.439427	0.727346	akap1b
ENSDARG00000006065	5.72566	-0.905618	0.760933	-1.19014	0.23399	0.541714	znf385b
ENSDARG00000006074	471.963	0.392299	0.1417	2.76852	0.00563124	0.0491261	uck2a
ENSDARG00000006079	5.34562	0.474546	0.766967	0.618731	0.536094	0.793781	gpr37l1a
ENSDARG00000006092	29339.1	-0.00715808	0.0793343	-0.0902268	0.928107	0.973552	rad21a
ENSDARG00000006093	14.7232	-0.517391	0.757103	-0.683383	0.494365	0.767494	cdk15
ENSDARG00000006094	6186.3	0.236878	0.119439	1.98326	0.0473382	0.212994	igf2r
ENSDARG00000006109	1.9519	-1.63105	1.56543	-1.04191	0.297452	NA	NA
ENSDARG00000006110	12658.8	0.174547	0.114767	1.52088	0.12829	0.390873	chrd
ENSDARG00000006112	1071.4	-0.681704	0.166746	-4.08829	4.34561e-05	0.00101263	myof
ENSDARG00000006120	226.094	0.137402	0.300059	0.457917	0.647012	0.856178	tbx2b
ENSDARG00000006124	9923.45	-0.194818	0.0782297	-2.49034	0.0127621	0.0872744	kdm5c
ENSDARG00000006125	4196.52	0.204942	0.142116	1.44208	0.149281	0.425372	csnk1db
ENSDARG00000006128	341.234	-0.535871	0.153306	-3.49544	0.000473281	0.00716465	cep170aa
ENSDARG00000006137	1.102	-1.3936	2.07823	-0.670571	0.502494	NA	NA
ENSDARG00000006151	8.27478	2.49261	0.974609	2.55755	0.0105414	0.0759981	pde11al
ENSDARG00000006169	133.119	0.188804	0.223487	0.84481	0.398217	0.695962	lrrk2
ENSDARG00000006174	9.97204	0.0253037	0.638125	0.0396532	0.96837	0.988477	lrrc23
ENSDARG00000006181	6.5588	0.0615529	0.797777	0.0771556	0.9385	0.978074	hif1aa
ENSDARG00000006192	2944.53	-0.117829	0.113379	-1.03925	0.29869	0.611112	gatad2ab
ENSDARG00000006196	648.287	-0.142791	0.120607	-1.18393	0.23644	0.544612	sav1
ENSDARG00000006200	26595.5	-0.103866	0.15804	-0.657211	0.511045	0.77742	eif4g1a
ENSDARG00000006202	1619.82	0.178177	0.135961	1.31051	0.190025	0.485263	erbb3a
ENSDARG00000006207	6.48186	-0.870002	0.776195	-1.12085	0.26235	0.573063	gpx1b
ENSDARG00000006215	6.21125	-0.408403	0.81563	-0.500721	0.616568	0.840243	akr1b1
ENSDARG00000006219	7473.34	0.0827395	0.105301	0.785743	0.432018	0.721651	gnl3
ENSDARG00000006220	1.74663	-0.743584	1.39959	-0.531289	0.595219	NA	ugt1a2
ENSDARG00000006225	21673.9	-0.30346	0.105604	-2.87357	0.00405867	0.0384914	ddx39aa
ENSDARG00000006235	1439.43	-0.0680474	0.134081	-0.507511	0.611796	0.837807	brms1la
ENSDARG00000006240	270.507	0.450172	0.190398	2.36437	0.0180605	0.111624	slc27a1a
ENSDARG00000006242	6638.27	-0.101758	0.123514	-0.823858	0.41002	0.705176	ptp4a1
ENSDARG00000006251	1337.28	-0.128394	0.101934	-1.25957	0.207823	0.509476	ell2
ENSDARG00000006253	1772.48	0.148226	0.113744	1.30315	0.192522	0.488094	mier3a
ENSDARG00000006257	199.637	-0.0963133	0.294877	-0.326622	0.743954	0.902646	vldlr
ENSDARG00000006260	56490.8	0.197892	0.114399	1.72984	0.0836594	0.302647	tuba8l4
ENSDARG00000006266	211.777	-0.0170358	0.178562	-0.0954059	0.923992	0.972215	stat1a
ENSDARG00000006272	685.299	0.284569	0.223385	1.27389	0.202701	0.502218	mpp5a
ENSDARG00000006279	23.8207	-0.0493751	0.513959	-0.0960683	0.923466	0.97221	rragd
ENSDARG00000006283	1085.1	0.102234	0.175549	0.582367	0.56032	0.808324	waslb
ENSDARG00000006288	57.146	0.433614	0.381449	1.13676	0.25564	0.56718	prdm5
ENSDARG00000006290	838.988	-0.110951	0.182085	-0.609333	0.542304	0.797766	ndufs5
ENSDARG00000006292	6.13187	-0.496247	0.735713	-0.674512	0.499986	0.771003	maats1
ENSDARG00000006299	892.648	0.316736	0.126619	2.50149	0.0123671	0.0855441	arhgef7a
ENSDARG00000006300	806.378	0.261202	0.172083	1.51788	0.129045	0.392548	psmd9
ENSDARG00000006301	337.7	0.286214	0.59303	0.48263	0.629359	0.846733	raph1a
ENSDARG00000006307	25.7738	0.783925	0.413431	1.89614	0.0579413	0.240747	shisa4
ENSDARG00000006308	4.30289	0.836839	0.932379	0.897531	0.369436	0.676862	ptpn18
ENSDARG00000006314	2874.41	-0.270744	0.0982264	-2.75633	0.00584543	0.0504634	itgav
ENSDARG00000006316	15514	0.0290641	0.155402	0.187025	0.851641	0.946918	rpl23a
ENSDARG00000006332	1455	0.167644	0.141316	1.1863	0.235503	0.543453	snx14
ENSDARG00000006341	0.101405	-0.683232	4.08052	-0.167437	0.867026	NA	tas1r3
ENSDARG00000006345	629.974	-0.291585	0.122073	-2.38862	0.0169119	0.106437	med17
ENSDARG00000006350	116.442	-0.338019	0.20419	-1.65541	0.0978405	0.333475	nkx1.2la
ENSDARG00000006353	8051.73	0.139858	0.184653	0.757414	0.448802	0.734109	itga5
ENSDARG00000006356	0.467086	0	4.08052	0	1	NA	slc18a3a
ENSDARG00000006368	10.646	-0.601739	0.597766	-1.00665	0.314105	0.627462	crlf1b
ENSDARG00000006370	452.747	0.470966	0.204086	2.30768	0.0210167	0.12439	atp6v1h
ENSDARG00000006383	5.25185	0.187432	0.892241	0.210069	0.833614	0.939272	stxbp5l
ENSDARG00000006385	361.823	0.171453	0.167199	1.02545	0.305153	0.61823	triobpb
ENSDARG00000006389	1452.92	-0.0335722	0.157946	-0.212555	0.831674	0.93836	smad2
ENSDARG00000006392	1371.23	0.101422	0.109489	0.92632	0.35428	0.66446	exosc9
ENSDARG00000006395	8452.02	0.38511	0.121261	3.17589	0.0014938	0.0176067	rbm25b
ENSDARG00000006396	119.323	1.03823	0.288913	3.59358	0.000326163	0.00536304	nrcama
ENSDARG00000006397	713.459	0.0731152	0.105097	0.695694	0.486621	0.761731	laptm4a
ENSDARG00000006399	4876.16	0.0133451	0.106606	0.125182	0.90038	0.964278	ywhae1
ENSDARG00000006408	1497.38	0.0757343	0.155647	0.486579	0.626557	0.844785	hmgb3b
ENSDARG00000006409	2110.88	0.177979	0.1408	1.26406	0.206209	0.507323	mapk12b
ENSDARG00000006413	4626.38	-0.196497	0.151675	-1.29552	0.195141	0.491833	rpl38
ENSDARG00000006420	810.397	-1.19502	0.15897	-7.51722	5.59514e-14	8.69548e-12	atrnl1b
ENSDARG00000006422	380.35	-0.0589528	0.15756	-0.374162	0.708284	0.885631	esyt3
ENSDARG00000006427	2093.08	-0.117382	0.284261	-0.412937	0.679653	0.870619	fabp2
ENSDARG00000006434	1903.64	0.017315	0.122111	0.141797	0.88724	0.960424	polr1e
ENSDARG00000006447	10.3986	2.00934	0.771919	2.60305	0.00923993	0.0698285	slc19a3a
ENSDARG00000006456	0.455688	1.24035	2.89127	0.428998	0.667925	NA	pdgfrl
ENSDARG00000006467	2841.03	0.160984	0.169476	0.949895	0.342166	0.654739	pcdh8
ENSDARG00000006468	2.31723	-1.74164	1.27443	-1.3666	0.17175	NA	grap2a
ENSDARG00000006474	3.53897	-1.17928	1.17867	-1.00051	0.317062	0.630479	saxo2
ENSDARG00000006477	1634.99	-0.00426188	0.161228	-0.0264338	0.978911	0.992551	ddi2
ENSDARG00000006487	28544.5	0.0879238	0.085332	1.03037	0.302835	0.615735	anp32a
ENSDARG00000006491	119.905	-0.752322	0.433749	-1.73446	0.0828357	0.300796	agpat9l
ENSDARG00000006494	1494.56	-0.108687	0.150813	-0.720675	0.47111	0.750844	asb7
ENSDARG00000006497	373.335	-0.290819	0.181131	-1.60557	0.108368	0.35366	rtn1a
ENSDARG00000006508	97.3856	-0.736327	0.45991	-1.60103	0.109371	0.355848	pip5k1bb
ENSDARG00000006514	2465.2	-0.187836	0.190361	-0.986736	0.323772	0.637572	her6
ENSDARG00000006522	1.02286	0.317884	2.7561	0.115338	0.908177	NA	otop2
ENSDARG00000006524	12609.4	-0.0611324	0.154332	-0.39611	0.692024	0.877301	supt6h
ENSDARG00000006526	3779.59	-0.457675	0.160975	-2.84315	0.00446705	0.0413945	fn1b
ENSDARG00000006527	12324.1	0.0993631	0.128933	0.770658	0.44091	0.728345	brd3a
ENSDARG00000006544	12.0041	3.01073	0.995633	3.02394	0.00249509	0.0263612	NA
ENSDARG00000006545	583.303	-0.0641277	0.132204	-0.485066	0.62763	0.845451	rgp1
ENSDARG00000006546	155.506	0.0990408	0.163391	0.606158	0.54441	0.798799	ak4
ENSDARG00000006553	710.659	-0.104322	0.156954	-0.664667	0.506264	0.774241	rras
ENSDARG00000006560	1.32179	-1.04952	1.74689	-0.600796	0.547976	NA	NA
ENSDARG00000006566	5600.08	0.0312733	0.0712169	0.439127	0.660569	0.862067	nlk1
ENSDARG00000006567	309.244	0.0573176	0.167428	0.342342	0.732093	0.897032	dus4l
ENSDARG00000006568	0.334666	0	4.08052	0	1	NA	kcnmb2
ENSDARG00000006577	474.926	0.100176	0.143426	0.69845	0.484896	0.760451	nadka
ENSDARG00000006580	61.7413	-0.495635	0.282386	-1.75517	0.0792308	0.293232	cldnd
ENSDARG00000006584	5521.81	0.000543101	0.104651	0.00518962	0.995859	0.998843	phf8
ENSDARG00000006585	341.994	-0.156635	0.127244	-1.23098	0.218329	0.523702	DMWD
ENSDARG00000006588	16.6575	-5.45153	0.977624	-5.5763	2.45687e-08	1.36839e-06	NA
ENSDARG00000006598	12.0559	0.957638	0.57756	1.65807	0.0973024	0.332169	sgk2b
ENSDARG00000006600	2044.11	0.0995609	0.140739	0.707416	0.479308	0.756242	lsm14aa
ENSDARG00000006601	449.658	0.0862983	0.126233	0.68364	0.494203	0.767494	kaznb
ENSDARG00000006602	110.157	-3.56009	0.382883	-9.29812	1.42948e-20	5.40146e-18	chrna2a
ENSDARG00000006603	700.937	0.112977	0.182585	0.618762	0.536073	0.793781	csrp1a
ENSDARG00000006604	233.065	-0.212546	0.187664	-1.13259	0.257387	0.56908	nectin3b
ENSDARG00000006607	1.07287	-1.93458	1.9587	-0.987683	0.323308	NA	gpr27
ENSDARG00000006609	2263.25	0.126329	0.0974908	1.2958	0.195043	0.491725	map2k2a
ENSDARG00000006615	4161.22	-0.0797355	0.165544	-0.481656	0.63005	0.846733	hnf1ba
ENSDARG00000006617	205.029	-0.237405	0.177832	-1.33499	0.181878	0.473901	napga
ENSDARG00000006621	1349.88	-0.0762464	0.085637	-0.890344	0.373281	0.678735	pspc1
ENSDARG00000006624	2134.07	-0.151131	0.11766	-1.28447	0.198978	0.496984	ppp2r2ab
ENSDARG00000006636	27.5074	1.15314	0.352712	3.26934	0.00107798	0.0136759	slitrk2
ENSDARG00000006639	600.116	-0.0649345	0.147422	-0.440468	0.659599	0.861654	lnpk
ENSDARG00000006640	85.7045	0.717313	0.335882	2.13561	0.032711	0.168639	eomesa
ENSDARG00000006642	2219.62	0.0926355	0.116441	0.795556	0.42629	0.716656	drg2
ENSDARG00000006666	1342.62	-0.127034	0.111614	-1.13815	0.255059	0.566768	si:dkeyp-69c1.6
ENSDARG00000006672	211.406	0.25482	0.199729	1.27583	0.202017	0.501479	fam49a
ENSDARG00000006677	344.31	-0.157335	0.147559	-1.06625	0.286311	0.59862	ripk1l
ENSDARG00000006678	63.7113	-3.14244	0.363197	-8.65216	5.05358e-18	1.41141e-15	pth2r
ENSDARG00000006683	3521.02	0.415153	0.153829	2.6988	0.00695903	0.057213	arhgef6
ENSDARG00000006691	25980.2	0.283287	0.125841	2.25115	0.024376	0.137837	rpl12
ENSDARG00000006712	62.3995	-0.372662	0.320928	-1.1612	0.245561	0.555506	wipf2b
ENSDARG00000006719	1238.78	-0.120728	0.0905464	-1.33333	0.182423	0.474539	specc1la
ENSDARG00000006747	1.15456	-0.97596	1.96125	-0.497622	0.618751	NA	tmem178b
ENSDARG00000006754	104.388	-0.692608	0.324048	-2.13736	0.0325686	0.168175	mllt3
ENSDARG00000006757	2.00545	-1.63915	1.40533	-1.16638	0.24346	NA	klhl41b
ENSDARG00000006758	205.666	-0.590204	0.2835	-2.08185	0.0373562	0.183655	fam234b
ENSDARG00000006760	77.2992	0.449553	0.256147	1.75506	0.0792487	0.293241	slc24a3
ENSDARG00000006766	6877.41	0.218386	0.117612	1.85683	0.0633348	0.254541	snd1
ENSDARG00000006773	12.7164	-0.0599539	0.537164	-0.111612	0.911131	0.966819	elovl4a
ENSDARG00000006775	20.6621	-1.08682	0.446724	-2.43288	0.0149795	0.0980301	cass4
ENSDARG00000006782	2792.86	-0.0632719	0.122818	-0.515167	0.606436	0.834521	rb1
ENSDARG00000006786	195.599	0.432636	0.25939	1.6679	0.0953355	0.328249	copz2
ENSDARG00000006791	432.478	0.322193	0.140474	2.29362	0.0218126	0.127633	arntl1a
ENSDARG00000006797	48.9892	0.240072	0.264266	0.90845	0.36364	0.671854	nt5dc1
ENSDARG00000006812	1681.22	-0.216282	0.0974803	-2.21873	0.0265052	0.146055	wdr26b
ENSDARG00000006816	14.0652	2.60718	0.702086	3.71348	0.000204426	0.00367148	gtf2f2b
ENSDARG00000006818	767.536	0.492458	0.133618	3.68557	0.000228193	0.00401965	urod
ENSDARG00000006832	47.7836	0.343087	0.40212	0.853195	0.393551	0.693722	galnt9
ENSDARG00000006837	2062.77	-0.106056	0.168336	-0.630025	0.528678	0.788801	mycn
ENSDARG00000006838	3.25899	2.2218	1.54906	1.43429	0.151489	0.428684	eef1a2
ENSDARG00000006840	179.993	1.7174	0.325169	5.28155	1.28097e-07	6.15598e-06	gnmt
ENSDARG00000006848	125.189	2.57614	0.226168	11.3904	4.66948e-30	3.3328e-27	parp9
ENSDARG00000006849	16.035	-1.19617	0.487053	-2.45594	0.0140515	0.0934943	asic2
ENSDARG00000006859	776.488	-0.438062	0.112301	-3.9008	9.58756e-05	0.00196764	nkain1
ENSDARG00000006862	113.291	0.530407	0.224601	2.36156	0.0181984	0.112225	kifap3b
ENSDARG00000006863	11.5079	0.172267	0.648479	0.265647	0.790511	0.921405	si:ch1073-349o24.2
ENSDARG00000006865	5.5127	-0.765601	0.746422	-1.02569	0.305036	0.618122	glra4a
ENSDARG00000006868	4.68826	0.48741	0.861897	0.565509	0.571727	0.815285	trh
ENSDARG00000006869	41.4734	-0.31513	0.299053	-1.05376	0.291994	0.603821	stx17
ENSDARG00000006877	142.579	0.304151	0.328155	0.926852	0.354003	0.664356	enpp4
ENSDARG00000006878	1632.21	-0.0664775	0.142795	-0.465544	0.641542	0.853396	phf21aa
ENSDARG00000006889	69.7138	-0.803875	0.267795	-3.00183	0.00268362	0.0279094	mpped2a
ENSDARG00000006891	8.74022	0.0154818	0.716393	0.0216107	0.982758	0.993779	kcns3a
ENSDARG00000006892	11.1907	-0.0252404	0.769804	-0.0327881	0.973844	0.98987	myo3b
ENSDARG00000006894	0.316786	-0.683233	3.69435	-0.18494	0.853276	NA	oprk1
ENSDARG00000006896	0.803838	2.52016	2.17005	1.16134	0.245505	NA	lhx6
ENSDARG00000006899	413.858	-0.12459	0.153358	-0.81241	0.416556	0.709373	far1
ENSDARG00000006900	890.828	0.014645	0.193432	0.0757116	0.939649	0.97849	impdh2
ENSDARG00000006901	5.02345	0.041413	0.913993	0.0453099	0.96386	0.986696	si:ch1073-459j12.1
ENSDARG00000006911	1179.85	0.0148738	0.240773	0.0617753	0.950742	0.982155	wnt8b
ENSDARG00000006915	240.701	-0.12861	0.162121	-0.793297	0.427605	0.717803	arl8ba
ENSDARG00000006921	3064	-0.194039	0.236368	-0.820921	0.411691	0.706787	lrp5
ENSDARG00000006923	9.82794	0.239137	0.682536	0.350365	0.726064	0.893087	cacna1ab
ENSDARG00000006924	1571.44	0.152662	0.109224	1.39769	0.162206	0.446362	fbxo38
ENSDARG00000006939	1794.44	-0.301102	0.148785	-2.02373	0.0429978	0.200438	tbx16l
ENSDARG00000006944	0.210073	0.278557	4.08052	0.0682649	0.945575	NA	NA
ENSDARG00000006963	2407.05	0.261027	0.113459	2.30064	0.0214122	0.125919	cse1l
ENSDARG00000006978	125.503	1.40472	0.2826	4.97071	6.67084e-07	2.6782e-05	zak
ENSDARG00000006981	4.17877	0.473434	0.833994	0.567671	0.570259	0.814372	ccdc113
ENSDARG00000006983	20.7239	-1.91107	0.558024	-3.4247	0.000615469	0.00888921	celf3b
ENSDARG00000006990	43.4358	-0.582983	0.314376	-1.85441	0.0636805	0.255378	creld1b
ENSDARG00000007009	0.329866	-0.686057	3.60968	-0.19006	0.849262	NA	hoxa11b
ENSDARG00000007024	2590.51	0.215944	0.296769	0.727652	0.466827	0.746884	uox
ENSDARG00000007025	97.133	-0.439728	0.219409	-2.00415	0.0450545	0.206725	ttc9c
ENSDARG00000007034	2768.82	-0.678923	0.174955	-3.88056	0.000104218	0.00210743	hnrpkl
ENSDARG00000007040	69.0835	0.465192	0.253432	1.83557	0.0664217	0.262297	tmigd1
ENSDARG00000007045	492.975	0.102532	0.333353	0.307579	0.758403	0.908912	cnot4a
ENSDARG00000007065	374.661	0.146359	0.140819	1.03934	0.298646	0.611086	mrps18b
ENSDARG00000007077	1668.42	0.266399	0.306547	0.869033	0.384829	0.68769	ankrd50l
ENSDARG00000007080	2.92034	2.26234	1.52221	1.48622	0.137221	NA	rhcgl1
ENSDARG00000007081	5868.17	-0.129818	0.102503	-1.26649	0.205338	0.506213	pias4a
ENSDARG00000007086	20.3897	0.959061	0.593736	1.6153	0.106246	0.349755	NA
ENSDARG00000007092	3059.69	0.332011	0.129516	2.56348	0.0103629	0.0753883	xab2
ENSDARG00000007097	3.35777	0.0844967	1.05467	0.0801164	0.936145	0.976955	her13
ENSDARG00000007098	6113.51	-0.0240705	0.115797	-0.207868	0.835332	0.939645	itm2ba
ENSDARG00000007099	55912.5	-0.0969661	0.0971799	-0.9978	0.318376	0.631517	cx43.4
ENSDARG00000007108	390.168	0.122714	0.165665	0.740733	0.458855	0.742324	lipia
ENSDARG00000007125	617.725	-0.140675	0.124909	-1.12622	0.260073	0.570897	asb6
ENSDARG00000007127	522.968	0.567748	0.112678	5.03869	4.6872e-07	1.94564e-05	acat2
ENSDARG00000007129	29.0728	0.615757	0.366871	1.6784	0.0932685	0.323691	slc6a16a
ENSDARG00000007130	2863.9	0.134672	0.0971024	1.38691	0.16547	0.45154	mrto4
ENSDARG00000007135	4328.32	-0.0247999	0.103351	-0.239957	0.810363	0.928891	cnot3a
ENSDARG00000007136	1098.46	-0.664088	0.129324	-5.13506	2.8205e-07	1.24328e-05	gtf2h4
ENSDARG00000007141	4320.87	0.207928	0.0997247	2.08502	0.0370671	0.18255	psmc3
ENSDARG00000007149	44.6723	-0.286012	0.336553	-0.849829	0.39542	0.694454	l1cama
ENSDARG00000007151	1.79138	-1.4636	1.37441	-1.06489	0.286924	NA	kcnk2b
ENSDARG00000007169	59.2855	-0.872614	0.277441	-3.14523	0.00165957	0.0190594	itgb1bp1
ENSDARG00000007171	2.98039	-1.32591	1.13514	-1.16806	0.242781	NA	aig1
ENSDARG00000007172	4817.18	-0.306604	0.146353	-2.09496	0.0361741	0.179946	plxna3
ENSDARG00000007175	764.045	0.00508962	0.109543	0.0464622	0.962942	0.986489	recql
ENSDARG00000007179	4231.63	-0.136129	0.12201	-1.11571	0.264545	0.574951	sash1a
ENSDARG00000007180	246.719	-0.0187084	0.16927	-0.110524	0.911994	0.967055	slc30a4
ENSDARG00000007181	113.499	0.00513709	0.252223	0.0203672	0.98375	0.994042	nadk2
ENSDARG00000007184	348.963	-0.317967	0.236048	-1.34705	0.177966	0.468649	zbtb16a
ENSDARG00000007186	102.581	0.179774	0.233816	0.768869	0.441971	0.729093	ppp1r8a
ENSDARG00000007195	1.22209	-0.414387	2.07368	-0.199832	0.841612	NA	grm2b
ENSDARG00000007196	2206.73	0.235769	0.102892	2.29142	0.0219389	0.128117	rae1
ENSDARG00000007198	2181.77	-0.0910143	0.109257	-0.83303	0.404828	0.701046	mta1
ENSDARG00000007199	0.0875994	-0.683232	4.08052	-0.167437	0.867026	NA	CR846090.1
ENSDARG00000007207	165.217	-0.072714	0.202806	-0.35854	0.719939	0.890217	cnpy2
ENSDARG00000007216	14950	0.0250644	0.0910772	0.2752	0.783163	0.91949	abce1
ENSDARG00000007217	1857.31	0.171689	0.0929378	1.84735	0.0646958	0.257594	wdr55
ENSDARG00000007219	79.1699	-0.510543	0.27373	-1.86514	0.0621623	0.25193	actn1
ENSDARG00000007220	81.4675	-0.2024	0.443383	-0.45649	0.648037	0.85619	ncam1b
ENSDARG00000007221	2479.71	-0.0981879	0.113743	-0.863241	0.388005	0.69031	pbk
ENSDARG00000007231	2531.15	0.0398719	0.100676	0.39604	0.692075	0.877301	ryk
ENSDARG00000007241	123.048	-0.119547	0.306903	-0.389527	0.696887	0.879744	mycb
ENSDARG00000007244	363.5	0.229899	0.214423	1.07218	0.283641	0.595837	acp2
ENSDARG00000007245	21.6052	0.0160015	0.470365	0.0340193	0.972862	0.989822	rundc3aa
ENSDARG00000007247	22.519	0.228104	0.446231	0.511179	0.609225	0.836388	ric8a
ENSDARG00000007250	430.165	0.209591	0.205941	1.01772	0.308811	0.621478	use1
ENSDARG00000007257	613.671	0.0708001	0.132057	0.536131	0.591868	0.826574	rab5ab
ENSDARG00000007264	179.605	-0.190245	0.206538	-0.921115	0.35699	0.666883	CABZ01056626.1
ENSDARG00000007271	3161.56	-0.0784877	0.111536	-0.703696	0.481622	0.75797	mynn
ENSDARG00000007275	1.04555	3.12118	2.37156	1.31609	0.188145	NA	si:ch211-251b21.1
ENSDARG00000007276	1.60393	-1.12072	1.55877	-0.718976	0.472156	NA	ela3l
ENSDARG00000007277	522.178	-0.174246	0.19575	-0.890146	0.373387	0.678735	NA
ENSDARG00000007278	1562.51	0.119133	0.129898	0.917123	0.359078	0.668529	ect2
ENSDARG00000007279	1199.81	0.291912	0.178263	1.63754	0.101518	0.340175	yipf5
ENSDARG00000007285	668.03	0.13862	0.130435	1.06275	0.287895	0.599823	mrpl57
ENSDARG00000007289	23.6882	-0.583503	0.520574	-1.12088	0.262338	0.573063	metrnlb
ENSDARG00000007294	7407.6	0.238285	0.083099	2.86749	0.00413747	0.0390668	aco2
ENSDARG00000007302	103.132	-0.243389	0.229706	-1.05956	0.289343	0.601005	sh3gl3b
ENSDARG00000007315	3071.59	-0.18243	0.109262	-1.66965	0.0949883	0.327522	tmpoa
ENSDARG00000007320	20144.9	0.0954168	0.153106	0.623208	0.533148	0.791853	rpl7
ENSDARG00000007323	1124.68	0.192985	0.169834	1.13631	0.255826	0.567386	chmp4bb
ENSDARG00000007329	11378	0.148098	0.209969	0.705331	0.480604	0.75742	tbx16
ENSDARG00000007344	0.435788	0	4.08052	0	1	NA	tcap
ENSDARG00000007347	3347.87	0.13139	0.124822	1.05261	0.292519	0.604129	degs1
ENSDARG00000007349	16.4778	-0.197107	0.464018	-0.424782	0.670996	0.866847	dmrt1
ENSDARG00000007356	2.5546	-0.789173	1.46733	-0.537828	0.590696	NA	fgf20a
ENSDARG00000007358	7.06029	0.558996	0.821395	0.680545	0.496159	0.76836	cxcr3.1
ENSDARG00000007359	243.356	-0.103394	0.149461	-0.69178	0.489075	0.763893	zgc:56596
ENSDARG00000007362	64.9542	0.216304	0.386763	0.559267	0.575979	0.817111	sft2d1
ENSDARG00000007366	1.3453	-2.78371	2.02037	-1.37782	0.168259	NA	AMDHD1
ENSDARG00000007369	1892.86	0.0159921	0.236205	0.0677044	0.946021	0.980676	tcf7l1b
ENSDARG00000007370	107.256	-0.31733	0.27639	-1.14813	0.250916	0.562299	dysf
ENSDARG00000007371	21.8101	-0.0879609	0.480963	-0.182885	0.854888	0.948339	slc26a3.1
ENSDARG00000007377	11755.8	0.190846	0.145849	1.30852	0.190697	0.485908	odc1
ENSDARG00000007382	127.95	-0.0479367	0.324382	-0.147778	0.882518	0.958329	ubtd1a
ENSDARG00000007383	17756.7	0.0787012	0.144428	0.544915	0.585812	0.823253	kcnk6
ENSDARG00000007385	10863.9	0.113766	0.103106	1.1034	0.269854	0.581001	cct7
ENSDARG00000007387	2414.51	-0.214837	0.107565	-1.99729	0.0457942	0.208678	irf2a
ENSDARG00000007396	2.13923	0.142261	1.18163	0.120394	0.904171	NA	rnd3b
ENSDARG00000007398	1119.67	-0.40626	0.276873	-1.46732	0.14229	0.414023	lrrk1
ENSDARG00000007405	3260.25	0.0857823	0.101933	0.841555	0.400037	0.697405	strap
ENSDARG00000007406	51.77	0.206687	0.357209	0.578618	0.562847	0.810262	phox2a
ENSDARG00000007407	1.37771	-1.29856	1.57254	-0.825773	0.408933	NA	barx1
ENSDARG00000007409	9.91812	0.44713	0.674444	0.662961	0.507356	0.774871	ppifa
ENSDARG00000007412	15.7338	0.530549	0.455506	1.16475	0.244122	0.554033	slc2a1b
ENSDARG00000007413	2598.23	-0.378951	0.629799	-0.601701	0.547373	0.799911	arid2
ENSDARG00000007418	213.09	-0.354626	0.160431	-2.21046	0.0270733	0.148176	chmp4c
ENSDARG00000007421	0.6492	1.16051	2.7374	0.423945	0.671606	NA	ftcd
ENSDARG00000007425	0.218677	1.24035	4.08052	0.303967	0.761153	NA	apol1
ENSDARG00000007429	502.401	0.511974	0.145074	3.52907	0.000417024	0.00647059	ndor1
ENSDARG00000007430	52.7931	0.798532	0.377426	2.11573	0.0343678	0.174198	prdm12b
ENSDARG00000007436	0.729223	-1.95679	2.21531	-0.883302	0.377073	NA	avpr2aa
ENSDARG00000007438	4508.22	0.0647748	0.117775	0.549988	0.582328	0.821313	ube2ib
ENSDARG00000007443	453.454	-0.114992	0.115235	-0.997888	0.318334	0.631517	fbxl18
ENSDARG00000007444	531.916	0.0191116	0.159307	0.119968	0.904509	0.965337	ift81
ENSDARG00000007449	1892.08	0.0120083	0.104216	0.115226	0.908266	0.966165	slc25a39
ENSDARG00000007461	683.624	0.0837097	0.100726	0.831063	0.405938	0.702356	srgap1a
ENSDARG00000007465	91.8152	-0.426145	0.206473	-2.06392	0.0390248	0.188767	tdrd1
ENSDARG00000007467	0.12024	0	4.08052	0	1	NA	ifit10
ENSDARG00000007477	85.1965	0.0281375	0.242929	0.115826	0.907791	0.966021	fbxo8
ENSDARG00000007480	3.1476	-1.47387	1.20046	-1.22776	0.219538	0.525276	rpe65a
ENSDARG00000007485	1567.39	-0.228779	0.105065	-2.1775	0.0294434	0.156836	epc2
ENSDARG00000007490	10.2217	-1.09072	0.628236	-1.73617	0.0825341	0.300128	adrb1
ENSDARG00000007494	1117.62	0.250027	0.14325	1.74539	0.080917	0.296372	st3gal8
ENSDARG00000007496	675.882	0.692616	0.131649	5.26108	1.43211e-07	6.81435e-06	ufl1
ENSDARG00000007523	1210.66	-0.313539	0.538598	-0.58214	0.560473	0.808388	kmt2e
ENSDARG00000007526	1915.9	0.206148	0.13498	1.52725	0.126698	0.388791	ndufs2
ENSDARG00000007531	573.95	-0.0188363	0.162775	-0.11572	0.907874	0.966021	zcchc9
ENSDARG00000007534	1.19509	-1.84739	1.96259	-0.941303	0.34655	NA	itln1
ENSDARG00000007553	4.4346	0.541761	0.935975	0.57882	0.56271	0.810221	opn4.1
ENSDARG00000007560	3.66304	0.300653	0.915484	0.328408	0.742603	0.901859	sema3bl
ENSDARG00000007561	59.0074	-0.553153	0.308987	-1.79021	0.0734196	0.279674	cdh23
ENSDARG00000007566	2295.26	0.0629475	0.0967153	0.650854	0.515141	0.779833	appbp2
ENSDARG00000007576	1.80524	0.280487	1.78495	0.157139	0.875135	NA	crybb1l1
ENSDARG00000007582	338.61	-0.00112174	0.236348	-0.00474611	0.996213	0.998843	si:ch1073-155h21.1
ENSDARG00000007597	178.21	0.0446642	0.206639	0.216146	0.828874	0.936791	bloc1s4
ENSDARG00000007601	162.531	-0.756258	0.217309	-3.4801	0.000501223	0.00749877	zmynd8
ENSDARG00000007603	300.221	0.183484	0.176655	1.03866	0.298965	0.611471	stxbp2
ENSDARG00000007614	45.4483	0.233852	0.333912	0.70034	0.483715	0.759651	wwox
ENSDARG00000007624	224.284	0.212777	0.22205	0.958239	0.337942	0.650037	gins1
ENSDARG00000007630	286.848	-0.0788149	0.146323	-0.538636	0.590138	0.825568	mkrn2
ENSDARG00000007639	453.431	-0.0240354	0.210704	-0.114072	0.909181	0.966418	cnot4b
ENSDARG00000007654	2.03452	-0.860276	1.40104	-0.614026	0.539198	NA	nsfa
ENSDARG00000007657	517.95	0.0753694	0.113362	0.664858	0.506141	0.774207	ccnh
ENSDARG00000007663	0.313827	-1.5628	3.65812	-0.427215	0.669222	NA	amph
ENSDARG00000007671	40.459	-1.10428	0.345134	-3.19956	0.00137637	0.0165775	ghrb
ENSDARG00000007678	358.751	-1.35389	0.157918	-8.57334	1.00522e-17	2.51579e-15	ttyh3b
ENSDARG00000007682	51.3539	-0.258089	0.302771	-0.852422	0.39398	0.693834	ppdpfa
ENSDARG00000007691	1176.57	0.232316	0.155479	1.49419	0.135125	0.401728	cul1b
ENSDARG00000007693	432.171	-0.147525	0.135884	-1.08567	0.277624	0.589348	nfkbiab
ENSDARG00000007697	10.2483	0.420586	0.701334	0.599695	0.54871	0.80057	fabp7a
ENSDARG00000007708	4831.4	-0.0444829	0.0906607	-0.490653	0.623672	0.843836	nsa2
ENSDARG00000007709	13.0004	-0.211812	0.522343	-0.405504	0.685107	0.873599	adamts8a
ENSDARG00000007711	47.6259	-1.47684	0.5229	-2.82432	0.00473812	0.0433563	rab3il1
ENSDARG00000007715	40.3811	1.02521	0.430059	2.38389	0.0171307	0.107467	lgsn
ENSDARG00000007720	289.775	-0.131764	0.145361	-0.906459	0.364693	0.672214	sub1b
ENSDARG00000007722	161.102	-0.0429895	0.191071	-0.224992	0.821985	0.933225	nudt8
ENSDARG00000007723	544.703	0.443897	0.12533	3.54184	0.000397352	0.00624581	efnb1
ENSDARG00000007727	44.0781	0.757884	0.402775	1.88165	0.0598829	0.245994	rgl2
ENSDARG00000007734	108.79	-0.252854	0.225857	-1.11953	0.262912	0.573449	stn1
ENSDARG00000007737	658.162	0.0458544	0.137795	0.332772	0.739307	0.90011	zyg11
ENSDARG00000007739	3.39728	0.300022	1.09962	0.272841	0.784975	0.91987	atp1a1a.2
ENSDARG00000007743	78.4404	1.16529	0.2882	4.04335	5.26928e-05	0.00120029	il15l
ENSDARG00000007744	6639.54	-0.087499	0.0902088	-0.96996	0.332066	0.644603	tsr1
ENSDARG00000007745	683.852	0.109211	0.111495	0.979516	0.327325	0.640589	uqcrfs1
ENSDARG00000007751	108.247	0.903929	0.207789	4.35023	1.35993e-05	0.000384271	lmnl3
ENSDARG00000007753	2.12303	2.56374	1.54266	1.66189	0.0965347	NA	cpne2
ENSDARG00000007755	566.4	-0.186053	0.114213	-1.629	0.103313	0.344334	wdr61
ENSDARG00000007760	231.487	-0.316634	0.150649	-2.1018	0.0355712	0.177957	spg21
ENSDARG00000007764	472.227	0.0181002	0.136358	0.13274	0.894399	0.963226	klhdc10
ENSDARG00000007769	10.9511	0.745088	0.697576	1.06811	0.285471	0.597903	NA
ENSDARG00000007774	1029.2	-0.414796	0.143154	-2.89755	0.00376087	0.0363146	vash2
ENSDARG00000007783	1.05668	-0.113933	1.74974	-0.0651146	0.948083	NA	blk
ENSDARG00000007786	1513.32	-0.329858	0.118347	-2.7872	0.00531651	0.0471869	tmx2b
ENSDARG00000007787	24.0974	-0.796854	0.507281	-1.57083	0.116222	0.369223	zgc:112965
ENSDARG00000007788	53.9588	0.43768	0.292108	1.49835	0.134042	0.400101	atp2b1b
ENSDARG00000007791	6918.57	0.10438	0.0803486	1.2991	0.193911	0.490402	ppp2r1ba
ENSDARG00000007795	12397.5	0.00413783	0.192732	0.0214693	0.982871	0.993779	cst3
ENSDARG00000007804	138.684	-0.544106	0.197716	-2.75196	0.00592399	0.0509421	gas6
ENSDARG00000007807	4.42095	-1.6551	1.15828	-1.42893	0.153024	0.431445	cyth3a
ENSDARG00000007808	589.012	0.199266	0.166788	1.19472	0.232195	0.539698	zdhhc16a
ENSDARG00000007812	3212.32	-0.000982717	0.102864	-0.00955354	0.992377	0.99771	sp3b
ENSDARG00000007813	246.295	-0.153165	0.209621	-0.730675	0.464978	0.745721	rnpepl1
ENSDARG00000007818	989.306	0.344538	0.204036	1.68861	0.0912935	0.319122	palm1b
ENSDARG00000007823	33.8991	0.575356	0.36893	1.55953	0.118872	0.374678	atf3
ENSDARG00000007824	28.5613	-0.59443	0.432511	-1.37437	0.169327	0.45704	camta1b
ENSDARG00000007825	30.8052	0.313164	0.386391	0.810486	0.417661	0.710142	map2k1
ENSDARG00000007836	50592.2	0.195304	0.172887	1.12967	0.258617	0.569904	ctsla
ENSDARG00000007842	1.30447	-0.722902	1.4959	-0.483256	0.628914	NA	MCHR2
ENSDARG00000007856	0.12024	0	4.08052	0	1	NA	NA
ENSDARG00000007863	7211.94	0.0921409	0.103312	0.891873	0.372461	0.678549	tra2a
ENSDARG00000007864	2.16963	-1.09369	1.25661	-0.870344	0.384112	NA	pimr195
ENSDARG00000007867	586.347	0.035632	0.141854	0.251187	0.801669	0.925254	dazap2
ENSDARG00000007869	209.236	-0.0540955	0.186567	-0.289952	0.771853	0.914178	ehd3
ENSDARG00000007885	82.6878	-0.306375	0.265784	-1.15272	0.249024	0.559838	fancl
ENSDARG00000007886	595.492	0.158071	0.105268	1.50161	0.133198	0.398499	slc35b2
ENSDARG00000007891	225.062	0.23486	0.351791	0.667612	0.504381	0.773338	meox1
ENSDARG00000007892	380.515	0.393536	0.153017	2.57184	0.010116	0.0741518	pdcd2
ENSDARG00000007901	2925.77	-0.0174365	0.0962528	-0.181153	0.856248	0.949022	crnkl1
ENSDARG00000007906	16.3063	0.5505	0.503009	1.09441	0.273774	0.5853	lrp2b
ENSDARG00000007912	10.4667	-0.192561	0.554823	-0.347068	0.72854	0.894761	si:ch211-196i2.1
ENSDARG00000007916	787.542	0.173512	0.0968802	1.79099	0.0732945	0.279308	xpnpep3
ENSDARG00000007918	519.57	0.229863	0.139276	1.65042	0.0988575	0.335816	ttc27
ENSDARG00000007923	1664.9	-0.0458941	0.103916	-0.441647	0.658745	0.861317	ptpn1
ENSDARG00000007941	0.865315	-1.65813	2.55633	-0.648636	0.516574	NA	hmx4
ENSDARG00000007943	3967.34	-0.169407	0.0924651	-1.83211	0.0669343	0.263136	gabpb2a
ENSDARG00000007944	19.4085	0.510567	0.446392	1.14377	0.252721	0.564398	lhx1b
ENSDARG00000007950	1.38828	-1.04559	1.81213	-0.576997	0.563941	NA	itga11b
ENSDARG00000007955	1771.29	-0.198949	0.135741	-1.46566	0.142742	0.414705	iars
ENSDARG00000007959	318.887	0.272723	0.160077	1.7037	0.0884377	0.313	hibadhb
ENSDARG00000007960	20475.4	-0.255397	0.173103	-1.4754	0.140104	0.410577	hnrnpaba
ENSDARG00000007971	585.658	0.00365929	0.141137	0.0259272	0.979315	0.992604	cks1b
ENSDARG00000007975	35.8614	-0.642364	0.405887	-1.58262	0.113509	0.36445	fth1b
ENSDARG00000007976	1731.59	-0.290869	0.210439	-1.3822	0.16691	0.45316	si:ch211-220f16.2
ENSDARG00000007982	383.017	-0.205965	0.336961	-0.611242	0.541039	0.797001	onecut1
ENSDARG00000007988	30.4416	0.366386	0.360693	1.01578	0.309733	0.62247	NA
ENSDARG00000007989	422.064	-0.139783	0.155717	-0.897675	0.369359	0.676862	nedd8
ENSDARG00000007990	2.1701	-0.261004	1.17845	-0.22148	0.824718	NA	wt1b
ENSDARG00000007996	2667.79	-0.3274	0.238293	-1.37394	0.16946	0.457248	pou2f1b
ENSDARG00000008010	9.1674	-0.504964	0.592024	-0.852946	0.393689	0.693722	zgc:194189
ENSDARG00000008014	121.321	0.833713	0.249191	3.34568	0.000820813	0.0110076	nudt17
ENSDARG00000008019	8.47715	-1.58806	0.784806	-2.0235	0.0430215	0.2005	mxg
ENSDARG00000008020	652.047	-0.053829	0.105835	-0.508611	0.611025	0.837255	med31
ENSDARG00000008022	2787.48	0.0372773	0.116344	0.320407	0.74866	0.904625	kif18a
ENSDARG00000008026	70.1877	-0.132422	0.259562	-0.510175	0.609929	0.836593	fam129bb
ENSDARG00000008029	0.91741	3.66726	2.67499	1.37094	0.170392	NA	mep1a.2
ENSDARG00000008030	175.511	1.09195	0.309109	3.53255	0.000411566	0.00643457	myl9b
ENSDARG00000008032	4956.46	0.0193851	0.0848763	0.228392	0.819342	0.931976	sart3
ENSDARG00000008034	514.238	-0.241228	0.13983	-1.72516	0.0844993	0.304108	skib
ENSDARG00000008049	1655.03	-0.013262	0.0904884	-0.14656	0.883479	0.958762	si:dkey-42i9.4
ENSDARG00000008060	7.12488	-0.146704	0.708975	-0.206925	0.836069	0.939645	scara3
ENSDARG00000008068	1315.07	0.164711	0.106333	1.549	0.121381	0.378701	tma16
ENSDARG00000008075	3.25776	0.166918	1.00954	0.165341	0.868675	0.953009	illr4
ENSDARG00000008095	0.108947	0	4.08052	0	1	NA	NA
ENSDARG00000008097	2372.86	-0.112801	0.103251	-1.0925	0.274614	0.585926	srsf9
ENSDARG00000008098	21.2028	0.304565	0.454926	0.669481	0.503189	0.772419	ifit9
ENSDARG00000008100	18.7463	0.0969718	0.431584	0.224688	0.822222	0.933225	slc7a10a
ENSDARG00000008105	1205.57	0.0392561	0.121793	0.322317	0.747213	0.904011	mettl2a
ENSDARG00000008107	52.7825	-0.112787	0.344687	-0.327215	0.743506	0.902257	src
ENSDARG00000008119	965.972	0.214312	0.10535	2.03428	0.0419231	0.197112	si:ch211-195d17.2
ENSDARG00000008127	35.6914	-0.310437	0.326104	-0.951956	0.34112	0.653581	pcdh15b
ENSDARG00000008131	77.7246	0.959229	0.533479	1.79806	0.0721672	0.276268	sox1b
ENSDARG00000008133	14.4914	-0.760932	0.548151	-1.38818	0.165082	0.450929	foxl1
ENSDARG00000008140	3.83024	-4.72694	2.05407	-2.30125	0.0213773	0.12576	kcnab1a
ENSDARG00000008141	3668.1	-0.0716337	0.120622	-0.59387	0.552599	0.803016	rbl1
ENSDARG00000008142	449.119	0.281496	0.192916	1.45916	0.144521	0.418118	stxbp3
ENSDARG00000008153	8063.59	-0.220348	0.133499	-1.65055	0.0988296	0.335799	serinc5
ENSDARG00000008155	515.049	-0.0690354	0.20462	-0.337383	0.735828	0.898615	sms
ENSDARG00000008164	2.39336	0.302096	1.35482	0.222978	0.823552	NA	NA
ENSDARG00000008165	2.77653	-1.2835	1.11857	-1.14745	0.251194	NA	caspa
ENSDARG00000008170	433.377	-0.463226	0.264916	-1.74857	0.0803646	0.295236	dbnla
ENSDARG00000008174	49.8916	-0.924855	0.573569	-1.61246	0.106863	0.350946	hoxb1a
ENSDARG00000008184	6497	-0.090942	0.181854	-0.500082	0.617018	0.840575	mia3
ENSDARG00000008186	26.9004	-0.885799	0.602754	-1.46959	0.141674	0.412974	syk
ENSDARG00000008188	5930.93	-0.122265	0.302691	-0.403926	0.686267	0.874284	sf1
ENSDARG00000008191	17.8837	-1.14449	0.510324	-2.24268	0.0249176	0.140037	tmeff1a
ENSDARG00000008192	315.027	-0.0100305	0.202222	-0.0496012	0.96044	0.985516	pank1a
ENSDARG00000008200	398.13	0.205892	0.223258	0.922215	0.356416	0.666266	ugp2b
ENSDARG00000008203	0.335175	-0.683233	3.63016	-0.18821	0.850712	NA	pax1a
ENSDARG00000008209	4.51064	0.988238	0.983992	1.00432	0.315226	0.628699	myt1la
ENSDARG00000008212	0.985674	-1.20339	2.05518	-0.58554	0.558185	NA	kcnk13a
ENSDARG00000008218	399.049	0.00864894	0.140711	0.0614662	0.950988	0.982195	znf410
ENSDARG00000008219	0.372532	2.77861	3.99133	0.69616	0.486329	NA	crygm4
ENSDARG00000008224	2338.59	-0.0721136	0.103368	-0.69764	0.485402	0.760812	vps35
ENSDARG00000008235	1300.98	0.211725	0.162316	1.3044	0.192098	0.48766	cog5
ENSDARG00000008237	2539.54	0.294333	0.084158	3.49739	0.00046984	0.00712374	sars
ENSDARG00000008238	604.598	-0.124996	0.108963	-1.14714	0.251323	0.56271	manba
ENSDARG00000008239	68.8265	-0.23384	0.320566	-0.729462	0.465719	0.745913	mocs3
ENSDARG00000008243	7421.04	0.206773	0.0836444	2.47205	0.0134342	0.0903316	cct8
ENSDARG00000008247	473.95	-0.186234	0.213267	-0.873243	0.38253	0.686318	vezf1a
ENSDARG00000008249	13.7218	0.0600067	0.60933	0.0984799	0.921551	0.971404	ptchd4
ENSDARG00000008255	10322.1	-0.0710004	0.13784	-0.515093	0.606488	0.834533	cnot6a
ENSDARG00000008263	117.906	-0.778159	0.853297	-0.911944	0.361798	0.670638	mfsd4ab
ENSDARG00000008275	2071.57	-1.36061	0.239824	-5.67338	1.40005e-08	8.35306e-07	klhl24b
ENSDARG00000008278	3723.85	-0.203724	0.0987634	-2.06274	0.0391369	0.189119	rcor2
ENSDARG00000008279	495.048	-0.0539911	0.164086	-0.32904	0.742125	0.901649	map2k7
ENSDARG00000008287	196.576	-0.208048	0.22708	-0.916191	0.359567	0.668972	fam114a1
ENSDARG00000008292	10832.7	0.135361	0.0975888	1.38705	0.165425	0.451482	eif2s3
ENSDARG00000008305	14.3616	-0.396224	0.812372	-0.487737	0.625736	0.844653	hand2
ENSDARG00000008306	0.686272	0.278558	2.72213	0.102331	0.918494	NA	rdh5
ENSDARG00000008310	494.894	0.0953917	0.129969	0.73396	0.462973	0.744443	ip6k2a
ENSDARG00000008322	480.616	-0.0150932	0.155738	-0.096914	0.922795	0.971971	ambra1a
ENSDARG00000008329	7.21269	-0.295883	0.789165	-0.374932	0.707711	0.885377	asic1a
ENSDARG00000008333	1109.96	-0.574619	0.262849	-2.18612	0.0288071	0.154765	znfl2a
ENSDARG00000008363	2618.36	0.632746	0.146957	4.30564	1.66505e-05	0.000454492	mcl1b
ENSDARG00000008370	4175.91	-0.0218899	0.105935	-0.206636	0.836295	0.939667	csnk1da
ENSDARG00000008372	749.226	-0.213775	0.158965	-1.3448	0.178691	0.469555	spred2b
ENSDARG00000008377	2892.58	-0.158172	0.135822	-1.16456	0.244198	0.554033	epn2
ENSDARG00000008380	4991.64	0.0104915	0.0935297	0.112173	0.910687	0.966819	brd7
ENSDARG00000008383	2979.6	0.0993033	0.129893	0.764502	0.444568	0.730851	arpc1a
ENSDARG00000008384	737.343	-0.0606877	0.159329	-0.380894	0.703282	0.883388	hdac6
ENSDARG00000008388	158.962	-0.678647	0.206422	-3.28766	0.00101022	0.0129441	mmp14b
ENSDARG00000008395	841.547	-0.205286	0.101713	-2.0183	0.0435604	0.202473	snupn
ENSDARG00000008396	469.001	0.0666475	0.16621	0.400984	0.688432	0.875347	ftr24
ENSDARG00000008398	4.04035	-1.67001	1.10477	-1.51163	0.130629	0.394692	cacna1c
ENSDARG00000008403	34.5461	-0.355441	0.360102	-0.987057	0.323615	0.637413	phospho1
ENSDARG00000008407	198.752	-0.288628	0.244299	-1.18146	0.237422	0.545899	tspan7b
ENSDARG00000008413	889.358	0.15268	0.191491	0.797323	0.425263	0.715868	atp11a
ENSDARG00000008414	1.16169	-0.693781	1.61419	-0.429802	0.66734	NA	exoc3l2a
ENSDARG00000008433	2181.61	0.0310181	0.219194	0.14151	0.887467	0.960424	unc45b
ENSDARG00000008434	1724.5	-0.028035	0.108851	-0.257553	0.796752	0.923661	bcl2l1
ENSDARG00000008439	86.6027	0.122644	0.279995	0.438022	0.661371	0.862216	atxn10
ENSDARG00000008447	2008.36	-0.225175	0.161604	-1.39338	0.163506	0.448338	fkbp4
ENSDARG00000008450	34.5258	-0.442303	0.393259	-1.12471	0.260712	0.571578	pcolce2a
ENSDARG00000008454	285.769	0.0726386	0.210821	0.344552	0.730431	0.89597	cpeb1b
ENSDARG00000008457	6.74054	-0.11622	0.680054	-0.170898	0.864304	0.950957	faah2a
ENSDARG00000008461	832.904	-0.324631	0.196912	-1.64861	0.0992283	0.336482	anapc5
ENSDARG00000008472	115.028	0.381224	0.213528	1.78536	0.0742026	0.281638	apex2
ENSDARG00000008473	2.73241	1.489	1.30254	1.14315	0.252975	NA	asb14a
ENSDARG00000008480	1242.88	-0.591878	0.139605	-4.23967	2.23845e-05	0.000582936	trmt61a
ENSDARG00000008485	187.083	0.378244	0.192459	1.96532	0.049377	0.218344	lrp3
ENSDARG00000008487	3319.11	0.0811293	0.101812	0.796851	0.425537	0.715953	dmd
ENSDARG00000008490	1519.75	0.155042	0.105469	1.47002	0.141556	0.412807	ltv1
ENSDARG00000008491	9.92443	1.31549	0.721948	1.82214	0.0684333	0.266676	si:ch211-107o10.3
ENSDARG00000008494	2017.37	0.349466	0.132617	2.63515	0.00841002	0.0651143	myl6
ENSDARG00000008502	2761.52	0.0245423	0.0912523	0.26895	0.787969	0.920858	pno1
ENSDARG00000008503	4.76612	-0.660526	0.75722	-0.872304	0.383043	0.68668	glcci1a
ENSDARG00000008540	22.3355	-0.939389	0.587493	-1.59898	0.109825	0.356664	sox21b
ENSDARG00000008541	113.956	0.483925	0.245358	1.97232	0.0485727	0.216277	chia.4
ENSDARG00000008542	3747.56	-0.162555	0.108662	-1.49597	0.134662	0.400968	yod1
ENSDARG00000008548	784.588	-0.0276298	0.142972	-0.193254	0.84676	0.944833	arhgap12a
ENSDARG00000008551	1086.8	-0.0883029	0.132723	-0.665315	0.505849	0.774036	pole3
ENSDARG00000008553	3.40351	-0.664213	1.15896	-0.57311	0.56657	0.812863	zgc:136872
ENSDARG00000008560	238.659	-0.190937	0.225706	-0.845953	0.397579	0.695711	brap
ENSDARG00000008568	404.686	-0.853183	0.183047	-4.661	3.1467e-06	0.000106949	slc25a24
ENSDARG00000008573	299.663	-0.250096	0.158889	-1.57402	0.115482	0.367965	fam20b
ENSDARG00000008575	396.079	0.120475	0.202802	0.594051	0.552478	0.803016	lyst
ENSDARG00000008592	354.118	0.0257818	0.229563	0.112309	0.910579	0.966819	mtmr8
ENSDARG00000008593	383.456	0.476753	0.17998	2.64893	0.00807482	0.0633273	nbas
ENSDARG00000008623	613.554	0.143416	0.124346	1.15337	0.24876	0.559562	cops3
ENSDARG00000008637	37600.3	-0.0463844	0.151943	-0.305275	0.760157	0.909931	mttp
ENSDARG00000008639	305.31	0.0843665	0.184288	0.457797	0.647098	0.856178	kifap3a
ENSDARG00000008660	171.876	-0.193521	0.283661	-0.682225	0.495097	0.767931	coro1b
ENSDARG00000008662	0.718823	-0.763081	2.19245	-0.348049	0.727803	NA	fign
ENSDARG00000008678	258.046	0.155799	0.15714	0.991463	0.321459	0.635173	snx3
ENSDARG00000008697	3758.43	0.198195	0.137913	1.4371	0.15069	0.42768	epas1a
ENSDARG00000008703	758.374	0.427303	0.174577	2.44765	0.014379	0.095059	apeh
ENSDARG00000008706	1608.31	0.174916	0.101058	1.73084	0.0834801	0.302125	paip2b
ENSDARG00000008720	140.992	0.230525	0.218619	1.05446	0.291672	0.603545	lmo3
ENSDARG00000008723	43.7682	-0.490085	0.410475	-1.19394	0.2325	0.539885	prkcba
ENSDARG00000008727	764.957	0.201405	0.211337	0.953004	0.340588	0.652822	ranbp3a
ENSDARG00000008732	1158.53	-0.0220194	0.247929	-0.0888133	0.92923	0.974333	zgc:66479
ENSDARG00000008735	768.514	0.26202	0.159023	1.64768	0.0994175	0.336759	atp6ap2
ENSDARG00000008740	3045.86	0.122164	0.130318	0.937432	0.348536	0.660112	esf1
ENSDARG00000008748	941.873	0.0767836	0.134871	0.569312	0.569144	0.814023	ube2na
ENSDARG00000008757	1259.56	-0.157126	0.104311	-1.50633	0.131983	0.396918	entpd6
ENSDARG00000008765	455.968	0.351623	0.131253	2.67896	0.00738507	0.0597126	tmed5
ENSDARG00000008767	377.339	0.119785	0.134099	0.893255	0.371721	0.678132	tle2b
ENSDARG00000008772	1.45357	3.03449	2.0653	1.46928	0.141758	NA	cacng1a
ENSDARG00000008784	5046.41	-0.0213204	0.155526	-0.137086	0.890963	0.961891	prpf4ba
ENSDARG00000008785	1133.87	0.261929	0.114272	2.29215	0.0218971	0.127963	dldh
ENSDARG00000008788	13.3208	0.251671	0.586162	0.429354	0.667666	0.865345	camk1gb
ENSDARG00000008790	3.45652	1.39462	1.05719	1.31917	0.187111	0.48116	actr3b
ENSDARG00000008796	86.1881	0.338528	0.273765	1.23656	0.216249	0.520981	her5
ENSDARG00000008803	3393.02	-0.201233	0.100292	-2.00646	0.0448068	0.206149	marcksb
ENSDARG00000008805	1455.41	-0.138991	0.156491	-0.888178	0.374445	0.679619	orc3
ENSDARG00000008807	37.8018	-0.151446	0.325886	-0.464722	0.642131	0.853708	bokb
ENSDARG00000008808	520.34	-0.0510731	0.212667	-0.240155	0.81021	0.928784	eml2
ENSDARG00000008811	15.5656	-1.32485	0.477753	-2.77309	0.00555265	0.0486608	cmtm3
ENSDARG00000008816	4469.24	0.121653	0.142182	0.855615	0.392211	0.692722	glud1a
ENSDARG00000008818	2064.67	0.0315941	0.182561	0.173061	0.862604	0.950776	hsf1
ENSDARG00000008829	28.3102	-0.165626	0.336651	-0.491983	0.622731	0.843155	chga
ENSDARG00000008832	876.016	0.0185987	0.209623	0.0887245	0.929301	0.974333	neu1
ENSDARG00000008835	641.505	2.0696	0.571358	3.62225	0.000292049	0.00491535	si:dkey-46g23.5
ENSDARG00000008840	284.04	0.206316	0.20001	1.03153	0.302294	0.614959	hmbsa
ENSDARG00000008849	4.44825	-0.82209	1.04629	-0.78572	0.432032	0.721651	ptprq
ENSDARG00000008852	81.7899	-0.876217	0.216905	-4.03963	5.35347e-05	0.00121516	elp4
ENSDARG00000008858	978.341	0.326025	0.186485	1.74827	0.0804179	0.295356	cyp7b1
ENSDARG00000008859	1140	-0.358941	0.136616	-2.62736	0.00860498	0.066208	mylipa
ENSDARG00000008861	3.8383	0.0761746	1.08026	0.0705153	0.943784	0.980202	tfap2e
ENSDARG00000008866	0.217894	0	4.08052	0	1	NA	cabp4
ENSDARG00000008867	1195.15	-0.396093	0.185691	-2.13308	0.0329185	0.169241	rap1b
ENSDARG00000008880	5.40479	-0.491739	0.879392	-0.559181	0.576038	0.817111	usp28
ENSDARG00000008884	480.683	-0.133654	0.171764	-0.778127	0.436494	0.724859	hprt1
ENSDARG00000008886	1086.61	0.181727	0.167851	1.08267	0.278957	0.59081	msx1b
ENSDARG00000008890	265.486	0.153387	0.170017	0.902188	0.366957	0.674774	ctns
ENSDARG00000008904	127.076	-0.186675	0.250512	-0.745174	0.456167	0.740469	smarca2
ENSDARG00000008906	139.13	0.186601	0.238756	0.781553	0.434477	0.723328	si:ch211-241e1.5
ENSDARG00000008912	11.9798	-0.172002	0.621093	-0.276935	0.78183	0.919202	slc8a2a
ENSDARG00000008920	30.0163	-0.280384	0.373531	-0.75063	0.452875	0.737761	mrpl53
ENSDARG00000008931	288.512	-0.326825	0.280705	-1.1643	0.244303	0.554166	renbp
ENSDARG00000008936	1590.6	0.262844	0.111262	2.36239	0.0181575	0.11208	sec11a
ENSDARG00000008946	2.3633	-0.44152	1.18616	-0.372225	0.709725	NA	ccdc127b
ENSDARG00000008947	8150.61	0.0892096	0.0797516	1.11859	0.263314	0.573449	rtf1
ENSDARG00000008948	0.217894	0	4.08052	0	1	NA	pla2g3
ENSDARG00000008953	812.823	-0.174846	0.14469	-1.20842	0.226886	0.533157	pofut1
ENSDARG00000008966	2854.85	0.171112	0.126267	1.35516	0.175366	0.465877	tbl1xr1b
ENSDARG00000008969	0.520711	-2.16637	2.42656	-0.892773	0.371979	NA	fgb
ENSDARG00000008976	11964.7	-0.0770259	0.136186	-0.565593	0.57167	0.81527	mdn1
ENSDARG00000008979	1190.18	-0.0707342	0.119016	-0.594326	0.552294	0.802961	golga1
ENSDARG00000008982	1.78065	-4.20452	1.7706	-2.37463	0.0175666	NA	casq2
ENSDARG00000008983	107.716	-0.517111	0.238826	-2.16523	0.0303704	0.160172	sh3glb2a
ENSDARG00000008986	2226.27	0.125122	0.123091	1.01651	0.309389	0.622222	e2f7
ENSDARG00000009001	1053.01	-0.326527	0.203894	-1.60145	0.109278	0.355604	pdia6
ENSDARG00000009014	124.323	0.119139	0.20477	0.581817	0.56069	0.808573	col11a1b
ENSDARG00000009018	521.866	-0.844816	0.228645	-3.69487	0.000219995	0.00389663	rhbg
ENSDARG00000009020	3.48106	-1.66423	1.02464	-1.62421	0.10433	0.346348	cnr1
ENSDARG00000009021	2.12661	-0.522242	1.39796	-0.373573	0.708722	NA	chrna1
ENSDARG00000009023	1660.51	-0.164207	0.101376	-1.61978	0.10528	0.347645	ankrd28b
ENSDARG00000009026	42.5461	0.202277	0.331381	0.610406	0.541593	0.797435	ank2a
ENSDARG00000009031	1101.03	0.261601	0.21134	1.23782	0.215781	0.520571	tnikb
ENSDARG00000009040	543.276	0.141281	0.20341	0.694564	0.487328	0.762231	si:ch73-141c7.1
ENSDARG00000009046	103.831	-0.138829	0.228895	-0.60652	0.544169	0.798711	nphp1
ENSDARG00000009074	55.9645	-0.350569	0.282159	-1.24245	0.21407	0.518389	cbr4
ENSDARG00000009079	1.50297	-0.252135	1.38133	-0.18253	0.855167	NA	BX296551.1
ENSDARG00000009087	0.774698	0.700541	1.86807	0.375009	0.707654	NA	NA
ENSDARG00000009094	0.525513	-1.44176	3.86294	-0.37323	0.708977	NA	gata2b
ENSDARG00000009106	1092.34	-0.0388417	0.117153	-0.331545	0.740233	0.900591	serinc1
ENSDARG00000009123	2.74792	2.07125	1.43782	1.44055	0.149712	NA	sele
ENSDARG00000009131	0.506905	-2.11155	2.74726	-0.768602	0.44213	NA	slc10a4
ENSDARG00000009133	3506.77	0.0981787	0.145904	0.672901	0.50101	0.771565	myo1eb
ENSDARG00000009134	8.0506	0.541123	0.82043	0.65956	0.509536	0.776482	hlx1
ENSDARG00000009136	1780.4	0.0971416	0.17875	0.54345	0.58682	0.823776	tp53bp2a
ENSDARG00000009142	792.572	-0.0865019	0.172093	-0.502645	0.615214	0.839705	ppp1r13bb
ENSDARG00000009160	2.77403	0.312792	1.2532	0.249596	0.8029	NA	kmo
ENSDARG00000009161	0.531494	-1.54057	2.78247	-0.553668	0.579806	NA	ftr55
ENSDARG00000009169	591.051	0.111533	0.138143	0.807374	0.419451	0.711307	mob1ba
ENSDARG00000009170	5249.79	-0.0120555	0.0845874	-0.142522	0.886668	0.960212	ctr9
ENSDARG00000009178	155.051	0.311701	0.179687	1.73469	0.0827957	0.300782	zfand1
ENSDARG00000009194	52.0218	-1.20464	0.484421	-2.48677	0.0128908	0.0876292	col16a1
ENSDARG00000009196	62.6067	0.227824	0.334347	0.681401	0.495618	0.768237	anxa3a
ENSDARG00000009208	31.2328	-0.190008	0.39402	-0.482228	0.629644	0.846733	prkcda
ENSDARG00000009209	647.062	-0.182253	0.15532	-1.1734	0.240635	0.550162	slc9a6a
ENSDARG00000009212	17865.1	0.0325009	0.124049	0.262	0.793322	0.922781	ppiaa
ENSDARG00000009214	866.954	0.397322	0.119323	3.32981	0.000869057	0.0115147	mfsd13a
ENSDARG00000009215	4.37669	0.344422	0.864557	0.39838	0.69035	0.876417	zgc:112437
ENSDARG00000009217	412.315	-0.0334442	0.142162	-0.235253	0.814012	0.930031	tom1l2
ENSDARG00000009218	45.7661	0.240693	0.37387	0.643787	0.519714	0.783166	mars2
ENSDARG00000009242	0.579935	1.24035	2.72046	0.455934	0.648438	NA	NA
ENSDARG00000009250	593.552	-0.130289	0.146519	-0.889225	0.373882	0.679141	etfb
ENSDARG00000009252	71.9154	-0.179979	0.305324	-0.589468	0.555547	0.804959	napepld
ENSDARG00000009253	534.377	0.285622	0.121702	2.34691	0.0189301	0.11537	rtraf
ENSDARG00000009262	506.929	0.638952	0.352877	1.81069	0.0701881	0.271333	si:dkey-97m3.1
ENSDARG00000009266	248.737	0.0699354	0.143229	0.488276	0.625354	0.84435	uevld
ENSDARG00000009267	42.2637	0.181633	0.338613	0.536403	0.59168	0.826512	zgc:136439
ENSDARG00000009273	2070.95	-0.0660394	0.0945008	-0.698823	0.484662	0.760333	ppm1da
ENSDARG00000009280	6.12342	-0.239571	0.755277	-0.317196	0.751095	0.905912	smyd1a
ENSDARG00000009281	2.05154	0.282189	1.3326	0.211758	0.832296	NA	dnm1b
ENSDARG00000009285	4011.7	-0.032703	0.176613	-0.185167	0.853098	0.947473	rpl15
ENSDARG00000009299	90.6689	-0.818963	0.316655	-2.58629	0.00970148	0.071879	dusp8a
ENSDARG00000009311	12.4973	-0.2467	0.563813	-0.437556	0.661708	0.862405	pvalb6
ENSDARG00000009313	135.436	-0.601001	0.38873	-1.54606	0.12209	0.380219	zgc:63831
ENSDARG00000009315	996.181	-0.105957	0.127579	-0.83052	0.406245	0.702507	clgn
ENSDARG00000009336	1491.73	-0.0080687	0.122025	-0.0661233	0.94728	0.981007	aif1l
ENSDARG00000009341	4.75703	-4.02512	1.336	-3.01281	0.00258842	0.0271981	nrap
ENSDARG00000009342	2479.71	-0.0446755	0.149867	-0.2981	0.765627	0.911891	txndc5
ENSDARG00000009346	4194.96	-0.205354	0.136079	-1.50908	0.131279	0.395282	caprin1a
ENSDARG00000009350	829.201	0.328384	0.128589	2.55376	0.0106567	0.0766285	atg3
ENSDARG00000009351	15.0548	-0.235289	0.467401	-0.503398	0.614684	0.839518	fgf6a
ENSDARG00000009372	4.46421	0.603697	1.06239	0.568242	0.569871	0.814232	diras1b
ENSDARG00000009386	4.8968	-1.15574	1.0108	-1.14339	0.252877	0.56445	si:ch211-222n4.6
ENSDARG00000009387	56.1154	-0.641657	0.322754	-1.98807	0.0468043	0.211387	robo4
ENSDARG00000009390	187.127	-0.761319	0.35139	-2.1666	0.0302657	0.15975	npl
ENSDARG00000009401	15.0835	-1.13698	0.498926	-2.27885	0.0226759	0.131102	vcanb
ENSDARG00000009402	12.5711	0.831911	0.53449	1.55646	0.119599	0.375977	si:ch211-210b2.2
ENSDARG00000009418	28.8941	-0.206143	0.391823	-0.526113	0.59881	0.830589	mef2cb
ENSDARG00000009430	5.28599	1.19079	0.843533	1.41167	0.158046	0.439115	tmem30c
ENSDARG00000009436	1083.48	-0.143637	0.121676	-1.18049	0.237805	0.546137	ubxn7
ENSDARG00000009438	1.44307	0.597078	1.59474	0.374405	0.708103	NA	myog
ENSDARG00000009443	12.3955	0.631658	0.724402	0.871972	0.383224	0.686699	zgc:92137
ENSDARG00000009447	2485.09	0.221241	0.13118	1.68654	0.091691	0.320038	atp5mc3b
ENSDARG00000009459	142.354	-0.442858	0.280837	-1.57692	0.114813	0.367047	slc35e4
ENSDARG00000009466	0.386334	-1.12539	3.39963	-0.331032	0.740621	NA	NA
ENSDARG00000009470	200.323	-0.2916	0.268537	-1.08588	0.277531	0.589295	hnf1a
ENSDARG00000009471	47.2199	0.461303	0.379599	1.21524	0.224276	0.530634	nid2b
ENSDARG00000009472	117.255	0.241165	0.23478	1.02719	0.30433	0.617507	med19b
ENSDARG00000009473	609.516	0.0263506	0.121901	0.216164	0.82886	0.936791	ppardb
ENSDARG00000009477	7.28738	0.494679	0.715648	0.691232	0.48942	0.763893	prkar2ab
ENSDARG00000009480	1612.77	0.0578858	0.112042	0.516641	0.605406	0.834521	pdcl
ENSDARG00000009482	14.5328	-4.82647	0.948005	-5.09119	3.55828e-07	1.52044e-05	NA
ENSDARG00000009484	15783.8	0.0777769	0.116937	0.665117	0.505976	0.774107	arf1
ENSDARG00000009488	392.864	-0.0938959	0.131697	-0.712968	0.475865	0.754418	gipc2
ENSDARG00000009493	49.5316	0.571204	0.297798	1.91809	0.055099	0.233983	MAP3K13
ENSDARG00000009494	3269.4	-0.0640208	0.132423	-0.483456	0.628772	0.846428	xrcc1
ENSDARG00000009499	362.212	-0.0322695	0.20489	-0.157496	0.874854	0.956014	syne1a
ENSDARG00000009505	481.116	0.131601	0.119639	1.09999	0.271337	0.582742	prelid3b
ENSDARG00000009511	0.108947	0	4.08052	0	1	NA	NA
ENSDARG00000009524	626.999	-0.113232	0.143383	-0.789714	0.429695	0.719618	rnf150b
ENSDARG00000009525	1205.01	-0.259941	0.0862903	-3.0124	0.00259188	0.0272196	tial1
ENSDARG00000009534	6357.18	-0.296254	0.110694	-2.67634	0.00744318	0.0600408	wls
ENSDARG00000009544	1575.35	0.644338	0.234766	2.7446	0.00605855	0.0518112	cldnb
ENSDARG00000009549	15979	-0.016746	0.205766	-0.081384	0.935137	0.97659	ubr4
ENSDARG00000009550	4.39559	0.00138482	0.892085	0.00155234	0.998761	0.999541	foxi3b
ENSDARG00000009553	0.108947	0	4.08052	0	1	NA	gng3
ENSDARG00000009557	580.212	-0.177892	0.176382	-1.00856	0.313185	0.626402	wrap73
ENSDARG00000009567	100.03	1.7224	0.265844	6.47899	9.23378e-11	8.23815e-09	spegb
ENSDARG00000009568	17.8104	-0.602214	0.509173	-1.18273	0.236916	0.545277	ca10b
ENSDARG00000009585	2303.12	0.0434411	0.142952	0.303886	0.761215	0.91035	papola
ENSDARG00000009594	615.112	0.162008	0.200054	0.809821	0.418043	0.71041	nr1d2b
ENSDARG00000009607	1685.19	-0.0365407	0.107326	-0.340465	0.733506	0.897687	ccnc
ENSDARG00000009610	649.874	-0.482285	0.200207	-2.40893	0.0159993	0.102671	rgs12a
ENSDARG00000009612	0.517751	-2.60557	2.64583	-0.984786	0.324729	NA	chia.3
ENSDARG00000009624	0.583663	-0.717869	3.00766	-0.23868	0.811354	NA	CABZ01027646.1
ENSDARG00000009626	4.6019	-0.422461	0.895363	-0.471832	0.637047	0.850941	nrbp2b
ENSDARG00000009629	10778.3	0.215989	0.124792	1.73079	0.0834884	0.302125	unc119.1
ENSDARG00000009637	4.32287	-0.103779	0.955153	-0.108651	0.913479	0.967607	rcvrn3
ENSDARG00000009640	1678.11	0.0197978	0.0812602	0.243635	0.807514	0.927543	psmb1
ENSDARG00000009653	293.92	-0.746802	0.161119	-4.6351	3.56758e-06	0.000119359	lhfpl2a
ENSDARG00000009657	379.742	-0.0576767	0.132048	-0.436787	0.662266	0.862721	fgfr1op2
ENSDARG00000009673	6.32867	1.02182	0.782271	1.30623	0.191476	0.48691	si:ch211-197g15.6
ENSDARG00000009677	339.77	-0.578395	0.185418	-3.11942	0.00181207	0.0204932	dlg1
ENSDARG00000009681	1011.47	0.0714078	0.0998802	0.714935	0.474649	0.753395	med27
ENSDARG00000009685	332.473	0.00903305	0.141699	0.0637482	0.949171	0.981671	ppa2
ENSDARG00000009689	633.816	-0.0344681	0.236447	-0.145775	0.884099	0.958834	daam1b
ENSDARG00000009693	2399.57	0.0450643	0.140111	0.321633	0.74773	0.904155	llgl1
ENSDARG00000009702	31.9487	-1.33637	0.505365	-2.64437	0.00818437	0.0638547	ascl1b
ENSDARG00000009724	5784.21	0.18561	0.115366	1.60889	0.107641	0.352492	rpn2
ENSDARG00000009727	3.0455	-2.15987	1.17396	-1.83983	0.0657939	0.26062	twf2b
ENSDARG00000009733	692.832	0.11919	0.24211	0.492297	0.62251	0.843155	kif21b
ENSDARG00000009735	5137.93	-0.00156429	0.0791093	-0.0197737	0.984224	0.994042	gigyf2
ENSDARG00000009738	2.72365	-1.05442	1.14917	-0.917546	0.358857	NA	cacnb4a
ENSDARG00000009740	1887.94	0.0720291	0.138313	0.520767	0.602529	0.832891	ppp1r7
ENSDARG00000009743	21.5709	-0.643124	0.386369	-1.66453	0.0960057	0.329615	efhc1
ENSDARG00000009745	1191.04	0.0689128	0.0885195	0.778504	0.436272	0.724776	fbxw2
ENSDARG00000009748	176.397	-0.0759546	0.189959	-0.399847	0.689269	0.875892	dffb
ENSDARG00000009753	1637.4	0.037564	0.145283	0.258556	0.795978	0.923304	sf3b6
ENSDARG00000009754	3292.23	0.223482	0.12247	1.82479	0.0680333	0.265646	zc3h11a
ENSDARG00000009764	237.931	0.576068	0.169713	3.39437	0.000687872	0.00967591	srek1
ENSDARG00000009771	246.913	0.338618	0.165428	2.04692	0.0406664	0.193502	ppme1
ENSDARG00000009779	1284.76	0.0761291	0.121468	0.626744	0.530827	0.790172	mcl1a
ENSDARG00000009782	8.99299	-0.00282692	0.661686	-0.00427231	0.996591	0.998843	myh11a
ENSDARG00000009783	413.035	-0.188899	0.191391	-0.986982	0.323651	0.637413	dirc2
ENSDARG00000009796	119.359	-0.240094	0.180393	-1.33095	0.183205	0.4754	klc1a
ENSDARG00000009806	468.682	0.031964	0.13866	0.23052	0.817688	0.931788	smfn
ENSDARG00000009822	26.4764	-0.385712	0.495887	-0.777821	0.436674	0.724975	NA
ENSDARG00000009823	112.215	-1.16253	0.296859	-3.91611	8.99878e-05	0.0018687	pou3f1
ENSDARG00000009825	7.40765	-0.163008	0.717566	-0.227168	0.820293	0.932288	mmp23bb
ENSDARG00000009830	52502.6	0.0972637	0.0660383	1.47284	0.140795	0.411785	hdlbpa
ENSDARG00000009837	415.4	-0.622422	0.152227	-4.08877	4.3367e-05	0.00101177	agk
ENSDARG00000009839	15.737	-0.638799	0.529529	-1.20635	0.227682	0.534298	fam117bb
ENSDARG00000009844	8.03735	0.329743	0.645215	0.511059	0.60931	0.836445	dusp23a
ENSDARG00000009851	84.9885	0.0477816	0.24972	0.19134	0.848259	0.945227	wdr41
ENSDARG00000009862	1682.66	0.250166	0.103492	2.41725	0.0156384	0.10092	dcps
ENSDARG00000009864	1480.31	0.0317952	0.0977969	0.325115	0.745094	0.903218	ddx55
ENSDARG00000009868	565.957	0.353993	0.129781	2.72762	0.0063793	0.0538362	dcaf11
ENSDARG00000009870	265.201	-0.0225048	0.84047	-0.0267765	0.978638	0.99244	mapk8b
ENSDARG00000009871	7524.83	0.152151	0.110177	1.38097	0.167287	0.453624	snrpc
ENSDARG00000009874	4.87618	-0.387115	0.831318	-0.465664	0.641456	0.853341	NA
ENSDARG00000009881	6560.65	-0.0690522	0.0882375	-0.782572	0.433878	0.723053	ier5
ENSDARG00000009885	67.5893	0.197332	0.236232	0.835334	0.403529	0.7002	sult3st1
ENSDARG00000009886	77.2468	0.145869	0.256521	0.568643	0.569599	0.814177	rnf114
ENSDARG00000009899	3.33159	-0.41271	1.47369	-0.280051	0.779438	0.917852	NA
ENSDARG00000009901	173.184	-0.299165	0.327045	-0.914752	0.360322	0.66973	slc38a5a
ENSDARG00000009922	1065.51	0.111464	0.333741	0.333984	0.738392	0.899726	dmbx1a
ENSDARG00000009930	2.14644	0.416275	1.32462	0.314259	0.753324	NA	cadm2a
ENSDARG00000009939	322.676	1.00361	0.192131	5.22357	1.75507e-07	8.14987e-06	micu2
ENSDARG00000009941	13.8248	0.226405	0.555086	0.407874	0.683366	0.872524	erc1a
ENSDARG00000009942	6142.46	0.284279	0.119815	2.37265	0.0176611	0.10979	cdc6
ENSDARG00000009949	3.92989	-0.711113	0.962782	-0.738603	0.460148	0.742781	fndc4b
ENSDARG00000009950	2408.39	0.000610877	0.106159	0.00575437	0.995409	0.99883	edf1
ENSDARG00000009953	3587.17	-0.0870105	0.224919	-0.386852	0.698866	0.881	med14
ENSDARG00000009958	911.905	-0.112026	0.253226	-0.442395	0.658204	0.860999	cbl
ENSDARG00000009961	954.985	-0.145279	0.348157	-0.41728	0.676474	0.868949	rundc3b
ENSDARG00000009978	94.8838	0.330352	0.516295	0.639851	0.52227	0.784708	NA
ENSDARG00000009982	3649.01	-0.271787	0.121794	-2.23152	0.0256465	0.14309	fam199x
ENSDARG00000010002	202.75	-0.376923	0.18357	-2.05329	0.0400441	0.191915	gna11a
ENSDARG00000010008	105.767	-0.317959	0.316606	-1.00427	0.315247	0.628699	vim
ENSDARG00000010010	357.409	0.104105	0.168203	0.618929	0.535963	0.793781	trim13
ENSDARG00000010018	548.804	-0.101525	0.301622	-0.336598	0.73642	0.898769	qki2
ENSDARG00000010021	913.16	0.340762	0.169198	2.01399	0.0440106	0.203535	grpel1
ENSDARG00000010023	32.2364	0.310509	0.339538	0.914503	0.360453	0.669813	CU856539.1
ENSDARG00000010029	1.91812	0.254999	1.49286	0.170812	0.864371	NA	spon1a
ENSDARG00000010031	122.713	-0.205124	0.307795	-0.666432	0.505135	0.773433	ssh1b
ENSDARG00000010032	60.631	-1.0747	0.331075	-3.2461	0.00116997	0.0146787	cmtm7
ENSDARG00000010035	181.686	-0.424742	0.156059	-2.72167	0.00649533	0.0544587	engase
ENSDARG00000010042	4.3992	0.241741	0.915123	0.264162	0.791655	0.922258	dnm1a
ENSDARG00000010047	8.20467	0.0606737	0.670315	0.0905152	0.927878	0.973551	neu3.2
ENSDARG00000010051	512.875	0.530219	0.137414	3.85855	0.000114062	0.00228017	ufd1l
ENSDARG00000010052	395.038	0.130351	0.160705	0.81112	0.417297	0.709773	ndrg3b
ENSDARG00000010059	193.008	-0.880165	0.264486	-3.32783	0.000875242	0.011573	itpkb
ENSDARG00000010070	396.617	0.734113	0.190621	3.85116	0.00011756	0.00234523	adam9
ENSDARG00000010075	2.3684	-2.35218	1.36823	-1.71914	0.0855885	NA	CR792422.1
ENSDARG00000010078	2774.03	-0.0280666	0.143823	-0.195147	0.845278	0.944112	nup133
ENSDARG00000010083	5.10879	-0.438071	0.919323	-0.476515	0.633708	0.848599	rbfox3a
ENSDARG00000010085	1512.19	-0.244834	0.116918	-2.09408	0.0362532	0.180111	p4ha2
ENSDARG00000010096	1.9762	-0.779787	1.45093	-0.537441	0.590963	NA	slc1a6
ENSDARG00000010098	1302.81	-0.0593238	0.149301	-0.397344	0.691114	0.876715	pank1b
ENSDARG00000010108	187.388	0.281464	0.223705	1.25819	0.208322	0.509917	bri3bp
ENSDARG00000010113	848.066	0.0242564	0.155577	0.155913	0.876102	0.956617	ndufb8
ENSDARG00000010130	1.64399	0.0645431	1.59272	0.0405237	0.967676	NA	smpdl3b
ENSDARG00000010132	34.0977	-0.711313	0.466927	-1.52339	0.12766	0.38988	dacha
ENSDARG00000010137	3421.47	0.1543	0.0879988	1.75344	0.0795273	0.293732	ldb1a
ENSDARG00000010144	124.234	-0.885056	0.232749	-3.80262	0.000143174	0.00274811	plppr3a
ENSDARG00000010145	1450.77	0.26951	0.155579	1.73231	0.0832186	0.301846	tor4aa
ENSDARG00000010146	11.9263	-0.324648	0.692331	-0.46892	0.639127	0.852181	cpa2
ENSDARG00000010149	8209.89	-0.0825936	0.0838167	-0.985408	0.324424	0.638347	atp5fa1
ENSDARG00000010154	0.459262	0	3.94744	0	1	NA	NA
ENSDARG00000010155	527.239	0.0274193	0.128255	0.213787	0.830713	0.93788	abi1a
ENSDARG00000010160	4413.62	-0.0281801	0.170373	-0.165402	0.868627	0.953009	rps15a
ENSDARG00000010169	71.7964	-0.208047	0.263064	-0.790862	0.429025	0.719059	myd88
ENSDARG00000010181	1826.33	-0.0310291	0.102018	-0.304153	0.761011	0.910332	asap2a
ENSDARG00000010183	6.32498	-0.743335	0.818697	-0.907949	0.363905	0.671854	si:ch73-265h17.1
ENSDARG00000010186	178.633	0.277076	0.31443	0.881198	0.37821	0.682635	myo3a
ENSDARG00000010192	752.069	-0.116813	0.222107	-0.525929	0.598938	0.830668	pax3a
ENSDARG00000010194	13287.5	0.00965274	0.0759453	0.127101	0.89886	0.964112	eif4bb
ENSDARG00000010207	35.9508	-0.062854	0.299714	-0.209713	0.833892	0.939347	smad3b
ENSDARG00000010231	0.116771	0	4.08052	0	1	NA	ppm1na
ENSDARG00000010238	3648.62	0.125028	0.156847	0.797131	0.425375	0.715868	rbm22
ENSDARG00000010244	2896.06	0.293016	0.226573	1.29325	0.195924	0.492518	rpl22l1
ENSDARG00000010246	48534.2	0.22716	0.142507	1.59402	0.110931	0.358561	prmt1
ENSDARG00000010248	64.6903	0.0383338	0.301595	0.127104	0.898858	0.964112	wdr54
ENSDARG00000010250	1366.48	0.307449	0.15863	1.93815	0.0526045	0.227602	nqo1
ENSDARG00000010252	1.03005	0	2.53497	0	1	NA	jak3
ENSDARG00000010255	70.0862	-0.114335	0.292821	-0.390461	0.696196	0.879428	bin2b
ENSDARG00000010266	6045.6	0.0679081	0.15386	0.441364	0.65895	0.861393	igf2bp3
ENSDARG00000010267	462.26	1.12149	0.271536	4.13016	3.62511e-05	0.000877568	dpydb
ENSDARG00000010270	0.310358	-1.56279	3.67115	-0.425695	0.67033	NA	NA
ENSDARG00000010276	948.949	0.803104	0.16595	4.83943	1.30212e-06	4.89145e-05	ptgs2b
ENSDARG00000010279	841.231	-0.298205	0.138078	-2.15968	0.0307971	0.161789	scamp2
ENSDARG00000010280	1753.72	0.0793536	0.196141	0.404574	0.685791	0.874066	clasp1a
ENSDARG00000010281	2381.48	-0.0563859	0.115153	-0.489662	0.624373	0.843899	xpo4
ENSDARG00000010294	0.429244	-1.24739	3.99217	-0.31246	0.754691	NA	NA
ENSDARG00000010296	2.24031	1.09469	1.24948	0.876118	0.380966	NA	kcnh6b
ENSDARG00000010300	394.874	-0.135894	0.154092	-0.8819	0.377831	0.682141	traf3ip1
ENSDARG00000010301	5391.06	-0.0235454	0.175046	-0.13451	0.892999	0.962966	b4galt6
ENSDARG00000010312	1.74105	-2.83108	1.80106	-1.57189	0.115975	NA	cp
ENSDARG00000010316	2094.58	-0.388021	0.187828	-2.06583	0.0388443	0.188139	qars
ENSDARG00000010317	0.12024	0	4.08052	0	1	NA	gpr183a
ENSDARG00000010318	17.997	-0.310931	0.440817	-0.705351	0.480592	0.75742	srpx
ENSDARG00000010331	848.38	0.0727088	0.100798	0.721331	0.470706	0.750473	si:ch211-26b3.2
ENSDARG00000010332	95.6176	0.572042	0.257668	2.22007	0.0264137	0.145851	zgc:56231
ENSDARG00000010347	4895.38	0.3286	0.180824	1.81724	0.0691804	0.268485	acer1
ENSDARG00000010350	0.10973	1.24035	4.08052	0.303967	0.761153	NA	NA
ENSDARG00000010376	0.334948	-0.683232	4.08052	-0.167437	0.867026	NA	slc5a3a
ENSDARG00000010381	1625.69	0.108857	0.0920503	1.18258	0.236975	0.545347	rnf2
ENSDARG00000010384	0.894493	2.67561	2.48148	1.07823	0.28093	NA	lpar5a
ENSDARG00000010385	6.67682	-1.35082	0.809752	-1.66819	0.095278	0.328227	sept4a
ENSDARG00000010400	582.86	-0.0138847	0.124933	-0.111137	0.911507	0.967006	lrrfip2
ENSDARG00000010407	62.1377	-0.137999	0.372567	-0.370401	0.711084	0.886665	ppp4r4
ENSDARG00000010408	335.91	-0.954284	0.198542	-4.80646	1.53629e-06	5.64998e-05	igsf9b
ENSDARG00000010411	1254.1	0.033867	0.137264	0.246729	0.805118	0.926571	epn1
ENSDARG00000010415	57.2588	0.354312	0.277501	1.2768	0.201674	0.500961	sirt4
ENSDARG00000010420	29.6297	2.28745	0.452751	5.05234	4.36429e-07	1.82835e-05	ndrg1b
ENSDARG00000010423	7.64484	-0.415927	0.669519	-0.621232	0.534447	0.793049	npsn
ENSDARG00000010425	86.7057	-1.35186	0.235429	-5.7421	9.35101e-09	5.66677e-07	scara5
ENSDARG00000010432	889.744	0.345314	0.114181	3.02426	0.0024924	0.0263473	eaf2
ENSDARG00000010434	5.45131	-1.64111	0.764979	-2.1453	0.0319287	0.166065	clu
ENSDARG00000010437	2.15601	-1.88915	1.44778	-1.30486	0.19194	NA	tent5c
ENSDARG00000010442	228.162	-0.140173	0.168914	-0.829848	0.406625	0.702912	rnf11a
ENSDARG00000010445	1477.32	0.221254	0.113657	1.94668	0.0515727	0.224246	trabd
ENSDARG00000010454	6.48092	0.0286688	0.812451	0.0352869	0.971851	0.989305	guca1a
ENSDARG00000010472	10.2819	0.352198	0.654432	0.538173	0.590457	0.825801	atp1a2a
ENSDARG00000010477	2.1994	-1.54637	1.63053	-0.94838	0.342936	NA	p2rx3a
ENSDARG00000010478	62.7163	-0.544088	0.597344	-0.910845	0.362377	0.670833	hsp90aa1.1
ENSDARG00000010481	31474.7	0.187104	0.103394	1.80962	0.0703541	0.271757	bzw1a
ENSDARG00000010482	13.3676	0.800037	0.702001	1.13965	0.254432	0.565988	prg4a
ENSDARG00000010487	6281.52	0.0503055	0.096831	0.519518	0.6034	0.833377	sae1
ENSDARG00000010515	26.5861	0.125708	0.345266	0.364091	0.71579	0.888616	dvl1a
ENSDARG00000010516	6392.3	0.00126784	0.15307	0.00828272	0.993391	0.998027	rpl21
ENSDARG00000010519	581.763	0.310614	0.506008	0.613852	0.539313	0.796152	per3
ENSDARG00000010524	1680.32	0.240925	0.120589	1.99789	0.0457281	0.208619	si:ch211-282j22.3
ENSDARG00000010531	94.0921	-0.0272932	0.239954	-0.113743	0.909441	0.966592	scamp4
ENSDARG00000010553	2167.07	-0.0625952	0.0998599	-0.62683	0.530771	0.790172	mmgt1
ENSDARG00000010555	0.612561	-1.58924	2.29665	-0.691979	0.488951	NA	pdha1b
ENSDARG00000010556	0.116771	0	4.08052	0	1	NA	mmp25b
ENSDARG00000010563	1696.2	0.286038	0.0952237	3.00386	0.00266581	0.0277541	spopla
ENSDARG00000010565	1.42422	-0.52877	1.95034	-0.271117	0.786301	NA	aqp4
ENSDARG00000010571	7043.24	0.115457	0.101984	1.13211	0.257588	0.56925	ezh2
ENSDARG00000010572	992.324	0.335002	0.12686	2.64072	0.00827309	0.0642957	slc25a25a
ENSDARG00000010583	3737.16	-0.0578715	0.188559	-0.306914	0.758908	0.909049	pard3ab
ENSDARG00000010586	44.6506	-0.0347295	0.355192	-0.0977766	0.92211	0.971558	tex9
ENSDARG00000010591	1.44968	-0.511445	1.52925	-0.334442	0.738046	NA	foxn4
ENSDARG00000010596	333.484	-0.0253579	0.132856	-0.190868	0.848629	0.945337	slc7a6os
ENSDARG00000010601	92.3088	-0.117468	0.217415	-0.540295	0.588994	0.825011	mtmr10
ENSDARG00000010603	399.238	-0.371611	0.333275	-1.11503	0.264838	0.575259	kctd9b
ENSDARG00000010610	26.5009	-0.406915	0.583031	-0.69793	0.485221	0.760776	sarm1
ENSDARG00000010619	2.76256	0.475607	1.11262	0.427466	0.66904	NA	themis
ENSDARG00000010625	11.9771	-0.72479	0.652145	-1.11139	0.266399	0.576997	clic2
ENSDARG00000010630	9.78895	-1.32306	0.744159	-1.77792	0.0754167	0.284763	NA
ENSDARG00000010641	4891.14	-0.26831	0.0752592	-3.56515	0.000363649	0.00582534	slc20a1b
ENSDARG00000010654	6.01976	-1.45845	0.753168	-1.93643	0.0528155	0.228253	arhgap42b
ENSDARG00000010655	579.382	0.0751055	0.17562	0.42766	0.668899	0.865473	ppm1k
ENSDARG00000010658	854.858	0.00774555	0.137101	0.056495	0.954947	0.983896	insig1
ENSDARG00000010662	7.7414	0.123754	0.824523	0.150092	0.880692	0.957816	fbxo36a
ENSDARG00000010673	2252.3	0.561419	0.146724	3.82637	0.000130047	0.00253382	trim16
ENSDARG00000010680	90.3799	-0.0668541	0.316166	-0.211453	0.832534	0.938946	NA
ENSDARG00000010681	124.852	-0.134923	0.472438	-0.285588	0.775194	0.916039	tjap1
ENSDARG00000010700	0.193587	-1.56248	4.03961	-0.386791	0.698911	NA	il17d
ENSDARG00000010701	0.814084	-3.42191	2.72699	-1.25483	0.209541	NA	NA
ENSDARG00000010710	309.927	-0.366475	0.540199	-0.678407	0.497514	0.768962	msi1
ENSDARG00000010712	0.965889	-0.367162	1.99989	-0.18359	0.854335	NA	npffr1l3
ENSDARG00000010717	88.5818	0.634685	0.221543	2.86484	0.00417223	0.0393362	chchd10
ENSDARG00000010721	8683.72	0.212173	0.0912359	2.32554	0.0200431	0.120059	2006-09-01
ENSDARG00000010727	30.9218	-0.610737	0.421482	-1.44902	0.147331	0.422943	ttyh2l
ENSDARG00000010728	0.579921	-1.88789	2.55304	-0.739466	0.459624	NA	scin
ENSDARG00000010729	1.14483	-2.82359	2.07155	-1.36303	0.172872	NA	CABZ01073795.1
ENSDARG00000010732	37.3253	0.697579	0.37784	1.84623	0.0648591	0.257711	xrcc4
ENSDARG00000010738	346.42	-0.00625497	0.124828	-0.0501086	0.960036	0.985302	zgc:101716
ENSDARG00000010745	1506.83	0.154494	0.117919	1.31017	0.190139	0.485448	dnaja2l
ENSDARG00000010752	2749.67	0.000159691	0.101107	0.00157942	0.99874	0.999541	acsl4b
ENSDARG00000010756	30.6176	-0.162066	0.375181	-0.431968	0.665765	0.864432	nod2
ENSDARG00000010758	5.13748	-2.68144	1.0824	-2.47732	0.0132374	0.0893203	capn12
ENSDARG00000010764	0.586962	-2.84975	2.54464	-1.1199	0.262756	NA	flj13639
ENSDARG00000010767	25.9523	-1.9292	0.525478	-3.67132	0.000241306	0.00419487	epha4l
ENSDARG00000010770	9867.36	-0.038979	0.101714	-0.383223	0.701554	0.882484	sox19a
ENSDARG00000010773	141.324	0.439341	0.337875	1.30031	0.193496	0.489626	pnpla6
ENSDARG00000010779	2751.89	0.0544815	0.126175	0.431794	0.665891	0.864432	tlk2
ENSDARG00000010782	38.9932	0.644756	0.295804	2.17967	0.0292818	0.156443	zgc:55621
ENSDARG00000010784	3047.25	-0.167815	0.12589	-1.33302	0.182524	0.474557	ppp1r12a
ENSDARG00000010785	84.6368	-1.68397	0.492703	-3.41782	0.000631244	0.00904439	thbs1b
ENSDARG00000010789	168.143	-0.889045	0.223641	-3.97532	7.02844e-05	0.00152528	homer3b
ENSDARG00000010791	1819.05	-0.170514	0.130509	-1.30653	0.191374	0.486731	dla
ENSDARG00000010792	5664.05	-0.0790004	0.153098	-0.516011	0.605846	0.834521	cdc25b
ENSDARG00000010794	699.226	0.0469223	0.24152	0.19428	0.845957	0.944574	tfeb
ENSDARG00000010816	11.0057	-0.201953	0.696362	-0.290012	0.771807	0.914178	slc7a14a
ENSDARG00000010823	806.534	-0.118934	0.145012	-0.820168	0.41212	0.706787	memo1
ENSDARG00000010831	536.863	0.611651	0.249293	2.45354	0.0141457	0.0938388	churc1
ENSDARG00000010844	484.197	0.0168834	0.126014	0.13398	0.893418	0.963085	kras
ENSDARG00000010862	208.674	0.123356	0.150378	0.820304	0.412043	0.706787	amt
ENSDARG00000010873	4961.06	-0.146493	0.155403	-0.942669	0.34585	0.657805	si:dkey-156n14.5
ENSDARG00000010878	3903.25	-0.0527537	0.0861902	-0.612061	0.540497	0.796612	cdkn1ca
ENSDARG00000010905	656.576	0.180818	0.116638	1.55025	0.121082	0.378058	mettl13
ENSDARG00000010918	240.742	0.298357	0.153383	1.94518	0.0517534	0.224829	nprl3
ENSDARG00000010925	0.810222	-1.9019	2.20644	-0.861977	0.3887	NA	HTRA3
ENSDARG00000010933	12.6448	0.133805	0.529686	0.252611	0.800568	0.924901	cacna1fa
ENSDARG00000010934	40.4241	0.429012	0.38433	1.11626	0.264312	0.574748	syt14a
ENSDARG00000010936	8.94551	0.298776	0.650301	0.459443	0.645916	0.855586	abcb4
ENSDARG00000010940	140.367	0.216915	0.187148	1.15906	0.246432	0.556545	NA
ENSDARG00000010941	91.2998	-0.00578732	0.22253	-0.026007	0.979252	0.992592	pomgnt2
ENSDARG00000010945	338.438	-0.178076	0.169404	-1.05119	0.293169	0.604888	rapgef6
ENSDARG00000010946	16920.5	1.24787	0.0868516	14.3678	8.23748e-47	1.76383e-43	cbsb
ENSDARG00000010948	14540.5	0.140533	0.117719	1.1938	0.232557	0.539953	kif11
ENSDARG00000010953	11.5963	1.4571	0.62659	2.32544	0.0200482	0.120059	ndel1a
ENSDARG00000010956	767.826	0.313469	0.11757	2.66623	0.00767064	0.0613216	sh3glb1b
ENSDARG00000010957	23.2994	-1.11378	0.413785	-2.69168	0.00710935	0.0580527	mpp2b
ENSDARG00000010958	1.52343	-1.01272	1.53217	-0.66097	0.508632	NA	glmnb
ENSDARG00000010962	520.975	-0.442084	0.135236	-3.26899	0.00107932	0.0136839	fkbp7
ENSDARG00000010965	3282.32	0.0355127	0.10637	0.33386	0.738485	0.899726	psma8
ENSDARG00000010977	80.0697	-0.510335	0.337917	-1.51024	0.130983	0.395054	rab34b
ENSDARG00000010978	826.045	0.714886	0.129431	5.5233	3.3269e-08	1.79086e-06	trmt1
ENSDARG00000010981	96.9323	-1.38604	0.351325	-3.94518	7.97386e-05	0.00168862	zdhhc3a
ENSDARG00000011000	1784.44	0.0708913	0.141269	0.501817	0.615796	0.839926	gtf2a1
ENSDARG00000011020	5742.43	-0.209099	0.296962	-0.704129	0.481353	0.757793	hnrnpa1a
ENSDARG00000011023	0.465397	2.18315	3.30199	0.661163	0.508508	NA	pdlim3a
ENSDARG00000011026	132.854	0.110469	0.1693	0.652504	0.514076	0.778895	zgc:92907
ENSDARG00000011027	6375.82	-0.0716427	0.115071	-0.622598	0.533549	0.792265	fgfr1a
ENSDARG00000011042	1.98334	0.544284	1.42131	0.382944	0.701761	NA	pgbd5
ENSDARG00000011049	779.925	0.444936	0.153583	2.89705	0.00376695	0.0363146	slc17a9b
ENSDARG00000011055	724.225	-0.0190233	0.158726	-0.11985	0.904602	0.965337	fbxo9
ENSDARG00000011065	91.9557	0.0659546	0.253392	0.260287	0.794642	0.922973	camk2b1
ENSDARG00000011066	25.9783	-3.5788	0.609312	-5.87351	4.26658e-09	2.80619e-07	glra3
ENSDARG00000011072	734.731	-0.083019	0.141657	-0.586056	0.557838	0.806315	ddx11
ENSDARG00000011076	1.6373	0.292316	1.63181	0.179136	0.857831	NA	NA
ENSDARG00000011079	7448.45	0.0149276	0.108491	0.137593	0.890562	0.961673	wdr3
ENSDARG00000011083	138.516	0.951266	0.25228	3.77067	0.00016281	0.00306098	si:dkey-42l23.2
ENSDARG00000011088	10.1129	0.834478	0.621002	1.34376	0.179026	0.469645	si:ch211-288d18.1
ENSDARG00000011091	4.02158	-1.16676	1.15841	-1.00721	0.313835	0.627261	NA
ENSDARG00000011094	7153.61	0.0983675	0.10682	0.920872	0.357117	0.666926	ccna2
ENSDARG00000011122	200.179	0.101479	0.150977	0.672148	0.501489	0.771565	pptc7a
ENSDARG00000011125	18817.4	-0.0110722	0.0862389	-0.12839	0.897841	0.964077	snrpb
ENSDARG00000011141	25.4108	-0.51287	0.454194	-1.12919	0.258818	0.570152	dpysl5a
ENSDARG00000011146	1762.85	0.0209738	0.176063	0.119127	0.905175	0.96555	uqcrb
ENSDARG00000011152	69.2334	-0.603847	0.305345	-1.97759	0.0479751	0.214859	rpp14
ENSDARG00000011157	1930.75	0.18104	0.125779	1.43935	0.150051	0.426622	arhgef18a
ENSDARG00000011163	107.425	-0.461688	0.249851	-1.84786	0.0646233	0.257503	sema3fa
ENSDARG00000011166	6582.46	0.469036	0.201623	2.3263	0.0200024	0.119859	cahz
ENSDARG00000011170	226.29	-0.173243	0.317265	-0.546052	0.58503	0.822868	ndrg2
ENSDARG00000011171	2.25863	0.0102065	1.41409	0.00721771	0.994241	NA	si:ch211-12m10.1
ENSDARG00000011175	600.876	-0.240626	0.223636	-1.07598	0.281938	0.593796	atp6v1d
ENSDARG00000011188	2331.85	0.160592	0.170192	0.943593	0.345378	0.657429	acvr2aa
ENSDARG00000011190	2354.07	-0.238998	0.544361	-0.439044	0.66063	0.862067	fgfr1b
ENSDARG00000011196	1777.69	-0.0372548	0.113828	-0.32729	0.743448	0.902257	dnajc11a
ENSDARG00000011201	10026	-0.211479	0.192802	-1.09688	0.272696	0.583988	rplp2l
ENSDARG00000011219	5072.89	-0.0512406	0.122772	-0.417362	0.676413	0.868949	akt2
ENSDARG00000011222	147.044	-0.269452	0.456177	-0.590675	0.554738	0.804655	ccdc28b
ENSDARG00000011233	178.713	0.302191	0.166838	1.81129	0.0700963	0.271196	pcyt1aa
ENSDARG00000011235	3360.29	0.0236161	0.133705	0.176628	0.8598	0.949797	otx2b
ENSDARG00000011239	5.78202	0.263443	0.835839	0.315183	0.752622	0.906147	ppp1r14aa
ENSDARG00000011240	490.911	-0.0032349	0.152447	-0.0212197	0.98307	0.993779	ift46
ENSDARG00000011245	3742.73	0.15562	0.147706	1.05358	0.292075	0.603854	esrp1
ENSDARG00000011246	2178.53	0.0352578	0.11855	0.29741	0.766154	0.91218	krr1
ENSDARG00000011247	1266.72	0.214438	0.15121	1.41814	0.156149	0.436393	rnpc3
ENSDARG00000011257	90.0754	-1.15038	0.213379	-5.39129	6.99556e-08	3.5016e-06	enpp2
ENSDARG00000011259	5.71759	-0.530284	0.779526	-0.680265	0.496337	0.76836	trpm1a
ENSDARG00000011262	757.719	-0.238611	0.110723	-2.15503	0.0311592	0.16313	traip
ENSDARG00000011272	54.4065	-0.218049	0.282955	-0.770613	0.440937	0.728345	uqcc2
ENSDARG00000011273	2.71718	-1.29218	1.1411	-1.1324	0.257468	NA	tlx2
ENSDARG00000011283	0.108947	0	4.08052	0	1	NA	si:dkey-110k5.10
ENSDARG00000011298	192.143	-0.121441	0.216155	-0.561825	0.574235	0.816203	atf7a
ENSDARG00000011299	1884.41	0.434336	0.136314	3.18629	0.00144108	0.0171745	blzf1
ENSDARG00000011301	262.102	0.350919	0.248846	1.41019	0.158484	0.439952	nae1
ENSDARG00000011312	2427.17	0.199458	0.0899144	2.21831	0.0265339	0.146096	stk3
ENSDARG00000011317	6.06568	-1.93899	0.871047	-2.22605	0.0260109	0.144371	adra1ba
ENSDARG00000011326	7.06543	-0.677467	0.660124	-1.02627	0.304763	0.617877	ankrd45
ENSDARG00000011333	914.886	-0.218175	0.251733	-0.866695	0.386109	0.688959	arhgap33
ENSDARG00000011334	0.29197	-1.43953	4.0512	-0.355334	0.722339	NA	ncaldb
ENSDARG00000011360	896.553	0.127381	0.143344	0.888636	0.374199	0.679595	nfatc2ip
ENSDARG00000011370	85.6241	0.155117	0.231514	0.670009	0.502852	0.772363	fyna
ENSDARG00000011371	5.65338	-0.940989	0.76641	-1.22779	0.219526	0.525276	zgc:64106
ENSDARG00000011373	234.403	0.326104	0.14314	2.27821	0.0227139	0.131171	mknk2a
ENSDARG00000011376	91.6724	2.07427	0.298494	6.94911	3.67588e-12	4.02488e-10	dnase1l4.2
ENSDARG00000011400	0.415232	-2.1671	2.84068	-0.762883	0.445533	NA	tnnc1a
ENSDARG00000011404	4163.84	0.00405347	0.131567	0.0308092	0.975422	0.990794	fen1
ENSDARG00000011405	14806.6	0.0749627	0.124458	0.602313	0.546966	0.799799	rps9
ENSDARG00000011407	97.4417	-0.0512132	0.306329	-0.167183	0.867226	0.95254	col2a1b
ENSDARG00000011410	143.96	0.259644	0.330095	0.786571	0.431533	0.72113	aadat
ENSDARG00000011418	481.865	0.305801	0.165748	1.84498	0.0650404	0.258325	sigmar1
ENSDARG00000011422	18.9648	-0.512811	0.436715	-1.17425	0.240296	0.549644	ryr1a
ENSDARG00000011434	5.87066	0.301278	0.927457	0.324843	0.7453	0.903218	NA
ENSDARG00000011445	296.993	0.392452	0.157939	2.48483	0.0129615	0.08793	elmsan1a
ENSDARG00000011449	20.0072	0.972088	0.456065	2.13147	0.0330505	0.169618	fes
ENSDARG00000011459	1059.94	0.334217	0.174671	1.91342	0.0556948	0.23563	gsna
ENSDARG00000011462	276.548	-1.25152	0.591609	-2.11545	0.0343914	0.174272	otub1b
ENSDARG00000011463	0.756368	-1.65856	2.61347	-0.634619	0.525677	NA	CABZ01044048.1
ENSDARG00000011466	181.623	0.231751	0.205938	1.12535	0.260442	0.571255	afg1la
ENSDARG00000011473	2.54888	-1.68015	1.42268	-1.18097	0.237613	NA	calcrla
ENSDARG00000011487	2.44142	-1.4491	1.23929	-1.1693	0.242284	NA	gnaq
ENSDARG00000011488	275.356	-0.0249664	0.195518	-0.127693	0.898392	0.964112	sirt2
ENSDARG00000011490	36.2226	0.252958	0.331418	0.763261	0.445308	0.731338	scube3
ENSDARG00000011493	307.976	0.0732844	0.145561	0.503462	0.614639	0.839518	dcun1d3
ENSDARG00000011496	1781.4	0.161097	0.130651	1.23304	0.217563	0.522785	ppm1bb
ENSDARG00000011498	53.1863	1.19743	0.296025	4.04502	5.23179e-05	0.00119316	si:ch211-212o1.2
ENSDARG00000011506	480.788	0.0875333	0.134126	0.65262	0.514001	0.778895	lpcat1
ENSDARG00000011510	14938.5	0.03734	0.121851	0.306441	0.759269	0.909264	rcc2
ENSDARG00000011515	22.4841	-0.0603037	0.411203	-0.146652	0.883407	0.958762	orai1a
ENSDARG00000011519	4.49132	2.46856	1.28194	1.92564	0.0541491	0.23153	myl4
ENSDARG00000011521	60.3485	-1.94379	0.325386	-5.9738	2.31788e-09	1.6422e-07	upb1
ENSDARG00000011533	6077.13	0.155957	0.16513	0.944452	0.344939	0.657428	sema6dl
ENSDARG00000011537	117.957	0.0507788	0.441869	0.114918	0.90851	0.966165	ugt2a5
ENSDARG00000011545	500.922	-0.560778	0.160255	-3.49929	0.000466491	0.0070897	arrb2b
ENSDARG00000011549	1.59811	0.722463	1.38087	0.523195	0.600839	NA	c1ql4a
ENSDARG00000011553	2527.23	0.242089	0.168587	1.43598	0.151007	0.428012	atp5pb
ENSDARG00000011555	2849.76	-0.287984	0.148865	-1.93453	0.0530478	0.228955	spag7
ENSDARG00000011564	30851.6	-0.0448941	0.138474	-0.324205	0.745782	0.903218	sfpq
ENSDARG00000011570	322.653	-0.833743	0.217185	-3.83887	0.000123602	0.00244051	pou6f1
ENSDARG00000011571	28.1517	-0.468932	0.414774	-1.13057	0.258235	0.569567	calcrlb
ENSDARG00000011573	203.742	-0.0176757	0.30722	-0.0575343	0.95412	0.983518	abcb11a
ENSDARG00000011579	7.10324	0.416067	0.740842	0.561614	0.574379	0.81628	hoxb10a
ENSDARG00000011581	10.8789	0.269663	0.597319	0.451456	0.651661	0.857132	si:dkey-23k10.5
ENSDARG00000011582	1033.97	-0.377182	0.191788	-1.96666	0.0492225	0.217961	sox5
ENSDARG00000011583	49.1279	0.21566	0.311176	0.693049	0.488279	0.763293	cry1ab
ENSDARG00000011594	2642.83	-0.351312	0.117419	-2.99194	0.0027721	0.028569	smarcb1b
ENSDARG00000011597	4036.1	-0.105079	0.318906	-0.329498	0.741779	0.901569	atxn2l
ENSDARG00000011600	16.8843	-0.23842	0.473865	-0.503139	0.614866	0.839571	epha4b
ENSDARG00000011602	30.0107	0.304299	0.374166	0.813273	0.416062	0.709174	si:dkeyp-117h8.2
ENSDARG00000011605	3231.65	0.453619	0.127322	3.56277	0.000366963	0.00586918	dennd6b
ENSDARG00000011609	1996.03	-0.17639	0.190229	-0.927252	0.353796	0.664356	si:ch211-262e15.1
ENSDARG00000011611	1271.89	0.0838187	0.140141	0.598104	0.54977	0.801274	actr1
ENSDARG00000011613	8145.11	0.0650408	0.108388	0.600073	0.548458	0.800525	rbm39a
ENSDARG00000011615	0.457922	2.11072	2.85644	0.738933	0.459948	NA	mybpc3
ENSDARG00000011618	1169.2	0.197174	0.190719	1.03384	0.30121	0.613984	slc26a2
ENSDARG00000011635	0.116771	0	4.08052	0	1	NA	NA
ENSDARG00000011640	7.50896	-1.7124	0.880857	-1.94401	0.0518937	0.225235	syt5b
ENSDARG00000011648	4338.51	0.129105	0.101019	1.27802	0.201242	0.500212	snrpd1
ENSDARG00000011652	151.275	2.49759	0.237112	10.5334	6.06229e-26	3.65083e-23	si:zfos-979f1.2
ENSDARG00000011661	3142.85	0.133006	0.162198	0.820025	0.412202	0.706787	twf1b
ENSDARG00000011662	2847.28	0.165835	0.0969769	1.71005	0.087257	0.310303	chuk
ENSDARG00000011665	12784.2	0.327067	0.107412	3.04497	0.00232706	0.0249692	aldoaa
ENSDARG00000011671	165.419	0.0387182	0.252892	0.153102	0.878318	0.957335	pde6b
ENSDARG00000011672	6.53034	-0.607027	0.931864	-0.651412	0.514781	0.779589	sema3b
ENSDARG00000011673	73.8872	0.0899583	0.313722	0.286745	0.774307	0.915496	si:ch211-246m6.5
ENSDARG00000011683	1507.97	-0.110185	0.13424	-0.820804	0.411758	0.706787	prtfdc1
ENSDARG00000011696	9.4917	-0.195496	0.597112	-0.327402	0.743364	0.902257	esrrgb
ENSDARG00000011701	22729.5	0.114277	0.194159	0.588572	0.556148	0.805137	ctsll
ENSDARG00000011703	590.45	0.321722	0.17127	1.87845	0.0603192	0.247324	clocka
ENSDARG00000011723	96.4736	0.213247	0.213659	0.99807	0.318245	0.631412	zgc:56556
ENSDARG00000011724	38.9817	-0.423486	0.474181	-0.893089	0.371809	0.678132	marveld1
ENSDARG00000011727	358.908	-0.399067	0.238514	-1.67314	0.0942998	0.326023	b9d1
ENSDARG00000011740	11089.9	0.0447832	0.104371	0.429078	0.667867	0.865412	u2af2b
ENSDARG00000011743	1563.67	-0.144453	0.141189	-1.02312	0.306252	0.619109	pigo
ENSDARG00000011764	1389.37	0.0883351	0.0944205	0.93555	0.349505	0.660767	ints13
ENSDARG00000011769	1180.5	-0.123613	0.249776	-0.494895	0.620674	0.842562	cpm
ENSDARG00000011770	394.753	0.322501	0.179439	1.79727	0.072293	0.27642	dhrs12
ENSDARG00000011777	1395.94	-0.0728239	0.10687	-0.681424	0.495603	0.768237	cttn
ENSDARG00000011783	1616.73	-0.0650483	0.100816	-0.645218	0.518786	0.782382	stag2a
ENSDARG00000011785	616.325	-0.76908	0.983435	-0.782034	0.434195	0.723133	tbx6
ENSDARG00000011797	1.03902	-2.6713	2.03323	-1.31382	0.188907	NA	tent5bb
ENSDARG00000011801	147.361	0.244099	0.17433	1.40021	0.16145	0.44517	wars2
ENSDARG00000011809	52.9933	-0.148286	0.304548	-0.486904	0.626326	0.844785	mical1
ENSDARG00000011818	41.7905	-0.0603044	0.427573	-0.141039	0.887839	0.960563	batf
ENSDARG00000011819	2160.75	-0.00175925	0.207385	-0.00848303	0.993232	0.997968	pcnx1
ENSDARG00000011821	1177.85	-0.273125	0.2365	-1.15486	0.248146	0.558974	plod2
ENSDARG00000011824	104.788	-0.117039	0.31806	-0.367976	0.712891	0.887246	pbxip1b
ENSDARG00000011825	278.912	-0.3014	0.191838	-1.57111	0.116156	0.369122	cetn3
ENSDARG00000011837	114.738	0.553778	0.285029	1.94288	0.0520303	0.225523	zgc:100846
ENSDARG00000011841	490.332	0.0073553	0.185696	0.0396094	0.968405	0.988477	atp5l
ENSDARG00000011845	17.7056	0.683804	0.51253	1.33417	0.182147	0.474181	chn2
ENSDARG00000011851	277.006	-0.171961	0.185604	-0.926493	0.35419	0.664356	map2k5
ENSDARG00000011855	149.1	-0.130212	0.21694	-0.60022	0.548359	0.800508	aak1a
ENSDARG00000011862	534.97	-0.141251	0.162595	-0.868728	0.384996	0.687924	inaa
ENSDARG00000011863	8905	-0.0940549	0.103115	-0.912133	0.361699	0.670544	ptk7a
ENSDARG00000011869	15.9796	-2.08749	0.774467	-2.69539	0.00703072	0.0575814	galnt8a.2
ENSDARG00000011870	11.3316	-0.055315	0.744838	-0.0742644	0.9408	0.979003	sp8a
ENSDARG00000011876	1047.91	0.347057	0.117639	2.95018	0.00317594	0.0318106	ednraa
ENSDARG00000011879	20.0738	-0.427814	0.461272	-0.927465	0.353685	0.664356	foxn1
ENSDARG00000011884	3.58587	-0.630413	1.4328	-0.439986	0.659947	0.861823	MFN1
ENSDARG00000011885	843.368	0.47649	0.119811	3.97702	6.97838e-05	0.00151613	mrpl19
ENSDARG00000011886	1.57882	-0.00636231	1.63149	-0.0038997	0.996889	NA	pdca
ENSDARG00000011890	438.387	-0.220459	0.135157	-1.63113	0.102862	0.343426	cry4
ENSDARG00000011897	389.061	-0.010123	0.131821	-0.076794	0.938787	0.978074	tsg101b
ENSDARG00000011909	843.614	-0.0619223	0.127608	-0.485255	0.627496	0.845451	itpr2
ENSDARG00000011921	3885.44	0.139584	0.0868479	1.60723	0.108004	0.353071	txnl1
ENSDARG00000011925	2151.8	0.205102	0.135487	1.51382	0.130072	0.394266	spns1
ENSDARG00000011926	14.9432	1.01845	0.590762	1.72397	0.0847138	0.304663	tpgs2
ENSDARG00000011929	2.3898	-0.680417	1.20751	-0.563489	0.573102	NA	plp1b
ENSDARG00000011932	2321.36	-0.202627	0.116702	-1.73627	0.0825157	0.300128	prkcbp1l
ENSDARG00000011934	499.317	0.426697	0.211679	2.01577	0.0438237	0.20299	gyg1a
ENSDARG00000011941	270.34	-0.182099	0.154934	-1.17533	0.239863	0.549043	bmpr2a
ENSDARG00000011945	389.593	0.000194984	0.111478	0.00174909	0.998604	0.999541	slc35e1
ENSDARG00000011948	633.087	-0.409938	0.48487	-0.84546	0.397854	0.695739	insra
ENSDARG00000011956	19.9633	-0.0986662	0.504398	-0.195612	0.844914	0.944051	dlx4a
ENSDARG00000011958	3259.99	0.37175	0.114541	3.24556	0.00117219	0.0146875	ctnnbl1
ENSDARG00000011961	191.571	-0.493944	0.260353	-1.89721	0.0578001	0.24042	csrp2
ENSDARG00000011973	1281.33	0.0845496	0.146051	0.578906	0.562652	0.810221	slc35d1a
ENSDARG00000011975	19.2282	-2.25909	0.460606	-4.9046	9.36171e-07	3.64464e-05	fmn1
ENSDARG00000011983	1.76888	-0.172036	1.52663	-0.11269	0.910276	NA	zgc:136908
ENSDARG00000011989	0.197329	0.278557	4.08052	0.0682649	0.945575	NA	crx
ENSDARG00000011998	0.189004	-1.53311	4.04229	-0.379268	0.704489	NA	bfsp2
ENSDARG00000011999	89.7835	-0.1094	0.304436	-0.359351	0.719332	0.890071	ybey
ENSDARG00000012002	4276.07	0.373429	0.15012	2.48754	0.0128629	0.0875285	slc38a7
ENSDARG00000012005	88.5286	-0.305761	0.240826	-1.26963	0.204216	0.504608	mob2b
ENSDARG00000012013	17.5265	-1.23499	0.566593	-2.17967	0.0292818	0.156443	cpa6
ENSDARG00000012016	40.183	0.0192023	0.504312	0.0380761	0.969627	0.988563	hpgd
[truncated: 23,777 more rows]
[truncated: 2 more columns]

## Sheet: S1_3
gene ID	baseMean	log2FoldChange	lfcSE	stat	pvalue	padj	external_gene_name
ENSDARG00000000002	4.21716	-1.2042	1.15078	-1.04642	0.295369	0.48989	ccdc80
ENSDARG00000000018	3527.41	0.0757869	0.160568	0.471994	0.636931	0.78569	nrf1
ENSDARG00000000019	363.012	0.588926	0.157814	3.73176	0.000190146	0.00145013	ube2h
ENSDARG00000000068	581.4	0.946117	0.154103	6.1395	8.27839e-10	2.53109e-08	slc9a3r1a
ENSDARG00000000069	834.755	-0.0705815	0.162679	-0.433869	0.664384	0.805448	dap
ENSDARG00000000086	1658.88	-0.466485	0.158502	-2.9431	0.00324949	0.0158609	itsn1
ENSDARG00000000103	3253.64	-0.811885	0.259993	-3.12271	0.00179193	0.00975669	myh10
ENSDARG00000000142	105.618	0.861333	0.254542	3.38385	0.000714767	0.00448577	tmem267
ENSDARG00000000151	43.8249	-0.699791	0.33422	-2.0938	0.0362776	0.109432	thraa
ENSDARG00000000161	68.286	0.0477406	0.281178	0.169788	0.865177	0.928271	itsn2a
ENSDARG00000000175	2.73533	-2.61633	1.24598	-2.09982	0.035745	0.108358	hoxb2a
ENSDARG00000000183	435.211	-0.594049	0.137664	-4.31521	1.5945e-05	0.000169759	ptpn4b
ENSDARG00000000189	199.339	0.87331	0.243992	3.57925	0.000344583	0.00241697	sema6e
ENSDARG00000000212	19497.9	-0.0851708	0.127179	-0.669691	0.503055	0.681524	krt97
ENSDARG00000000229	356.194	-0.466659	0.134698	-3.46449	0.000531232	0.00349177	usp49
ENSDARG00000000241	26.0347	-0.208695	0.523947	-0.398313	0.690399	0.823608	slc40a1
ENSDARG00000000324	305.87	-0.554765	0.144394	-3.84203	0.000122022	0.00099338	dcaf8
ENSDARG00000000349	4.08939	-1.63973	1.12546	-1.45694	0.145133	0.303925	cfap300
ENSDARG00000000369	4.35052	0.98221	0.957396	1.02592	0.30493	0.500396	prkag3b
ENSDARG00000000370	983.646	-1.36878	0.237179	-5.77108	7.87654e-09	1.96632e-07	triob
ENSDARG00000000380	99.378	0.249834	0.254549	0.981477	0.326357	0.522889	pde6a
ENSDARG00000000394	16927.8	-0.115994	0.0993174	-1.16792	0.242841	0.432438	matr3l1.1
ENSDARG00000000423	78.1755	-0.389939	0.23229	-1.67867	0.093216	0.221034	si:ch73-314g15.3
ENSDARG00000000442	850.796	0.117341	0.135444	0.86634	0.386304	0.580824	slc39a13
ENSDARG00000000472	145.106	0.872016	0.297082	2.93526	0.00333264	0.0161733	cntn2
ENSDARG00000000474	0.250059	0	4.08052	0	1	NA	NA
ENSDARG00000000476	464.842	-0.0666218	0.151354	-0.440171	0.659813	0.802151	pms1
ENSDARG00000000489	1712.42	0.0680689	0.10339	0.658369	0.510301	0.687583	upf3b
ENSDARG00000000503	2.9276	2.15942	1.32168	1.63385	0.102291	0.23641	stx1b
ENSDARG00000000516	47.0786	0.630966	0.342765	1.84081	0.0656489	0.170904	ankar
ENSDARG00000000529	551.476	-0.0176608	0.159548	-0.110693	0.91186	0.954768	ofd1
ENSDARG00000000540	2082.45	-0.446131	0.152594	-2.92364	0.00345962	0.0166382	asdurf
ENSDARG00000000542	1981.86	-0.187613	0.103896	-1.80578	0.070953	0.18078	gtf2e1
ENSDARG00000000551	58.0168	-0.464735	0.311174	-1.49349	0.135309	0.288024	slc1a4
ENSDARG00000000563	8077.82	-1.46749	0.226647	-6.47479	9.49465e-11	3.53665e-09	ttn.1
ENSDARG00000000567	7332.64	-0.0981963	0.132318	-0.742126	0.458011	0.645373	znf281a
ENSDARG00000000568	979.967	0.00927057	0.125422	0.0739153	0.941078	0.971264	ell
ENSDARG00000000588	369.179	1.2338	0.182674	6.75409	1.43737e-11	6.29308e-10	grasp
ENSDARG00000000606	47.0196	-1.16864	0.312403	-3.74082	0.000183422	0.00140892	dnah6
ENSDARG00000000631	2011.35	0.284194	0.190095	1.49501	0.134913	0.287468	ptpn4a
ENSDARG00000000638	0.792419	0.156734	2.46815	0.0635028	0.949366	NA	opn1mw4
ENSDARG00000000651	93.3443	0.181582	0.259037	0.700988	0.483311	0.666634	osgepl1
ENSDARG00000000656	0.308798	-2.27394	3.99103	-0.569764	0.568838	NA	psmb9a
ENSDARG00000000666	64.5041	-1.50144	0.283671	-5.29292	1.2038e-07	2.31301e-06	creg2
ENSDARG00000000690	98.784	-0.0433761	0.36361	-0.119293	0.905043	0.950982	sypl2b
ENSDARG00000000729	3914.36	0.0164844	0.0831179	0.198326	0.84279	0.916141	daxx
ENSDARG00000000730	401.496	-0.399228	0.1979	-2.01732	0.0436624	0.126166	slc6a22.1
ENSDARG00000000747	335.871	-0.0782219	0.157734	-0.49591	0.619958	0.773126	lcmt2
ENSDARG00000000760	87.9156	0.00258725	0.207824	0.0124492	0.990067	0.995124	znf511
ENSDARG00000000767	2.53037	-0.300271	1.19968	-0.250293	0.802361	0.894351	spi1b
ENSDARG00000000779	967.54	-0.0399398	0.12116	-0.329645	0.741668	0.855985	scfd1
ENSDARG00000000796	53.3647	1.63772	0.314246	5.21159	1.87231e-07	3.41616e-06	nr4a1
ENSDARG00000000804	30.0543	-0.924701	0.691429	-1.33738	0.1811	0.355621	rassf6
ENSDARG00000000830	741.544	-0.386295	0.121321	-3.18409	0.0014521	0.0081832	telo2
ENSDARG00000000837	16.0841	0.453315	0.493415	0.918728	0.358238	0.55508	snx9a
ENSDARG00000000853	2239.36	0.191702	0.103548	1.85133	0.0641224	0.167872	dstyk
ENSDARG00000000857	3041.66	0.0643041	0.0829164	0.775529	0.438027	0.62742	mapk14a
ENSDARG00000000861	9891.67	-0.185282	0.137385	-1.34864	0.177453	0.350781	scrib
ENSDARG00000000887	2709.3	0.377697	0.152812	2.47165	0.0134491	0.0502725	zgc:56699
ENSDARG00000000906	53.907	-0.458501	0.436783	-1.04972	0.293846	0.488722	skap2
ENSDARG00000000935	401.72	-0.559391	0.158069	-3.5389	0.000401803	0.00276287	unk
ENSDARG00000000943	1362.28	-0.152025	0.14568	-1.04355	0.296694	0.491323	dzip1
ENSDARG00000000966	2595.05	-0.218016	0.166496	-1.30944	0.190386	0.368501	ncor2
ENSDARG00000001014	2061.54	-0.338842	0.227316	-1.49062	0.136062	0.289258	myh9b
ENSDARG00000001015	897.993	-0.45788	0.228764	-2.00154	0.0453348	0.129708	znf384l
ENSDARG00000001057	2303.13	-0.271906	0.122894	-2.21252	0.0269306	0.0870809	bysl
ENSDARG00000001127	1.88844	-1.05633	1.59733	-0.661314	0.508411	NA	slc17a6a
ENSDARG00000001129	4543.81	-0.415451	0.250244	-1.66019	0.0968766	0.227106	dicer1
ENSDARG00000001154	3.01773	1.29665	1.35609	0.956168	0.338987	0.536103	rimbp2
ENSDARG00000001162	5962.6	-0.0193456	0.136313	-0.14192	0.887143	0.941237	matr3l1.1
ENSDARG00000001169	16.0942	0.683619	0.476258	1.4354	0.151174	0.312795	hsd17b8
ENSDARG00000001210	1588.38	-0.143856	0.0983754	-1.46232	0.143653	0.301355	arl14ep
ENSDARG00000001220	4312.55	-0.245773	0.170668	-1.44007	0.149848	0.310781	mycbp2
ENSDARG00000001234	23.3237	-0.667871	0.584037	-1.14354	0.252813	0.443358	map4k2
ENSDARG00000001241	6412.5	-0.062365	0.0792676	-0.786765	0.431419	0.621601	puf60b
ENSDARG00000001244	4945.13	-0.833539	0.64978	-1.2828	0.199562	0.380687	srrm1
ENSDARG00000001249	323.085	-0.0340829	0.178451	-0.190993	0.848531	0.919571	pcgf1
ENSDARG00000001259	9.10654	-0.866137	0.663381	-1.30564	0.191675	0.370325	gas2a
ENSDARG00000001303	0.599149	-3.23416	3.48071	-0.929165	0.352804	NA	psmb8a
ENSDARG00000001313	4280.4	0.374012	0.127253	2.93911	0.00329152	0.0160252	g2e3
ENSDARG00000001354	36.4039	-2.18489	0.515198	-4.24087	2.22656e-05	0.000227663	slc6a22.2
ENSDARG00000001414	2066.82	-0.305768	0.111485	-2.74267	0.00609412	0.0266294	mctp2a
ENSDARG00000001431	1637.63	-0.178693	0.229656	-0.77809	0.436516	0.626096	actn3b
ENSDARG00000001437	9.03287	0.821321	0.803529	1.02214	0.306714	0.502497	slc2a1a
ENSDARG00000001442	23.009	1.18901	0.446474	2.66311	0.00774227	0.0322398	inppl1b
ENSDARG00000001447	665.152	-0.0882932	0.14257	-0.619296	0.535721	0.708346	mier1b
ENSDARG00000001452	909.921	-0.617275	0.197827	-3.12028	0.00180681	0.00982451	adam8a
ENSDARG00000001463	1.6163	-0.210948	1.35578	-0.155592	0.876355	NA	tdh2
ENSDARG00000001470	32.486	0.10258	0.45171	0.227093	0.820352	0.903229	mhc1zea
ENSDARG00000001498	85.3676	-1.53203	0.452387	-3.38655	0.000707768	0.00445093	skap1
ENSDARG00000001549	2757.96	-0.141513	0.189776	-0.745685	0.455858	0.643144	sp3a
ENSDARG00000001557	940.576	0.248031	0.112042	2.21373	0.0268475	0.0868815	tomm34
ENSDARG00000001558	8191.24	0.372231	0.137023	2.71656	0.00659651	0.0283541	kifc1
ENSDARG00000001559	24.0258	-0.416291	0.462306	-0.900466	0.367872	0.56455	csmd2
ENSDARG00000001572	0.226501	1.19519	4.08052	0.292901	0.769597	NA	prf1.3
ENSDARG00000001578	1040.12	0.394543	0.117247	3.36507	0.000765233	0.00475101	echs1
ENSDARG00000001621	103.261	-0.342321	0.221485	-1.54557	0.122207	0.268218	nfyal
ENSDARG00000001634	355.224	-0.901387	0.32487	-2.77461	0.00552686	0.0245745	kirrel1a
ENSDARG00000001676	205.687	0.354096	0.237069	1.49364	0.135269	0.287978	gpm6bb
ENSDARG00000001686	5.52903	-1.15915	0.786467	-1.47387	0.140517	0.296308	uckl1a
ENSDARG00000001710	448.504	-0.168149	0.134389	-1.25121	0.210858	0.394163	flot1a
ENSDARG00000001712	0.980473	1.80757	2.03268	0.889251	0.373868	NA	si:ch211-247n2.1
ENSDARG00000001721	204.964	0.408668	0.319974	1.27719	0.201535	0.382964	oc90
ENSDARG00000001729	3014.11	0.06526	0.116336	0.560963	0.574823	0.739731	strn3
ENSDARG00000001733	54.8809	-1.06969	0.333452	-3.20792	0.00133699	0.00763873	gulp1a
ENSDARG00000001734	499.878	0.0145601	0.112743	0.129144	0.897244	0.947191	fkbp8
ENSDARG00000001754	4913.72	0.00364008	0.121701	0.0299102	0.976139	0.988575	noc2l
ENSDARG00000001760	16.8992	-0.549584	0.507325	-1.0833	0.278676	0.472283	tnxba
ENSDARG00000001767	251.413	-0.754409	0.326673	-2.30937	0.020923	0.0717284	slc29a2
ENSDARG00000001769	1798.39	-0.175541	0.157287	-1.11606	0.264398	0.456525	ptpra
ENSDARG00000001771	0.116771	1.19519	4.08052	0.292901	0.769597	NA	otol1a
ENSDARG00000001776	302.387	-0.688917	0.16186	-4.25626	2.07871e-05	0.000214441	stim2b
ENSDARG00000001777	4299.18	-0.0567761	0.130506	-0.435045	0.66353	0.804787	nup155
ENSDARG00000001781	27.532	-1.75543	0.58373	-3.00726	0.00263613	0.0133626	tspan11
ENSDARG00000001782	480.208	0.559746	0.131817	4.24638	2.1725e-05	0.000222868	prkacba
ENSDARG00000001785	7.03822	0.117621	0.680451	0.172858	0.862763	0.926903	irx2a
ENSDARG00000001788	645.544	-0.237805	0.191234	-1.24353	0.213674	0.397443	atp5po
ENSDARG00000001803	10.559	-0.010887	0.646804	-0.0168319	0.986571	0.993603	kcnh6a
ENSDARG00000001804	16.2965	-0.0170294	0.495606	-0.0343608	0.972589	0.986903	zgc:112148
ENSDARG00000001807	98.1715	-0.459812	0.256932	-1.78962	0.0735145	0.185396	tnfrsf21
ENSDARG00000001817	15.4427	-0.336339	0.568109	-0.592033	0.553829	0.722901	zmp:0000000521
ENSDARG00000001818	33.9595	-4.78573	1.18711	-4.03143	5.54385e-05	0.000502366	c3b.2
ENSDARG00000001825	67.8199	0.122878	0.302837	0.405755	0.684922	0.820157	cfap43
ENSDARG00000001829	3717.32	0.0888918	0.0906468	0.980639	0.326771	0.523386	zgc:112982
ENSDARG00000001835	86.3807	0.339137	0.34215	0.991194	0.321591	0.518284	nalcn
ENSDARG00000001857	2608.77	0.165424	0.199568	0.828911	0.407155	0.600047	aff4
ENSDARG00000001859	15.6896	-1.89265	0.719912	-2.629	0.00856365	0.0349283	dbx1b
ENSDARG00000001870	20.2374	2.37526	0.505151	4.70207	2.57533e-06	3.46184e-05	atp1a1a.4
ENSDARG00000001873	1545.63	0.54191	0.173631	3.12104	0.00180213	0.00980172	phgdh
ENSDARG00000001879	3507.49	-0.0284616	0.147048	-0.193552	0.846527	0.918335	nav2b
ENSDARG00000001880	127.882	-0.69335	0.28162	-2.46201	0.0138162	0.0512852	stx3a
ENSDARG00000001881	1.08906	-1.96632	2.0222	-0.97237	0.330866	NA	cacnb3a
ENSDARG00000001882	0.211135	-0.728386	4.08052	-0.178503	0.858328	NA	kbtbd12
ENSDARG00000001888	5054.81	0.73988	0.160258	4.6168	3.89706e-06	4.95281e-05	ppm1ba
ENSDARG00000001889	375.151	-0.482088	0.325441	-1.48134	0.138516	0.293127	tuba1a
ENSDARG00000001890	2743.95	-0.204166	0.152366	-1.33997	0.180254	0.35451	stt3b
ENSDARG00000001891	2.77751	-1.67923	1.31302	-1.27891	0.20093	0.382088	syt14b
ENSDARG00000001897	1181.51	0.452244	0.127487	3.54736	0.000389107	0.00268651	man2b1
ENSDARG00000001898	206.549	0.568688	0.183593	3.09756	0.00195124	0.0104529	manea
ENSDARG00000001906	1.03611	1.69512	2.0066	0.844771	0.398239	NA	si:dkey-247m21.3
ENSDARG00000001909	0.581735	3.08665	3.01583	1.02348	0.306079	NA	vill
ENSDARG00000001910	110.314	0.279847	0.241581	1.1584	0.246701	0.436557	rorab
ENSDARG00000001912	6.25673	1.40766	0.803801	1.75125	0.0799022	0.197332	drd4-rs
ENSDARG00000001913	1.4344	1.059	1.68109	0.629953	0.528726	NA	palmda
ENSDARG00000001929	239.739	0.154435	0.152981	1.0095	0.312733	0.508763	pink1
ENSDARG00000001930	856.24	-0.205235	0.0997182	-2.05816	0.0395752	0.117011	klhl15
ENSDARG00000001933	1.36578	-2.88373	2.04936	-1.40714	0.159386	NA	prkag2b
ENSDARG00000001937	0.218176	0.233403	4.08052	0.0571992	0.954386	NA	LO018422.1
ENSDARG00000001939	658.889	-0.344334	0.12891	-2.67113	0.00755968	0.031642	b3gat3
ENSDARG00000001940	2658.67	0.473501	0.0828204	5.71721	1.08289e-08	2.60394e-07	dnajc1
ENSDARG00000001950	2.85394	-0.0693806	1.21486	-0.0571101	0.954457	0.977687	ak1
ENSDARG00000001953	88.911	-0.138323	0.24827	-0.557147	0.577427	0.741717	pfkfb3
ENSDARG00000001968	326.486	0.59362	0.212116	2.79856	0.00513306	0.0230971	dock5
ENSDARG00000001969	2559.13	-0.0140183	0.119493	-0.117315	0.906611	0.951287	txlng
ENSDARG00000001971	0.67005	0.280318	2.38721	0.117425	0.906523	NA	cthrc1b
ENSDARG00000001975	26.3829	-0.00934621	0.376279	-0.0248386	0.980184	0.990691	hsd11b2
ENSDARG00000001976	47.8033	3.19347	0.595678	5.36106	8.27345e-08	1.64908e-06	fkbp16
ENSDARG00000001993	187.781	0.117793	0.176191	0.668555	0.503779	0.681989	myhb
ENSDARG00000001994	3.84075	-1.86828	1.16491	-1.6038	0.108758	0.246961	stxbp1a
ENSDARG00000001999	2371.52	0.049942	0.212966	0.234507	0.814592	0.900739	adamts18
ENSDARG00000002002	30.2842	-0.333745	0.353977	-0.942844	0.345761	0.542864	lmcd1
ENSDARG00000002006	880.214	0.213783	0.119217	1.79322	0.0729379	0.184355	rxrbb
ENSDARG00000002013	815.8	-0.207589	0.120658	-1.72048	0.0853453	0.207264	grb10a
ENSDARG00000002016	1691.48	0.137819	0.107003	1.288	0.197748	0.378486	ppil2
ENSDARG00000002020	1793.93	0.20254	0.119343	1.69713	0.0896722	0.214686	rictorb
ENSDARG00000002021	639.459	0.511411	0.150011	3.40917	0.000651619	0.0041572	pygb
ENSDARG00000002026	3.66237	-1.4875	1.3193	-1.12749	0.259535	0.450663	qkib
ENSDARG00000002031	1636.75	-0.21095	0.153567	-1.37366	0.169546	0.339265	tox4a
ENSDARG00000002037	14.4901	-1.46321	0.575923	-2.54064	0.011065	0.042961	pfkfb2b
ENSDARG00000002060	142.702	-0.0804702	0.282458	-0.284892	0.775727	0.878184	brf2
ENSDARG00000002071	104.468	0.974686	0.272237	3.58028	0.00034322	0.00241075	adss
ENSDARG00000002077	132.392	0.0911026	0.216267	0.42125	0.673573	0.812302	mnat1
ENSDARG00000002082	9752.81	-0.0255047	0.144906	-0.176008	0.860287	0.925607	csnk2a1
ENSDARG00000002084	25.1503	-0.633998	0.391346	-1.62004	0.105223	0.241479	lamb2
ENSDARG00000002127	869.57	0.199281	0.0960719	2.07429	0.0380522	0.11353	stam
ENSDARG00000002128	2169.09	0.0685353	0.0854179	0.802353	0.422349	0.613395	cwf19l1
ENSDARG00000002131	13.7294	0.161487	0.627503	0.257348	0.79691	0.890233	celf2
ENSDARG00000002165	233.965	0.469889	0.284095	1.65399	0.0981305	0.229376	psme1
ENSDARG00000002167	179.849	-0.263379	0.161883	-1.62698	0.103742	0.238924	cacnb1
ENSDARG00000002168	1869.06	0.108606	0.11365	0.95562	0.339264	0.536362	tra2b
ENSDARG00000002172	3170.31	0.459597	0.12041	3.81692	0.00013513	0.0010857	aplnra
ENSDARG00000002174	92.228	-0.546609	0.292856	-1.86648	0.0619743	0.163728	itfg2
ENSDARG00000002184	762.504	0.109645	0.103508	1.0593	0.289464	0.483976	igbp1
ENSDARG00000002190	1018.57	0.444387	0.14409	3.08408	0.0020418	0.0108236	chmp2bb
ENSDARG00000002192	0.738326	0.247586	2.16646	0.114282	0.909015	NA	aspn
ENSDARG00000002193	0.839513	2.70839	2.2274	1.21594	0.224006	NA	NA
ENSDARG00000002194	8.52499	1.4904	0.690996	2.15689	0.0310144	0.0972255	rhd
ENSDARG00000002196	374.238	-0.395478	0.163674	-2.41625	0.0156812	0.056824	bach1b
ENSDARG00000002197	308.697	0.27313	0.199121	1.37168	0.170163	0.340006	pygl
ENSDARG00000002204	1.02064	-1.7395	2.24748	-0.773977	0.438945	NA	hspb11
ENSDARG00000002210	59.1064	-0.363509	0.31138	-1.16741	0.243044	0.432663	stk25a
ENSDARG00000002213	279.999	-0.174238	0.170583	-1.02143	0.307051	0.502968	invs
ENSDARG00000002215	6646.67	0.174724	0.0951241	1.8368	0.0662394	0.172036	rtca
ENSDARG00000002216	1422.5	0.173009	0.170886	1.01242	0.311336	0.507445	tbx3a
ENSDARG00000002217	1433.36	-0.357469	0.17014	-2.10103	0.0356383	0.108147	scocb
ENSDARG00000002219	0.101405	-0.728386	4.08052	-0.178503	0.858328	NA	si:dkey-103j14.5
ENSDARG00000002220	1078.52	0.233307	0.103583	2.25237	0.0242989	0.0804577	zgc:103692
ENSDARG00000002230	112.681	-0.697632	0.325522	-2.14312	0.0321035	0.099676	sypb
ENSDARG00000002231	17.4617	-0.640603	0.462271	-1.38577	0.165816	0.334188	plpp2a
ENSDARG00000002235	18.358	-0.335427	0.483232	-0.694132	0.487599	0.669724	mmp14a
ENSDARG00000002240	2535.8	-0.0609905	0.124582	-0.489563	0.624443	0.776046	psmb6
ENSDARG00000002241	96.0403	0.404851	0.348265	1.16248	0.24504	0.435032	kcna2a
ENSDARG00000002249	12.9843	1.54166	0.553557	2.78501	0.00535258	0.0239149	tbxas1
ENSDARG00000002255	87.3073	1.53121	0.253345	6.04397	1.50372e-09	4.41127e-08	epb41l3a
ENSDARG00000002259	0.932912	1.05656	2.29116	0.461148	0.644692	NA	NA
ENSDARG00000002267	2546.61	0.0485529	0.113234	0.428786	0.668079	0.808323	dcaf13
ENSDARG00000002271	1141.4	0.674128	0.12294	5.48339	4.17254e-08	8.866e-07	zfand5b
ENSDARG00000002285	766.853	0.939491	0.139082	6.75496	1.42878e-11	6.26901e-10	mcoln1a
ENSDARG00000002293	292.329	-0.864679	0.542361	-1.59429	0.110872	0.250333	si:ch211-197g15.6
ENSDARG00000002295	1.39665	-0.0534466	1.49059	-0.0358559	0.971397	NA	NA
ENSDARG00000002298	44.9544	1.17647	0.331066	3.55359	0.000380008	0.00263265	ankrd22
ENSDARG00000002299	38.1935	-0.727835	0.349499	-2.08251	0.0372963	0.111717	arsh
ENSDARG00000002300	6.4622	1.99965	1.17976	1.69496	0.0900822	0.215438	p2rx2
ENSDARG00000002304	229.006	0.0645988	0.265146	0.243635	0.807513	0.897331	gins2
ENSDARG00000002305	413.771	-0.0548	0.257234	-0.213035	0.831299	0.90949	me3
ENSDARG00000002311	0.422774	0.24231	2.86246	0.0846512	0.932539	NA	fabp11b
ENSDARG00000002330	1.9501	0.795659	1.23035	0.646696	0.517829	NA	lhx8a
ENSDARG00000002332	830.116	-0.251281	0.099643	-2.52181	0.0116753	0.0447898	frmd6
ENSDARG00000002333	162.672	-0.0152256	0.172553	-0.0882373	0.929688	0.965456	fam102bb
ENSDARG00000002336	6094.39	-0.287381	0.0873842	-3.28871	0.00100649	0.00601316	dlc
ENSDARG00000002339	424.469	0.0732869	0.151521	0.483675	0.628617	0.778719	sgf29
ENSDARG00000002344	2171.92	0.373061	0.123231	3.02734	0.00246715	0.0126721	tubb4b
ENSDARG00000002347	5655.29	0.943713	0.106718	8.84308	9.31148e-19	1.36778e-16	cyp11a1
ENSDARG00000002353	128.085	1.91586	0.298891	6.40988	1.45632e-10	5.28106e-09	tagapa
ENSDARG00000002355	70.4239	0.838334	0.31353	2.67386	0.00749845	0.0314247	shpk
ENSDARG00000002362	1100.63	0.383588	0.137321	2.79338	0.00521611	0.0234084	ubald1a
ENSDARG00000002365	707.72	-0.480072	0.133012	-3.60923	0.000307106	0.00219589	cers5
ENSDARG00000002369	9.91682	1.55158	0.689685	2.2497	0.0244679	0.0808285	UBB
ENSDARG00000002377	357.774	0.313738	0.167931	1.86826	0.0617264	0.163349	mief2
ENSDARG00000002385	587.61	-0.656086	0.227388	-2.88531	0.00391031	0.0184082	atm
ENSDARG00000002391	0.965336	-0.167554	1.7312	-0.0967848	0.922897	NA	tlcd1
ENSDARG00000002396	713.24	0.197356	0.165724	1.19087	0.233705	0.422495	cry-dash
ENSDARG00000002401	555.722	0.887732	0.166618	5.32794	9.93349e-08	1.9399e-06	gale
ENSDARG00000002402	1132.03	0.399776	0.106279	3.76156	0.000168854	0.00131395	ercc3
ENSDARG00000002403	5185.21	0.0847934	0.129852	0.653002	0.513755	0.690547	nusap1
ENSDARG00000002405	27.0313	0.631912	0.490151	1.28922	0.197321	0.378098	si:ch211-225b11.1
ENSDARG00000002406	13.8953	-1.41561	0.574443	-2.46432	0.0137273	0.0510757	zmynd10
ENSDARG00000002411	86.2667	-0.888686	0.320067	-2.77657	0.00549365	0.0244429	pde4cb
ENSDARG00000002445	5226.74	0.414197	0.196452	2.10838	0.0349978	0.106715	prdm1a
ENSDARG00000002463	740.056	-0.231793	0.106903	-2.16826	0.0301391	0.0951042	arhgef37
ENSDARG00000002467	598.947	-0.148031	0.148513	-0.996757	0.318882	0.515394	rdh14b
ENSDARG00000002479	2387.11	-0.00793723	0.125366	-0.0633123	0.949518	0.974763	ercc6l
ENSDARG00000002483	8.41601	-2.34836	0.84019	-2.79503	0.00518942	0.0233041	wnt7ab
ENSDARG00000002487	3337.76	0.162103	0.093202	1.73926	0.0819888	0.201283	noc3l
ENSDARG00000002494	9.50879	-0.739695	0.706689	-1.0467	0.295236	0.48989	itgb6
ENSDARG00000002506	762.992	0.118205	0.142733	0.828157	0.407582	0.600312	zgc:92818
ENSDARG00000002507	183.631	-0.17636	0.192336	-0.916939	0.359175	0.555661	itga10
ENSDARG00000002508	0.116771	1.19519	4.08052	0.292901	0.769597	NA	ankrd33ab
ENSDARG00000002509	45.7795	1.86184	0.40903	4.55184	5.31785e-06	6.43188e-05	zgc:153911
ENSDARG00000002510	12.0382	-1.3551	1.07819	-1.25683	0.208814	0.391533	dmbx1b
ENSDARG00000002523	1636.13	-0.0781988	0.111925	-0.698674	0.484756	0.667469	hsdl2
ENSDARG00000002533	35.9514	-0.435461	0.48438	-0.899007	0.368649	0.564972	adora2b
ENSDARG00000002536	4876.42	0.230895	0.0875445	2.63746	0.00835288	0.0342447	tm9sf4
ENSDARG00000002538	4876.61	0.0484258	0.12497	0.387498	0.698388	0.828235	smu1a
ENSDARG00000002546	37.7981	0.36063	0.321124	1.12302	0.261428	0.45325	rundc3ab
ENSDARG00000002549	111.517	0.698603	0.22983	3.03965	0.00236854	0.0122419	eif3eb
ENSDARG00000002552	6539.98	0.279128	0.0855878	3.26131	0.00110899	0.00651982	mapkapk2a
ENSDARG00000002564	2.61857	1.86609	1.3294	1.40371	0.160405	0.326758	syngr1a
ENSDARG00000002571	976.934	-0.229107	0.108101	-2.11937	0.034059	0.10437	tmod2
ENSDARG00000002576	6.41025	-1.32929	0.829396	-1.60273	0.108995	0.247224	cabp5a
ENSDARG00000002582	41.0616	0.1926	0.330531	0.5827	0.560095	0.728267	tbx15
ENSDARG00000002587	89.2188	0.131026	0.311451	0.420694	0.673978	0.81255	dpysl3
ENSDARG00000002589	2.05625	0.19569	1.40049	0.13973	0.888873	0.942087	mylpfb
ENSDARG00000002591	4590.83	0.137544	0.110127	1.24895	0.211683	0.395013	ruvbl1
ENSDARG00000002593	2.15191	0.972825	1.37498	0.707518	0.479245	0.663305	slc45a2
ENSDARG00000002597	179.241	0.994182	0.171736	5.78902	7.07994e-09	1.78727e-07	pabpc1l
ENSDARG00000002600	2.10459	-0.632572	1.3696	-0.461866	0.644178	0.790923	pcsk1
ENSDARG00000002601	791.205	0.50145	0.166119	3.01861	0.00253933	0.0129774	irx7
ENSDARG00000002607	8.76567	1.00216	0.604521	1.65778	0.0973627	0.227877	unm_sa1614
ENSDARG00000002609	858.787	-1.39354	0.101814	-13.6872	1.21153e-42	1.88915e-39	rnf145a
ENSDARG00000002613	797.634	-0.00226545	0.213597	-0.0106062	0.991538	0.996157	rpa3
ENSDARG00000002632	1094.68	0.0436606	0.142667	0.306031	0.759581	0.86861	anxa11b
ENSDARG00000002634	136.701	-0.65042	0.19148	-3.39681	0.000681775	0.00432153	b4galt1
ENSDARG00000002635	0.840561	1.15393	2.3662	0.487671	0.625783	NA	zgc:85722
ENSDARG00000002642	637.928	-0.114451	0.119212	-0.960064	0.337023	0.533859	sh3gl1b
ENSDARG00000002644	101.625	-0.488327	0.46079	-1.05976	0.289254	0.483847	rgs5a
ENSDARG00000002656	23.1745	-0.149862	0.417381	-0.359053	0.719555	0.842028	stxbp5a
ENSDARG00000002659	11461	0.0957763	0.0755991	1.2669	0.205192	0.38712	mapre1b
ENSDARG00000002663	150.886	0.178885	0.264412	0.676542	0.498697	0.678231	optn
ENSDARG00000002670	466.221	-0.169287	0.120376	-1.40632	0.15963	0.325606	ATG14
ENSDARG00000002682	361.744	0.0738548	0.212743	0.347154	0.728476	0.847408	tbcela
ENSDARG00000002685	61.2028	1.26995	0.315041	4.03106	5.55266e-05	0.000502715	fam113
ENSDARG00000002690	87.9075	-0.120332	0.223001	-0.539603	0.589471	0.750846	rabif
ENSDARG00000002696	2.17481	-0.121011	1.10665	-0.109349	0.912926	0.955222	gnb3b
ENSDARG00000002701	6.19819	-3.03362	0.933165	-3.25089	0.00115044	0.00671482	rasl12
ENSDARG00000002707	477.54	0.0535024	0.171911	0.311221	0.755633	0.865587	her11
ENSDARG00000002710	126374	0.176517	0.0937414	1.88302	0.0596978	0.15948	ncl
ENSDARG00000002720	3820.44	0.0408161	0.0944172	0.432295	0.665527	0.806438	utp15
ENSDARG00000002722	0.741847	0.638413	2.34919	0.271759	0.785808	NA	NA
ENSDARG00000002731	973.659	0.0182488	0.14328	0.127364	0.898652	0.947868	sdc2
ENSDARG00000002732	22.1686	1.02933	0.450522	2.28474	0.0223279	0.0752465	spon2b
ENSDARG00000002745	2440.67	0.0455178	0.0784627	0.58012	0.561834	0.729312	tdh
ENSDARG00000002748	228.203	-0.794963	0.175127	-4.53935	5.64282e-06	6.78846e-05	sema6d
ENSDARG00000002750	769.986	-0.0174221	0.106782	-0.163156	0.870396	0.93171	phf20a
ENSDARG00000002754	129.513	-0.380418	0.240532	-1.58157	0.113749	0.254447	pdcd2l
ENSDARG00000002758	596.596	0.384563	0.176064	2.18422	0.0289459	0.0922001	dedd1
ENSDARG00000002760	2.14997	1.10677	1.40766	0.786245	0.431724	0.621952	gdf5
ENSDARG00000002764	0.331706	1.10433	3.59272	0.307381	0.758553	NA	miox
ENSDARG00000002771	6.20001	0.807776	0.919503	0.878492	0.379677	0.575123	si:ch211-48m9.1
ENSDARG00000002779	15.303	0.311721	0.543379	0.573672	0.56619	0.732901	pdx1
ENSDARG00000002787	1515.37	-0.298306	0.271856	-1.09729	0.272513	0.46581	tle3a
ENSDARG00000002790	1959.54	0.0604057	0.126026	0.479311	0.631718	0.781303	ap2m1a
ENSDARG00000002791	18385.6	0.217119	0.0817059	2.65732	0.00787652	0.032662	atp1a1a.1
ENSDARG00000002792	4147.45	0.529724	0.12186	4.34698	1.38027e-05	0.000149516	arcn1a
ENSDARG00000002795	1115.04	-1.52698	0.292586	-5.21891	1.79978e-07	3.31365e-06	meis3
ENSDARG00000002797	1.2789	2.72635	2.09645	1.30046	0.193444	NA	NA
ENSDARG00000002798	309.578	-0.0768541	0.136909	-0.561352	0.574558	0.739577	cog8
ENSDARG00000002816	86.9884	-2.98198	0.538736	-5.53515	3.10964e-08	6.81464e-07	rasgrf2b
ENSDARG00000002826	631.843	-0.0684235	0.109995	-0.622057	0.533904	0.70673	cep57l1
ENSDARG00000002830	124.738	-0.137855	0.202701	-0.680092	0.496446	0.676353	trmt2a
ENSDARG00000002831	19.8426	0.479801	0.449695	1.06695	0.285995	0.480196	col4a4
ENSDARG00000002840	197.674	-0.666702	0.216964	-3.07287	0.00212007	0.011151	si:dkey-28b4.8
ENSDARG00000002847	5.62312	-1.10283	0.780321	-1.4133	0.157567	0.322468	fndc1
ENSDARG00000002872	303.383	0.0163736	0.149557	0.109481	0.912821	0.955182	zgc:113210
ENSDARG00000002877	590.123	-0.290926	0.257068	-1.13171	0.257757	0.44896	reps1
ENSDARG00000002880	128.61	-0.688156	0.23728	-2.90019	0.0037294	0.0176756	vps50
ENSDARG00000002894	561.442	0.105763	0.110109	0.960527	0.33679	0.53354	aven
ENSDARG00000002897	82.1097	0.157791	0.305023	0.517308	0.604941	0.762794	si:ch211-160o17.2
ENSDARG00000002909	2456.73	0.387965	0.182487	2.12598	0.0335048	0.103108	tjp3
ENSDARG00000002912	874.027	0.366552	0.107554	3.40807	0.000654246	0.0041692	adipor1a
ENSDARG00000002916	1627.43	-0.336057	0.233422	-1.4397	0.149953	0.310936	sec31b
ENSDARG00000002917	1.09965	0.937669	2.39676	0.391223	0.695632	NA	NA
ENSDARG00000002933	6.8746	0.896239	0.677251	1.32335	0.18572	0.362062	gbx2
ENSDARG00000002937	36.7045	-1.07403	0.433009	-2.48039	0.0131237	0.0493473	meis1a
ENSDARG00000002945	23.2526	0.722852	0.446739	1.61806	0.105649	0.241936	bgnb
ENSDARG00000002947	337.72	-0.903413	0.18678	-4.83678	1.31958e-06	1.92026e-05	abcd3b
ENSDARG00000002949	1714.46	0.163076	0.0859467	1.89741	0.0577736	0.155777	ppp6c
ENSDARG00000002952	5799.7	-0.206723	0.0767033	-2.6951	0.00703679	0.0298478	smo
ENSDARG00000002956	7.94062	1.46059	0.753071	1.93951	0.0524395	0.144882	si:dkey-32n7.4
ENSDARG00000002959	0.572186	2.14269	2.57198	0.833091	0.404794	NA	gpr34b
ENSDARG00000002967	367.184	0.981898	0.159602	6.15217	7.64305e-10	2.36538e-08	pdap1b
ENSDARG00000002968	5613.08	0.394571	0.165421	2.38526	0.0170671	0.0608775	a1cf
ENSDARG00000002970	6401.17	0.138127	0.101145	1.36564	0.172052	0.342735	ss18
ENSDARG00000002971	509.848	-0.510727	0.365118	-1.3988	0.161873	0.328643	phc1
ENSDARG00000002986	2.60896	1.07041	1.07351	0.997115	0.318708	0.515195	gda
ENSDARG00000002988	0.125029	0	4.08052	0	1	NA	NA
ENSDARG00000002991	1336.6	-0.254788	0.087734	-2.9041	0.00368313	0.0174849	cep135
ENSDARG00000002994	387.42	-0.153934	0.140989	-1.09181	0.274915	0.468279	itpkca
ENSDARG00000003008	369.165	-0.773417	0.164147	-4.71174	2.45609e-06	3.32582e-05	prkcea
ENSDARG00000003017	361.348	0.274345	0.167384	1.63902	0.101209	0.234443	ube2al
ENSDARG00000003020	1.42826	-2.82949	1.95282	-1.44892	0.147359	NA	lrrc4.2
ENSDARG00000003021	668.894	0.429011	0.142175	3.01748	0.00254885	0.0130145	hdac8
ENSDARG00000003022	141.838	-1.1487	0.349101	-3.29047	0.00100021	0.00598122	limk1b
ENSDARG00000003027	233.403	-0.328788	0.176997	-1.85759	0.0632273	0.166171	scnm1
ENSDARG00000003032	1387.86	0.0196091	0.169317	0.115813	0.907801	0.952092	eif4a1b
ENSDARG00000003035	8839.71	0.222687	0.098573	2.25911	0.0238766	0.0792019	hspa9
ENSDARG00000003041	204.217	-0.921209	0.189119	-4.87106	1.11002e-06	1.65573e-05	CABZ01111496.1
ENSDARG00000003046	231.573	0.228062	0.184715	1.23467	0.216954	0.401523	sorbs2a
ENSDARG00000003054	1.43585	0.696896	2.13747	0.326038	0.744395	NA	tacr3l
ENSDARG00000003058	1209.72	0.0767581	0.0945135	0.812139	0.416712	0.608221	fgfr1op
ENSDARG00000003061	328.482	-0.359518	0.249989	-1.43813	0.150396	0.311694	cd276
ENSDARG00000003068	1286.43	0.174936	0.0984157	1.77752	0.0754827	0.189183	gorasp1a
ENSDARG00000003069	1191.21	0.193087	0.117565	1.64239	0.10051	0.233304	btbd7
ENSDARG00000003077	7.5626	1.27501	0.767236	1.66182	0.0965488	0.2266	si:ch73-111m19.2
ENSDARG00000003081	25.7168	-1.92093	0.410274	-4.68206	2.84e-06	3.76825e-05	NA
ENSDARG00000003084	28.6167	-0.651912	0.453355	-1.43797	0.150442	0.311726	spire2
ENSDARG00000003085	529.676	-0.660611	0.129804	-5.08931	3.59369e-07	6.14748e-06	stambpl1
ENSDARG00000003087	349.661	0.113445	0.13603	0.833967	0.4043	0.597344	ubxn6
ENSDARG00000003091	1571.25	0.0956564	0.150695	0.63477	0.525578	0.700092	oclnb
ENSDARG00000003098	7991.27	-0.218986	0.0955386	-2.29212	0.0218988	0.0741952	kdm5bb
ENSDARG00000003109	198.08	0.189669	0.177709	1.0673	0.285836	0.480093	rcan1a
ENSDARG00000003113	17.3422	-2.05885	0.622401	-3.30792	0.000939903	0.00567385	ada
ENSDARG00000003127	3015.93	-0.110401	0.0785803	-1.40494	0.160038	0.326274	zgc:123105
ENSDARG00000003132	857.807	-0.579121	0.142308	-4.06949	4.71167e-05	0.000435921	apip
ENSDARG00000003142	22.4822	-1.24719	0.425994	-2.92772	0.0034146	0.0164599	dachc
ENSDARG00000003144	172.16	0.488199	0.198748	2.45638	0.0140346	0.0518491	pxmp2
ENSDARG00000003146	0.688882	3.38702	2.44191	1.38704	0.165431	NA	si:dkey-27m7.4
ENSDARG00000003151	4860.8	-0.0837898	0.108539	-0.771979	0.440127	0.629316	skp1
ENSDARG00000003153	3234.27	0.164289	0.125541	1.30865	0.190653	0.368736	nudt21
ENSDARG00000003157	338.929	-0.00898483	0.133104	-0.0675026	0.946182	0.973024	nfkbil1
ENSDARG00000003165	585.847	-0.775853	0.281155	-2.75952	0.00578855	0.0255142	nr2f6b
ENSDARG00000003167	553.735	0.103959	0.133277	0.780023	0.435377	0.625348	mlst8
ENSDARG00000003169	8619.88	-0.100672	0.165556	-0.608083	0.543132	0.714182	magi1b
ENSDARG00000003175	322.685	-0.167242	0.167226	-1.00009	0.317266	0.51364	stx5al
ENSDARG00000003181	0.105988	-0.728386	4.08052	-0.178503	0.858328	NA	sult1st4
ENSDARG00000003189	8899.71	0.0820996	0.100382	0.817871	0.413431	0.605582	psmd1
ENSDARG00000003193	488.403	0.673152	0.18215	3.6956	0.000219367	0.0016494	rassf7b
ENSDARG00000003197	57.7146	-1.77237	0.564666	-3.13879	0.00169645	0.00930429	wdr21
ENSDARG00000003200	1715.29	0.0298661	0.167711	0.17808	0.85866	0.924879	foxm1
ENSDARG00000003203	17.2714	-2.92497	0.856701	-3.41422	0.000639645	0.00409159	NA
ENSDARG00000003205	1857.75	0.225303	0.129611	1.7383	0.0821578	0.201576	ngly1
ENSDARG00000003206	28.1335	0.637301	0.389374	1.63673	0.101686	0.235295	chchd6a
ENSDARG00000003207	322.074	0.596737	0.230563	2.58817	0.00964876	0.0384717	mterf3
ENSDARG00000003208	69.0141	-0.352979	0.281631	-1.25334	0.210083	0.393265	pomk
ENSDARG00000003210	4.36618	-0.529571	0.885209	-0.598244	0.549677	0.719335	NA
ENSDARG00000003213	4813.61	-0.152399	0.0932996	-1.63344	0.102377	0.236527	naa15a
ENSDARG00000003216	100.907	-1.95805	0.459883	-4.25772	2.06526e-05	0.000213161	anxa2a
ENSDARG00000003217	2961.65	-0.412683	0.12979	-3.17963	0.00147463	0.00828498	urb2
ENSDARG00000003219	21.1705	1.06113	0.455955	2.32728	0.0199506	0.0688958	bin2a
ENSDARG00000003229	8.52477	0.432459	0.66942	0.646019	0.518267	0.69446	gdf9
ENSDARG00000003235	2087.11	-0.0675415	0.0978443	-0.690296	0.490008	0.671552	nup88
ENSDARG00000003244	161.621	-0.219122	0.181942	-1.20435	0.228453	0.415426	gbp3
ENSDARG00000003250	19.2811	1.22048	0.4788	2.54903	0.0108023	0.0421751	pik3cd
ENSDARG00000003251	187.333	-0.201666	0.188218	-1.07145	0.283967	0.478051	zbtb22b
ENSDARG00000003257	45.9377	0.164255	0.267245	0.614623	0.538804	0.71038	zgc:101559
ENSDARG00000003269	1251.3	-0.0101214	0.122772	-0.0824407	0.934296	0.967516	clcn3
ENSDARG00000003270	394.528	0.295193	0.179811	1.64168	0.100655	0.233587	dhps
ENSDARG00000003281	831.724	0.915571	0.17296	5.29353	1.19975e-07	2.30741e-06	pik3ip1
ENSDARG00000003287	2529.2	-0.0808277	0.129907	-0.622196	0.533813	0.706729	wdr12
ENSDARG00000003290	16.5089	-1.48756	0.776584	-1.91552	0.0554264	0.151157	dab1b
ENSDARG00000003293	103.158	-0.781538	0.210658	-3.70999	0.000207268	0.00156591	sox9a
ENSDARG00000003303	0.672583	0.71321	2.5617	0.278413	0.780695	NA	stc1
ENSDARG00000003307	763.525	0.191672	0.0959439	1.99775	0.0457434	0.130582	stx16
ENSDARG00000003308	622.076	-0.244747	0.122063	-2.00508	0.0449544	0.128929	emc2
ENSDARG00000003311	386.888	-0.105925	0.159835	-0.662718	0.507511	0.685028	pank2
ENSDARG00000003313	549.945	1.01696	0.181791	5.59412	2.21745e-08	5.02233e-07	eps8l1b
ENSDARG00000003320	371.437	0.363868	0.206019	1.76619	0.0773645	0.192661	fam91a1
ENSDARG00000003326	0.557858	1.64611	3.14195	0.523912	0.60034	NA	cacng5a
ENSDARG00000003328	357.1	0.305212	0.138479	2.20403	0.0275225	0.088477	slf2
ENSDARG00000003344	2.811	0.864318	1.3379	0.646025	0.518263	0.69446	trpc2b
ENSDARG00000003373	294.881	0.18758	0.169534	1.10645	0.268532	0.461346	commd2
ENSDARG00000003375	218.081	-0.653038	0.237588	-2.74862	0.00598471	0.0262532	gng12a
ENSDARG00000003381	9.20575	0.625436	0.620074	1.00865	0.313143	0.509093	si:ch211-266g18.6
ENSDARG00000003382	817.96	0.206897	0.130198	1.58909	0.112041	0.25178	cwc25
ENSDARG00000003383	136.416	0.1578	0.223079	0.70737	0.479337	0.66331	asb8
ENSDARG00000003395	6.83484	1.67391	0.775836	2.15755	0.0309626	0.0970981	col4a3
ENSDARG00000003398	858.275	0.172596	0.0972079	1.77554	0.0758094	0.189861	rbpja
ENSDARG00000003399	1775.74	0.536693	0.130259	4.12021	3.78521e-05	0.000362962	fgf8a
ENSDARG00000003403	93.0654	0.902505	0.37965	2.3772	0.0174444	0.0619076	tenm1
ENSDARG00000003411	1973.85	0.0544432	0.133015	0.4093	0.682319	0.818033	foxa2
ENSDARG00000003414	2.27167	-0.803975	1.23137	-0.652912	0.513813	0.690547	capslb
ENSDARG00000003420	16.9345	-0.908537	0.524799	-1.73121	0.0834145	0.203713	chrna5
ENSDARG00000003421	71.5915	-0.841818	0.311134	-2.70565	0.00681714	0.029111	igf2bp2a
ENSDARG00000003429	6784.25	-0.194092	0.105231	-1.84443	0.0651198	0.169846	hnrnpdl
ENSDARG00000003444	76.7065	-0.672241	0.304155	-2.21019	0.0270917	0.0874625	dhrs7
ENSDARG00000003446	831.934	0.483971	0.119669	4.04425	5.24904e-05	0.000478217	ippk
ENSDARG00000003449	392.81	1.13366	0.369374	3.06913	0.00214684	0.0112522	pde10a
ENSDARG00000003462	183.149	0.43784	0.162289	2.6979	0.00697792	0.0296356	fech
ENSDARG00000003469	3.47085	-1.53311	1.12113	-1.36747	0.171479	0.341862	neurod4
ENSDARG00000003475	0.241801	1.19519	4.08052	0.292901	0.769597	NA	sult1st5
ENSDARG00000003486	7724.01	0.214447	0.0845195	2.53725	0.0111728	0.043288	ppp1caa
ENSDARG00000003487	4831.76	-0.173052	0.124653	-1.38827	0.165056	0.333251	nup93
ENSDARG00000003495	217.091	-0.706213	0.211201	-3.3438	0.000826405	0.00507792	madd
ENSDARG00000003512	74.2061	0.428934	0.319462	1.34267	0.179378	0.353534	anks1b
ENSDARG00000003517	305.35	-0.132188	0.200816	-0.658252	0.510376	0.687583	impa1
ENSDARG00000003519	283.043	0.0876289	0.239376	0.366072	0.714311	0.838565	aprt
ENSDARG00000003520	113.784	-1.06714	0.259429	-4.1134	3.89875e-05	0.000372264	tbc1d14
ENSDARG00000003523	2.20243	-3.69968	1.66161	-2.22656	0.0259767	0.0846853	itln3
ENSDARG00000003526	5584.84	0.46403	0.110075	4.21557	2.49152e-05	0.000251272	psma5
ENSDARG00000003527	5750.78	0.277591	0.0900806	3.08158	0.00205905	0.0108865	mak16
ENSDARG00000003531	5651.55	0.447572	0.105078	4.25944	2.04936e-05	0.000211844	tcea1
ENSDARG00000003533	0.808688	3.90176	2.50707	1.5563	0.119637	NA	col8a1b
ENSDARG00000003544	132.251	0.386064	0.226413	1.70513	0.0881697	0.212005	adarb1b
ENSDARG00000003553	0.337005	-1.72329	4.02954	-0.427664	0.668896	NA	gnrhr2
ENSDARG00000003564	1456.69	-0.0761889	0.10817	-0.704344	0.481218	0.665038	dohh
ENSDARG00000003570	3285.87	1.35263	0.191202	7.07434	1.50165e-12	7.98948e-11	hsp90b1
ENSDARG00000003573	194.198	0.36388	0.183556	1.98239	0.0474352	0.134315	dctn5
ENSDARG00000003576	35.9852	-3.34365	0.49116	-6.80768	9.91878e-12	4.48803e-10	klhl32
ENSDARG00000003584	195.338	0.166759	0.222768	0.748577	0.454112	0.641517	pla2g7
ENSDARG00000003592	246.502	0.689312	0.188484	3.65713	0.000255054	0.00187734	surf1
ENSDARG00000003599	43119.8	-0.315748	0.143007	-2.20792	0.0272496	0.0878603	rpl3
ENSDARG00000003607	2391.83	-0.0733456	0.0972838	-0.753934	0.450889	0.638145	nr2f6a
ENSDARG00000003615	1.12112	-0.771124	2.20975	-0.348964	0.727116	NA	slc26a3.2
ENSDARG00000003616	1323.07	0.125742	0.111892	1.12377	0.26111	0.452776	arih1
ENSDARG00000003631	991.054	-0.144228	0.141901	-1.0164	0.30944	0.505533	clockb
ENSDARG00000003635	229.514	0.232247	0.182743	1.2709	0.203765	0.385705	mogat3b
ENSDARG00000003641	1854.59	0.219321	0.208871	1.05003	0.293705	0.488611	tfg
ENSDARG00000003642	253.844	0.0572346	0.189125	0.302628	0.762173	0.869787	zfyve19
ENSDARG00000003655	318.199	0.433355	0.250068	1.73295	0.0831048	0.20326	tmem59l
ENSDARG00000003675	204.908	1.60076	0.196718	8.13732	4.04138e-16	4.0389e-14	cryl1
ENSDARG00000003680	6.4218	-1.03331	0.714077	-1.44706	0.147881	0.307584	runx1t1
ENSDARG00000003681	10420.9	-0.593319	0.0746789	-7.94493	1.94295e-15	1.71989e-13	eif5
ENSDARG00000003684	3.38756	1.49468	1.08183	1.38162	0.167089	0.335984	obsl1a
ENSDARG00000003693	2869.2	-0.13593	0.0840194	-1.61784	0.105697	0.241973	hars
ENSDARG00000003695	1957.06	-0.3389	0.160956	-2.10554	0.0352439	0.107304	vdac3
ENSDARG00000003697	4.42855	-1.34176	0.856177	-1.56716	0.117078	0.259973	slc5a8l
ENSDARG00000003699	899.395	-0.325652	0.141465	-2.30201	0.0213348	0.0727587	atp7a
ENSDARG00000003701	88.7641	-0.076128	0.199786	-0.381048	0.703167	0.831132	cldng
ENSDARG00000003706	45.4541	0.751309	0.301761	2.48975	0.0127834	0.0482734	ryr2b
ENSDARG00000003732	0.78949	-1.36821	2.29279	-0.596745	0.550677	NA	mitfa
ENSDARG00000003749	1953.45	0.18099	0.106851	1.69385	0.0902932	0.215816	polb
ENSDARG00000003750	10202.4	0.354736	0.103513	3.42698	0.00061034	0.00392768	pfas
ENSDARG00000003751	1946.48	0.403726	0.267064	1.51172	0.130605	0.28111	lats1
ENSDARG00000003754	151.459	-0.364344	0.239237	-1.52294	0.127773	0.276851	tspan2a
ENSDARG00000003757	390.128	-0.00653942	0.185568	-0.03524	0.971888	0.986389	cnpy1
ENSDARG00000003769	50.9069	-0.0980982	0.336966	-0.291122	0.770958	0.87518	tada2b
ENSDARG00000003776	390.891	0.71682	0.131411	5.45479	4.90311e-08	1.02889e-06	pip4k2aa
ENSDARG00000003779	418.591	0.724536	0.226135	3.20399	0.00135535	0.007724	ctnnd2b
ENSDARG00000003789	4011.69	0.645076	0.116874	5.51944	3.40085e-08	7.381e-07	dennd5b
ENSDARG00000003795	2121.85	-0.107173	0.120153	-0.891969	0.37241	0.568757	idh2
ENSDARG00000003797	0.459262	3.08639	3.83629	0.804525	0.421094	NA	asb2a.1
ENSDARG00000003803	0.125029	0	4.08052	0	1	NA	NA
ENSDARG00000003808	196.341	-0.571584	0.251786	-2.27011	0.0232006	0.0775178	aqp3a
ENSDARG00000003811	6607.26	0.865831	0.134552	6.43492	1.23542e-10	4.52045e-09	plxnb2a
ENSDARG00000003818	1419.04	0.250008	0.12825	1.94939	0.0512491	0.142214	prkag1
ENSDARG00000003820	16.0249	0.693403	0.521756	1.32898	0.183855	0.359557	nr1d2a
ENSDARG00000003822	91.6918	-0.645649	0.299189	-2.158	0.030928	0.0970048	ankrd16
ENSDARG00000003827	799.211	0.0347467	0.125034	0.277898	0.78109	0.881499	snapc1b
ENSDARG00000003829	1723.99	-0.266241	0.0913335	-2.91504	0.0035564	0.0169907	galnt2
ENSDARG00000003835	3581.32	0.719773	0.125891	5.71744	1.08143e-08	2.60351e-07	stom
ENSDARG00000003841	81.4315	0.702525	0.305283	2.30123	0.0213788	0.0728841	usb1
ENSDARG00000003845	212.013	0.459017	0.187538	2.4476	0.0143813	0.0528985	chm
ENSDARG00000003846	471.843	0.407469	0.135236	3.01303	0.00258651	0.0131571	mrpl21
ENSDARG00000003854	7085.74	0.522913	0.118474	4.41375	1.01597e-05	0.000113783	acsl1b
ENSDARG00000003860	16796.9	0.0930468	0.0934988	0.995166	0.319656	0.516231	cbx3a
ENSDARG00000003865	131.671	0.623289	0.24139	2.58209	0.00982048	0.03898	pard6b
ENSDARG00000003866	7325.06	0.289045	0.088809	3.25468	0.00113519	0.00664492	tm9sf2
ENSDARG00000003867	24.1857	0.607861	0.495194	1.22752	0.219627	0.40488	cdk20
ENSDARG00000003869	238.973	0.815857	0.189738	4.29991	1.70871e-05	0.000181062	decr1
ENSDARG00000003872	224.923	-0.598407	0.193251	-3.09653	0.001958	0.0104808	ccdc102a
ENSDARG00000003877	59.608	-0.0522331	0.312356	-0.167223	0.867194	0.929559	pbrm1
ENSDARG00000003899	156.385	0.0214685	0.174214	0.123231	0.901924	0.949297	zdhhc23b
ENSDARG00000003900	46.2891	0.925574	0.31988	2.8935	0.00380973	0.01801	gpr61l
ENSDARG00000003902	61.4961	1.73914	0.362357	4.79953	1.5904e-06	2.26557e-05	ctsl.1
ENSDARG00000003903	0.189004	-1.57827	4.04229	-0.390438	0.696212	NA	NA
ENSDARG00000003904	65.5384	0.71001	0.337042	2.10659	0.035153	0.107107	sycp1
ENSDARG00000003909	3.03459	2.88239	1.46664	1.9653	0.0493791	0.138561	ftr01
ENSDARG00000003910	3093.58	-0.25286	0.258525	-0.978086	0.328032	0.524624	med13b
ENSDARG00000003920	34180.7	0.0875686	0.0835424	1.04819	0.294549	0.489279	setb
ENSDARG00000003925	2.46001	-0.830857	1.38811	-0.598553	0.549471	0.719323	cx28.6
ENSDARG00000003927	2950.85	-0.181452	0.103841	-1.7474	0.0805686	0.198639	cldn12
ENSDARG00000003931	4550.37	0.858035	0.191425	4.48235	7.38253e-06	8.55639e-05	cndp2
ENSDARG00000003934	120.513	-0.159069	0.195348	-0.814285	0.415482	0.607231	nxnl2
ENSDARG00000003938	5897.4	-0.254345	0.122778	-2.07159	0.0383041	0.114035	rpa1
ENSDARG00000003940	995.038	-0.380694	0.103106	-3.69225	0.000222279	0.00166882	mtfr1l
ENSDARG00000003941	5523.93	0.0769755	0.0792147	0.971732	0.331184	0.527993	rrs1
ENSDARG00000003952	5435.06	0.0823171	0.140881	0.584302	0.559017	0.727379	pfn2
ENSDARG00000003961	263.224	0.557856	0.280581	1.98822	0.0467875	0.132941	parp3
ENSDARG00000003963	245.145	-0.168427	0.265945	-0.633316	0.526527	0.700711	traf4a
ENSDARG00000003965	0.568829	1.06613	3.18817	0.334402	0.738076	NA	tlx1
ENSDARG00000003968	49.5579	1.06985	0.289436	3.69631	0.000218752	0.00164539	larp6b
ENSDARG00000003971	83.8773	-1.59163	0.31846	-4.99791	5.7955e-07	9.30171e-06	isl2a
ENSDARG00000003973	125.039	-0.353029	0.288196	-1.22496	0.220589	0.405841	chordc1a
ENSDARG00000003974	1011.19	-0.359386	0.106951	-3.36028	0.000778646	0.00482542	spoplb
ENSDARG00000003977	58.9095	0.0481836	0.268991	0.179127	0.857838	0.924622	zgc:153896
ENSDARG00000003984	2886.45	0.171203	0.0852936	2.00722	0.0447267	0.128512	LTN1
ENSDARG00000003989	4.00499	-0.451922	1.01031	-0.447312	0.65465	0.798244	crhr1
ENSDARG00000003991	5.17839	2.0351	1.15667	1.75946	0.0785001	0.194747	fhl2b
ENSDARG00000003994	7.67356	-0.143307	0.805736	-0.177858	0.858834	0.925	syt9a
ENSDARG00000003998	0.847782	-0.188624	2.05834	-0.0916389	0.926985	NA	phyhipla
ENSDARG00000004015	3.43747	0.954648	1.06075	0.899977	0.368132	0.564648	adcyap1a
ENSDARG00000004017	994.914	0.908687	0.149493	6.07847	1.21337e-09	3.61179e-08	spag1a
ENSDARG00000004018	48.0375	-0.449236	0.28282	-1.58842	0.112192	0.252051	CHST13
ENSDARG00000004023	55.084	-1.74541	0.404118	-4.31906	1.56696e-05	0.000167091	isl1
ENSDARG00000004034	205.035	-0.163959	0.284034	-0.577252	0.563769	0.730935	arhgdig
ENSDARG00000004037	1140.08	0.179353	0.12025	1.4915	0.13583	0.288899	cog2
ENSDARG00000004046	1010.18	-0.144891	0.106172	-1.36468	0.172355	0.343067	phf6
ENSDARG00000004049	2640.61	-0.223381	0.144101	-1.55017	0.1211	0.266423	marcksa
ENSDARG00000004051	3.01987	0.623365	1.32473	0.47056	0.637955	0.786383	CR354540.1
ENSDARG00000004055	598.664	-0.153173	0.164215	-0.932758	0.350945	0.54829	uhrf1bp1l
ENSDARG00000004059	138.027	-0.510476	0.327942	-1.5566	0.119565	0.264135	galk2
ENSDARG00000004060	94.1812	-1.16366	0.293544	-3.96418	7.36501e-05	0.000641307	bhlhe40
ENSDARG00000004074	317.167	0.331569	0.222177	1.49237	0.135603	0.288558	bach2b
ENSDARG00000004078	4786.47	0.325682	0.114354	2.84801	0.00439932	0.0202912	acsl4a
ENSDARG00000004094	2231.67	0.98459	0.195183	5.04446	4.54814e-07	7.55038e-06	acsbg2
ENSDARG00000004105	177.726	-0.490547	0.332688	-1.4745	0.140348	0.296088	tie1
ENSDARG00000004111	8.22844	-0.109375	0.81363	-0.134429	0.893064	0.944454	esr1
ENSDARG00000004114	960.243	-0.248573	0.126819	-1.96006	0.0499889	0.139893	tti1
ENSDARG00000004115	92.1402	0.909908	0.242611	3.75048	0.0001765	0.00136454	mgat4b
ENSDARG00000004130	73.8987	-0.0886081	0.262001	-0.338198	0.735214	0.851776	mvk
ENSDARG00000004131	302.682	0.266783	0.236079	1.13006	0.258452	0.44978	rttn
ENSDARG00000004132	3667.29	-0.21125	0.139473	-1.51463	0.129866	0.280054	usp19
ENSDARG00000004141	10.2692	-2.32063	1.03996	-2.23145	0.0256514	0.0838002	zgc:92630
ENSDARG00000004150	18.8791	1.90196	0.634209	2.99894	0.00270916	0.0136475	grm2a
ENSDARG00000004151	225.999	0.0338355	0.161462	0.209557	0.834014	0.910587	rab23
ENSDARG00000004154	50.9383	-0.300541	0.275731	-1.08998	0.275721	0.469085	orai1b
ENSDARG00000004158	3.63174	-0.0290595	1.1285	-0.0257507	0.979456	0.9904	tmem63c
ENSDARG00000004160	2468.66	0.00785482	0.135387	0.0580174	0.953735	0.977459	reep3b
ENSDARG00000004161	3994.54	0.00333725	0.0938828	0.035547	0.971644	0.986289	ik
ENSDARG00000004167	28.2167	0.146146	0.381905	0.382676	0.70196	0.830382	zgc:110366
ENSDARG00000004169	3751.94	0.0779491	0.11504	0.677581	0.498038	0.677842	stmn1a
ENSDARG00000004171	2734.28	0.073507	0.167526	0.438779	0.660822	0.802946	rabac1
ENSDARG00000004173	8349.51	0.303027	0.0837735	3.61721	0.000297793	0.00214138	copa
ENSDARG00000004174	13482.3	-0.395666	0.257613	-1.53589	0.124565	0.271891	cnot1
ENSDARG00000004176	163.454	-0.984008	0.187492	-5.24828	1.53527e-07	2.88696e-06	ulk4
ENSDARG00000004177	219.405	1.04332	0.359603	2.9013	0.00371617	0.0176212	fam169ab
ENSDARG00000004184	808.475	-0.229303	0.142138	-1.61325	0.106691	0.243578	nf1b
ENSDARG00000004187	5.23367	0.791266	0.786612	1.00592	0.314455	0.510395	zgc:122979
ENSDARG00000004189	4024.41	0.106035	0.0967504	1.09596	0.273095	0.46634	cbx1a
ENSDARG00000004196	259.7	-0.672683	0.178029	-3.7785	0.000157779	0.00123966	tnfsf10l
ENSDARG00000004199	0.443895	1.70279	3.26249	0.521928	0.60172	NA	spam1
ENSDARG00000004204	16.0427	-0.758392	0.453097	-1.6738	0.0941705	0.222694	efhc2
ENSDARG00000004211	203.647	-0.347077	0.181919	-1.90787	0.0564085	0.153155	ccdc106a
ENSDARG00000004218	289.93	0.217438	0.221448	0.981892	0.326153	0.52278	rnd1b
ENSDARG00000004219	5.29889	-0.136717	0.889812	-0.153647	0.877888	0.93563	slc6a3
ENSDARG00000004227	7.82786	0.417868	0.657535	0.635507	0.525097	0.699727	pde3a
ENSDARG00000004232	158.967	-0.993666	0.246368	-4.03326	5.50073e-05	0.000498682	dlb
ENSDARG00000004243	4.42203	-2.18451	1.03968	-2.10114	0.0356287	0.108147	asic4b
ENSDARG00000004246	880.229	-1.17251	0.149005	-7.86891	3.57752e-15	2.99669e-13	slit2
ENSDARG00000004251	715.965	-0.313402	0.172427	-1.81759	0.0691262	0.177757	dhfr
ENSDARG00000004256	1333.5	0.906977	0.143563	6.31761	2.65633e-10	9.26791e-09	wnt11
ENSDARG00000004260	1.49706	3.31002	1.88949	1.7518	0.0798077	NA	cul5b
ENSDARG00000004261	3418.1	0.326146	0.121501	2.68431	0.00726788	0.0306039	tmed9
ENSDARG00000004262	9.13078	0.743547	0.70734	1.05119	0.293172	0.487883	cyp46a1.2
ENSDARG00000004270	487.803	0.711255	0.119833	5.93539	2.93144e-09	8.10685e-08	atl3
ENSDARG00000004274	55.3388	0.0367894	0.292287	0.125868	0.899837	0.94857	zgc:112496
ENSDARG00000004280	4082.99	0.231824	0.128676	1.80162	0.0716059	0.181869	seh1l
ENSDARG00000004282	598.519	0.493864	0.163457	3.02138	0.00251627	0.0128904	zgc:77375
ENSDARG00000004291	55.787	0.330234	0.293087	1.12675	0.25985	0.451055	hecw1b
ENSDARG00000004296	36.8656	-0.288565	0.500378	-0.576693	0.564147	0.731144	ambp
ENSDARG00000004297	1695.51	-0.315221	0.113193	-2.78481	0.00535587	0.0239191	irf2bpl
ENSDARG00000004301	0.46322	-0.728389	2.87959	-0.252948	0.800308	NA	NA
ENSDARG00000004302	17.1421	0.768828	0.444369	1.73016	0.083602	0.203999	slc45a1
ENSDARG00000004305	0.893926	1.16127	2.1913	0.529943	0.596151	NA	vangl1
ENSDARG00000004306	134.225	-0.0422443	0.206827	-0.20425	0.838158	0.913146	klhl18
ENSDARG00000004307	36.2552	-0.786193	0.406908	-1.93212	0.0533452	0.146748	lypd6
ENSDARG00000004308	392.476	-0.0871318	0.12912	-0.674814	0.499794	0.679088	fam8a1b
ENSDARG00000004311	89.2857	-0.372799	0.212365	-1.75546	0.0791802	0.195937	ldlrap1a
ENSDARG00000004318	68.0114	0.853972	0.286808	2.97751	0.00290604	0.0144101	cbwd
ENSDARG00000004322	16.9788	0.0241083	0.517823	0.0465571	0.962866	0.982129	ush1ga
ENSDARG00000004325	177.63	0.206959	0.211597	0.978079	0.328035	0.524624	casp9
ENSDARG00000004328	664.499	-0.00126661	0.138037	-0.00917588	0.992679	0.996415	LIN28A
ENSDARG00000004336	561.947	0.567991	0.139427	4.07377	4.62589e-05	0.000429947	exoc4
ENSDARG00000004343	2051.96	0.100056	0.0981696	1.01922	0.3081	0.504116	nelfe
ENSDARG00000004358	0.991209	0.830385	1.89187	0.438923	0.660717	NA	gnb3a
ENSDARG00000004363	206.477	-0.201549	0.15848	-1.27176	0.203458	0.385268	lhfpl6
ENSDARG00000004372	917.04	-0.40987	0.112514	-3.64283	0.000269654	0.00196978	fmnl3
ENSDARG00000004377	18.0636	0.392069	0.447072	0.876971	0.380502	0.575672	ppp1r13ba
ENSDARG00000004378	29.9782	-1.00898	0.382629	-2.63696	0.00836536	0.034283	yrk
ENSDARG00000004386	10.8247	-0.163097	0.750569	-0.217298	0.827976	0.907976	si:dkey-153k10.9
ENSDARG00000004392	75.2268	1.65352	0.282256	5.85823	4.6784e-09	1.23645e-07	hdr
ENSDARG00000004396	403.643	-0.834729	0.176754	-4.72255	2.3291e-06	3.18362e-05	b3gnt5b
ENSDARG00000004402	180.702	1.00374	0.261676	3.8358	0.000125156	0.001014	elovl6
ENSDARG00000004405	314.248	1.25526	0.229575	5.46776	4.5575e-08	9.63348e-07	snx10a
ENSDARG00000004406	234.194	0.018964	0.218707	0.0867099	0.930902	0.966077	spra
ENSDARG00000004415	255.669	-0.714274	0.148522	-4.80922	1.51524e-06	2.16458e-05	tcf7l2
ENSDARG00000004427	1021.35	-0.0258674	0.134437	-0.192412	0.847419	0.918964	dpy30
ENSDARG00000004433	37.1408	-0.314073	0.375286	-0.836892	0.402654	0.596128	btk
ENSDARG00000004436	849.902	-0.0251403	0.122992	-0.204405	0.838037	0.913129	fam92a1
ENSDARG00000004445	1.95932	0.408428	1.26959	0.3217	0.74768	NA	grm5a
ENSDARG00000004447	147.695	-3.38939	0.850497	-3.98519	6.7427e-05	0.000592977	aplnr2
ENSDARG00000004451	88.2065	-0.321873	0.212987	-1.51124	0.130728	0.281345	tnfrsfa
ENSDARG00000004452	9217.32	-0.0579425	0.1173	-0.493966	0.62133	0.774028	tardbpl
ENSDARG00000004455	1.75573	0.464479	1.43862	0.322864	0.746798	NA	p2rx5
ENSDARG00000004459	0.594177	0.233404	2.7795	0.0839733	0.933078	NA	unc119.2
ENSDARG00000004460	493.454	0.453826	0.15966	2.84246	0.00447674	0.0206152	desi2
ENSDARG00000004470	721.409	0.339434	0.153926	2.20517	0.027442	0.0883349	prkcsh
ENSDARG00000004472	99.2522	-0.818675	0.234363	-3.4932	0.000477273	0.00319642	atat1
ENSDARG00000004473	0.247503	0	4.08052	0	1	NA	NA
ENSDARG00000004492	233.667	1.27649	0.175518	7.27274	3.52268e-13	2.09275e-11	pcyt1ab
ENSDARG00000004497	7.19455	-0.326583	0.73007	-0.447331	0.654636	0.798244	tspan33a
ENSDARG00000004498	0.108947	1.19519	4.08052	0.292901	0.769597	NA	NA
ENSDARG00000004502	237.259	-0.0437306	0.172801	-0.253069	0.800215	0.892627	rcor3
ENSDARG00000004517	3633.19	0.371603	0.122067	3.04427	0.00233249	0.0120833	ppat
ENSDARG00000004525	717.938	0.235669	0.130468	1.80634	0.0708646	0.180646	zgc:63882
ENSDARG00000004527	189.489	-0.337164	0.175108	-1.92547	0.0541712	0.148565	pin4
ENSDARG00000004529	165.679	0.0360551	0.237869	0.151575	0.879522	0.936681	zgc:173742
ENSDARG00000004537	4951.57	-0.266404	0.264199	-1.00835	0.313289	0.509159	kmt2a
ENSDARG00000004539	531.478	0.018875	0.244245	0.0772789	0.938402	0.969736	ptgs2a
ENSDARG00000004561	2.47185	-1.4734	1.37574	-1.07099	0.284174	0.478208	prkcg
ENSDARG00000004574	204.88	-0.821474	0.178842	-4.59329	4.36309e-06	5.45445e-05	gtf3c2
ENSDARG00000004576	1383.45	0.0436975	0.123572	0.353621	0.723623	0.844554	plk4
ENSDARG00000004577	0.429037	-1.30917	3.30849	-0.395701	0.692326	NA	zgc:194665
ENSDARG00000004580	0.917639	2.74274	2.34988	1.16718	0.243137	NA	NA
ENSDARG00000004581	1926.34	0.553429	0.159089	3.47874	0.000503784	0.00334085	sel1l
ENSDARG00000004586	10.8242	5.04902	1.12227	4.49895	6.8291e-06	8.01115e-05	ntrk1
ENSDARG00000004587	640.035	0.00397135	0.118902	0.0334	0.973356	0.987236	kat5a
ENSDARG00000004588	354.67	-2.35348	0.760919	-3.09295	0.00198178	0.0105718	sox4a
ENSDARG00000004592	0.919288	1.72326	2.06796	0.833317	0.404666	NA	gpr22a
ENSDARG00000004594	685.887	-0.169787	0.197491	-0.859722	0.389942	0.584049	znf800a
ENSDARG00000004597	434.771	-0.0504249	0.278223	-0.181239	0.85618	0.923761	lrrc4ba
ENSDARG00000004616	763.236	-0.0808145	0.0973796	-0.829892	0.4066	0.599475	mtmr2
ENSDARG00000004618	43.2785	-0.183832	0.295077	-0.622997	0.533286	0.706275	stx2a
ENSDARG00000004621	400.699	-0.0449061	0.216331	-0.20758	0.835557	0.911575	gpm6ab
ENSDARG00000004627	2.85329	-1.23484	1.10052	-1.12205	0.261841	0.453756	panx3
ENSDARG00000004632	461.867	-0.27727	0.163887	-1.69183	0.0906776	0.216607	egln1b
ENSDARG00000004633	1.05349	-2.00183	2.19635	-0.911434	0.362067	NA	epn3b
ENSDARG00000004634	898.648	0.346959	0.144853	2.39525	0.0166092	0.0596325	osbp
ENSDARG00000004635	463.98	-1.11932	0.2248	-4.97919	6.38498e-07	1.01673e-05	epha7
ENSDARG00000004636	2348.02	0.0634458	0.122968	0.515956	0.605885	0.76342	ccdc9
ENSDARG00000004643	8.40458	-1.90178	0.87739	-2.16754	0.0301937	0.0952241	cdhr1a
ENSDARG00000004647	470.655	0.359819	0.142228	2.52988	0.0114101	0.044073	spice1
ENSDARG00000004658	14.3687	1.5346	0.672607	2.28157	0.022515	0.0757137	NA
ENSDARG00000004672	552.764	-0.2404	0.13937	-1.7249	0.0845449	0.205676	ptk2ab
ENSDARG00000004680	771.276	0.166557	0.112383	1.48205	0.138326	0.292786	dnajb6a
ENSDARG00000004687	196.292	-0.0210864	0.158769	-0.132812	0.894342	0.945362	acaa1
ENSDARG00000004692	943.077	-0.0394558	0.14475	-0.272579	0.785177	0.883814	nabp1a
ENSDARG00000004695	418.659	0.233529	0.142303	1.64107	0.100782	0.233774	six4a
ENSDARG00000004696	228.609	0.473083	0.160469	2.94812	0.0031971	0.0156436	eefsec
ENSDARG00000004697	132.152	0.218142	0.187144	1.16563	0.243762	0.4336	rxrgb
ENSDARG00000004706	979.631	0.156739	0.12397	1.26432	0.206114	0.388374	syf2
ENSDARG00000004712	5.02215	0.441431	0.853186	0.517391	0.604883	0.762773	tbr1b
ENSDARG00000004713	2106.07	0.20992	0.124416	1.68724	0.0915574	0.218105	mad2l1
ENSDARG00000004714	497.023	-1.38416	0.265006	-5.22311	1.75945e-07	3.24825e-06	tcf12
ENSDARG00000004721	1288.67	-0.512241	0.244158	-2.09799	0.0359061	0.108684	mpp5b
ENSDARG00000004724	4.80243	-0.157647	0.973539	-0.161932	0.87136	0.932151	tcea3
ENSDARG00000004726	1380.16	0.0859661	0.0975491	0.88126	0.378177	0.573913	trappc11
ENSDARG00000004735	56048.4	0.291534	0.105107	2.7737	0.00554225	0.0246321	hnrnpub
ENSDARG00000004745	2250.11	-4.02902e-06	0.105839	-3.80675e-05	0.99997	0.99997	lmbr1l
ENSDARG00000004748	3686.2	1.66844	0.296375	5.62948	1.8075e-08	4.16363e-07	zgc:100868
ENSDARG00000004753	7.42488	-1.25079	0.656435	-1.90543	0.0567242	0.153806	mylkb
ENSDARG00000004754	2768.48	0.0612787	0.100765	0.608132	0.5431	0.714182	hspa4a
ENSDARG00000004757	40506.3	0.0563181	0.0886363	0.635384	0.525178	0.699789	ybx1
ENSDARG00000004763	0.460478	2.06908	2.85426	0.724908	0.468508	NA	NA
ENSDARG00000004771	322.417	-0.122207	0.13431	-0.909884	0.362884	0.559597	ankrd10b
ENSDARG00000004774	3458.54	-0.0401698	0.0999058	-0.402077	0.687627	0.821912	wdr36
ENSDARG00000004782	499.703	-0.70518	0.220343	-3.20037	0.00137251	0.00781083	fgfr3
ENSDARG00000004785	2546.01	0.037799	0.093997	0.402129	0.687589	0.821912	cops2
ENSDARG00000004789	60.2736	-0.0908575	0.280116	-0.324356	0.745668	0.858478	lrp1ba
ENSDARG00000004794	14.291	-0.329029	0.488659	-0.673331	0.500737	0.679777	ccdc146
ENSDARG00000004796	490.337	0.247563	0.136276	1.81663	0.0692736	0.177975	mgrn1b
ENSDARG00000004806	2317.52	-0.0111941	0.112042	-0.0999105	0.920415	0.959792	grwd1
ENSDARG00000004823	20.2533	0.137052	0.447906	0.305984	0.759617	0.86861	asz1
ENSDARG00000004830	2906.38	-0.50098	0.120815	-4.14668	3.37337e-05	0.000328674	flot2a
ENSDARG00000004836	1613.74	-0.0739312	0.135318	-0.546351	0.584825	0.747665	dnajc5ab
ENSDARG00000004840	314.164	-0.410897	0.148317	-2.77039	0.00559894	0.0248188	rassf1
ENSDARG00000004843	1192.13	-0.493638	0.141912	-3.47848	0.000504266	0.00334161	foxp1a
ENSDARG00000004851	176.965	0.125983	0.183432	0.686809	0.492203	0.673152	hinfp
ENSDARG00000004861	85.1034	-3.09162	0.310953	-9.94241	2.72156e-23	6.49043e-21	esrrga
ENSDARG00000004864	2.08951	-0.245554	1.34719	-0.182271	0.85537	0.923329	zgc:171734
ENSDARG00000004866	870.073	0.0869808	0.119629	0.72709	0.467171	0.653195	mindy1
ENSDARG00000004869	8.54827	-3.02007	0.99627	-3.03138	0.00243441	0.0125489	penka
ENSDARG00000004870	1580.48	0.370088	0.194214	1.90557	0.0567064	0.153779	psen1
ENSDARG00000004871	2.82629	0.666204	1.10844	0.60103	0.54782	0.71825	mst1rb
ENSDARG00000004874	442.857	-1.35342	0.270041	-5.01193	5.38865e-07	8.73168e-06	spata6l
ENSDARG00000004875	165.484	0.951091	0.187093	5.08353	3.70486e-07	6.33181e-06	tmc6b
ENSDARG00000004877	2289.82	-0.707341	0.119191	-5.93451	2.94731e-09	8.13964e-08	rock2b
ENSDARG00000004880	213.7	0.0736826	0.242157	0.304276	0.760918	0.869234	acsm3
ENSDARG00000004889	258.268	-0.41173	0.188317	-2.18636	0.028789	0.0918305	aga
ENSDARG00000004891	266.876	0.308179	0.161186	1.91195	0.0558827	0.152054	pex19
ENSDARG00000004898	3.51018	-0.75951	0.930815	-0.815962	0.414522	0.606611	zp2l2
ENSDARG00000004904	20.3772	0.721139	0.447972	1.60979	0.107444	0.244775	gys2
ENSDARG00000004906	2535.16	0.237316	0.078778	3.01246	0.00259137	0.0131752	stip1
ENSDARG00000004925	102.934	1.01925	0.249744	4.08116	4.48111e-05	0.000418794	immp2l
ENSDARG00000004930	936.366	0.0546304	0.136097	0.401409	0.688119	0.822107	lmo7a
ENSDARG00000004931	1.24158	1.78334	1.81307	0.983604	0.32531	NA	slc8a3
ENSDARG00000004932	7.17616	-1.20585	0.836812	-1.44101	0.149582	0.310356	anos1b
ENSDARG00000004937	5173.26	0.329582	0.133712	2.46486	0.0137066	0.0510278	skp2
ENSDARG00000004939	1467.58	-0.139246	0.101861	-1.36702	0.171618	0.342005	mtdhb
ENSDARG00000004948	2175.58	-0.256459	0.0828492	-3.0955	0.00196482	0.0105006	bccip
ENSDARG00000004952	0.643628	2.4056	2.93813	0.818751	0.412929	NA	rsad2
ENSDARG00000004953	11.138	-0.628759	0.613282	-1.02524	0.305251	0.500667	mxb
ENSDARG00000004954	64.7236	-3.03387	0.388766	-7.80386	6.00417e-15	4.77297e-13	grna
ENSDARG00000004956	1702.51	0.392491	0.104751	3.74689	0.000179043	0.00138052	zmat2
ENSDARG00000004964	5.20505	-1.59008	1.26814	-1.25387	0.209891	0.393007	cyp4t8
ENSDARG00000004979	410.082	0.197292	0.172918	1.14095	0.253889	0.444294	elovl5
ENSDARG00000004988	6.37257	-1.25935	0.750692	-1.67759	0.0934267	0.221322	ppp3ca
ENSDARG00000005002	238.642	-1.3118	0.19206	-6.83018	8.48062e-12	3.8982e-10	brf1b
ENSDARG00000005004	109.962	-0.956803	0.311688	-3.06974	0.00214243	0.0112336	slc5a12
ENSDARG00000005010	296.712	-0.303745	0.156884	-1.93611	0.0528544	0.145634	si:dkeyp-2e4.8
ENSDARG00000005015	1340.71	-0.0957123	0.127959	-0.74799	0.454466	0.641717	tspy
ENSDARG00000005023	1000.48	-1.13965	0.222885	-5.11317	3.16791e-07	5.4886e-06	fkbp9
ENSDARG00000005026	81.9085	0.290722	0.266662	1.09022	0.275614	0.469082	tshz1
ENSDARG00000005034	177.195	0.837224	0.166375	5.03216	4.84988e-07	7.95403e-06	ispd
ENSDARG00000005049	27.5294	-0.558666	0.349314	-1.59932	0.109749	0.248322	rab20
ENSDARG00000005057	1537.03	0.298188	0.114121	2.61291	0.00897759	0.0362159	dimt1l
ENSDARG00000005058	31443.9	-0.110221	0.111973	-0.984352	0.324943	0.521528	ncapd2
ENSDARG00000005078	1047.37	-0.071155	0.0889669	-0.799792	0.423831	0.614643	eif4e3
ENSDARG00000005085	3.69212	-2.43919	1.40993	-1.73001	0.0836286	0.203999	ggctb
ENSDARG00000005092	147.839	-0.303898	0.236934	-1.28263	0.199623	0.380687	cep89
ENSDARG00000005095	6.26499	-0.980213	0.783751	-1.25067	0.211055	0.39435	glcea
ENSDARG00000005098	1441.38	0.662695	0.14416	4.59695	4.28729e-06	5.37794e-05	zgc:86764
ENSDARG00000005104	625.351	1.09646	0.150054	7.30707	2.73021e-13	1.67168e-11	limk2
ENSDARG00000005108	2923.6	0.0924444	0.117742	0.785145	0.432369	0.622526	oclna
ENSDARG00000005112	161.247	1.98259	0.335116	5.91613	3.29603e-09	8.95628e-08	cdh17
ENSDARG00000005115	1436.44	0.201164	0.099376	2.02427	0.0429424	0.124676	calub
ENSDARG00000005122	11317.2	0.348859	0.148799	2.34449	0.0190529	0.0664068	atp2a2b
ENSDARG00000005126	690.243	-0.947228	0.130073	-7.28227	3.28244e-13	1.96859e-11	large1
ENSDARG00000005128	645.402	-0.510303	0.262758	-1.94211	0.0521243	0.144247	rnaseh2b
ENSDARG00000005134	3455.73	0.152074	0.090557	1.67932	0.0930896	0.220833	psmd11b
ENSDARG00000005139	68.1611	-1.4658	0.271944	-5.39008	7.04264e-08	1.43315e-06	hhatlb
ENSDARG00000005141	0.530434	0.129742	3.19558	0.0406004	0.967614	NA	camkvb
ENSDARG00000005150	91.1064	4.03488	0.470716	8.57181	1.01873e-17	1.30701e-15	tbx20
ENSDARG00000005154	264.15	0.636317	0.185413	3.43189	0.00059939	0.00387074	aspa
ENSDARG00000005159	101.724	-0.175836	0.209933	-0.837579	0.402267	0.595701	cyth1a
ENSDARG00000005162	16409.9	0.308565	0.0950877	3.24505	0.00117429	0.00682846	tpm3
ENSDARG00000005163	436.187	-0.385682	0.192233	-2.00633	0.0448211	0.128656	efr3a
ENSDARG00000005172	551.317	0.240605	0.148957	1.61527	0.106253	0.242824	dynll2b
ENSDARG00000005176	133.889	-0.186239	0.460025	-0.404845	0.685591	0.820596	zgc:101040
ENSDARG00000005179	16.3326	0.0969834	0.498001	0.194745	0.845592	0.91782	dglucy
ENSDARG00000005185	1567.42	0.464896	0.0971646	4.78462	1.71308e-06	2.41655e-05	cpn1
ENSDARG00000005186	353.775	-0.74592	0.199171	-3.74513	0.0001803	0.00138915	sp4
ENSDARG00000005191	2091.95	0.322509	0.139445	2.3128	0.0207337	0.0712	ahcy
ENSDARG00000005210	1222.14	-0.231025	0.191264	-1.20788	0.227092	0.413998	coro2a
ENSDARG00000005216	68.5558	-1.17817	0.395927	-2.97574	0.00292287	0.0144842	NA
ENSDARG00000005218	99.4508	-0.163109	0.242775	-0.671851	0.501678	0.680656	wrnip1
ENSDARG00000005220	61.1507	1.21355	0.301746	4.02175	5.77667e-05	0.000517628	pdcd6
ENSDARG00000005221	0.852863	1.00615	1.95389	0.514944	0.606592	NA	desmb
ENSDARG00000005230	7308.54	0.671478	0.108662	6.17952	6.42972e-10	2.02073e-08	ssr2
ENSDARG00000005232	189.213	-0.207535	0.194475	-1.06716	0.285902	0.480159	ccdc85ca
ENSDARG00000005236	11319.3	-0.397144	0.273561	-1.45176	0.14657	0.305922	srcap
ENSDARG00000005246	345.157	-0.200319	0.123365	-1.6238	0.104419	0.240124	asb3
ENSDARG00000005251	1740.7	0.439799	0.0840673	5.23152	1.68123e-07	3.1209e-06	rpe
ENSDARG00000005254	7939.74	0.7424	0.193363	3.83941	0.000123332	0.00100243	kdelr2a
ENSDARG00000005271	158.31	-0.311414	0.197051	-1.58037	0.114022	0.254917	zc3h12a
ENSDARG00000005274	476.273	0.206898	0.112466	1.83965	0.06582	0.171231	rad52
ENSDARG00000005284	77.6701	1.00762	0.307708	3.27461	0.00105809	0.00626763	fbxl15
ENSDARG00000005314	0.12024	1.19519	4.08052	0.292901	0.769597	NA	si:dkeyp-80c12.5
ENSDARG00000005315	8864.27	-0.286486	0.165408	-1.732	0.0832742	0.203504	celf1
ENSDARG00000005318	1203.22	0.041846	0.0931843	0.449067	0.653384	0.797443	stam2
ENSDARG00000005320	2212.52	-0.379696	0.254566	-1.49154	0.135819	0.288899	nipsnap1
ENSDARG00000005327	0.105988	-0.728386	4.08052	-0.178503	0.858328	NA	NA
ENSDARG00000005332	0.693858	1.07373	2.67492	0.401406	0.688121	NA	lipib
ENSDARG00000005335	0.457139	2.6361	3.22843	0.816528	0.414198	NA	NA
ENSDARG00000005343	5.07413	0.273486	0.816726	0.334856	0.737733	0.853475	ccdc85al
ENSDARG00000005350	2612.03	-0.237873	0.0850514	-2.79682	0.00516085	0.0232015	dip2ba
ENSDARG00000005355	84.9777	0.123119	0.215934	0.570168	0.568563	0.734821	larp6a
ENSDARG00000005356	579.136	-0.576781	0.192313	-2.99918	0.00270704	0.0136402	tyro3
ENSDARG00000005359	1220.03	0.147405	0.0989872	1.48913	0.136453	0.2898	sucla2
ENSDARG00000005364	342.989	-1.71101	0.262787	-6.511	7.46509e-11	2.82323e-09	grin3ba
ENSDARG00000005368	102.914	-0.691094	0.269513	-2.56424	0.0103403	0.0406732	mcamb
ENSDARG00000005371	4.1361	2.46872	1.01298	2.43709	0.0148059	0.0541849	gprc6a
ENSDARG00000005372	3.97664	1.64739	1.0783	1.52776	0.126573	0.274779	camk4
ENSDARG00000005374	359.329	-0.0866647	0.17209	-0.5036	0.614543	0.768929	tubgcp4
ENSDARG00000005382	1152.39	-0.043328	0.109176	-0.396865	0.691467	0.824263	prdm9
ENSDARG00000005392	26.8036	0.586825	0.38764	1.51384	0.130066	0.280367	slc5a5
ENSDARG00000005394	83.3954	-0.724924	0.475674	-1.52399	0.127511	0.276408	dnmt3aa
ENSDARG00000005397	879.937	-0.955322	0.161994	-5.89728	3.69545e-09	9.98806e-08	trim3b
ENSDARG00000005414	4.16156	0.569376	0.886852	0.642019	0.520861	0.696692	grapa
ENSDARG00000005416	152.686	-0.514569	0.193474	-2.65963	0.00782266	0.0324687	map3k5
ENSDARG00000005423	229.851	0.0731201	0.184317	0.396708	0.691583	0.824263	pgam1a
ENSDARG00000005425	456.223	-0.0452691	0.159113	-0.284508	0.776021	0.878347	wdfy1
ENSDARG00000005448	138.371	0.329649	0.224503	1.46835	0.142009	0.298703	mtfmt
ENSDARG00000005451	3205.31	-0.148502	0.0829317	-1.79066	0.073348	0.185091	gdi2
ENSDARG00000005453	189.711	0.0608641	0.20376	0.298705	0.765165	0.871679	foxp2
ENSDARG00000005454	3828.17	0.00706024	0.118839	0.05941	0.952626	0.976618	tacc3
ENSDARG00000005456	1231.91	-0.20708	0.100236	-2.06593	0.0388348	0.115242	katnb1
ENSDARG00000005458	1682.59	0.0284359	0.0920907	0.308782	0.757488	0.866943	csnk1g2a
ENSDARG00000005462	4492.25	-0.224827	0.0959432	-2.34333	0.0191124	0.0665683	kif4
ENSDARG00000005463	839.843	0.348945	0.146051	2.38921	0.0168847	0.0604291	slc30a1a
ENSDARG00000005464	114.278	0.15563	0.220145	0.706941	0.479603	0.66353	dnase1l1
ENSDARG00000005468	693.379	0.293408	0.124371	2.35913	0.0183178	0.0644033	irf2bp1
ENSDARG00000005476	46.2538	0.0661535	0.294475	0.224649	0.822252	0.904192	nav3
ENSDARG00000005479	448.706	-2.1617	0.341787	-6.3247	2.53725e-10	8.88302e-09	tenm3
ENSDARG00000005481	229.144	1.52613	0.256198	5.95681	2.57202e-09	7.19318e-08	nfkbiaa
ENSDARG00000005482	224.346	-0.306661	0.167248	-1.83357	0.0667178	0.172901	rapgef2
ENSDARG00000005485	0.105988	-0.728386	4.08052	-0.178503	0.858328	NA	NA
ENSDARG00000005500	118.895	-0.308987	0.225746	-1.36874	0.171081	0.341404	dgcr6
ENSDARG00000005510	0.262798	-2.06299	4.00412	-0.515217	0.606401	NA	NA
ENSDARG00000005513	10961.1	-0.0114943	0.107681	-0.106744	0.914992	0.956706	naca
ENSDARG00000005518	1.42581	1.53044	1.72424	0.887604	0.374754	NA	slc5a9
ENSDARG00000005525	1648.78	0.36453	0.129817	2.80802	0.00498475	0.0224996	acy3.2
ENSDARG00000005526	3.55094	0.266514	1.17903	0.226044	0.821167	0.903663	igfn1.1
ENSDARG00000005536	1216.25	-0.215703	0.119924	-1.79866	0.0720728	0.182734	ubr7
ENSDARG00000005540	4714.79	-0.367971	0.118483	-3.10568	0.00189843	0.0102171	xpo7
ENSDARG00000005541	55.1966	-2.11174	0.479101	-4.40771	1.04467e-05	0.000116419	wif1
ENSDARG00000005544	108.342	-0.273274	0.192454	-1.41994	0.155624	0.319427	btbd3a
ENSDARG00000005547	110.001	0.276789	0.231336	1.19648	0.231509	0.419797	rint1
ENSDARG00000005549	470.731	-0.476717	0.147843	-3.22448	0.00126203	0.00726984	znf710b
ENSDARG00000005551	16318.3	0.220966	0.0919849	2.4022	0.016297	0.0587823	hnrnph1l
ENSDARG00000005559	0.751181	0.809181	2.25725	0.358481	0.719983	NA	pou4f1
ENSDARG00000005560	962.867	-0.257301	0.179593	-1.43269	0.151946	0.313975	ywhah
ENSDARG00000005561	384.483	0.218612	0.142306	1.53621	0.124487	0.271781	gfm2
ENSDARG00000005565	3.28054	1.22798	1.13299	1.08383	0.278438	0.472151	entpd8
ENSDARG00000005574	19.9156	1.03069	0.468351	2.20068	0.0277588	0.0890627	vsx2
ENSDARG00000005576	6555.5	0.0899911	0.0760924	1.18266	0.236946	0.426187	mphosph8
[truncated: 24,940 more rows]

## Sheet: S1_4
gene ID	baseMean	log2FoldChange	lfcSE	stat	pvalue	padj	external_gene_name
[truncated: 25,776 more rows]
