# Supplementary material for: MondoA regulates gene expression in cholesterol biosynthesis-associated pathways required for zebrafish epiboly
Source: eLife. 2020 Sep 24;9:e57068. doi: 10.7554/eLife.57068 (PMC7515633; doi:10.7554/eLife.57068)
Supplement: Supplementary file 2. [file elife-57068-supp2.xlsx]

## Sheet: Table Legend
S2_1	Metabolic geneset enrichment analysis of differential gene expression between mondoa morphants vs mismatch MO injected embryos
S2_2	Metabolic geneset enrichment analysis of differential gene expression between MZmondoa mutants with unaffected epiboly vs wild-type embryos
S2_3	Metabolic geneset enrichment analysis of differential gene expression between MZmondoa mutants with affected epiboly vs wild-type embryos
S2_4	Metabolic geneset enrichment analysis of differential gene expression between MZmondoa mutants with affected epiboly vs MZmondoa mutants with unaffected epiboly
S2_5	GO term geneset enrichment analysis of differential gene expression between mondoa morphants vs mismatch MO injected embryos
S2_6	GO term geneset enrichment analysis of differential gene expression between MZmondoa mutants with unaffected epiboly vs wild-type embryos
S2_7	GO term geneset enrichment analysis of differential gene expression between MZmondoa mutants with affected epiboly vs wild-type embryos
S2_8	GO term geneset enrichment analysis of differential gene expression between MZmondoa mutants with affected epiboly vs MZmondoa mutants with unaffected epiboly

## Sheet: S2_1
Term	NGenes	Direction	PValue
Terpenoid backbone synthesis	20	Down	0.0158152
Sterol biosynthesis	12	Down	0.0216901
Synthesis and degradation of ketone bodies	6	Down	0.0240766
TCA cycle	25	Up	0.0247667
Glycolysis, Gluconeogenesis	40	Up	0.0373791
Purine metabolism	58	Up	0.0495343
Cysteine and methionine metabolism	29	Down	0.0527634
Lysine degradation	40	Up	0.0590468
Arginine and proline metabolism	33	Down	0.0612235
Glycine,serine and threonine metabolism	30	Up	0.0634145
Alanine. aspartate and glutamate metabolism	25	Down	0.0700612
Pyrimidine metabolism	40	Up	0.0730254
Pentose phosphate cycle	16	Down	0.124183
Glyoxylate and dicarboxylate metabolism	18	Down	0.138829
One carbon pool by folate	10	Up	0.138913
Steroid hormone biosynthesis	9	Down	0.253572
Phenylalanin metabolism	9	Down	0.407343
Tyrosine metabolism	11	Down	0.455954
Valine, Leucine and isoleucine degradation	41	Down	0.467653
Tryptophan metabolism	22	Down	0.475923
Folate biosynthesis	9	Down	0.584394
Pyruvate metabolism	29	Down	0.602939
Glutathione metabolism	31	Up	0.752854
Histidine metabolism	13	Up	0.919741

## Sheet: S2_2
Term	NGenes	Direction	PValue
Valine, Leucine and isoleucine degradation	41	Up	0.0015971
TCA cycle	25	Up	0.00312561
Pyruvate metabolism	29	Up	0.0047885
Glyoxylate and dicarboxylate metabolism	18	Up	0.0108563
Terpenoid backbone synthesis	20	Up	0.0121244
Pentose phosphate cycle	16	Up	0.0245155
Steroid hormone biosynthesis	9	Up	0.0330008
Glycine, serine and threonine metabolism	30	Up	0.0816058
Glutathione metabolism	31	Up	0.207369
Lysine degradation	40	Up	0.219421
Cysteine and methionine metabolism	29	Up	0.248032
Phenylalanin metabolism	9	Down	0.25555
Synthesis and degradation of ketone bodies	6	Up	0.263311
Alanine, aspartate and glutamate metabolism	25	Up	0.358002
Purine metabolism	58	Up	0.368112
Tryptophan metabolism	22	Up	0.445086
Pyrimidine metabolism	40	Down	0.446107
Glycolysis, Gluconeogenesis	40	Up	0.486293
Histidine metabolism	13	Up	0.695888
Folate biosynthesis	9	Down	0.833647
Sterol biosynthesis	12	Up	0.873829
Arginine and proline metabolism	33	Up	0.888731
Tyrosine metabolism	11	Up	0.937565
One carbon pool by folate	10	Down	0.942706

## Sheet: S2_3
Term	NGenes	Direction	PValue
Pentose phosphate cycle	16	Up	0.00385267
Pyruvate metabolism	29	Up	0.00460398
Valine, Leucine and isoleucine degradation	41	Up	0.00961941
TCA cycle	25	Up	0.0146713
Steroid hormone biosynthesis	9	Up	0.0165165
Glycine, serine and threonine metabolism	30	Up	0.0328201
Glycolysis, Gluconeogenesis	40	Up	0.0342104
Glyoxylate and dicarboxylate metabolism	18	Up	0.0942168
Purine metabolism	58	Up	0.115051
Tryptophan metabolism	22	Up	0.134089
Lysine degradation	40	Up	0.138998
Terpenoid backbone synthesis	20	Up	0.178086
Glutathione metabolism	31	Up	0.257053
Histidine metabolism	13	Up	0.275252
Phenylalanin metabolism	9	Down	0.301736
Arginine and proline metabolism	33	Up	0.350425
Pyrimidine metabolism	40	Down	0.35512
Synthesis and degradation of ketone bodies	6	Up	0.517827
Alanine, aspartate and glutamate metabolism	25	Up	0.633213
One carbon pool by folate	10	Down	0.640251
Sterol biosynthesis	12	Up	0.787901
Cysteine and methionine metabolism	29	Down	0.840911
Folate biosynthesis	9	Down	0.948946
Tyrosine metabolism	11	Up	0.960023

## Sheet: S2_4
Term	NGenes	Direction	PValue
Glycolysis, Gluconeogenesis	40	Up	0.014136
Pentose phosphate cycle	16	Up	0.0214646
Steroid hormone biosynthesis	9	Up	0.0492726
Purine metabolism	58	Up	0.102744
Cysteine and methionine metabolism	29	Down	0.104272
Histidine metabolism	13	Up	0.122414
Tryptophan metabolism	22	Up	0.128379
Arginine and proline metabolism	33	Up	0.202644
Pyruvate metabolism	29	Up	0.219439
Lysine degradation	40	Up	0.276373
One carbon pool by folate	10	Down	0.290326
Glycine, serine and threonine metabolism	30	Up	0.322501
Glutathione metabolism	31	Up	0.354861
Alanine, aspartate and glutamate metabolism	25	Down	0.390373
Synthesis and degradation of ketone bodies	6	Down	0.516773
Terpenoid backbone synthesis	20	Down	0.560771
Pyrimidine metabolism	40	Down	0.571286
Valine, Leucine and isoleucine degradation	41	Up	0.613297
TCA cycle	25	Up	0.623189
Glyoxylate and dicarboxylate metabolism	18	Down	0.695248
Sterol biosynthesis	12	Up	0.824222
Phenylalanin metabolism	9	Down	0.851028
Folate biosynthesis	9	Up	0.871601
Tyrosine metabolism	11	Up	0.936271

## Sheet: S2_5
Term	NGenes	Direction	PValue
GO_BP_DR_NUCLEOSOME_ASSEMBLY	29	Up	0.000218058
GO_CC_DR_NUCLEOSOME	24	Up	0.00025979
GO_BP_DR_ATP_HYDROLYSIS_COUPLED_PROTON_TRANSPORT	19	Up	0.000386758
GO_MF_DR_RNA_BINDING	228	Up	0.000560398
GO_CC_DR_INTEGRAL_TO_GOLGI_MEMBRANE	14	Down	0.000729723
GO_BP_DR_EMBRYONIC_VISCEROCRANIUM_MORPHOGENESIS	11	Up	0.000770416
GO_MF_DR_BINDING	266	Up	0.00081528
GO_MF_DR_HYDROGEN_ION_TRANSPORTING_ATP_SYNTHASE_ACTIVITY_ROTATIONAL_MECHANISM	11	Up	0.00155726
GO_MF_DR_ANTIOXIDANT_ACTIVITY	11	Up	0.00185501
GO_BP_DR_EPIBOLY_GASTRULATION_WITH_MOUTH_FORMING_SECOND	16	Up	0.00210878
GO_CC_DR_RIBONUCLEOPROTEIN_COMPLEX	100	Up	0.00225816
GO_MF_DR_AMINOACYL-TRNA_EDITING_ACTIVITY	7	Up	0.0023595
GO_BP_DR_ATP_METABOLIC_PROCESS	8	Up	0.00322977
GO_MF_DR_SIALYLTRANSFERASE_ACTIVITY	10	Down	0.00399123
GO_CC_DR_PROTON-TRANSPORTING_V-TYPE_ATPASE_V1_DOMAIN	7	Up	0.00629078
GO_MF_DR_NUCLEIC_ACID_BINDING	698	Up	0.00674911
GO_CC_DR_MITOCHONDRION	125	Down	0.00686459
GO_CC_DR_PROTON-TRANSPORTING_TWO-SECTOR_ATPASE_COMPLEX_CATALYTIC_DOMAIN	7	Up	0.0071754
GO_BP_DR_EMBRYO_DEVELOPMENT	67	Up	0.00751124
GO_BP_DR_NEURON_DIFFERENTIATION	8	Up	0.00783586
GO_BP_DR_PURINE_NUCLEOTIDE_BIOSYNTHETIC_PROCESS	8	Up	0.00834619
GO_MF_DR_NAD_BINDING2	28	Up	0.00932134
GO_BP_DR_ANTERIOR_POSTERIOR_PATTERN_SPECIFICATION	13	Up	0.00938005
GO_MF_DR_DOUBLE-STRANDED_DNA_BINDING	20	Up	0.00961471
GO_MF_DR_NADH_DEHYDROGENASE_UBIQUINONE_ACTIVITY	19	Down	0.00972496
GO_BP_DR_GENE_SILENCING_BY_RNA	12	Up	0.0101796
GO_BP_DR_CELLULAR_AMINO_ACID_METABOLIC_PROCESS	19	Down	0.0118918
GO_BP_DR_EMBRYONIC_HEART_TUBE_DEVELOPMENT	12	Up	0.0126504
GO_MF_DR_DNA_BINDING	595	Up	0.0132355
GO_MF_DR_SYMPORTER_ACTIVITY	6	Down	0.0156756
GO_CC_DR_CHROMOSOME	60	Up	0.0178055
GO_MF_DR_PROTEIN_HETERODIMERIZATION_ACTIVITY	12	Up	0.0182791
GO_BP_DR_RETINA_DEVELOPMENT_IN_CAMERA-TYPE_EYE	40	Up	0.0201303
GO_BP_DR_NEURAL_TUBE_FORMATION	6	Up	0.0203711
GO_MF_DR_CYSTEINE-TYPE_ENDOPEPTIDASE_ACTIVITY	19	Down	0.0203881
GO_BP_DR_TRANSMEMBRANE_TRANSPORT	222	Down	0.0205358
GO_MF_DR_RNA_POLYMERASE_II_DISTAL_ENHANCER_SEQUENCE-SPECIFIC_DNA_BINDING_TRANSCRIPTION_FACTOR_ACTIVITY	17	Up	0.0207572
GO_MF_DR_DNA_BINDING_BENDING	17	Up	0.0207572
GO_CC_DR_NUCLEOLUS	44	Up	0.0220566
GO_CC_DR_ENDOPLASMIC_RETICULUM_MEMBRANE	53	Down	0.0221422
GO_BP_DR_CELLULAR_PROCESS	7	Up	0.0226331
GO_BP_DR_NEURAL_CREST_MIGRATION	18	Up	0.023247
GO_BP_DR_NUCLEAR_MRNA_SPLICING_VIA_SPLICEOSOME	10	Up	0.0237703
GO_BP_DR_PROTEIN_DEACETYLATION	8	Up	0.0239933
GO_CC_DR_P_GRANULE	8	Up	0.0250169
GO_BP_DR_TRICARBOXYLIC_ACID_CYCLE	15	Up	0.0253981
GO_BP_DR_PROTEIN_POLYMERIZATION	13	Up	0.0257999
GO_BP_DR_POSITIVE_FROM_RNA_POLYMERASE_II_PROMOTER	19	Up	0.0265616
GO_MF_DR_SULFURIC_ESTER_HYDROLASE_ACTIVITY	12	Down	0.0271835
GO_BP_DR_VESICLE_DOCKING_EXOCYTOSIS	8	Up	0.0283528
GO_BP_DR_GLYCINE_CATABOLIC_PROCESS	7	Up	0.0285716
GO_CC_DR_PROTEIN_PHOSPHATASE_TYPE_2A_COMPLEX	7	Up	0.0307992
GO_MF_DR_PROTEIN_PHOSPHATASE_TYPE_2A_REGULATOR_ACTIVITY	7	Up	0.0307992
GO_BP_DR_ANGIOGENESIS	32	Up	0.0310793
GO_MF_DR_LIPID_BINDING	16	Up	0.0318416
GO_MF_DR_3-BETA-HYDROXY-DELTA5-STEROID_DEHYDROGENASE_ACTIVITY	6	Down	0.0329594
GO_MF_DR_ENDOPEPTIDASE_ACTIVITY	18	Down	0.0365561
GO_MF_DR_ATP-DEPENDENT_HELICASE_ACTIVITY	67	Up	0.036714
GO_BP_DR_DNA_RECOMBINATION	32	Up	0.0372682
GO_BP_DR_STEROID_BIOSYNTHETIC_PROCESS	9	Down	0.03791
GO_BP_DR_REGULATION_SEQUENCE-SPECIFIC_DNA_BINDING_TRANSCRIPTION_FACTOR_ACTIVITY	17	Up	0.038198
GO_BP_DR_PROTEOLYSIS_CELLULAR_PROTEIN_CATABOLIC_PROCESS	16	Down	0.0394478
GO_CC_DR_PROTEASOME_CORE_COMPLEX	16	Down	0.0394478
GO_MF_DR_THREONINE-TYPE_ENDOPEPTIDASE_ACTIVITY	16	Down	0.0394478
GO_BP_DR_LIPOPOLYSACCHARIDE_BIOSYNTHETIC_PROCESS	37	Down	0.0402217
GO_MF_DR_TRANSCRIPTION_COACTIVATOR_ACTIVITY	16	Up	0.0403593
GO_CC_DR_PROTON-TRANSPORTING_TWO-SECTOR_ATPASE_COMPLEX_PROTON-TRANSPORTING_DOMAIN	8	Up	0.040962
GO_BP_DR_CONVERGENT_EXTENSION	13	Up	0.0411994
GO_MF_DR_AMINOPEPTIDASE_ACTIVITY	13	Up	0.0431237
GO_BP_DR_TISSUE_DEVELOPMENT	10	Up	0.0436599
GO_MF_DR_TRANSCRIPTION_FACTOR_BINDING	27	Up	0.0448903
GO_BP_DR_DNA-DEPENDENT_TRANSCRIPTION_INITIATION	13	Up	0.0452734
GO_BP_DR_REGULATION_PHOSPHORYLATION	8	Down	0.0468925
GO_MF_DR_UBIQUITIN_THIOLESTERASE_ACTIVITY	48	Down	0.0471946
GO_BP_DR_PROJECTION_ORGANIZATION	10	Down	0.0485341
GO_BP_DR_COMMUNICATION	52	Up	0.0487302
GO_BP_DR_EMBRYONIC_PATTERN_SPECIFICATION	8	Up	0.0500719
GO_BP_DR_PROTON_TRANSPORT	43	Up	0.0527121
GO_MF_DR_PROTEIN_DIMERIZATION_ACTIVITY	94	Up	0.0528788
GO_BP_DR_TRANSLATION	146	Up	0.0531513
GO_MF_DR_ENDOPEPTIDASE_INHIBITOR_ACTIVITY	8	Up	0.0538103
GO_MF_DR_TRANSAMINASE_ACTIVITY	10	Down	0.0547055
GO_BP_DR_DNA_TOPOLOGICAL_CHANGE	11	Up	0.0550426
GO_MF_DR_HYDROGEN_ION_TRANSMEMBRANE_TRANSPORTER_ACTIVITY	17	Up	0.0555416
GO_BP_DR_PHOSPHOLIPID_TRANSPORT	12	Down	0.0558165
GO_BP_DR_PROTEIN_AUTOPHOSPHORYLATION	10	Up	0.0561
GO_CC_DR_INTERMEDIATE_FILAMENT	11	Down	0.0561971
GO_MF_DR_MANGANESE_ION_BINDING	9	Up	0.0578957
GO_BP_DR_APOPTOTIC_PROCESS	37	Down	0.058088
GO_MF_DR_GTPASE_REGULATOR_ACTIVITY	6	Down	0.0592222
GO_MF_DR_NUCLEIC_ACID_BINDING_TRANSCRIPTION_FACTOR_ACTIVITY	6	Up	0.0593776
GO_BP_DR_NEURAL_CREST_DEVELOPMENT	10	Up	0.0594054
GO_CC_DR_PROTEIN_COMPLEX	15	Up	0.0622521
GO_CC_DR_EUKARYOTIC_TRANSLATION_INITIATION_FACTOR_3_COMPLEX	6	Up	0.0629809
GO_BP_DR_PECTORAL_FIN_DEVELOPMENT	8	Up	0.0666858
GO_MF_DR_PHOSPHOLIPID-TRANSLOCATING_ATPASE_ACTIVITY	10	Down	0.0681586
GO_BP_DR_FATTY_ACID_METABOLIC_PROCESS	11	Down	0.0683495
GO_CC_DR_NUCLEAR_SPECK	8	Up	0.0694325
GO_MF_DR_PHOSPHOTRANSFERASE_ACTIVITY_ALCOHOL_GROUP_AS_ACCEPTOR	74	Down	0.0699742
GO_BP_DR_DOUBLE-STRAND_BREAK_REPAIR_VIA_HOMOLOGOUS_RECOMBINATION	6	Down	0.0710896
GO_BP_DR_RESPONSE_TO_DNA_DAMAGE_STIMULUS	33	Up	0.0711315
GO_BP_DR_IRON-SULFUR_CLUSTER_ASSEMBLY	8	Down	0.0717966
GO_MF_DR_CYTOSKELETAL_PROTEIN_BINDING	14	Up	0.0736576
GO_CC_DR_INTRINSIC_TO_ENDOPLASMIC_RETICULUM_MEMBRANE	9	Up	0.0764438
GO_MF_DR_HELICASE_ACTIVITY	93	Up	0.0780811
GO_CC_DR_MITOCHONDRIAL_INNER_MEMBRANE	48	Down	0.0786511
GO_CC_DR_MEMBRANE_COAT	15	Up	0.0803688
GO_BP_DR_RESPIRATORY_ELECTRON_TRANSPORT_CHAIN	6	Down	0.0828605
GO_MF_DR_NAD_BINDING	9	Up	0.0834472
GO_BP_DR_UBIQUITIN-DEPENDENT_PROTEIN_CATABOLIC_PROCESS	72	Down	0.0876773
GO_CC_DR_NUCLEOPLASM	11	Up	0.0887129
GO_BP_DR_SPROUTING_ANGIOGENESIS	16	Up	0.0897455
GO_CC_DR_TRANSCRIPTION_FACTOR_COMPLEX	50	Up	0.0905706
GO_MF_DR_OXIDOREDUCTASE_SINGLE_DONORS_MOLECULAR_OXYGEN_INCORPORATION_TWO_ATOMS_OXYGEN	15	Up	0.0907863
GO_BP_DR_TRNA_AMINOACYLATION_FOR_PROTEIN_TRANSLATION	29	Up	0.0911678
GO_MF_DR_ATPASE_ACTIVITY	64	Up	0.0920158
GO_BP_DR_MIGRATION_GASTRULATION	32	Up	0.092591
GO_MF_DR_TRANSCRIPTION_REGULATORY_REGION_DNA_BINDING	10	Up	0.0932646
GO_MF_DR_COFACTOR_BINDING	12	Up	0.0940974
GO_BP_DR_RESPONSE_TO_COPPER_ION	6	Up	0.094683
GO_CC_DR_CHROMOSOME_CENTROMERIC_REGION	17	Down	0.0954002
GO_MF_DR_CYSTEINE-TYPE_PEPTIDASE_ACTIVITY	57	Down	0.0954444
GO_BP_DR_AXON_EXTENSION	6	Up	0.0979824
GO_BP_DR_SKELETAL_MUSCLE_TISSUE_DEVELOPMENT	7	Up	0.0999073
GO_MF_DR_CYTOCHROME-C_OXIDASE_ACTIVITY	13	Down	0.100202
GO_BP_DR_NUCLEAR-TRANSCRIBED_MRNA_CATABOLIC_PROCESS_NONSENSE-MEDIATED_DECAY	9	Up	0.100365
GO_BP_DR_HEART_LOOPING	29	Up	0.101938
GO_BP_DR_SPINAL_CORD_MOTOR_NEURON_DIFFERENTIATION	6	Up	0.10205
GO_MF_DR_PROTON-TRANSPORTING_ATPASE_ACTIVITY_ROTATIONAL_MECHANISM	10	Up	0.102751
GO_CC_DR_SPLICEOSOMAL_COMPLEX	16	Up	0.103429
GO_CC_DR_INTEGRAL_TO_PLASMA_MEMBRANE	23	Down	0.103611
GO_MF_DR_HYDROLASE_ACTIVITY_ACTING_ON_ESTER_BONDS	29	Down	0.104739
GO_BP_DR_MEIOSIS	9	Up	0.105501
GO_MF_DR_NUCLEOSIDE-TRIPHOSPHATASE_ACTIVITY	101	Up	0.107474
GO_BP_DR_CELL-SIGNALING	6	Down	0.108162
GO_BP_DR_ATP_SYNTHESIS_COUPLED_ELECTRON_TRANSPORT	6	Down	0.110614
GO_BP_DR_DNA-DEPENDENT	454	Up	0.112099
GO_BP_DR_TRNA_METHYLATION	7	Up	0.113394
GO_BP_DR_INTRACELLULAR_RECEPTOR_MEDIATED_SIGNALING_PATHWAY	13	Down	0.113624
GO_MF_DR_NUCLEOTIDYLTRANSFERASE_ACTIVITY	35	Up	0.113675
GO_BP_DR_RESPONSE_TO_METHYLMERCURY	7	Up	0.11514
GO_BP_DR_PHOTOSYNTHESIS	6	Down	0.115284
GO_BP_DR_CHLOROPHYLL_BIOSYNTHETIC_PROCESS	6	Down	0.115284
GO_MF_DR_MAGNESIUM_CHELATASE_ACTIVITY	6	Down	0.115284
GO_BP_DR_NUCLEOSIDE_METABOLIC_PROCESS	10	Up	0.118522
GO_MF_DR_PEROXIREDOXIN_ACTIVITY	6	Up	0.118619
GO_CC_DR_RIBOSOME	134	Up	0.119182
GO_MF_DR_HYDROLASE_ACTIVITY_ACTING_ON_GLYCOSYL_BONDS	12	Up	0.120452
GO_CC_DR_INTEGRIN_COMPLEX	13	Up	0.121868
GO_BP_DR_RESPONSE_TO_CADMIUM_ION	6	Up	0.123005
GO_MF_DR_CHROMATIN_BINDING	18	Up	0.127985
GO_BP_DR_CAMERA-TYPE_EYE_DEVELOPMENT	12	Up	0.128314
GO_BP_DR_FOREBRAIN_DEVELOPMENT	8	Down	0.128896
GO_BP_DR_IMMUNE_RESPONSE	17	Down	0.129856
GO_MF_DR_TRANSFERASE_ACTIVITY	415	Up	0.132103
GO_BP_DR_ATP_CATABOLIC_PROCESS	122	Up	0.13575
GO_BP_DR_CELLULAR_COMPONENT_ORGANIZATION	10	Up	0.1363
GO_BP_DR_NEGATIVE_REGULATION_ENDOPEPTIDASE_ACTIVITY	27	Up	0.13654
GO_CC_DR_EXTRINSIC_TO_MEMBRANE	10	Up	0.136702
GO_MF_DR_LIGAND-ACTIVATED_SEQUENCE-SPECIFIC_DNA_BINDING_RNA_POLYMERASE_II_TRANSCRIPTION_FACTOR_ACTIVITY	11	Down	0.13671
GO_MF_DR_P-P-BOND-HYDROLYSIS-DRIVEN_PROTEIN_TRANSMEMBRANE_TRANSPORTER_ACTIVITY	6	Up	0.136809
GO_BP_DR_ELECTRON_TRANSPORT_CHAIN	16	Down	0.137087
GO_BP_DR_WNT_RECEPTOR_SIGNALING_PATHWAY	31	Up	0.138161
GO_BP_DR_PEPTIDYL-PROLINE_MODIFICATION	8	Up	0.139733
GO_MF_DR_FK506_BINDING	8	Up	0.139733
GO_BP_DR_PENTOSE-PHOSPHATE_SHUNT	9	Down	0.139913
GO_BP_DR_EXTRACELLULAR_POLYSACCHARIDE_BIOSYNTHETIC_PROCESS	8	Down	0.142856
GO_MF_DR_DTDP-4-DEHYDRORHAMNOSE_REDUCTASE_ACTIVITY	8	Down	0.142856
GO_BP_DR_EMBRYONIC_PECTORAL_FIN_MORPHOGENESIS	7	Up	0.144556
GO_MF_DR_STRUCTURAL_CONSTITUENT_RIBOSOME	111	Up	0.144893
GO_MF_DR_HYDROLASE_ACTIVITY_HYDROLYZING_O-GLYCOSYL_COMPOUNDS	28	Up	0.145452
GO_MF_DR_RRNA_BINDING	9	Up	0.145556
GO_MF_DR_HISTONE-LYSINE_N-METHYLTRANSFERASE_ACTIVITY	17	Up	0.146552
GO_BP_DR_CYCLE	76	Down	0.148661
GO_CC_DR_ACTIN_CYTOSKELETON	16	Up	0.14927
GO_BP_DR_MIDBRAIN_DEVELOPMENT	8	Up	0.150348
GO_CC_DR_PCG_PROTEIN_COMPLEX	6	Down	0.15097
GO_BP_DR_GROWTH2	9	Up	0.152121
GO_BP_DR_LIPID_METABOLIC_PROCESS	54	Down	0.152494
GO_MF_DR_AMINOACYL-TRNA_LIGASE_ACTIVITY	33	Up	0.153674
GO_CC_DR_MICROTUBULE_BASAL_BODY	7	Down	0.154983
GO_BP_DR_INTRAHEPATIC_BILE_DUCT_DEVELOPMENT	6	Down	0.157103
GO_BP_DR_CARTILAGE_DEVELOPMENT	34	Up	0.157244
GO_MF_DR_ACTIN_FILAMENT_BINDING	10	Up	0.157481
GO_BP_DR_GASTRULATION	15	Up	0.15804
GO_BP_DR_NEUROGENESIS	7	Down	0.158066
GO_CC_DR_CYTOSKELETON	109	Up	0.160576
GO_MF_DR_SH3_DOMAIN_BINDING	14	Down	0.160838
GO_MF_DR_EXONUCLEASE_ACTIVITY	16	Up	0.164105
GO_MF_DR_ATP-DEPENDENT_DNA_HELICASE_ACTIVITY	8	Down	0.164196
GO_BP_DR_VESICLE-MEDIATED_TRANSPORT	94	Up	0.164608
GO_BP_DR_BMP_SIGNALING_PATHWAY	7	Up	0.164646
GO_BP_DR_TERMINATION_G-PROTEIN_COUPLED_RECEPTOR_SIGNALING_PATHWAY	20	Down	0.164795
GO_MF_DR_35-CYCLIC-NUCLEOTIDE_PHOSPHODIESTERASE_ACTIVITY	10	Down	0.166663
GO_MF_DR_DNA_TOPOISOMERASE_TYPE_I_ACTIVITY	9	Up	0.167396
GO_CC_DR_AXON	7	Down	0.167439
GO_BP_DR_DNA_DUPLEX_UNWINDING	10	Down	0.167773
GO_BP_DR_BLOOD_VESSEL_DEVELOPMENT	13	Up	0.168752
GO_BP_DR_SKELETAL_MUSCLE_FIBER_DEVELOPMENT	7	Up	0.169115
GO_BP_DR_CONVERGENT_EXTENSION_AXIS_ELONGATION	13	Up	0.171947
GO_CC_DR_CYTOSOL	49	Up	0.173121
GO_BP_DR_PROTEIN_IMPORT_NUCLEUS	9	Down	0.173572
GO_BP_DR_MICROTUBULE-BASED_PROCESS	17	Up	0.175785
GO_BP_DR_VASCULOGENESIS	17	Up	0.177091
GO_BP_DR_PIGMENTATION	6	Up	0.177777
GO_BP_DR_LIVER_DEVELOPMENT	23	Up	0.181038
GO_CC_DR_NUCLEAR_PORE	11	Up	0.182337
GO_BP_DR_CHROMOSOME_CONDENSATION	7	Up	0.182594
GO_BP_DR_REGULATION_CYCLIN-DEPENDENT_PROTEIN_KINASE_ACTIVITY	15	Down	0.186958
GO_MF_DR_STRUCTURAL_MOLECULE_ACTIVITY	55	Up	0.189547
GO_CC_DR_CYTOPLASM	675	Up	0.191219
GO_MF_DR_FOUR-WAY_JUNCTION_HELICASE_ACTIVITY	15	Up	0.194099
GO_MF_DR_PEPTIDYL-PROLYL_CIS-TRANS_ISOMERASE_ACTIVITY	22	Up	0.19447
GO_CC_DR_MHC_CLASS_I_PROTEIN_COMPLEX	7	Down	0.197418
GO_CC_DR_RESPIRATORY_CHAIN	10	Down	0.197581
GO_BP_DR_PROTEIN_PEPTIDYL-PROLYL_ISOMERIZATION	15	Up	0.198673
GO_MF_DR_G-PROTEIN_COUPLED_RECEPTOR_BINDING	6	Down	0.199148
GO_BP_DR_SIGNAL_TRANSDUCTION_BY_PHOSPHORYLATION	19	Up	0.201238
GO_MF_DR_CALMODULIN_BINDING	11	Up	0.203956
GO_MF_DR_DNA-DIRECTED_RNA_POLYMERASE_ACTIVITY	23	Down	0.20441
GO_BP_DR_SKELETAL_SYSTEM_DEVELOPMENT	9	Up	0.205849
GO_BP_DR_STRIATED_MUSCLE_DEVELOPMENT	8	Up	0.207473
GO_BP_DR_MULTICELLULAR_ORGANISMAL_DEVELOPMENT	167	Up	0.209075
GO_BP_DR_DETERMINATION_VENTRAL_IDENTITY	10	Up	0.210293
GO_BP_DR_SIGNAL_TRANSDUCTION	382	Up	0.210784
GO_MF_DR_PYRIDOXAL_PHOSPHATE_BINDING	32	Down	0.218604
GO_BP_DR_POSITIVE_REGULATION_FIBROBLAST_GROWTH_FACTOR_RECEPTOR_SIGNALING_PATHWAY	6	Up	0.22036
GO_BP_DR_CILIUM_ASSEMBLY	20	Down	0.221377
GO_BP_DR_CENTRAL_NERVOUS_SYSTEM_MORPHOGENESIS	6	Up	0.22225
GO_MF_DR_PHOSPHORIC_DIESTER_HYDROLASE_ACTIVITY	28	Down	0.222945
GO_BP_DR_TRNA_PROCESSING	28	Down	0.223038
GO_MF_DR_DAMAGED_DNA_BINDING	22	Up	0.224417
GO_BP_DR_PRONEPHROS_DEVELOPMENT	19	Up	0.22452
GO_MF_DR_HYDROLASE_ACTIVITY_ACTING_ON_ACID_ANHYDRIDES_CATALYZING_TRANSMEMBRANE_MOVEMENT_SUBSTANCES	30	Up	0.224755
GO_BP_DR_REGULATION_NEURON_APOPTOTIC_PROCESS	6	Up	0.229885
GO_MF_DR_NUCLEASE_ACTIVITY	24	Up	0.231503
GO_BP_DR_ZINC_ION_TRANSPORT	8	Up	0.232638
GO_BP_DR_ZINC_ION_TRANSMEMBRANE_TRANSPORT	8	Up	0.232638
GO_MF_DR_ZINC_ION_TRANSMEMBRANE_TRANSPORTER_ACTIVITY	8	Up	0.232638
GO_BP_DR_RNA_METABOLIC_PROCESS	16	Up	0.232859
GO_BP_DR_PHOSPHATIDYLINOSITOL_PHOSPHORYLATION	21	Down	0.233239
GO_BP_DR_ONE-CARBON_METABOLIC_PROCESS	10	Up	0.235005
GO_BP_DR_INTRAFLAGELLAR_TRANSPORT	6	Down	0.235462
GO_BP_DR_PROTEIN_LOCALIZATION	6	Up	0.237876
GO_CC_DR_LYSOSOMAL_MEMBRANE	9	Down	0.238715
GO_BP_DR_EMBRYONIC_RETINA_MORPHOGENESIS_IN_CAMERA-TYPE_EYE	11	Up	0.240586
GO_BP_DR_CELL-ADHESION	8	Up	0.243959
GO_BP_DR_AMINO_ACID_TRANSMEMBRANE_TRANSPORT	11	Down	0.245157
GO_BP_DR_DNA_REPAIR	87	Up	0.245582
GO_MF_DR_SEQUENCE-SPECIFIC_DNA_BINDING	203	Up	0.24644
GO_MF_DR_OXIDOREDUCTASE_ACTIVITY_ACTING_ON_NADH_OR_NADPH	9	Down	0.246676
GO_BP_DR_DETERMINATION_LEFT_RIGHT_SYMMETRY	35	Up	0.249377
GO_CC_DR_CLATHRIN_ADAPTOR_COMPLEX	19	Up	0.250708
GO_MF_DR_DNA-DEPENDENT_ATPASE_ACTIVITY	8	Up	0.251546
GO_MF_DR_ION_CHANNEL_ACTIVITY	57	Down	0.252131
GO_BP_DR_DIFFERENTIATION	37	Up	0.254308
GO_CC_DR_PROTEASOME_CORE_COMPLEX_ALPHA-SUBUNIT_COMPLEX	8	Down	0.254372
GO_BP_DR_TRNA_AMINOACYLATION	6	Up	0.254777
GO_BP_DR_NUCLEOBASE-CONTAINING_COMPOUND_METABOLIC_PROCESS	26	Up	0.255602
GO_MF_DR_ACID-AMINO_ACID_LIGASE_ACTIVITY	64	Up	0.256548
GO_MF_DR_PROTEIN_KINASE_BINDING	21	Down	0.256911
GO_BP_DR_CARBOHYDRATE_METABOLIC_PROCESS	99	Down	0.257723
GO_CC_DR_CILIUM	18	Down	0.258719
GO_BP_DR_GLUTAMINE_METABOLIC_PROCESS	6	Up	0.258733
GO_BP_DR_RNA_SPLICING	28	Up	0.259337
GO_BP_DR_RETINA_LAYER_FORMATION	13	Up	0.25966
GO_MF_DR_FLAVIN_ADENINE_DINUCLEOTIDE_BINDING	37	Down	0.261836
GO_MF_DR_EXTRACELLULAR_MATRIX_STRUCTURAL_CONSTITUENT	6	Up	0.262497
GO_BP_DR_PROTEIN_UBIQUITINATION_UBIQUITIN-DEPENDENT_PROTEIN_CATABOLIC_PROCESS	10	Up	0.262898
GO_BP_DR_CYTOKINESIS	6	Down	0.264786
GO_BP_DR_MICROTUBULE-BASED_MOVEMENT	49	Up	0.26511
GO_BP_DR_RRNA_PROCESSING	22	Up	0.265206
GO_BP_DR_MIDBRAIN-HINDBRAIN_BOUNDARY_DEVELOPMENT	8	Up	0.269701
GO_MF_DR_CALCIUM_CHANNEL_ACTIVITY	11	Down	0.271035
GO_BP_DR_REGULATION_ION_TRANSMEMBRANE_TRANSPORT	22	Down	0.276646
GO_BP_DR_ATP_SYNTHESIS_COUPLED_PROTON_TRANSPORT	17	Up	0.27785
GO_BP_DR_REGULATION_SIGNAL_TRANSDUCTION	10	Up	0.280446
GO_MF_DR_LIGASE_ACTIVITY	93	Up	0.281821
GO_MF_DR_TRANSMEMBRANE_SIGNALING_RECEPTOR_ACTIVITY	24	Up	0.282237
GO_MF_DR_NON-MEMBRANE_SPANNING_PROTEIN_TYROSINE_KINASE_ACTIVITY	8	Up	0.282359
GO_MF_DR_HISTONE_ACETYLTRANSFERASE_ACTIVITY	7	Up	0.283714
GO_BP_DR_HISTONE_ACETYLATION	7	Up	0.283714
GO_MF_DR_PHOSPHATIDYLINOSITOL_BINDING	40	Up	0.287098
GO_MF_DR_SERINE-TYPE_ENDOPEPTIDASE_INHIBITOR_ACTIVITY	16	Up	0.289167
GO_BP_DR_VACUOLAR_TRANSPORT	8	Down	0.290967
GO_MF_DR_TRANSCRIPTION_REGULATORY_REGION_SEQUENCE-SPECIFIC_DNA_BINDING	6	Down	0.291637
GO_BP_DR_VASCULATURE_DEVELOPMENT	11	Up	0.292118
GO_BP_DR_INDUCTION_APOPTOSIS	7	Up	0.292681
GO_BP_DR_SMALL_GTPASE_MEDIATED_SIGNAL_TRANSDUCTION	156	Down	0.292865
GO_CC_DR_KINESIN_COMPLEX	6	Down	0.294624
GO_BP_DR_KIDNEY_DEVELOPMENT	7	Up	0.295476
GO_CC_DR_EXTRACELLULAR_REGION	85	Down	0.296591
GO_BP_DR_TRANSLATIONAL_INITIATION	48	Up	0.298069
GO_BP_DR_CARBOHYDRATE_TRANSMEMBRANE_TRANSPORT	7	Down	0.298118
GO_BP_DR_RESPONSE_TO_STRESS	28	Up	0.299118
GO_CC_DR_SEPTIN_COMPLEX	8	Down	0.299408
GO_BP_DR_RESPONSE_TO_BACTERIUM	6	Up	0.299875
GO_MF_DR_OXIDOREDUCTASE_PAIRED_DONORS_MOLECULAR_OXYGEN_REDUCED_FLAVIN_OR_FLAVOPROTEIN_ONE_ATOM_OXYGEN	7	Up	0.300893
GO_BP_DR_CYTOKINE-MEDIATED_SIGNALING_PATHWAY	6	Down	0.301231
GO_CC_DR_RETROMER_COMPLEX	7	Down	0.301726
GO_BP_DR_CARBOHYDRATE_TRANSPORT	11	Down	0.304688
GO_BP_DR_PROTEIN_TRANSPORT	193	Down	0.304854
GO_BP_DR_BRAIN_DEVELOPMENT	31	Up	0.307554
GO_BP_DR_TRANSCRIPTION_FROM_RNA_POLYMERASE_II_PROMOTER	7	Up	0.307901
GO_BP_DR_METHYLATION	85	Up	0.308127
GO_MF_DR_TRANSLATION_INITIATION_FACTOR_ACTIVITY	47	Up	0.308143
GO_MF_DR_ISOMERASE_ACTIVITY	40	Up	0.311496
GO_BP_DR_UMP_BIOSYNTHETIC_PROCESS	7	Up	0.312629
GO_MF_DR_CALCIUM-TRANSPORTING_ATPASE_ACTIVITY	8	Up	0.312846
GO_BP_DR_DIGESTIVE_TRACT_DEVELOPMENT	14	Up	0.3169
GO_MF_DR_SERINE-TYPE_PEPTIDASE_ACTIVITY	22	Up	0.317177
GO_BP_DR_RETINA_MORPHOGENESIS_IN_CAMERA-TYPE_EYE	9	Up	0.321297
GO_BP_DR_NUCLEOTIDE_PHOSPHORYLATION	6	Up	0.323288
GO_BP_DR_CARTILAGE_MORPHOGENESIS	7	Up	0.326583
GO_MF_DR_MRNA_BINDING	6	Up	0.32916
GO_BP_DR_NEGATIVE_DNA-DEPENDENT	27	Up	0.332134
GO_BP_DR_EPITHELIAL_TO_MESENCHYMAL_TRANSITION	6	Up	0.332383
GO_CC_DR_GOLGI_CISTERNA_MEMBRANE	7	Down	0.33399
GO_CC_DR_GOLGI_APPARATUS	76	Down	0.33469
GO_MF_DR_ACTIN_BINDING	92	Up	0.33534
GO_BP_DR_METAL_ION_TRANSPORT	9	Up	0.33849
GO_BP_DR_MUSCLE_ORGAN_DEVELOPMENT	10	Up	0.338802
GO_BP_DR_EXOCRINE_PANCREAS_DEVELOPMENT	12	Up	0.338885
GO_MF_DR_PEPTIDASE_ACTIVITY	117	Down	0.34158
GO_BP_DR_PATTERNING_BLOOD_VESSELS	7	Up	0.342483
GO_CC_DR_PROTEINACEOUS_EXTRACELLULAR_MATRIX	11	Up	0.342783
GO_BP_DR_PATTERN_SPECIFICATION_PROCESS	17	Up	0.346293
GO_MF_DR_OXIDOREDUCTASE_PAIRED_DONORS_MOLECULAR_OXYGEN_2-OXOGLUTARATE_ONE_ATOM_EACH_OXYGEN_BOTH_DONORS	18	Up	0.346308
GO_CC_DR_NUCLEAR_ENVELOPE	8	Down	0.348745
GO_BP_DR_POSITIVE_REGULATION_I-KAPPAB_KINASE_NF-KAPPAB_CASCADE	7	Up	0.354807
GO_MF_DR_CATALYTIC_ACTIVITY	420	Down	0.356266
GO_BP_DR_GASTRULATION_WITH_MOUTH_FORMING_SECOND	9	Up	0.356587
GO_BP_DR_PSEUDOURIDINE_SYNTHESIS	12	Up	0.357227
GO_BP_DR_ENDODERM_FORMATION	8	Down	0.357882
GO_BP_DR_EYE_DEVELOPMENT	8	Down	0.357897
GO_MF_DR_S-ADENOSYLMETHIONINE-DEPENDENT_METHYLTRANSFERASE_ACTIVITY	7	Up	0.359439
GO_BP_DR_RESPONSE_TO_IONIZING_RADIATION	6	Down	0.360355
GO_MF_DR_PHOSPHOPROTEIN_PHOSPHATASE_ACTIVITY	58	Up	0.362456
GO_BP_DR_PANCREAS_DEVELOPMENT	14	Up	0.362808
GO_BP_DR_EMBRYONIC_HEMOPOIESIS	8	Up	0.366294
GO_BP_DR_RNA_MODIFICATION	13	Up	0.366401
GO_CC_DR_MYOSIN_COMPLEX	32	Up	0.36691
GO_BP_DR_MRNA_PROCESSING	59	Up	0.366917
GO_BP_DR_CANONICAL_WNT_RECEPTOR_SIGNALING_PATHWAY	21	Up	0.368249
GO_MF_DR_ELECTRON_CARRIER_ACTIVITY	53	Down	0.36861
GO_BP_DR_POSITIVE_REGULATION_GTPASE_ACTIVITY	35	Down	0.369181
GO_BP_DR_GLYCEROL_ETHER_METABOLIC_PROCESS	7	Up	0.370932
GO_BP_DR_HEART_DEVELOPMENT	53	Up	0.371356
GO_CC_DR_SPINDLE	10	Up	0.372027
GO_BP_DR_TRANSFORMING_GROWTH_FACTOR_BETA_RECEPTOR_SIGNALING_PATHWAY	14	Down	0.372725
GO_MF_DR_TRANSFERASE_ACTIVITY_TRANSFERRING_ACYL_GROUPS_OTHER_THAN_AMINO-ACYL_GROUPS	30	Up	0.372964
GO_MF_DR_RECEPTOR_ACTIVITY	267	Up	0.374436
GO_BP_DR_DNA_METABOLIC_PROCESS	10	Up	0.375525
GO_BP_DR_REGULATION_RHO_PROTEIN_SIGNAL_TRANSDUCTION	54	Up	0.375593
GO_MF_DR_RHO_GUANYL-NUCLEOTIDE_EXCHANGE_FACTOR_ACTIVITY	54	Up	0.375593
GO_MF_DR_GUANYL-NUCLEOTIDE_EXCHANGE_FACTOR_ACTIVITY	42	Up	0.37575
GO_BP_DR_NOTCH_SIGNALING_PATHWAY	25	Up	0.379187
GO_MF_DR_TRANSPORTER_ACTIVITY	44	Down	0.37976
GO_CC_DR_CONDENSED_CHROMOSOME_KINETOCHORE	8	Down	0.380139
GO_BP_DR_RESPONSE_TO_CHEMICAL_STIMULUS	23	Down	0.381847
GO_MF_DR_GROWTH_FACTOR_ACTIVITY	15	Up	0.384304
GO_BP_DR_NEGATIVE_REGULATION_WNT_RECEPTOR_SIGNALING_PATHWAY	10	Up	0.385358
GO_CC_DR_MITOCHONDRIAL_OUTER_MEMBRANE	22	Down	0.386465
GO_MF_DR_SNAP_RECEPTOR_ACTIVITY	7	Down	0.387185
GO_CC_DR_EXTRACELLULAR_SPACE	24	Up	0.387334
GO_BP_DR_DORSAL_CONVERGENCE	8	Up	0.388314
GO_MF_DR_MICROTUBULE_BINDING	19	Up	0.390407
GO_MF_DR_GTP_BINDING	237	Down	0.39053
GO_MF_DR_CALCIUM_ION_BINDING	220	Up	0.392614
GO_BP_DR_CELLULAR_METABOLIC_PROCESS	27	Down	0.393061
GO_MF_DR_COENZYME_BINDING	30	Down	0.394739
GO_MF_DR_CARBOHYDRATE_BINDING	62	Down	0.395402
GO_CC_DR_KINETOCHORE	9	Down	0.396479
GO_BP_DR_CONVERGENT_EXTENSION_GASTRULATION	34	Up	0.396943
GO_BP_DR_DNA_METHYLATION	8	Up	0.39766
GO_CC_DR_LYSOSOME	17	Down	0.398077
GO_CC_DR_Z_DISC	9	Down	0.39876
GO_MF_DR_NAD_ADP-RIBOSYLTRANSFERASE_ACTIVITY	12	Down	0.400272
GO_MF_DR_DOUBLE-STRANDED_RNA_BINDING	18	Up	0.401317
GO_MF_DR_TRANSITION_METAL_ION_BINDING	10	Up	0.401494
GO_BP_DR_MRNA_TRANSPORT	10	Down	0.401717
GO_BP_DR_FIN_DEVELOPMENT	8	Up	0.405482
GO_BP_DR_ATP_BIOSYNTHETIC_PROCESS	17	Up	0.406645
GO_BP_DR_AUTOPHAGY	12	Down	0.40706
GO_BP_DR_POSITIVE_DNA-DEPENDENT	35	Down	0.407603
GO_BP_DR_NEGATIVE_REGULATION_CANONICAL_WNT_RECEPTOR_SIGNALING_PATHWAY	6	Up	0.40802
GO_MF_DR_GUANYL_NUCLEOTIDE_BINDING	30	Down	0.408308
GO_BP_DR_TRANSPORT	356	Down	0.412953
GO_MF_DR_CYTOSKELETAL_ADAPTOR_ACTIVITY	12	Down	0.412997
GO_BP_DR_RETINOIC_ACID_RECEPTOR_SIGNALING_PATHWAY	7	Up	0.4131
GO_BP_DR_DETERMINATION_HEART_LEFT_RIGHT_ASYMMETRY	6	Up	0.413142
GO_BP_DR_AUTOPHAGIC_VACUOLE_ASSEMBLY	7	Down	0.413691
GO_CC_DR_EXTRACELLULAR_MATRIX	10	Down	0.414899
GO_MF_DR_MAGNESIUM_ION_TRANSMEMBRANE_TRANSPORTER_ACTIVITY	6	Down	0.416365
GO_CC_DR_MITOCHONDRIAL_MEMBRANE	10	Down	0.41998
GO_BP_DR_REGULATION_ANION_TRANSPORT	13	Down	0.421414
GO_MF_DR_TRANSFERASE_ACTIVITY_TRANSFERRING_HEXOSYL_GROUPS	25	Up	0.421512
GO_MF_DR_PROTEIN_HOMODIMERIZATION_ACTIVITY	20	Up	0.421955
GO_BP_DR_GONAD_DEVELOPMENT	9	Up	0.428881
GO_MF_DR_OXIDOREDUCTASE_ACTIVITY_ACTING_ON_THE_CH-CH_GROUP_DONORS	19	Down	0.430687
GO_BP_DR_NEGATIVE_REGULATION_APOPTOTIC_PROCESS	22	Down	0.43207
GO_MF_DR_HYDROLASE_ACTIVITY_ACTING_ON_CARBON-NITROGEN_BUT_NOT_PEPTIDE_BONDS_IN_LINEAR_AMIDES	9	Up	0.435008
GO_CC_DR_COLLAGEN	12	Up	0.437658
GO_BP_DR_CELLULAR_PROTEIN_METABOLIC_PROCESS	13	Down	0.441312
GO_MF_DR_G-PROTEIN_COUPLED_RECEPTOR_ACTIVITY	39	Up	0.441895
GO_BP_DR_CHROMATIN_MODIFICATION	29	Up	0.445352
GO_MF_DR_RHO_GTPASE_BINDING	6	Up	0.447077
GO_CC_DR_PLASMA_MEMBRANE	119	Up	0.447613
GO_CC_DR_CHROMATIN	7	Up	0.44837
GO_BP_DR_BIOSYNTHETIC_PROCESS	46	Down	0.449571
GO_BP_DR_CHLORIDE_TRANSPORT	13	Down	0.45001
GO_BP_DR_ION_TRANSMEMBRANE_TRANSPORT	99	Down	0.451041
GO_BP_DR_PROTEIN_COMPLEX_ASSEMBLY	8	Up	0.453316
GO_MF_DR_L-ASCORBIC_ACID_BINDING	7	Up	0.453561
GO_BP_DR_MELANOSOME_TRANSPORT	9	Up	0.456008
GO_MF_DR_TRANSFERASE_ACTIVITY_TRANSFERRING_GLYCOSYL_GROUPS	74	Down	0.456064
GO_BP_DR_CYCLE_ARREST	8	Up	0.456321
GO_BP_DR_PROTEIN_IMPORT_MITOCHONDRIAL_INNER_MEMBRANE	6	Up	0.456695
GO_CC_DR_MITOCHONDRIAL_INTERMEMBRANE_SPACE_PROTEIN_TRANSPORTER_COMPLEX	6	Up	0.456695
GO_BP_DR_DOUBLE-STRAND_BREAK_REPAIR	6	Up	0.456826
GO_MF_DR_HYDROLASE_ACTIVITY_ACTING_ON_ACID_ANHYDRIDES_IN_PHOSPHORUS-CONTAINING_ANHYDRIDES	14	Up	0.461342
GO_BP_DR_RNA_PROCESSING	42	Up	0.462402
GO_BP_DR_RETINAL_GANGLION_AXON_GUIDANCE	16	Up	0.464021
GO_CC_DR_LARGE_RIBOSOMAL_SUBUNIT	8	Up	0.464373
GO_MF_DR_BETA-CATENIN_BINDING	8	Up	0.464931
GO_MF_DR_SERINE-TYPE_ENDOPEPTIDASE_ACTIVITY	26	Up	0.466318
GO_BP_DR_PROTEASOMAL_UBIQUITIN-DEPENDENT_PROTEIN_CATABOLIC_PROCESS	10	Up	0.467577
GO_CC_DR_SMALL_RIBOSOMAL_SUBUNIT	8	Up	0.469127
GO_BP_DR_PROTEIN_DEPHOSPHORYLATION	73	Up	0.4705
GO_MF_DR_TRANSMEMBRANE_TRANSPORTER_ACTIVITY	15	Down	0.471144
GO_MF_DR_AMINO_ACID_TRANSMEMBRANE_TRANSPORTER_ACTIVITY	8	Down	0.472157
GO_MF_DR_STEROID_BINDING	6	Up	0.472673
GO_MF_DR_HYDROLASE_ACTIVITY	438	Down	0.474969
GO_MF_DR_IRON-SULFUR_CLUSTER_BINDING	29	Down	0.475633
GO_MF_DR_MAGNESIUM_ION_BINDING	68	Up	0.476205
GO_MF_DR_CALCIUM-DEPENDENT_PHOSPHOLIPID_BINDING	7	Down	0.479597
GO_CC_DR_TIGHT_JUNCTION	20	Up	0.480067
GO_BP_DR_PHOTOPERIODISM	7	Down	0.48015
GO_BP_DR_CARBOHYDRATE_PHOSPHORYLATION	6	Down	0.48179
GO_MF_DR_UBIQUITIN-SPECIFIC_PROTEASE_ACTIVITY	8	Up	0.482367
GO_MF_DR_PHOSPHATASE_ACTIVITY	78	Down	0.482442
GO_BP_DR_FROM_RNA_POLYMERASE_II_PROMOTER	46	Down	0.484023
GO_CC_DR_CULLIN-RING_UBIQUITIN_LIGASE_COMPLEX	7	Up	0.484954
GO_MF_DR_UBIQUITIN_PROTEIN_LIGASE_BINDING	7	Up	0.484954
GO_BP_DR_ION_TRANSPORT	91	Up	0.485082
GO_CC_DR_MICROTUBULE_ORGANIZING_CENTER	15	Down	0.488074
GO_BP_DR_HINDBRAIN_DEVELOPMENT	13	Up	0.488607
GO_BP_DR_BLOOD_VESSEL_MORPHOGENESIS	12	Up	0.488719
GO_BP_DR_CELL-MATRIX_ADHESION	11	Up	0.490076
GO_BP_DR_PROTEIN_UBIQUITINATION	54	Up	0.49223
GO_BP_DR_EMBRYONIC_HEART_TUBE_MORPHOGENESIS	10	Up	0.495304
GO_BP_DR_CATION_TRANSPORT	52	Down	0.499695
GO_BP_DR_MAPK_CASCADE	12	Up	0.500755
GO_MF_DR_MAP_KINASE_ACTIVITY	12	Up	0.500755
GO_CC_DR_NUCLEAR_MEMBRANE	6	Down	0.501381
GO_BP_DR_FERROUS_IRON_TRANSPORT	17	Down	0.502812
GO_MF_DR_FERROUS_IRON_TRANSMEMBRANE_TRANSPORTER_ACTIVITY	17	Down	0.502812
GO_BP_DR_REGULATION_ARF_GTPASE_ACTIVITY	20	Down	0.506053
GO_MF_DR_ARF_GTPASE_ACTIVATOR_ACTIVITY	20	Down	0.506053
GO_BP_DR_CILIUM_MORPHOGENESIS	12	Down	0.506165
GO_CC_DR_ENDOPLASMIC_RETICULUM	93	Down	0.506849
GO_BP_DR_HISTONE_LYSINE_METHYLATION	15	Up	0.507123
GO_BP_DR_PROTEIN_TARGETING_TO_MITOCHONDRION	9	Down	0.513528
GO_BP_DR_AXON_EXTENSION_DEVELOPMENT	7	Up	0.519437
GO_BP_DR_INTRACELLULAR_TRANSPORT	11	Up	0.519437
GO_BP_DR_MIGRATION	8	Up	0.519715
GO_BP_DR_PROTEIN_METHYLATION	15	Up	0.520462
GO_BP_DR_HOMOPHILIC_ADHESION	20	Down	0.521151
GO_BP_DR_NUCLEIC_ACID_PHOSPHODIESTER_BOND_HYDROLYSIS	50	Down	0.52159
GO_BP_DR_REGULATION_PROLIFERATION	6	Up	0.521745
GO_BP_DR_CELLULAR_AMINO_ACID_BIOSYNTHETIC_PROCESS	7	Up	0.524896
GO_BP_DR_BASE-EXCISION_REPAIR	9	Down	0.526962
GO_MF_DR_ASPARTIC-TYPE_ENDOPEPTIDASE_ACTIVITY	8	Up	0.53188
GO_BP_DR_RESPONSE_TO_OXIDATIVE_STRESS	6	Up	0.532121
GO_BP_DR_PROTEOGLYCAN_BIOSYNTHETIC_PROCESS	7	Down	0.532429
GO_BP_DR_GTP_CATABOLIC_PROCESS	140	Up	0.532936
GO_BP_DR_DEPHOSPHORYLATION	105	Down	0.536477
GO_MF_DR_3-HYDROXYACYL-COA_DEHYDROGENASE_ACTIVITY	6	Down	0.536805
GO_MF_DR_HEAT_SHOCK_PROTEIN_BINDING	43	Down	0.539564
GO_BP_DR_PROTEIN_FOLDING	84	Up	0.540414
GO_MF_DR_IDENTICAL_PROTEIN_BINDING	13	Up	0.540771
GO_BP_DR_COENZYME_A_BIOSYNTHETIC_PROCESS	6	Up	0.546594
GO_BP_DR_PHOSPHORYLATION	316	Up	0.547637
GO_MF_DR_TUBULIN-TYROSINE_LIGASE_ACTIVITY	6	Up	0.547827
GO_MF_DR_ADENYLATE_CYCLASE_ACTIVITY	6	Down	0.548856
GO_BP_DR_CARBOHYDRATE_BIOSYNTHETIC_PROCESS	6	Down	0.549479
GO_MF_DR_ACYL-COA_DEHYDROGENASE_ACTIVITY	13	Down	0.551701
GO_MF_DR_PDZ_DOMAIN_BINDING	10	Up	0.553035
GO_MF_DR_MOTOR_ACTIVITY	33	Up	0.553654
GO_MF_DR_PROTEIN_SERINE_THREONINE_KINASE_ACTIVITY	223	Up	0.555673
GO_BP_DR_SOMITOGENESIS	32	Up	0.556241
GO_BP_DR_GLYCOLYSIS	13	Up	0.557857
GO_MF_DR_PHOSPHOLIPID_BINDING	187	Up	0.559097
GO_BP_DR_REGULATION_SMALL_GTPASE_MEDIATED_SIGNAL_TRANSDUCTION	31	Down	0.560207
GO_MF_DR_EPHRIN_RECEPTOR_ACTIVITY	10	Down	0.566404
GO_BP_DR_PROLIFERATION	11	Up	0.566415
GO_MF_DR_CYSTEINE-TYPE_ENDOPEPTIDASE_INHIBITOR_ACTIVITY	6	Up	0.568129
GO_MF_DR_FMN_BINDING	8	Down	0.570361
GO_MF_DR_GTPASE_ACTIVITY	169	Up	0.572087
GO_MF_DR_POTASSIUM_CHANNEL_ACTIVITY	6	Down	0.575683
GO_BP_DR_MYOFIBRIL_ASSEMBLY	6	Up	0.579472
GO_BP_DR_INTRACELLULAR_PROTEIN_TRANSPORT	181	Up	0.582855
GO_BP_DR_NERVOUS_SYSTEM_DEVELOPMENT	20	Down	0.585966
GO_BP_DR_POSITIVE_REGULATION_PROLIFERATION	7	Down	0.588175
GO_MF_DR_KINASE_ACTIVITY	305	Up	0.588906
GO_MF_DR_PROTEIN_TYROSINE_SERINE_THREONINE_PHOSPHATASE_ACTIVITY	28	Up	0.58986
GO_MF_DR_2_IRON_2_SULFUR_CLUSTER_BINDING	11	Down	0.593067
GO_CC_DR_ANAPHASE-PROMOTING_COMPLEX	7	Down	0.593213
GO_BP_DR_HEMOPOIETIC_STEM_DIFFERENTIATION	6	Up	0.600767
GO_BP_DR_MELANOCYTE_DIFFERENTIATION	9	Up	0.60112
GO_MF_DR_ADENOSINE_DEAMINASE_ACTIVITY	6	Down	0.604348
GO_MF_DR_ACID_PHOSPHATASE_ACTIVITY	9	Up	0.604789
GO_CC_DR_SYNAPSE	14	Down	0.605618
GO_BP_DR_MAGNESIUM_ION_TRANSPORT	7	Down	0.606081
GO_BP_DR_TRANSCRIPTION_DNA-DEPENDENT	218	Up	0.606579
GO_BP_DR_EPHRIN_RECEPTOR_SIGNALING_PATHWAY	11	Down	0.607725
GO_MF_DR_METHYLTRANSFERASE_ACTIVITY	97	Up	0.612132
GO_MF_DR_TRANSMEMBRANE_RECEPTOR_PROTEIN_TYROSINE_KINASE_ACTIVITY	15	Down	0.614034
GO_CC_DR_SPINDLE_POLE	6	Down	0.614667
GO_MF_DR_VOLTAGE-GATED_CHLORIDE_CHANNEL_ACTIVITY	9	Down	0.615268
GO_CC_DR_PEROXISOME	11	Up	0.617875
GO_BP_DR_DEFINITIVE_HEMOPOIESIS	6	Up	0.618276
GO_BP_DR_MICROTUBULE_CYTOSKELETON_ORGANIZATION	10	Up	0.622025
GO_CC_DR_MITOCHONDRIAL_PROTON-TRANSPORTING_ATP_SYNTHASE_COMPLEX_COUPLING_FACTOR_FO	7	Up	0.623193
GO_MF_DR_PHOSPHATIDYLINOSITOL_PHOSPHOLIPASE_C_ACTIVITY	10	Up	0.623736
GO_BP_DR_LIPID_BIOSYNTHETIC_PROCESS	9	Up	0.624324
GO_BP_DR_GLYCEROL_METABOLIC_PROCESS	7	Up	0.624437
GO_BP_DR_INTEGRIN-MEDIATED_SIGNALING_PATHWAY	19	Up	0.627477
GO_BP_DR_ANION_TRANSPORT	12	Up	0.627894
GO_MF_DR_ATPASE_ACTIVITY_COUPLED_TO_TRANSMEMBRANE_MOVEMENT_SUBSTANCES	23	Up	0.628344
GO_MF_DR_COPPER_ION_BINDING	12	Up	0.630875
GO_MF_DR_PSEUDOURIDINE_SYNTHASE_ACTIVITY	13	Up	0.631729
GO_BP_DR_NEGATIVE_REGULATION_CATALYTIC_ACTIVITY	6	Up	0.633096
GO_MF_DR_CALCIUM-DEPENDENT_CYSTEINE-TYPE_ENDOPEPTIDASE_ACTIVITY	8	Up	0.633239
GO_BP_DR_DNA_REPLICATION	54	Up	0.633553
GO_MF_DR_PHOSPHOGLUCONATE_DEHYDROGENASE_DECARBOXYLATING_ACTIVITY	6	Down	0.635805
GO_BP_DR_GLUTATHIONE_BIOSYNTHETIC_PROCESS	7	Up	0.636663
GO_BP_DR_POSITIVE_REGULATION_RAB_GTPASE_ACTIVITY	21	Up	0.639881
GO_BP_DR_GLUCOSE_METABOLIC_PROCESS	6	Up	0.641588
GO_MF_DR_PHOSPHOLIPASE_C_ACTIVITY	11	Up	0.642968
GO_BP_DR_PROTEIN_CATABOLIC_PROCESS	19	Down	0.643317
GO_BP_DR_GPI_ANCHOR_BIOSYNTHETIC_PROCESS	11	Down	0.643847
GO_CC_DR_PREFOLDIN_COMPLEX	9	Up	0.644453
GO_BP_DR_DIVISION	59	Down	0.646237
GO_BP_DR_POTASSIUM_ION_TRANSMEMBRANE_TRANSPORT	13	Down	0.648363
GO_MF_DR_PROTEIN_SERINE_THREONINE_PHOSPHATASE_ACTIVITY	15	Up	0.649172
GO_BP_DR_SODIUM_ION_TRANSPORT	12	Down	0.655386
GO_BP_DR_SODIUM_ION_EXPORT	18	Up	0.655424
GO_BP_DR_POSITIVE_REGULATION_CYSTEINE-TYPE_ENDOPEPTIDASE_APOPTOTIC_PROCESS	7	Up	0.655629
GO_BP_DR_RIBOSOME_BIOGENESIS	29	Down	0.656729
GO_BP_DR_EXTRACELLULAR_MATRIX_ORGANIZATION	6	Up	0.656756
GO_MF_DR_TRANSLATION_ELONGATION_FACTOR_ACTIVITY	14	Up	0.661478
GO_BP_DR_RESPONSE_TO_LIGHT_STIMULUS	8	Down	0.664235
GO_MF_DR_PROTEIN_TRANSPORTER_ACTIVITY	36	Up	0.664629
GO_BP_DR_NEGATIVE_REGULATION_CYSTEINE-TYPE_ENDOPEPTIDASE_APOPTOTIC_PROCESS	6	Down	0.66507
GO_BP_DR_PIGMENT_GRANULE_AGGREGATION_IN_CENTER	6	Up	0.666292
GO_BP_DR_REGULATION_ACTIN_FILAMENT_POLYMERIZATION	7	Up	0.666425
GO_BP_DR_STEROID_HORMONE_MEDIATED_SIGNALING_PATHWAY	27	Down	0.666659
GO_MF_DR_STEROID_HORMONE_RECEPTOR_ACTIVITY	27	Down	0.666659
GO_BP_DR_INTRACELLULAR_SIGNAL_TRANSDUCTION	129	Down	0.669794
GO_MF_DR_HYDROLASE_ACTIVITY_ACTING_ON_ACID_ANHYDRIDES	14	Up	0.67022
GO_MF_DR_WNT-ACTIVATED_RECEPTOR_ACTIVITY	8	Up	0.672873
GO_BP_DR_EYE_PHOTORECEPTOR_DEVELOPMENT	9	Up	0.673565
GO_BP_DR_ACTIN_CYTOSKELETON_ORGANIZATION	22	Up	0.675278
GO_MF_DR_DNA-DIRECTED_DNA_POLYMERASE_ACTIVITY	15	Up	0.678456
GO_BP_DR_PROTEIN_GLYCOSYLATION	29	Down	0.679284
GO_BP_DR_ER_TO_GOLGI_VESICLE-MEDIATED_TRANSPORT	7	Up	0.679364
GO_BP_DR_ENDOCYTOSIS	10	Up	0.683495
GO_BP_DR_TRNA_MODIFICATION	8	Down	0.684036
GO_CC_DR_MITOCHONDRIAL_MATRIX	9	Up	0.684783
GO_CC_DR_CYTOPLASMIC_VESICLE	10	Down	0.68681
GO_BP_DR_REGULATION_RAB_GTPASE_ACTIVITY	34	Down	0.686824
GO_MF_DR_RAB_GTPASE_ACTIVATOR_ACTIVITY	34	Down	0.686824
GO_BP_DR_DORSAL_VENTRAL_PATTERN_FORMATION	34	Down	0.688327
GO_MF_DR_RNA_METHYLTRANSFERASE_ACTIVITY	7	Up	0.689769
GO_BP_DR_NEGATIVE_REGULATION_TRANSLATIONAL_INITIATION	6	Down	0.694214
GO_BP_DR_PHOSPHATIDYLINOSITOL_METABOLIC_PROCESS	6	Down	0.695399
GO_MF_DR_PHOSPHATIDYLINOSITOL_PHOSPHATE_KINASE_ACTIVITY	6	Down	0.695399
GO_BP_DR_NEUROPEPTIDE_SIGNALING_PATHWAY	9	Down	0.695709
GO_MF_DR_SELENIUM_BINDING	9	Down	0.697781
GO_BP_DR_REGULATION_CYCLE	30	Down	0.698862
GO_BP_DR_KUPFFERS_VESICLE_DEVELOPMENT	18	Up	0.701042
GO_BP_DR_ADHESION	57	Up	0.701384
GO_MF_DR_CATION_BINDING	26	Down	0.701748
GO_BP_DR_HEMOPOIESIS	22	Down	0.702434
GO_BP_DR_ISOPRENOID_BIOSYNTHETIC_PROCESS	7	Down	0.704723
GO_MF_DR_WNT-PROTEIN_BINDING	9	Up	0.70651
GO_CC_DR_POSTSYNAPTIC_MEMBRANE	13	Up	0.707977
GO_MF_DR_PROTEIN_DOMAIN_SPECIFIC_BINDING	19	Up	0.708779
GO_MF_DR_VOLTAGE-GATED_ION_CHANNEL_ACTIVITY	8	Down	0.708924
GO_BP_DR_SPERMATOGENESIS	8	Up	0.70918
GO_BP_DR_INTRACELLULAR_PROTEIN_KINASE_CASCADE	9	Down	0.718687
GO_BP_DR_CYTOSKELETON_ORGANIZATION	16	Up	0.722159
GO_CC_DR_CYTOSOLIC_SMALL_RIBOSOMAL_SUBUNIT	6	Up	0.725533
GO_MF_DR_PROTEIN_KINASE_ACTIVITY	360	Up	0.727433
GO_MF_DR_GTPASE_BINDING	9	Down	0.728811
GO_MF_DR_CHAPERONE_BINDING	8	Down	0.729804
GO_MF_DR_GTPASE_ACTIVATOR_ACTIVITY	32	Down	0.7308
GO_CC_DR_CENTROSOME	7	Down	0.731266
GO_BP_DR_MISMATCH_REPAIR	6	Down	0.734375
GO_MF_DR_MISMATCHED_DNA_BINDING	6	Down	0.734375
GO_CC_DR_LAMELLIPODIUM	6	Up	0.734973
GO_MF_DR_OXIDOREDUCTASE_ACTIVITY_ACTING_ON_CH-OH_GROUP_DONORS	8	Down	0.735191
GO_MF_DR_INTRAMOLECULAR_TRANSFERASE_ACTIVITY_PHOSPHOTRANSFERASES	6	Down	0.735421
GO_MF_DR_CARBOXYPEPTIDASE_ACTIVITY	8	Up	0.738198
GO_MF_DR_N-ACETYLTRANSFERASE_ACTIVITY	13	Up	0.738552
GO_CC_DR_DYNEIN_COMPLEX	8	Down	0.738929
GO_MF_DR_UNFOLDED_PROTEIN_BINDING	56	Down	0.740195
GO_BP_DR_REGULATION_APOPTOTIC_PROCESS	30	Down	0.741993
GO_BP_DR_PEPTIDYL-LYSINE_METHYLATION	13	Up	0.742181
GO_BP_DR_NEGATIVE_REGULATION_PROLIFERATION	6	Up	0.742486
GO_MF_DR_OXIDOREDUCTASE_ACTIVITY_ACTING_ON_THE_CH-OH_GROUP_DONORS_NAD_OR_NADP_AS_ACCEPTOR	34	Up	0.74326
GO_MF_DR_UBIQUITIN-PROTEIN_LIGASE_ACTIVITY	61	Up	0.745687
GO_BP_DR_TRANSLATIONAL_ELONGATION	17	Up	0.746537
GO_MF_DR_PROTEIN_METHYLTRANSFERASE_ACTIVITY	13	Up	0.746903
GO_BP_DR_TAIL_MORPHOGENESIS	6	Down	0.748979
GO_MF_DR_G-PROTEIN_BETA_GAMMA-SUBUNIT_COMPLEX_BINDING	8	Down	0.751997
GO_MF_DR_RECEPTOR_SIGNALING_PROTEIN_ACTIVITY	9	Down	0.760071
GO_BP_DR_POTASSIUM_ION_TRANSPORT	9	Down	0.764943
GO_BP_DR_TRANSCRIPTION_INITIATION_FROM_RNA_POLYMERASE_II_PROMOTER	9	Up	0.765113
GO_BP_DR_PEPTIDYL-TYROSINE_DEPHOSPHORYLATION	51	Up	0.765957
GO_MF_DR_CATION_TRANSMEMBRANE_TRANSPORTER_ACTIVITY	13	Up	0.766071
GO_CC_DR_UBIQUITIN_LIGASE_COMPLEX	16	Up	0.768246
GO_BP_DR_RECEPTOR-MEDIATED_ENDOCYTOSIS	7	Up	0.771199
GO_MF_DR_SMALL_GTPASE_REGULATOR_ACTIVITY	15	Down	0.771854
GO_BP_DR_LIPID_TRANSPORT	20	Down	0.772245
GO_MF_DR_GALACTOSYLTRANSFERASE_ACTIVITY	9	Up	0.773753
GO_BP_DR_ERYTHROCYTE_DIFFERENTIATION	8	Down	0.774171
GO_MF_DR_SINGLE-STRANDED_DNA_BINDING	13	Up	0.775509
GO_MF_DR_4_IRON_4_SULFUR_CLUSTER_BINDING	13	Down	0.77768
GO_MF_DR_HEME_BINDING	34	Down	0.780843
GO_MF_DR_CAMP-DEPENDENT_PROTEIN_KINASE_REGULATOR_ACTIVITY	6	Down	0.78211
GO_CC_DR_FLAGELLUM	6	Down	0.782385
GO_CC_DR_OUTER_MEMBRANE-BOUNDED_PERIPLASMIC_SPACE	9	Up	0.785292
GO_MF_DR_IONOTROPIC_GLUTAMATE_RECEPTOR_ACTIVITY	9	Up	0.785292
GO_MF_DR_EXTRACELLULAR-GLUTAMATE-GATED_ION_CHANNEL_ACTIVITY	9	Up	0.785292
GO_MF_DR_METAL_ION_BINDING	641	Up	0.785975
GO_MF_DR_SOLUTEHYDROGEN_ANTIPORTER_ACTIVITY	7	Up	0.787679
GO_BP_DR_PROTEIN_PHOSPHORYLATION	370	Up	0.788967
GO_BP_DR_IONOTROPIC_GLUTAMATE_RECEPTOR_SIGNALING_PATHWAY	8	Up	0.789964
GO_MF_DR_OXIDOREDUCTASE_PAIRED_DONORS_MOLECULAR_OXYGEN	25	Down	0.792416
GO_MF_DR_ANTIPORTER_ACTIVITY	6	Down	0.799005
GO_MF_DR_PROTEIN_TYROSINE_PHOSPHATASE_ACTIVITY	57	Up	0.800445
GO_BP_DR_CENTRAL_NERVOUS_SYSTEM_DEVELOPMENT	8	Up	0.800677
GO_MF_DR_METALLOPEPTIDASE_ACTIVITY	32	Down	0.802606
GO_BP_DR_NOTOCHORD_DEVELOPMENT2	11	Up	0.802936
GO_MF_DR_ATPASE_ACTIVITY_COUPLED_TO_TRANSMEMBRANE_MOVEMENT_IONS_PHOSPHORYLATIVE_MECHANISM	26	Down	0.803418
GO_CC_DR_MEDIATOR_COMPLEX	16	Up	0.803591
GO_BP_DR_CELLULAR_PROTEIN_MODIFICATION_PROCESS	55	Down	0.803801
GO_CC_DR_MICROTUBULE	49	Up	0.805891
GO_BP_DR_CHROMOSOME_SEGREGATION	12	Up	0.80694
GO_BP_DR_REGULATION_ARF_PROTEIN_SIGNAL_TRANSDUCTION	11	Up	0.807277
GO_MF_DR_ARF_GUANYL-NUCLEOTIDE_EXCHANGE_FACTOR_ACTIVITY	11	Up	0.807277
GO_BP_DR_HEART_MORPHOGENESIS	13	Up	0.807817
GO_MF_DR_OXIDOREDUCTASE_ACTIVITY	252	Down	0.809889
GO_CC_DR_PROTEASOME_COMPLEX	33	Down	0.810611
GO_MF_DR_SCAVENGER_RECEPTOR_ACTIVITY	6	Up	0.81513
GO_MF_DR_TRANSFERASE_ACTIVITY_TRANSFERRING_PHOSPHORUS-CONTAINING_GROUPS	390	Up	0.818846
GO_BP_DR_GERM_MIGRATION	6	Down	0.819883
GO_BP_DR_G-PROTEIN_COUPLED_RECEPTOR_SIGNALING_PATHWAY	80	Down	0.824775
GO_BP_DR_FATTY_ACID_BIOSYNTHETIC_PROCESS	9	Up	0.825716
GO_MF_DR_OXIDOREDUCTASE_ACTIVITY_ACTING_ON_THE_ALDEHYDE_OR_OXO_GROUP_DONORS_NAD_OR_NADP_AS_ACCEPTOR	14	Up	0.826295
GO_CC_DR_APICAL_PLASMA_MEMBRANE	6	Down	0.827596
GO_MF_DR_RECEPTOR_BINDING	18	Up	0.828098
GO_CC_DR_HETEROTRIMERIC_G-PROTEIN_COMPLEX	12	Up	0.830153
GO_CC_DR_CYTOPLASMIC_MRNA_PROCESSING_BODY	6	Down	0.830286
GO_BP_DR_MORPHOGENESIS	20	Up	0.831861
GO_MF_DR_INOSITOL-145-TRISPHOSPHATE_3-KINASE_ACTIVITY	7	Down	0.832222
GO_MF_DR_OMEGA_PEPTIDASE_ACTIVITY	7	Down	0.832849
GO_MF_DR_METALLOENDOPEPTIDASE_ACTIVITY	49	Down	0.832926
GO_BP_DR_CYCLIC_NUCLEOTIDE_BIOSYNTHETIC_PROCESS	14	Up	0.845094
GO_MF_DR_PHOSPHORUS-OXYGEN_LYASE_ACTIVITY	14	Up	0.845094
GO_BP_DR_AXONOGENESIS	12	Up	0.846338
GO_BP_DR_PROTEOLYSIS	206	Down	0.848734
GO_BP_DR_METABOLIC_PROCESS	775	Down	0.852863
GO_BP_DR_POSITIVE_REGULATION_APOPTOTIC_PROCESS	21	Up	0.854995
GO_MF_DR_PROTEIN_KINASE_C_ACTIVITY	9	Up	0.855708
GO_MF_DR_SUGARHYDROGEN_SYMPORTER_ACTIVITY	6	Up	0.856252
GO_CC_DR_CORTEX	9	Up	0.857693
GO_BP_DR_AXON_GUIDANCE	13	Up	0.866206
GO_CC_DR_ENDOSOME_MEMBRANE	6	Up	0.866723
GO_CC_DR_INTEGRAL_TO_ENDOPLASMIC_RETICULUM_MEMBRANE	10	Down	0.868441
GO_MF_DR_SEQUENCE-SPECIFIC_DNA_BINDING_TRANSCRIPTION_FACTOR_ACTIVITY	255	Up	0.872364
GO_BP_DR_PROTEIN_HOMOOLIGOMERIZATION	18	Down	0.876881
GO_MF_DR_LYASE_ACTIVITY	40	Down	0.878003
GO_MF_DR_SIGNAL_TRANSDUCER_ACTIVITY	106	Down	0.887044
GO_BP_DR_SRP-DEPENDENT_COTRANSLATIONAL_PROTEIN_TARGETING_TO_MEMBRANE	6	Up	0.887201
GO_MF_DR_RIBONUCLEASE_ACTIVITY	6	Down	0.892633
GO_MF_DR_INSULIN_RECEPTOR_BINDING	6	Down	0.894592
GO_BP_DR_CALCIUM_ION_TRANSPORT	19	Up	0.895036
GO_MF_DR_PROTEIN_TYROSINE_KINASE_ACTIVITY	337	Up	0.895394
GO_MF_DR_MANNOSYL-OLIGOSACCHARIDE_12-ALPHA-MANNOSIDASE_ACTIVITY	7	Up	0.896821
GO_MF_DR_RNA_POLYMERASE_II_TRANSCRIPTION_COFACTOR_ACTIVITY	15	Down	0.897818
GO_CC_DR_BASOLATERAL_PLASMA_MEMBRANE	7	Up	0.899087
GO_MF_DR_INORGANIC_ANION_EXCHANGER_ACTIVITY	6	Up	0.901488
GO_MF_DR_ANION_TRANSMEMBRANE_TRANSPORTER_ACTIVITY	6	Up	0.901488
GO_BP_DR_BRAIN_MORPHOGENESIS	6	Down	0.905872
GO_MF_DR_NADP_BINDING2	11	Up	0.906464
GO_BP_DR_REGULATION_CATALYTIC_ACTIVITY	97	Down	0.914035
GO_MF_DR_TRANSFERASE_ACTIVITY_TRANSFERRING_ACYL_GROUPS	38	Up	0.917797
GO_BP_DR_NUCLEOTIDE-EXCISION_REPAIR	15	Up	0.918074
GO_CC_DR_MITOCHONDRIAL_ENVELOPE	6	Down	0.918749
GO_MF_DR_MONOOXYGENASE_ACTIVITY	26	Up	0.9202
GO_BP_DR_REDOX_HOMEOSTASIS	42	Down	0.920992
GO_BP_DR_OTOLITH_DEVELOPMENT	6	Up	0.922507
GO_BP_DR_GLYCOGEN_BIOSYNTHETIC_PROCESS	6	Down	0.924592
GO_BP_DR_NUCLEOCYTOPLASMIC_TRANSPORT	63	Up	0.926056
GO_BP_DR_MITOSIS	35	Up	0.926332
GO_MF_DR_IRON_ION_BINDING	43	Down	0.927709
GO_MF_DR_GLUTATHIONE_TRANSFERASE_ACTIVITY	6	Down	0.927859
GO_CC_DR_GOLGI_MEMBRANE	33	Up	0.92986
GO_BP_DR_HEART_CONTRACTION	12	Up	0.930267
GO_CC_DR_PROJECTION	25	Down	0.932008
GO_BP_DR_PROTEIN_ADP-RIBOSYLATION	6	Down	0.932716
GO_BP_DR_DNA-DEPENDENT_DNA_REPLICATION_INITIATION	6	Down	0.934442
GO_BP_DR_REGULATION_TRANSLATION	13	Up	0.934693
GO_BP_DR_OXIDATION-REDUCTION_PROCESS	337	Up	0.934917
GO_MF_DR_HYDROLASE_ACTIVITY_ACTING_ON_CARBON-NITROGEN_BUT_NOT_PEPTIDE_BONDS	8	Down	0.935597
GO_CC_DR_ENDOSOME	22	Down	0.939038
GO_BP_DR_RNA_METHYLATION	10	Up	0.940414
GO_CC_DR_JUNCTION	33	Up	0.941492
GO_BP_DR_RRNA_METHYLATION	7	Up	0.942991
GO_MF_DR_MICROTUBULE_MOTOR_ACTIVITY	39	Up	0.943644
GO_MF_DR_CARBOXYLESTERASE_ACTIVITY	6	Down	0.9468
GO_CC_DR_LATE_ENDOSOME_MEMBRANE	7	Down	0.950873
GO_BP_DR_CALCIUM_ION_TRANSMEMBRANE_TRANSPORT	21	Up	0.952057
GO_BP_DR_PROTEIN_KINASE_C-ACTIVATING_G-PROTEIN_COUPLED_RECEPTOR_SIGNALING_PATHWAY	9	Up	0.95243
GO_MF_DR_DIACYLGLYCEROL_KINASE_ACTIVITY	9	Up	0.95243
GO_BP_DR_TRANSMEMBRANE_RECEPTOR_PROTEIN_SERINE_THREONINE_KINASE_SIGNALING_PATHWAY	6	Down	0.95263
GO_BP_DR_SURFACE_RECEPTOR_SIGNALING_PATHWAY	23	Up	0.954428
GO_BP_DR_LIPID_CATABOLIC_PROCESS	9	Up	0.955657
GO_BP_DR_INNER_EAR_DEVELOPMENT	7	Down	0.957107
GO_CC_DR_PERINUCLEAR_REGION_CYTOPLASM	17	Up	0.960923
GO_BP_DR_NEURON_MIGRATION	11	Down	0.961394
GO_BP_DR_PHOSPHOLIPID_BIOSYNTHETIC_PROCESS	10	Up	0.962151
GO_BP_DR_MESODERMAL_MIGRATION	7	Down	0.971765
GO_BP_DR_RESPONSE_TO_HYPOXIA	13	Up	0.974521
GO_BP_DR_TRANSMEMBRANE_RECEPTOR_PROTEIN_TYROSINE_KINASE_SIGNALING_PATHWAY	22	Up	0.978186
GO_MF_DR_UBIQUITIN_BINDING	7	Up	0.979699
GO_BP_DR_FIN_REGENERATION	18	Up	0.981618
GO_MF_DR_ENDONUCLEASE_ACTIVITY	20	Up	0.985006
GO_BP_DR_PROTEIN_K63-LINKED_DEUBIQUITINATION	7	Down	0.987895
GO_MF_DR_RRNA_METHYLTRANSFERASE_ACTIVITY	6	Down	0.989212
GO_MF_DR_SULFOTRANSFERASE_ACTIVITY	14	Up	0.990217
GO_MF_DR_TRANSMEMBRANE_RECEPTOR_PROTEIN_SERINE_THREONINE_KINASE_ACTIVITY	8	Down	0.990375
GO_MF_DR_TRANSFORMING_GROWTH_FACTOR_BETA-ACTIVATED_RECEPTOR_ACTIVITY	7	Up	0.99134
GO_BP_DR_PHOSPHATIDYLINOSITOL-MEDIATED_SIGNALING	7	Down	0.991434
GO_MF_DR_PROTEIN_DISULFIDE_OXIDOREDUCTASE_ACTIVITY	13	Down	0.993171
GO_MF_DR_GLYCEROPHOSPHODIESTER_PHOSPHODIESTERASE_ACTIVITY	6	Up	0.995638
GO_BP_DR_EMBRYONIC_CRANIAL_SKELETON_MORPHOGENESIS	12	Down	0.998406
GO_BP_DR_FILOPODIUM_ASSEMBLY	14	Down	0.999235

## Sheet: S2_6
Term	NGenes	Direction	PValue
GO_BP_DR_METABOLIC_PROCESS	775	Up	1.55539e-06
GO_MF_DR_CATALYTIC_ACTIVITY	420	Up	1.96458e-05
GO_BP_DR_DNA-DEPENDENT	454	Down	0.000121888
GO_MF_DR_RECEPTOR_ACTIVITY	267	Down	0.000121908
GO_CC_DR_RESPIRATORY_CHAIN	10	Up	0.000122916
GO_MF_DR_DNA_BINDING	595	Down	0.000151201
GO_MF_DR_PHOSPHOLIPID_BINDING	187	Down	0.000244202
GO_MF_DR_SERINE-TYPE_ENDOPEPTIDASE_INHIBITOR_ACTIVITY	16	Down	0.000264628
GO_MF_DR_ION_CHANNEL_ACTIVITY	57	Down	0.000328084
GO_CC_DR_MEMBRANE_COAT	15	Up	0.000395292
GO_CC_DR_CYTOPLASM	675	Up	0.000400844
GO_CC_DR_MITOCHONDRIAL_INNER_MEMBRANE	48	Up	0.000452144
GO_BP_DR_ELECTRON_TRANSPORT_CHAIN	16	Up	0.000471872
GO_BP_DR_AXON_EXTENSION	6	Down	0.000694725
GO_BP_DR_PROTEIN_TRANSPORT	193	Up	0.000701652
GO_BP_DR_INTRACELLULAR_PROTEIN_TRANSPORT	181	Up	0.00107271
GO_BP_DR_TRANSLATION	146	Up	0.00118635
GO_MF_DR_OXIDOREDUCTASE_ACTIVITY	252	Up	0.00132282
GO_CC_DR_MITOCHONDRION	125	Up	0.00143368
GO_MF_DR_OXIDOREDUCTASE_ACTIVITY_ACTING_ON_THE_CH-OH_GROUP_DONORS_NAD_OR_NADP_AS_ACCEPTOR	34	Up	0.00197429
GO_BP_DR_ATP_SYNTHESIS_COUPLED_ELECTRON_TRANSPORT	6	Up	0.00202169
GO_BP_DR_RESPONSE_TO_STRESS	28	Up	0.00217678
GO_BP_DR_TRICARBOXYLIC_ACID_CYCLE	15	Up	0.00283891
GO_BP_DR_OXIDATION-REDUCTION_PROCESS	337	Up	0.00291944
GO_MF_DR_PROTEIN_TYROSINE_KINASE_ACTIVITY	337	Down	0.00367174
GO_BP_DR_PROTON_TRANSPORT	43	Up	0.00408965
GO_BP_DR_PROTEIN_PHOSPHORYLATION	370	Down	0.00469035
GO_BP_DR_RESPONSE_TO_LIGHT_STIMULUS	8	Up	0.00504335
GO_MF_DR_PROTEIN_KINASE_ACTIVITY	360	Down	0.0057963
GO_MF_DR_KINASE_ACTIVITY	305	Down	0.00585568
GO_MF_DR_ELECTRON_CARRIER_ACTIVITY	53	Up	0.0061523
GO_MF_DR_TRANSMEMBRANE_SIGNALING_RECEPTOR_ACTIVITY	24	Down	0.00656658
GO_BP_DR_ADHESION	57	Down	0.00726755
GO_BP_DR_EMBRYONIC_CRANIAL_SKELETON_MORPHOGENESIS	12	Down	0.00731949
GO_MF_DR_TRANSFERASE_ACTIVITY_TRANSFERRING_PHOSPHORUS-CONTAINING_GROUPS	390	Down	0.00744499
GO_BP_DR_CYTOKINE-MEDIATED_SIGNALING_PATHWAY	6	Down	0.00812243
GO_BP_DR_SIGNAL_TRANSDUCTION	382	Down	0.00877045
GO_MF_DR_HEME_BINDING	34	Up	0.00995793
GO_MF_DR_PROTEIN_SERINE_THREONINE_KINASE_ACTIVITY	223	Down	0.0102461
GO_CC_DR_CYTOSOL	49	Up	0.0105965
GO_BP_DR_RECEPTOR-MEDIATED_ENDOCYTOSIS	7	Down	0.011245
GO_BP_DR_LIPOPOLYSACCHARIDE_BIOSYNTHETIC_PROCESS	37	Down	0.0112522
GO_MF_DR_SCAVENGER_RECEPTOR_ACTIVITY	6	Down	0.0117169
GO_MF_DR_CALCIUM_CHANNEL_ACTIVITY	11	Down	0.0120241
GO_BP_DR_STEROID_BIOSYNTHETIC_PROCESS	9	Up	0.0121478
GO_MF_DR_TRANSFERASE_ACTIVITY_TRANSFERRING_ACYL_GROUPS	38	Up	0.0126135
GO_MF_DR_3-BETA-HYDROXY-DELTA5-STEROID_DEHYDROGENASE_ACTIVITY	6	Up	0.0127634
GO_CC_DR_CHROMOSOME_CENTROMERIC_REGION	17	Up	0.0130076
GO_CC_DR_MITOCHONDRIAL_MATRIX	9	Up	0.0135202
GO_BP_DR_RESPONSE_TO_CHEMICAL_STIMULUS	23	Up	0.0135581
GO_MF_DR_ACID-AMINO_ACID_LIGASE_ACTIVITY	64	Up	0.014764
GO_BP_DR_CALCIUM_ION_TRANSMEMBRANE_TRANSPORT	21	Down	0.0156046
GO_BP_DR_VESICLE-MEDIATED_TRANSPORT	94	Up	0.01679
GO_BP_DR_FIN_DEVELOPMENT	8	Down	0.0168961
GO_MF_DR_TRANSLATION_ELONGATION_FACTOR_ACTIVITY	14	Up	0.0181523
GO_BP_DR_TRANSPORT	356	Up	0.0194371
GO_MF_DR_SEQUENCE-SPECIFIC_DNA_BINDING	203	Down	0.0198767
GO_MF_DR_STRUCTURAL_CONSTITUENT_RIBOSOME	111	Up	0.0199765
GO_MF_DR_SEQUENCE-SPECIFIC_DNA_BINDING_TRANSCRIPTION_FACTOR_ACTIVITY	255	Down	0.0204403
GO_MF_DR_AMINOACYL-TRNA_EDITING_ACTIVITY	7	Up	0.0205604
GO_MF_DR_NADH_DEHYDROGENASE_UBIQUINONE_ACTIVITY	19	Up	0.0209998
GO_CC_DR_INTEGRIN_COMPLEX	13	Down	0.0217561
GO_BP_DR_PHOSPHORYLATION	316	Down	0.0219962
GO_CC_DR_RIBOSOME	134	Up	0.021998
GO_BP_DR_FROM_RNA_POLYMERASE_II_PROMOTER	46	Down	0.0220244
GO_BP_DR_RESPIRATORY_ELECTRON_TRANSPORT_CHAIN	6	Up	0.0237973
GO_BP_DR_TRANSLATIONAL_ELONGATION	17	Up	0.0242797
GO_BP_DR_RRNA_PROCESSING	22	Up	0.0243733
GO_BP_DR_EYE_DEVELOPMENT	8	Up	0.0247965
GO_MF_DR_PHOSPHATIDYLINOSITOL_PHOSPHOLIPASE_C_ACTIVITY	10	Down	0.0249977
GO_MF_DR_PROTEIN_HETERODIMERIZATION_ACTIVITY	12	Up	0.0253603
GO_BP_DR_TRANSCRIPTION_DNA-DEPENDENT	218	Down	0.0253795
GO_MF_DR_GUANYL-NUCLEOTIDE_EXCHANGE_FACTOR_ACTIVITY	42	Down	0.0258313
GO_BP_DR_INTRACELLULAR_SIGNAL_TRANSDUCTION	129	Down	0.0261192
GO_MF_DR_P-P-BOND-HYDROLYSIS-DRIVEN_PROTEIN_TRANSMEMBRANE_TRANSPORTER_ACTIVITY	6	Up	0.0265011
GO_BP_DR_ATP_HYDROLYSIS_COUPLED_PROTON_TRANSPORT	19	Up	0.0266779
GO_BP_DR_COMMUNICATION	52	Down	0.0268545
GO_BP_DR_REGULATION_SMALL_GTPASE_MEDIATED_SIGNAL_TRANSDUCTION	31	Down	0.0271491
GO_MF_DR_LIGASE_ACTIVITY	93	Up	0.0281519
GO_BP_DR_PEPTIDYL-PROLINE_MODIFICATION	8	Down	0.0286396
GO_MF_DR_FK506_BINDING	8	Down	0.0286396
GO_MF_DR_PROTEIN_TRANSPORTER_ACTIVITY	36	Up	0.0297234
GO_BP_DR_NEGATIVE_REGULATION_ENDOPEPTIDASE_ACTIVITY	27	Down	0.0300779
GO_CC_DR_EXTRACELLULAR_SPACE	24	Up	0.0300813
GO_MF_DR_MOTOR_ACTIVITY	33	Down	0.0303062
GO_CC_DR_CYTOSKELETON	109	Down	0.0304175
GO_BP_DR_DIVISION	59	Up	0.0307955
GO_MF_DR_DNA-DEPENDENT_ATPASE_ACTIVITY	8	Down	0.0308527
GO_CC_DR_MYOSIN_COMPLEX	32	Down	0.0316972
GO_BP_DR_RESPONSE_TO_OXIDATIVE_STRESS	6	Down	0.0348785
GO_BP_DR_GASTRULATION_WITH_MOUTH_FORMING_SECOND	9	Up	0.0349367
GO_MF_DR_BINDING	266	Up	0.0355766
GO_BP_DR_CELLULAR_PROTEIN_MODIFICATION_PROCESS	55	Up	0.0356273
GO_MF_DR_PYRIDOXAL_PHOSPHATE_BINDING	32	Up	0.0358057
GO_MF_DR_MANGANESE_ION_BINDING	9	Up	0.0369043
GO_BP_DR_GLYCOLYSIS	13	Up	0.0372947
GO_BP_DR_RIBOSOME_BIOGENESIS	29	Up	0.0380159
GO_BP_DR_CALCIUM_ION_TRANSPORT	19	Down	0.0394643
GO_BP_DR_INTEGRIN-MEDIATED_SIGNALING_PATHWAY	19	Down	0.0400689
GO_MF_DR_HYDROLASE_ACTIVITY	438	Up	0.0409488
GO_CC_DR_OUTER_MEMBRANE-BOUNDED_PERIPLASMIC_SPACE	9	Down	0.042498
GO_MF_DR_IONOTROPIC_GLUTAMATE_RECEPTOR_ACTIVITY	9	Down	0.042498
GO_MF_DR_EXTRACELLULAR-GLUTAMATE-GATED_ION_CHANNEL_ACTIVITY	9	Down	0.042498
GO_MF_DR_COENZYME_BINDING	30	Up	0.0432965
GO_MF_DR_OXIDOREDUCTASE_PAIRED_DONORS_MOLECULAR_OXYGEN_2-OXOGLUTARATE_ONE_ATOM_EACH_OXYGEN_BOTH_DONORS	18	Down	0.0448254
GO_BP_DR_MORPHOGENESIS	20	Up	0.0453098
GO_BP_DR_REGULATION_CYCLE	30	Up	0.0455651
GO_CC_DR_LYSOSOME	17	Up	0.0495128
GO_CC_DR_INTEGRAL_TO_GOLGI_MEMBRANE	14	Down	0.0503533
GO_CC_DR_PROTEASOME_COMPLEX	33	Up	0.0508974
GO_MF_DR_CYTOCHROME-C_OXIDASE_ACTIVITY	13	Up	0.0509055
GO_MF_DR_CATION_BINDING	26	Up	0.0539679
GO_MF_DR_PHOSPHATASE_ACTIVITY	78	Down	0.0546275
GO_MF_DR_NAD_BINDING2	28	Up	0.0559357
GO_MF_DR_FMN_BINDING	8	Up	0.0568253
GO_BP_DR_REGULATION_CATALYTIC_ACTIVITY	97	Down	0.0581185
GO_CC_DR_INTEGRAL_TO_PLASMA_MEMBRANE	23	Down	0.0596712
GO_BP_DR_MULTICELLULAR_ORGANISMAL_DEVELOPMENT	167	Down	0.0597048
GO_CC_DR_MICROTUBULE_BASAL_BODY	7	Up	0.0599056
GO_MF_DR_INTRAMOLECULAR_TRANSFERASE_ACTIVITY_PHOSPHOTRANSFERASES	6	Up	0.0602637
GO_MF_DR_PHOSPHOTRANSFERASE_ACTIVITY_ALCOHOL_GROUP_AS_ACCEPTOR	74	Down	0.0610699
GO_MF_DR_PHOSPHORIC_DIESTER_HYDROLASE_ACTIVITY	28	Down	0.0624615
GO_MF_DR_PHOSPHOLIPASE_C_ACTIVITY	11	Down	0.0635246
GO_BP_DR_FERROUS_IRON_TRANSPORT	17	Up	0.0636121
GO_MF_DR_FERROUS_IRON_TRANSMEMBRANE_TRANSPORTER_ACTIVITY	17	Up	0.0636121
GO_BP_DR_UMP_BIOSYNTHETIC_PROCESS	7	Up	0.0641124
GO_CC_DR_RIBONUCLEOPROTEIN_COMPLEX	100	Up	0.0655739
GO_BP_DR_HEART_CONTRACTION	12	Down	0.065638
GO_CC_DR_MEDIATOR_COMPLEX	16	Down	0.0686486
GO_CC_DR_LATE_ENDOSOME_MEMBRANE	7	Up	0.0700034
GO_CC_DR_PROTEIN_COMPLEX	15	Down	0.0700087
GO_BP_DR_DNA_METABOLIC_PROCESS	10	Down	0.0702282
GO_MF_DR_LIPID_BINDING	16	Up	0.0706551
GO_CC_DR_LARGE_RIBOSOMAL_SUBUNIT	8	Up	0.0716028
GO_CC_DR_CHROMATIN	7	Down	0.072022
GO_BP_DR_ANTERIOR_POSTERIOR_PATTERN_SPECIFICATION	13	Down	0.0722145
GO_CC_DR_PEROXISOME	11	Up	0.0724195
GO_BP_DR_EMBRYONIC_HEMOPOIESIS	8	Up	0.0726562
GO_MF_DR_CALCIUM_ION_BINDING	220	Down	0.0727478
GO_MF_DR_CARBOHYDRATE_BINDING	62	Down	0.0730571
GO_MF_DR_IRON_ION_BINDING	43	Up	0.0739423
GO_BP_DR_LIVER_DEVELOPMENT	23	Down	0.0753354
GO_BP_DR_IONOTROPIC_GLUTAMATE_RECEPTOR_SIGNALING_PATHWAY	8	Down	0.075822
GO_BP_DR_PHOTOPERIODISM	7	Up	0.0762399
GO_BP_DR_TRNA_AMINOACYLATION_FOR_PROTEIN_TRANSLATION	29	Up	0.0776482
GO_BP_DR_ION_TRANSPORT	91	Down	0.0787045
GO_MF_DR_POTASSIUM_CHANNEL_ACTIVITY	6	Down	0.0802863
GO_BP_DR_NEUROPEPTIDE_SIGNALING_PATHWAY	9	Down	0.0810496
GO_CC_DR_SYNAPSE	14	Down	0.0828356
GO_MF_DR_NAD_BINDING	9	Up	0.0829283
GO_MF_DR_RECEPTOR_SIGNALING_PROTEIN_ACTIVITY	9	Down	0.0830845
GO_BP_DR_CELLULAR_COMPONENT_ORGANIZATION	10	Down	0.0845629
GO_MF_DR_TRANSMEMBRANE_RECEPTOR_PROTEIN_TYROSINE_KINASE_ACTIVITY	15	Down	0.0846238
GO_MF_DR_VOLTAGE-GATED_ION_CHANNEL_ACTIVITY	8	Down	0.0864478
GO_CC_DR_PROJECTION	25	Up	0.0873073
GO_BP_DR_POSITIVE_FROM_RNA_POLYMERASE_II_PROMOTER	19	Down	0.0921005
GO_BP_DR_CYCLE	76	Up	0.0936484
GO_MF_DR_STEROID_BINDING	6	Down	0.0937918
GO_MF_DR_ENDONUCLEASE_ACTIVITY	20	Up	0.0951241
GO_CC_DR_ENDOPLASMIC_RETICULUM_MEMBRANE	53	Up	0.0974056
GO_BP_DR_AXON_GUIDANCE	13	Down	0.0975448
GO_CC_DR_INTRINSIC_TO_ENDOPLASMIC_RETICULUM_MEMBRANE	9	Up	0.0980962
GO_MF_DR_AMINOACYL-TRNA_LIGASE_ACTIVITY	33	Up	0.0983201
GO_BP_DR_DORSAL_VENTRAL_PATTERN_FORMATION	34	Down	0.0999546
GO_BP_DR_PROTEIN_POLYMERIZATION	13	Down	0.104134
GO_BP_DR_METHYLATION	85	Up	0.104676
GO_MF_DR_HYDROGEN_ION_TRANSMEMBRANE_TRANSPORTER_ACTIVITY	17	Up	0.108212
GO_MF_DR_CARBOXYPEPTIDASE_ACTIVITY	8	Up	0.109133
GO_MF_DR_PEROXIREDOXIN_ACTIVITY	6	Up	0.111341
GO_MF_DR_RRNA_METHYLTRANSFERASE_ACTIVITY	6	Up	0.112012
GO_MF_DR_OXIDOREDUCTASE_ACTIVITY_ACTING_ON_NADH_OR_NADPH	9	Up	0.11269
GO_BP_DR_PROTEIN_IMPORT_NUCLEUS	9	Up	0.113237
GO_BP_DR_RESPONSE_TO_COPPER_ION	6	Up	0.114314
GO_MF_DR_ANTIOXIDANT_ACTIVITY	11	Up	0.114803
GO_BP_DR_PROTEIN_KINASE_C-ACTIVATING_G-PROTEIN_COUPLED_RECEPTOR_SIGNALING_PATHWAY	9	Down	0.115417
GO_MF_DR_DIACYLGLYCEROL_KINASE_ACTIVITY	9	Down	0.115417
GO_MF_DR_RNA_POLYMERASE_II_TRANSCRIPTION_COFACTOR_ACTIVITY	15	Down	0.115465
GO_MF_DR_TRANSAMINASE_ACTIVITY	10	Up	0.115593
GO_BP_DR_CELL-SIGNALING	6	Down	0.11581
GO_CC_DR_UBIQUITIN_LIGASE_COMPLEX	16	Down	0.115891
GO_BP_DR_GTP_CATABOLIC_PROCESS	140	Up	0.119749
GO_CC_DR_NUCLEOLUS	44	Up	0.125003
GO_MF_DR_DAMAGED_DNA_BINDING	22	Down	0.125726
GO_MF_DR_TRANSFERASE_ACTIVITY_TRANSFERRING_GLYCOSYL_GROUPS	74	Down	0.127708
GO_MF_DR_PROTEIN_HOMODIMERIZATION_ACTIVITY	20	Up	0.127834
GO_MF_DR_TRANSCRIPTION_REGULATORY_REGION_SEQUENCE-SPECIFIC_DNA_BINDING	6	Down	0.128576
GO_BP_DR_SURFACE_RECEPTOR_SIGNALING_PATHWAY	23	Down	0.129652
GO_MF_DR_HYDROLASE_ACTIVITY_ACTING_ON_ACID_ANHYDRIDES	14	Down	0.130222
GO_CC_DR_PLASMA_MEMBRANE	119	Down	0.131544
GO_CC_DR_CHROMOSOME	60	Down	0.131726
GO_BP_DR_TRANSFORMING_GROWTH_FACTOR_BETA_RECEPTOR_SIGNALING_PATHWAY	14	Down	0.132462
GO_BP_DR_MIDBRAIN_DEVELOPMENT	8	Up	0.134731
GO_MF_DR_UNFOLDED_PROTEIN_BINDING	56	Up	0.13675
GO_MF_DR_UBIQUITIN_BINDING	7	Down	0.138071
GO_MF_DR_L-ASCORBIC_ACID_BINDING	7	Down	0.13996
GO_MF_DR_ATPASE_ACTIVITY_COUPLED_TO_TRANSMEMBRANE_MOVEMENT_SUBSTANCES	23	Down	0.141951
GO_BP_DR_CARBOHYDRATE_TRANSPORT	11	Up	0.145411
GO_BP_DR_HEART_DEVELOPMENT	53	Up	0.146273
GO_MF_DR_HYDROLASE_ACTIVITY_HYDROLYZING_O-GLYCOSYL_COMPOUNDS	28	Up	0.147008
GO_BP_DR_SPROUTING_ANGIOGENESIS	16	Down	0.14702
GO_BP_DR_BIOSYNTHETIC_PROCESS	46	Up	0.147747
GO_BP_DR_NEURAL_TUBE_FORMATION	6	Up	0.148107
GO_BP_DR_PHOTOSYNTHESIS	6	Down	0.148132
GO_BP_DR_CHLOROPHYLL_BIOSYNTHETIC_PROCESS	6	Down	0.148132
GO_MF_DR_MAGNESIUM_CHELATASE_ACTIVITY	6	Down	0.148132
GO_CC_DR_COLLAGEN	12	Down	0.148578
GO_MF_DR_SUGARHYDROGEN_SYMPORTER_ACTIVITY	6	Up	0.149156
GO_MF_DR_RHO_GTPASE_BINDING	6	Down	0.149837
GO_BP_DR_POTASSIUM_ION_TRANSMEMBRANE_TRANSPORT	13	Down	0.149927
GO_MF_DR_ATPASE_ACTIVITY	64	Up	0.150026
GO_BP_DR_CILIUM_ASSEMBLY	20	Up	0.152264
GO_BP_DR_AUTOPHAGIC_VACUOLE_ASSEMBLY	7	Up	0.153427
GO_CC_DR_NUCLEAR_ENVELOPE	8	Down	0.154231
GO_CC_DR_PROTON-TRANSPORTING_TWO-SECTOR_ATPASE_COMPLEX_PROTON-TRANSPORTING_DOMAIN	8	Up	0.156003
GO_CC_DR_CLATHRIN_ADAPTOR_COMPLEX	19	Up	0.157495
GO_BP_DR_RRNA_METHYLATION	7	Up	0.160321
GO_BP_DR_EYE_PHOTORECEPTOR_DEVELOPMENT	9	Up	0.16589
GO_MF_DR_PHOSPHATIDYLINOSITOL_BINDING	40	Down	0.166316
GO_MF_DR_4_IRON_4_SULFUR_CLUSTER_BINDING	13	Up	0.16916
GO_CC_DR_GOLGI_MEMBRANE	33	Up	0.170149
GO_MF_DR_SIALYLTRANSFERASE_ACTIVITY	10	Down	0.171807
GO_MF_DR_CALCIUM-DEPENDENT_PHOSPHOLIPID_BINDING	7	Up	0.173584
GO_BP_DR_INTRACELLULAR_TRANSPORT	11	Down	0.173669
GO_MF_DR_PROTEIN_DOMAIN_SPECIFIC_BINDING	19	Down	0.175221
GO_MF_DR_OXIDOREDUCTASE_PAIRED_DONORS_MOLECULAR_OXYGEN	25	Up	0.175721
GO_MF_DR_BETA-CATENIN_BINDING	8	Down	0.176132
GO_BP_DR_CAMERA-TYPE_EYE_DEVELOPMENT	12	Down	0.176267
GO_MF_DR_ASPARTIC-TYPE_ENDOPEPTIDASE_ACTIVITY	8	Up	0.176286
GO_CC_DR_NUCLEOSOME	24	Down	0.179157
GO_CC_DR_MITOCHONDRIAL_MEMBRANE	10	Up	0.180386
GO_MF_DR_TRANSCRIPTION_REGULATORY_REGION_DNA_BINDING	10	Down	0.181346
GO_BP_DR_PROTEIN_FOLDING	84	Up	0.184135
GO_BP_DR_INNER_EAR_DEVELOPMENT	7	Down	0.186708
GO_BP_DR_ER_TO_GOLGI_VESICLE-MEDIATED_TRANSPORT	7	Up	0.188185
GO_BP_DR_GLUTATHIONE_BIOSYNTHETIC_PROCESS	7	Up	0.188767
GO_BP_DR_PROJECTION_ORGANIZATION	10	Up	0.193338
GO_BP_DR_VACUOLAR_TRANSPORT	8	Down	0.193974
GO_BP_DR_STEROID_HORMONE_MEDIATED_SIGNALING_PATHWAY	27	Down	0.19486
GO_MF_DR_STEROID_HORMONE_RECEPTOR_ACTIVITY	27	Down	0.19486
GO_BP_DR_TRANSLATIONAL_INITIATION	48	Up	0.195328
GO_MF_DR_CALMODULIN_BINDING	11	Down	0.195771
GO_CC_DR_PROTON-TRANSPORTING_V-TYPE_ATPASE_V1_DOMAIN	7	Up	0.196218
GO_MF_DR_METHYLTRANSFERASE_ACTIVITY	97	Up	0.196975
GO_BP_DR_NUCLEOCYTOPLASMIC_TRANSPORT	63	Up	0.199204
GO_MF_DR_RRNA_BINDING	9	Up	0.200185
GO_BP_DR_VESICLE_DOCKING_EXOCYTOSIS	8	Up	0.205223
GO_BP_DR_CATION_TRANSPORT	52	Down	0.205495
GO_BP_DR_TRANSMEMBRANE_RECEPTOR_PROTEIN_TYROSINE_KINASE_SIGNALING_PATHWAY	22	Down	0.205686
GO_BP_DR_FILOPODIUM_ASSEMBLY	14	Down	0.20653
GO_BP_DR_SKELETAL_MUSCLE_FIBER_DEVELOPMENT	7	Down	0.207226
GO_MF_DR_IRON-SULFUR_CLUSTER_BINDING	29	Up	0.211239
GO_CC_DR_DYNEIN_COMPLEX	8	Down	0.211632
GO_CC_DR_ENDOSOME	22	Up	0.212541
GO_BP_DR_ANGIOGENESIS	32	Down	0.214648
GO_BP_DR_NEGATIVE_DNA-DEPENDENT	27	Down	0.217003
GO_BP_DR_CARTILAGE_DEVELOPMENT	34	Down	0.218223
GO_MF_DR_TRANSPORTER_ACTIVITY	44	Down	0.221065
GO_MF_DR_TUBULIN-TYROSINE_LIGASE_ACTIVITY	6	Up	0.222898
GO_MF_DR_SH3_DOMAIN_BINDING	14	Down	0.224816
GO_MF_DR_EXTRACELLULAR_MATRIX_STRUCTURAL_CONSTITUENT	6	Down	0.225261
GO_BP_DR_CHROMOSOME_CONDENSATION	7	Down	0.228285
GO_BP_DR_AXON_EXTENSION_DEVELOPMENT	7	Down	0.22951
GO_MF_DR_PROTEIN_METHYLTRANSFERASE_ACTIVITY	13	Up	0.235068
GO_MF_DR_OXIDOREDUCTASE_PAIRED_DONORS_MOLECULAR_OXYGEN_REDUCED_FLAVIN_OR_FLAVOPROTEIN_ONE_ATOM_OXYGEN	7	Up	0.236103
GO_BP_DR_REGULATION_ARF_PROTEIN_SIGNAL_TRANSDUCTION	11	Up	0.236673
GO_MF_DR_ARF_GUANYL-NUCLEOTIDE_EXCHANGE_FACTOR_ACTIVITY	11	Up	0.236673
GO_MF_DR_TRANSLATION_INITIATION_FACTOR_ACTIVITY	47	Up	0.237425
GO_MF_DR_TRANSITION_METAL_ION_BINDING	10	Down	0.239366
GO_BP_DR_PROTEIN_GLYCOSYLATION	29	Down	0.240358
GO_MF_DR_GTP_BINDING	237	Up	0.240448
GO_MF_DR_NUCLEOSIDE-TRIPHOSPHATASE_ACTIVITY	101	Up	0.241158
GO_BP_DR_METAL_ION_TRANSPORT	9	Up	0.241178
GO_BP_DR_AXONOGENESIS	12	Up	0.241606
GO_CC_DR_SPLICEOSOMAL_COMPLEX	16	Up	0.241682
GO_BP_DR_ATP_METABOLIC_PROCESS	8	Up	0.241754
GO_BP_DR_NOTCH_SIGNALING_PATHWAY	25	Down	0.243719
GO_BP_DR_REDOX_HOMEOSTASIS	42	Up	0.246526
GO_BP_DR_FATTY_ACID_BIOSYNTHETIC_PROCESS	9	Up	0.250363
GO_MF_DR_SMALL_GTPASE_REGULATOR_ACTIVITY	15	Down	0.251286
GO_BP_DR_SIGNAL_TRANSDUCTION_BY_PHOSPHORYLATION	19	Down	0.253587
GO_MF_DR_IDENTICAL_PROTEIN_BINDING	13	Down	0.256953
GO_BP_DR_CARBOHYDRATE_PHOSPHORYLATION	6	Down	0.259833
GO_BP_DR_CONVERGENT_EXTENSION	13	Down	0.260044
GO_BP_DR_PROTEIN_PEPTIDYL-PROLYL_ISOMERIZATION	15	Up	0.260484
GO_MF_DR_PROTEIN_DISULFIDE_OXIDOREDUCTASE_ACTIVITY	13	Up	0.261569
GO_BP_DR_HOMOPHILIC_ADHESION	20	Down	0.263028
GO_BP_DR_HEMOPOIETIC_STEM_DIFFERENTIATION	6	Down	0.263534
GO_MF_DR_PSEUDOURIDINE_SYNTHASE_ACTIVITY	13	Down	0.264993
GO_MF_DR_GTPASE_ACTIVITY	169	Up	0.267135
GO_BP_DR_CARTILAGE_MORPHOGENESIS	7	Down	0.270667
GO_BP_DR_PROTEIN_DEACETYLATION	8	Up	0.271006
GO_BP_DR_DEPHOSPHORYLATION	105	Down	0.273145
GO_BP_DR_RESPONSE_TO_HYPOXIA	13	Down	0.273243
GO_BP_DR_CARBOHYDRATE_TRANSMEMBRANE_TRANSPORT	7	Up	0.276297
GO_BP_DR_NOTOCHORD_DEVELOPMENT2	11	Up	0.277132
GO_BP_DR_REGULATION_PROLIFERATION	6	Up	0.277436
GO_BP_DR_CILIUM_MORPHOGENESIS	12	Up	0.278237
GO_CC_DR_HETEROTRIMERIC_G-PROTEIN_COMPLEX	12	Down	0.278344
GO_BP_DR_RNA_METABOLIC_PROCESS	16	Up	0.28144
GO_MF_DR_SELENIUM_BINDING	9	Up	0.281854
GO_BP_DR_HEART_MORPHOGENESIS	13	Down	0.283701
GO_BP_DR_DETERMINATION_LEFT_RIGHT_SYMMETRY	35	Up	0.28446
GO_BP_DR_GLYCOGEN_BIOSYNTHETIC_PROCESS	6	Up	0.286942
GO_MF_DR_AMINOPEPTIDASE_ACTIVITY	13	Up	0.289028
GO_CC_DR_CYTOPLASMIC_MRNA_PROCESSING_BODY	6	Down	0.289562
GO_MF_DR_S-ADENOSYLMETHIONINE-DEPENDENT_METHYLTRANSFERASE_ACTIVITY	7	Up	0.291506
GO_BP_DR_REGULATION_TRANSLATION	13	Down	0.295348
GO_CC_DR_INTERMEDIATE_FILAMENT	11	Up	0.297968
GO_BP_DR_REGULATION_ION_TRANSMEMBRANE_TRANSPORT	22	Down	0.30021
GO_BP_DR_RETINA_MORPHOGENESIS_IN_CAMERA-TYPE_EYE	9	Up	0.300855
GO_BP_DR_PSEUDOURIDINE_SYNTHESIS	12	Down	0.301301
GO_MF_DR_RECEPTOR_BINDING	18	Down	0.302533
GO_MF_DR_MONOOXYGENASE_ACTIVITY	26	Up	0.304455
GO_BP_DR_TRANSCRIPTION_INITIATION_FROM_RNA_POLYMERASE_II_PROMOTER	9	Down	0.307077
GO_CC_DR_CORTEX	9	Down	0.308395
GO_BP_DR_REGULATION_APOPTOTIC_PROCESS	30	Down	0.312969
GO_BP_DR_TERMINATION_G-PROTEIN_COUPLED_RECEPTOR_SIGNALING_PATHWAY	20	Down	0.313043
GO_BP_DR_GONAD_DEVELOPMENT	9	Up	0.313458
GO_BP_DR_MUSCLE_ORGAN_DEVELOPMENT	10	Down	0.316658
GO_BP_DR_RNA_MODIFICATION	13	Down	0.32135
GO_BP_DR_PROTEIN_METHYLATION	15	Up	0.321668
GO_BP_DR_POTASSIUM_ION_TRANSPORT	9	Down	0.321908
GO_BP_DR_RETINAL_GANGLION_AXON_GUIDANCE	16	Down	0.322443
GO_BP_DR_EXTRACELLULAR_POLYSACCHARIDE_BIOSYNTHETIC_PROCESS	8	Up	0.322666
GO_MF_DR_DTDP-4-DEHYDRORHAMNOSE_REDUCTASE_ACTIVITY	8	Up	0.322666
GO_BP_DR_DNA_TOPOLOGICAL_CHANGE	11	Down	0.322673
GO_MF_DR_SULFURIC_ESTER_HYDROLASE_ACTIVITY	12	Down	0.328225
GO_MF_DR_FOUR-WAY_JUNCTION_HELICASE_ACTIVITY	15	Up	0.328698
GO_BP_DR_MELANOSOME_TRANSPORT	9	Up	0.3354
GO_CC_DR_SPINDLE	10	Down	0.336879
GO_BP_DR_NUCLEIC_ACID_PHOSPHODIESTER_BOND_HYDROLYSIS	50	Up	0.337339
GO_MF_DR_INSULIN_RECEPTOR_BINDING	6	Down	0.337445
GO_BP_DR_CELLULAR_AMINO_ACID_METABOLIC_PROCESS	19	Up	0.340419
GO_BP_DR_ACTIN_CYTOSKELETON_ORGANIZATION	22	Down	0.34544
GO_BP_DR_NEURON_MIGRATION	11	Down	0.345645
GO_BP_DR_PROTEIN_LOCALIZATION	6	Up	0.34585
GO_BP_DR_PURINE_NUCLEOTIDE_BIOSYNTHETIC_PROCESS	8	Up	0.348432
GO_BP_DR_MRNA_PROCESSING	59	Down	0.349435
GO_CC_DR_LAMELLIPODIUM	6	Up	0.350301
GO_BP_DR_DNA_REPLICATION	54	Down	0.353596
GO_BP_DR_REGULATION_PHOSPHORYLATION	8	Down	0.355226
GO_MF_DR_HYDROLASE_ACTIVITY_ACTING_ON_ACID_ANHYDRIDES_IN_PHOSPHORUS-CONTAINING_ANHYDRIDES	14	Down	0.355356
GO_BP_DR_MICROTUBULE_CYTOSKELETON_ORGANIZATION	10	Down	0.355738
GO_BP_DR_CELLULAR_METABOLIC_PROCESS	27	Up	0.355764
GO_CC_DR_LYSOSOMAL_MEMBRANE	9	Up	0.356916
GO_BP_DR_RETINA_DEVELOPMENT_IN_CAMERA-TYPE_EYE	40	Up	0.36056
GO_BP_DR_EXTRACELLULAR_MATRIX_ORGANIZATION	6	Up	0.363786
GO_MF_DR_CHAPERONE_BINDING	8	Up	0.368623
GO_MF_DR_HYDROLASE_ACTIVITY_ACTING_ON_CARBON-NITROGEN_BUT_NOT_PEPTIDE_BONDS_IN_LINEAR_AMIDES	9	Up	0.369704
GO_CC_DR_ENDOPLASMIC_RETICULUM	93	Up	0.373007
GO_MF_DR_STRUCTURAL_MOLECULE_ACTIVITY	55	Up	0.373143
GO_MF_DR_HEAT_SHOCK_PROTEIN_BINDING	43	Up	0.376235
GO_MF_DR_TRANSFERASE_ACTIVITY_TRANSFERRING_ACYL_GROUPS_OTHER_THAN_AMINO-ACYL_GROUPS	30	Up	0.377981
GO_CC_DR_POSTSYNAPTIC_MEMBRANE	13	Down	0.378209
GO_BP_DR_SRP-DEPENDENT_COTRANSLATIONAL_PROTEIN_TARGETING_TO_MEMBRANE	6	Up	0.378966
GO_MF_DR_GALACTOSYLTRANSFERASE_ACTIVITY	9	Down	0.379723
GO_BP_DR_MICROTUBULE-BASED_MOVEMENT	49	Down	0.38173
GO_MF_DR_GTPASE_BINDING	9	Down	0.383327
GO_MF_DR_PROTEIN_DIMERIZATION_ACTIVITY	94	Down	0.384096
GO_CC_DR_MICROTUBULE	49	Down	0.385168
GO_BP_DR_GROWTH2	9	Down	0.387793
GO_BP_DR_EXOCRINE_PANCREAS_DEVELOPMENT	12	Up	0.388351
GO_MF_DR_MICROTUBULE_BINDING	19	Down	0.388606
GO_BP_DR_EMBRYONIC_PATTERN_SPECIFICATION	8	Down	0.390196
GO_CC_DR_MICROTUBULE_ORGANIZING_CENTER	15	Up	0.391689
GO_MF_DR_COPPER_ION_BINDING	12	Up	0.395153
GO_BP_DR_MICROTUBULE-BASED_PROCESS	17	Down	0.397019
GO_BP_DR_NEUROGENESIS	7	Up	0.400661
GO_CC_DR_RETROMER_COMPLEX	7	Down	0.403575
GO_BP_DR_RETINOIC_ACID_RECEPTOR_SIGNALING_PATHWAY	7	Down	0.404813
GO_BP_DR_CANONICAL_WNT_RECEPTOR_SIGNALING_PATHWAY	21	Up	0.404946
GO_MF_DR_NADP_BINDING2	11	Up	0.41373
GO_BP_DR_DNA_RECOMBINATION	32	Up	0.415758
GO_BP_DR_DNA-DEPENDENT_DNA_REPLICATION_INITIATION	6	Down	0.417058
GO_BP_DR_CONVERGENT_EXTENSION_GASTRULATION	34	Down	0.417276
GO_BP_DR_EPIBOLY_GASTRULATION_WITH_MOUTH_FORMING_SECOND	16	Up	0.417991
GO_BP_DR_FATTY_ACID_METABOLIC_PROCESS	11	Up	0.420489
GO_BP_DR_NEGATIVE_REGULATION_CATALYTIC_ACTIVITY	6	Up	0.422744
GO_BP_DR_PEPTIDYL-LYSINE_METHYLATION	13	Down	0.423175
GO_CC_DR_NUCLEAR_SPECK	8	Down	0.423653
GO_BP_DR_COENZYME_A_BIOSYNTHETIC_PROCESS	6	Down	0.424034
GO_MF_DR_PROTEIN_TYROSINE_SERINE_THREONINE_PHOSPHATASE_ACTIVITY	28	Down	0.42503
GO_CC_DR_JUNCTION	33	Down	0.427427
GO_BP_DR_CARBOHYDRATE_BIOSYNTHETIC_PROCESS	6	Up	0.427768
GO_CC_DR_EXTRINSIC_TO_MEMBRANE	10	Down	0.427908
GO_MF_DR_SNAP_RECEPTOR_ACTIVITY	7	Down	0.427963
GO_BP_DR_EMBRYONIC_HEART_TUBE_DEVELOPMENT	12	Up	0.429647
GO_MF_DR_PROTEIN_KINASE_BINDING	21	Up	0.429967
GO_BP_DR_INTRACELLULAR_RECEPTOR_MEDIATED_SIGNALING_PATHWAY	13	Down	0.43009
GO_BP_DR_TRANSMEMBRANE_RECEPTOR_PROTEIN_SERINE_THREONINE_KINASE_SIGNALING_PATHWAY	6	Down	0.43139
GO_MF_DR_INOSITOL-145-TRISPHOSPHATE_3-KINASE_ACTIVITY	7	Up	0.432016
GO_BP_DR_NUCLEOTIDE-EXCISION_REPAIR	15	Down	0.432488
GO_BP_DR_SPINAL_CORD_MOTOR_NEURON_DIFFERENTIATION	6	Down	0.433063
GO_BP_DR_DIFFERENTIATION	37	Down	0.433582
GO_BP_DR_ATP_CATABOLIC_PROCESS	122	Up	0.43395
GO_MF_DR_3-HYDROXYACYL-COA_DEHYDROGENASE_ACTIVITY	6	Up	0.436686
GO_BP_DR_INTRAFLAGELLAR_TRANSPORT	6	Up	0.437463
GO_BP_DR_DNA-DEPENDENT_TRANSCRIPTION_INITIATION	13	Down	0.43776
GO_BP_DR_PHOSPHOLIPID_BIOSYNTHETIC_PROCESS	10	Up	0.438108
GO_MF_DR_HYDROLASE_ACTIVITY_ACTING_ON_ACID_ANHYDRIDES_CATALYZING_TRANSMEMBRANE_MOVEMENT_SUBSTANCES	30	Up	0.438928
GO_BP_DR_NUCLEOSOME_ASSEMBLY	29	Down	0.440054
GO_BP_DR_PROTEIN_K63-LINKED_DEUBIQUITINATION	7	Down	0.441352
GO_BP_DR_ATP_BIOSYNTHETIC_PROCESS	17	Up	0.442333
GO_MF_DR_NAD_ADP-RIBOSYLTRANSFERASE_ACTIVITY	12	Up	0.442337
GO_BP_DR_BASE-EXCISION_REPAIR	9	Down	0.444072
GO_BP_DR_RESPONSE_TO_IONIZING_RADIATION	6	Up	0.444746
GO_BP_DR_PROTEIN_ADP-RIBOSYLATION	6	Up	0.446513
GO_BP_DR_ATP_SYNTHESIS_COUPLED_PROTON_TRANSPORT	17	Up	0.447822
GO_BP_DR_BLOOD_VESSEL_DEVELOPMENT	13	Down	0.448168
GO_CC_DR_ENDOSOME_MEMBRANE	6	Up	0.448256
GO_BP_DR_MESODERMAL_MIGRATION	7	Up	0.449831
GO_BP_DR_FIN_REGENERATION	18	Down	0.451689
GO_BP_DR_BLOOD_VESSEL_MORPHOGENESIS	12	Down	0.451788
GO_MF_DR_LYASE_ACTIVITY	40	Up	0.456052
GO_MF_DR_PROTEIN_KINASE_C_ACTIVITY	9	Up	0.458019
GO_BP_DR_PECTORAL_FIN_DEVELOPMENT	8	Up	0.459272
GO_MF_DR_WNT-PROTEIN_BINDING	9	Up	0.459731
GO_MF_DR_HISTONE-LYSINE_N-METHYLTRANSFERASE_ACTIVITY	17	Down	0.461077
GO_BP_DR_TRNA_METHYLATION	7	Up	0.461591
GO_BP_DR_GPI_ANCHOR_BIOSYNTHETIC_PROCESS	11	Up	0.462344
GO_BP_DR_PEPTIDYL-TYROSINE_DEPHOSPHORYLATION	51	Down	0.462894
GO_CC_DR_PROTEINACEOUS_EXTRACELLULAR_MATRIX	11	Up	0.463116
GO_MF_DR_METAL_ION_BINDING	641	Down	0.464258
GO_BP_DR_HISTONE_LYSINE_METHYLATION	15	Down	0.46446
GO_MF_DR_PROTEIN_TYROSINE_PHOSPHATASE_ACTIVITY	57	Down	0.467671
GO_BP_DR_GERM_MIGRATION	6	Down	0.473325
GO_BP_DR_DETERMINATION_HEART_LEFT_RIGHT_ASYMMETRY	6	Down	0.473667
GO_MF_DR_WNT-ACTIVATED_RECEPTOR_ACTIVITY	8	Up	0.475768
GO_MF_DR_ISOMERASE_ACTIVITY	40	Up	0.483829
GO_BP_DR_POSITIVE_REGULATION_FIBROBLAST_GROWTH_FACTOR_RECEPTOR_SIGNALING_PATHWAY	6	Up	0.486068
GO_MF_DR_CYTOSKELETAL_ADAPTOR_ACTIVITY	12	Down	0.486427
GO_MF_DR_TRANSMEMBRANE_RECEPTOR_PROTEIN_SERINE_THREONINE_KINASE_ACTIVITY	8	Up	0.487977
GO_BP_DR_MAPK_CASCADE	12	Down	0.489511
GO_MF_DR_MAP_KINASE_ACTIVITY	12	Down	0.489511
GO_BP_DR_DOUBLE-STRAND_BREAK_REPAIR	6	Up	0.492719
GO_MF_DR_PHOSPHOPROTEIN_PHOSPHATASE_ACTIVITY	58	Down	0.496074
GO_MF_DR_PROTON-TRANSPORTING_ATPASE_ACTIVITY_ROTATIONAL_MECHANISM	10	Up	0.500575
GO_MF_DR_GTPASE_ACTIVATOR_ACTIVITY	32	Down	0.50137
GO_MF_DR_NON-MEMBRANE_SPANNING_PROTEIN_TYROSINE_KINASE_ACTIVITY	8	Down	0.501396
GO_BP_DR_TRANSMEMBRANE_TRANSPORT	222	Up	0.503268
GO_BP_DR_PROTEIN_COMPLEX_ASSEMBLY	8	Down	0.505416
GO_BP_DR_REGULATION_CYCLIN-DEPENDENT_PROTEIN_KINASE_ACTIVITY	15	Up	0.508156
GO_MF_DR_ANTIPORTER_ACTIVITY	6	Down	0.509236
GO_BP_DR_DIGESTIVE_TRACT_DEVELOPMENT	14	Up	0.511854
GO_MF_DR_TRANSFERASE_ACTIVITY_TRANSFERRING_HEXOSYL_GROUPS	25	Down	0.51342
GO_CC_DR_PERINUCLEAR_REGION_CYTOPLASM	17	Up	0.515827
GO_BP_DR_DETERMINATION_VENTRAL_IDENTITY	10	Down	0.516177
GO_MF_DR_ATP-DEPENDENT_DNA_HELICASE_ACTIVITY	8	Up	0.516425
GO_BP_DR_TAIL_MORPHOGENESIS	6	Up	0.516865
GO_MF_DR_HYDROLASE_ACTIVITY_ACTING_ON_ESTER_BONDS	29	Up	0.518757
GO_BP_DR_PROTEIN_AUTOPHOSPHORYLATION	10	Down	0.518894
GO_BP_DR_PROTEOLYSIS_CELLULAR_PROTEIN_CATABOLIC_PROCESS	16	Up	0.519501
GO_CC_DR_PROTEASOME_CORE_COMPLEX	16	Up	0.519501
GO_MF_DR_THREONINE-TYPE_ENDOPEPTIDASE_ACTIVITY	16	Up	0.519501
GO_MF_DR_G-PROTEIN_COUPLED_RECEPTOR_ACTIVITY	39	Down	0.52582
GO_BP_DR_INTRAHEPATIC_BILE_DUCT_DEVELOPMENT	6	Down	0.527642
GO_MF_DR_CATION_TRANSMEMBRANE_TRANSPORTER_ACTIVITY	13	Down	0.528001
GO_MF_DR_GLYCEROPHOSPHODIESTER_PHOSPHODIESTERASE_ACTIVITY	6	Down	0.529447
GO_MF_DR_OXIDOREDUCTASE_ACTIVITY_ACTING_ON_THE_CH-CH_GROUP_DONORS	19	Up	0.530392
GO_BP_DR_POSITIVE_REGULATION_I-KAPPAB_KINASE_NF-KAPPAB_CASCADE	7	Down	0.530426
GO_MF_DR_MRNA_BINDING	6	Down	0.530713
GO_BP_DR_CHROMOSOME_SEGREGATION	12	Up	0.532515
GO_BP_DR_NEURAL_CREST_MIGRATION	18	Down	0.533603
GO_MF_DR_ACTIN_BINDING	92	Down	0.534032
GO_BP_DR_AUTOPHAGY	12	Up	0.537862
GO_BP_DR_REGULATION_ANION_TRANSPORT	13	Up	0.538949
GO_BP_DR_INTRACELLULAR_PROTEIN_KINASE_CASCADE	9	Down	0.539709
GO_MF_DR_SYMPORTER_ACTIVITY	6	Up	0.545657
GO_BP_DR_PHOSPHATIDYLINOSITOL-MEDIATED_SIGNALING	7	Down	0.546647
GO_MF_DR_VOLTAGE-GATED_CHLORIDE_CHANNEL_ACTIVITY	9	Up	0.546868
GO_BP_DR_STRIATED_MUSCLE_DEVELOPMENT	8	Down	0.546998
GO_MF_DR_NUCLEASE_ACTIVITY	24	Up	0.547437
GO_MF_DR_SERINE-TYPE_ENDOPEPTIDASE_ACTIVITY	26	Down	0.547873
GO_MF_DR_DNA-DIRECTED_RNA_POLYMERASE_ACTIVITY	23	Up	0.548096
GO_BP_DR_EPHRIN_RECEPTOR_SIGNALING_PATHWAY	11	Down	0.549195
GO_BP_DR_EMBRYONIC_RETINA_MORPHOGENESIS_IN_CAMERA-TYPE_EYE	11	Down	0.549817
GO_MF_DR_ACYL-COA_DEHYDROGENASE_ACTIVITY	13	Down	0.550021
GO_BP_DR_LIPID_CATABOLIC_PROCESS	9	Down	0.551113
GO_CC_DR_KINESIN_COMPLEX	6	Up	0.552154
GO_CC_DR_EXTRACELLULAR_REGION	85	Up	0.553126
GO_BP_DR_TRNA_AMINOACYLATION	6	Up	0.555171
GO_CC_DR_CILIUM	18	Up	0.555812
GO_MF_DR_SIGNAL_TRANSDUCER_ACTIVITY	106	Down	0.558564
GO_BP_DR_RESPONSE_TO_DNA_DAMAGE_STIMULUS	33	Up	0.559725
GO_CC_DR_MHC_CLASS_I_PROTEIN_COMPLEX	7	Up	0.562219
GO_MF_DR_ADENYLATE_CYCLASE_ACTIVITY	6	Down	0.563628
GO_BP_DR_NEGATIVE_REGULATION_TRANSLATIONAL_INITIATION	6	Down	0.564029
GO_BP_DR_PROTEOLYSIS	206	Up	0.565838
GO_CC_DR_SMALL_RIBOSOMAL_SUBUNIT	8	Up	0.565957
GO_CC_DR_GOLGI_APPARATUS	76	Up	0.568252
GO_BP_DR_DNA_DUPLEX_UNWINDING	10	Up	0.568937
GO_MF_DR_ATP-DEPENDENT_HELICASE_ACTIVITY	67	Up	0.569985
GO_MF_DR_CAMP-DEPENDENT_PROTEIN_KINASE_REGULATOR_ACTIVITY	6	Down	0.570752
GO_MF_DR_PDZ_DOMAIN_BINDING	10	Up	0.573849
GO_BP_DR_GLUTAMINE_METABOLIC_PROCESS	6	Up	0.575338
GO_BP_DR_PROTEIN_DEPHOSPHORYLATION	73	Down	0.575779
GO_BP_DR_REGULATION_ARF_GTPASE_ACTIVITY	20	Down	0.576385
GO_MF_DR_ARF_GTPASE_ACTIVATOR_ACTIVITY	20	Down	0.576385
GO_BP_DR_NUCLEOTIDE_PHOSPHORYLATION	6	Up	0.57648
GO_BP_DR_MRNA_TRANSPORT	10	Down	0.577563
GO_MF_DR_TRANSCRIPTION_FACTOR_BINDING	27	Up	0.582308
GO_BP_DR_IRON-SULFUR_CLUSTER_ASSEMBLY	8	Up	0.582465
GO_BP_DR_DNA_REPAIR	87	Up	0.584282
GO_BP_DR_ANION_TRANSPORT	12	Down	0.584928
GO_BP_DR_CHROMATIN_MODIFICATION	29	Down	0.588879
GO_BP_DR_EMBRYONIC_VISCEROCRANIUM_MORPHOGENESIS	11	Down	0.589194
GO_MF_DR_NUCLEOTIDYLTRANSFERASE_ACTIVITY	35	Up	0.594506
GO_CC_DR_PREFOLDIN_COMPLEX	9	Down	0.595307
GO_BP_DR_PROTEIN_HOMOOLIGOMERIZATION	18	Down	0.595834
GO_BP_DR_CYCLE_ARREST	8	Up	0.5969
GO_BP_DR_POSITIVE_REGULATION_CYSTEINE-TYPE_ENDOPEPTIDASE_APOPTOTIC_PROCESS	7	Up	0.597462
GO_MF_DR_HYDROLASE_ACTIVITY_ACTING_ON_GLYCOSYL_BONDS	12	Up	0.597747
GO_BP_DR_ISOPRENOID_BIOSYNTHETIC_PROCESS	7	Up	0.5992
GO_BP_DR_SODIUM_ION_EXPORT	18	Up	0.599578
GO_CC_DR_ANAPHASE-PROMOTING_COMPLEX	7	Up	0.6009
GO_MF_DR_TRANSMEMBRANE_TRANSPORTER_ACTIVITY	15	Up	0.605141
GO_BP_DR_IMMUNE_RESPONSE	17	Up	0.605474
GO_BP_DR_ONE-CARBON_METABOLIC_PROCESS	10	Up	0.606066
GO_CC_DR_PCG_PROTEIN_COMPLEX	6	Down	0.610912
GO_BP_DR_NUCLEOSIDE_METABOLIC_PROCESS	10	Down	0.611677
GO_BP_DR_CYCLIC_NUCLEOTIDE_BIOSYNTHETIC_PROCESS	14	Down	0.611883
GO_MF_DR_PHOSPHORUS-OXYGEN_LYASE_ACTIVITY	14	Down	0.611883
GO_BP_DR_TRNA_MODIFICATION	8	Up	0.612104
GO_BP_DR_PROTEIN_UBIQUITINATION	54	Down	0.617265
GO_BP_DR_NEGATIVE_REGULATION_PROLIFERATION	6	Up	0.618711
GO_MF_DR_TRANSCRIPTION_COACTIVATOR_ACTIVITY	16	Down	0.619516
GO_BP_DR_BRAIN_DEVELOPMENT	31	Down	0.619654
GO_CC_DR_NUCLEAR_PORE	11	Down	0.621709
GO_BP_DR_GLYCINE_CATABOLIC_PROCESS	7	Up	0.62207
GO_MF_DR_OXIDOREDUCTASE_SINGLE_DONORS_MOLECULAR_OXYGEN_INCORPORATION_TWO_ATOMS_OXYGEN	15	Down	0.624446
GO_CC_DR_SPINDLE_POLE	6	Up	0.624662
GO_BP_DR_GASTRULATION	15	Up	0.629434
GO_BP_DR_VASCULATURE_DEVELOPMENT	11	Up	0.63219
GO_CC_DR_Z_DISC	9	Up	0.632975
GO_MF_DR_CALCIUM-DEPENDENT_CYSTEINE-TYPE_ENDOPEPTIDASE_ACTIVITY	8	Up	0.633989
GO_BP_DR_PIGMENTATION	6	Up	0.63429
GO_BP_DR_APOPTOTIC_PROCESS	37	Up	0.636505
GO_MF_DR_N-ACETYLTRANSFERASE_ACTIVITY	13	Up	0.638804
GO_BP_DR_MAGNESIUM_ION_TRANSPORT	7	Down	0.640315
GO_BP_DR_PATTERN_SPECIFICATION_PROCESS	17	Down	0.640574
GO_MF_DR_HYDROGEN_ION_TRANSPORTING_ATP_SYNTHASE_ACTIVITY_ROTATIONAL_MECHANISM	11	Up	0.642211
GO_CC_DR_APICAL_PLASMA_MEMBRANE	6	Up	0.643964
GO_MF_DR_CARBOXYLESTERASE_ACTIVITY	6	Up	0.647325
GO_BP_DR_MIDBRAIN-HINDBRAIN_BOUNDARY_DEVELOPMENT	8	Up	0.64742
GO_BP_DR_PROTEASOMAL_UBIQUITIN-DEPENDENT_PROTEIN_CATABOLIC_PROCESS	10	Up	0.649807
GO_MF_DR_HISTONE_ACETYLTRANSFERASE_ACTIVITY	7	Down	0.650048
GO_BP_DR_HISTONE_ACETYLATION	7	Down	0.650048
GO_MF_DR_RIBONUCLEASE_ACTIVITY	6	Down	0.652337
GO_MF_DR_GTPASE_REGULATOR_ACTIVITY	6	Down	0.65252
GO_CC_DR_P_GRANULE	8	Up	0.658965
GO_MF_DR_DNA-DIRECTED_DNA_POLYMERASE_ACTIVITY	15	Up	0.659117
GO_MF_DR_ENDOPEPTIDASE_ACTIVITY	18	Up	0.659967
GO_CC_DR_NUCLEAR_MEMBRANE	6	Up	0.660006
GO_BP_DR_MITOSIS	35	Up	0.661233
GO_BP_DR_ZINC_ION_TRANSPORT	8	Up	0.663955
GO_BP_DR_ZINC_ION_TRANSMEMBRANE_TRANSPORT	8	Up	0.663955
GO_MF_DR_ZINC_ION_TRANSMEMBRANE_TRANSPORTER_ACTIVITY	8	Up	0.663955
GO_MF_DR_G-PROTEIN_BETA_GAMMA-SUBUNIT_COMPLEX_BINDING	8	Down	0.665404
GO_MF_DR_MAGNESIUM_ION_BINDING	68	Up	0.666041
GO_BP_DR_HINDBRAIN_DEVELOPMENT	13	Down	0.666401
GO_MF_DR_RNA_METHYLTRANSFERASE_ACTIVITY	7	Down	0.667057
GO_BP_DR_ENDOCYTOSIS	10	Up	0.669053
GO_MF_DR_SULFOTRANSFERASE_ACTIVITY	14	Down	0.669472
GO_CC_DR_PROTON-TRANSPORTING_TWO-SECTOR_ATPASE_COMPLEX_CATALYTIC_DOMAIN	7	Up	0.672397
GO_MF_DR_DOUBLE-STRANDED_RNA_BINDING	18	Up	0.674086
GO_MF_DR_INORGANIC_ANION_EXCHANGER_ACTIVITY	6	Down	0.674132
GO_MF_DR_ANION_TRANSMEMBRANE_TRANSPORTER_ACTIVITY	6	Down	0.674132
GO_BP_DR_SODIUM_ION_TRANSPORT	12	Down	0.674714
GO_CC_DR_CONDENSED_CHROMOSOME_KINETOCHORE	8	Down	0.675089
GO_BP_DR_REGULATION_ACTIN_FILAMENT_POLYMERIZATION	7	Up	0.67737
GO_BP_DR_CYTOSKELETON_ORGANIZATION	16	Down	0.679188
GO_BP_DR_AMINO_ACID_TRANSMEMBRANE_TRANSPORT	11	Down	0.68047
GO_BP_DR_ION_TRANSMEMBRANE_TRANSPORT	99	Down	0.683286
GO_MF_DR_ACID_PHOSPHATASE_ACTIVITY	9	Down	0.688929
GO_MF_DR_COFACTOR_BINDING	12	Up	0.690155
GO_MF_DR_DNA_TOPOISOMERASE_TYPE_I_ACTIVITY	9	Down	0.69036
GO_BP_DR_CELLULAR_PROCESS	7	Up	0.694269
GO_BP_DR_LIPID_TRANSPORT	20	Up	0.697757
GO_BP_DR_PENTOSE-PHOSPHATE_SHUNT	9	Down	0.70331
GO_BP_DR_REGULATION_SEQUENCE-SPECIFIC_DNA_BINDING_TRANSCRIPTION_FACTOR_ACTIVITY	17	Up	0.707393
GO_MF_DR_SERINE-TYPE_PEPTIDASE_ACTIVITY	22	Down	0.710387
GO_MF_DR_SINGLE-STRANDED_DNA_BINDING	13	Down	0.712592
GO_MF_DR_CYSTEINE-TYPE_ENDOPEPTIDASE_ACTIVITY	19	Down	0.716363
GO_MF_DR_UBIQUITIN_THIOLESTERASE_ACTIVITY	48	Up	0.722632
GO_CC_DR_PROTEIN_PHOSPHATASE_TYPE_2A_COMPLEX	7	Down	0.72325
GO_MF_DR_PROTEIN_PHOSPHATASE_TYPE_2A_REGULATOR_ACTIVITY	7	Down	0.72325
GO_BP_DR_PROTEIN_IMPORT_MITOCHONDRIAL_INNER_MEMBRANE	6	Up	0.726457
GO_CC_DR_MITOCHONDRIAL_INTERMEMBRANE_SPACE_PROTEIN_TRANSPORTER_COMPLEX	6	Up	0.726457
GO_CC_DR_NUCLEOPLASM	11	Up	0.727072
GO_BP_DR_MEIOSIS	9	Down	0.727572
GO_MF_DR_EXONUCLEASE_ACTIVITY	16	Up	0.728505
GO_CC_DR_CULLIN-RING_UBIQUITIN_LIGASE_COMPLEX	7	Down	0.730031
GO_MF_DR_UBIQUITIN_PROTEIN_LIGASE_BINDING	7	Down	0.730031
GO_MF_DR_CALCIUM-TRANSPORTING_ATPASE_ACTIVITY	8	Down	0.730437
GO_BP_DR_DNA_METHYLATION	8	Up	0.731064
GO_BP_DR_POSITIVE_REGULATION_GTPASE_ACTIVITY	35	Down	0.732803
GO_MF_DR_PEPTIDASE_ACTIVITY	117	Up	0.7343
GO_BP_DR_POSITIVE_DNA-DEPENDENT	35	Up	0.734365
GO_BP_DR_RESPONSE_TO_METHYLMERCURY	7	Up	0.735845
GO_MF_DR_EPHRIN_RECEPTOR_ACTIVITY	10	Down	0.737027
GO_BP_DR_CENTRAL_NERVOUS_SYSTEM_DEVELOPMENT	8	Up	0.738711
GO_BP_DR_SMALL_GTPASE_MEDIATED_SIGNAL_TRANSDUCTION	156	Up	0.742022
GO_MF_DR_MAGNESIUM_ION_TRANSMEMBRANE_TRANSPORTER_ACTIVITY	6	Down	0.743882
GO_BP_DR_NERVOUS_SYSTEM_DEVELOPMENT	20	Down	0.745578
GO_CC_DR_AXON	7	Down	0.747891
GO_MF_DR_ATPASE_ACTIVITY_COUPLED_TO_TRANSMEMBRANE_MOVEMENT_IONS_PHOSPHORYLATIVE_MECHANISM	26	Down	0.751143
GO_MF_DR_MICROTUBULE_MOTOR_ACTIVITY	39	Down	0.751451
GO_BP_DR_TRNA_PROCESSING	28	Up	0.754435
GO_MF_DR_HELICASE_ACTIVITY	93	Up	0.760181
GO_CC_DR_TIGHT_JUNCTION	20	Down	0.760371
GO_MF_DR_AMINO_ACID_TRANSMEMBRANE_TRANSPORTER_ACTIVITY	8	Up	0.761542
GO_BP_DR_POSITIVE_REGULATION_APOPTOTIC_PROCESS	21	Down	0.761909
GO_BP_DR_TRANSCRIPTION_FROM_RNA_POLYMERASE_II_PROMOTER	7	Up	0.768141
GO_BP_DR_PANCREAS_DEVELOPMENT	14	Down	0.769163
GO_BP_DR_KUPFFERS_VESICLE_DEVELOPMENT	18	Down	0.769244
GO_MF_DR_GROWTH_FACTOR_ACTIVITY	15	Down	0.771502
GO_BP_DR_PROTEIN_TARGETING_TO_MITOCHONDRION	9	Down	0.771611
GO_BP_DR_NUCLEAR-TRANSCRIBED_MRNA_CATABOLIC_PROCESS_NONSENSE-MEDIATED_DECAY	9	Down	0.773334
GO_BP_DR_EMBRYONIC_PECTORAL_FIN_MORPHOGENESIS	7	Down	0.773525
GO_MF_DR_GLUTATHIONE_TRANSFERASE_ACTIVITY	6	Up	0.775153
GO_MF_DR_ACTIN_FILAMENT_BINDING	10	Up	0.775255
GO_BP_DR_PHOSPHATIDYLINOSITOL_PHOSPHORYLATION	21	Up	0.775798
GO_CC_DR_KINETOCHORE	9	Up	0.777484
GO_BP_DR_NEURON_DIFFERENTIATION	8	Up	0.778013
GO_BP_DR_ERYTHROCYTE_DIFFERENTIATION	8	Up	0.782407
GO_BP_DR_MELANOCYTE_DIFFERENTIATION	9	Up	0.784031
GO_BP_DR_CELLULAR_AMINO_ACID_BIOSYNTHETIC_PROCESS	7	Up	0.788884
GO_BP_DR_CYTOKINESIS	6	Down	0.795453
GO_BP_DR_LIPID_BIOSYNTHETIC_PROCESS	9	Up	0.797711
GO_BP_DR_HEART_LOOPING	29	Up	0.797772
GO_BP_DR_LIPID_METABOLIC_PROCESS	54	Up	0.798588
GO_BP_DR_NUCLEAR_MRNA_SPLICING_VIA_SPLICEOSOME	10	Up	0.798685
GO_BP_DR_RESPONSE_TO_CADMIUM_ION	6	Up	0.802972
GO_MF_DR_UBIQUITIN-PROTEIN_LIGASE_ACTIVITY	61	Down	0.802976
GO_BP_DR_RNA_METHYLATION	10	Up	0.803019
GO_MF_DR_CHROMATIN_BINDING	18	Down	0.803756
GO_BP_DR_CELL-ADHESION	8	Down	0.807305
GO_BP_DR_G-PROTEIN_COUPLED_RECEPTOR_SIGNALING_PATHWAY	80	Down	0.807612
GO_BP_DR_EMBRYO_DEVELOPMENT	67	Down	0.809727
GO_BP_DR_SPERMATOGENESIS	8	Down	0.811018
GO_CC_DR_TRANSCRIPTION_FACTOR_COMPLEX	50	Down	0.811129
GO_BP_DR_PATTERNING_BLOOD_VESSELS	7	Up	0.811974
GO_CC_DR_EUKARYOTIC_TRANSLATION_INITIATION_FACTOR_3_COMPLEX	6	Up	0.813267
GO_MF_DR_PROTEIN_SERINE_THREONINE_PHOSPHATASE_ACTIVITY	15	Down	0.813437
GO_BP_DR_PHOSPHATIDYLINOSITOL_METABOLIC_PROCESS	6	Up	0.815502
GO_MF_DR_PHOSPHATIDYLINOSITOL_PHOSPHATE_KINASE_ACTIVITY	6	Up	0.815502
GO_MF_DR_CYSTEINE-TYPE_ENDOPEPTIDASE_INHIBITOR_ACTIVITY	6	Down	0.815678
GO_BP_DR_EMBRYONIC_HEART_TUBE_MORPHOGENESIS	10	Down	0.816371
GO_CC_DR_INTEGRAL_TO_ENDOPLASMIC_RETICULUM_MEMBRANE	10	Down	0.821723
GO_BP_DR_RNA_SPLICING	28	Up	0.82603
GO_MF_DR_UBIQUITIN-SPECIFIC_PROTEASE_ACTIVITY	8	Up	0.826407
GO_MF_DR_2_IRON_2_SULFUR_CLUSTER_BINDING	11	Down	0.828263
GO_BP_DR_VASCULOGENESIS	17	Up	0.829198
GO_MF_DR_RNA_BINDING	228	Down	0.8319
GO_BP_DR_PROLIFERATION	11	Up	0.834772
GO_BP_DR_BMP_SIGNALING_PATHWAY	7	Down	0.834898
GO_BP_DR_REGULATION_RAB_GTPASE_ACTIVITY	34	Down	0.837048
GO_MF_DR_RAB_GTPASE_ACTIVATOR_ACTIVITY	34	Down	0.837048
GO_BP_DR_REGULATION_RHO_PROTEIN_SIGNAL_TRANSDUCTION	54	Down	0.840067
GO_MF_DR_RHO_GUANYL-NUCLEOTIDE_EXCHANGE_FACTOR_ACTIVITY	54	Down	0.840067
GO_BP_DR_MISMATCH_REPAIR	6	Up	0.840569
GO_MF_DR_MISMATCHED_DNA_BINDING	6	Up	0.840569
GO_BP_DR_NEGATIVE_REGULATION_APOPTOTIC_PROCESS	22	Up	0.841774
GO_MF_DR_G-PROTEIN_COUPLED_RECEPTOR_BINDING	6	Up	0.842282
GO_BP_DR_WNT_RECEPTOR_SIGNALING_PATHWAY	31	Down	0.842428
GO_MF_DR_MANNOSYL-OLIGOSACCHARIDE_12-ALPHA-MANNOSIDASE_ACTIVITY	7	Up	0.849151
GO_CC_DR_PROTEASOME_CORE_COMPLEX_ALPHA-SUBUNIT_COMPLEX	8	Up	0.85074
GO_MF_DR_PHOSPHOLIPID-TRANSLOCATING_ATPASE_ACTIVITY	10	Down	0.856045
GO_MF_DR_OXIDOREDUCTASE_ACTIVITY_ACTING_ON_THE_ALDEHYDE_OR_OXO_GROUP_DONORS_NAD_OR_NADP_AS_ACCEPTOR	14	Down	0.856441
GO_MF_DR_ADENOSINE_DEAMINASE_ACTIVITY	6	Down	0.857531
GO_MF_DR_ENDOPEPTIDASE_INHIBITOR_ACTIVITY	8	Up	0.858646
GO_CC_DR_EXTRACELLULAR_MATRIX	10	Down	0.860292
GO_BP_DR_PIGMENT_GRANULE_AGGREGATION_IN_CENTER	6	Up	0.860881
GO_BP_DR_BRAIN_MORPHOGENESIS	6	Down	0.8618
GO_CC_DR_BASOLATERAL_PLASMA_MEMBRANE	7	Down	0.862841
GO_MF_DR_HYDROLASE_ACTIVITY_ACTING_ON_CARBON-NITROGEN_BUT_NOT_PEPTIDE_BONDS	8	Down	0.864886
GO_BP_DR_CARBOHYDRATE_METABOLIC_PROCESS	99	Up	0.868528
GO_CC_DR_MITOCHONDRIAL_PROTON-TRANSPORTING_ATP_SYNTHASE_COMPLEX_COUPLING_FACTOR_FO	7	Down	0.868574
GO_CC_DR_MITOCHONDRIAL_ENVELOPE	6	Down	0.870229
GO_BP_DR_KIDNEY_DEVELOPMENT	7	Down	0.870437
GO_BP_DR_DOUBLE-STRAND_BREAK_REPAIR_VIA_HOMOLOGOUS_RECOMBINATION	6	Up	0.870647
GO_BP_DR_UBIQUITIN-DEPENDENT_PROTEIN_CATABOLIC_PROCESS	72	Down	0.871466
GO_BP_DR_NEGATIVE_REGULATION_CANONICAL_WNT_RECEPTOR_SIGNALING_PATHWAY	6	Up	0.873267
GO_MF_DR_SOLUTEHYDROGEN_ANTIPORTER_ACTIVITY	7	Up	0.873802
GO_BP_DR_GLYCEROL_METABOLIC_PROCESS	7	Down	0.878375
GO_CC_DR_SEPTIN_COMPLEX	8	Down	0.880445
GO_BP_DR_MIGRATION	8	Up	0.882073
GO_BP_DR_CELLULAR_PROTEIN_METABOLIC_PROCESS	13	Up	0.88514
GO_BP_DR_CENTRAL_NERVOUS_SYSTEM_MORPHOGENESIS	6	Down	0.888665
GO_BP_DR_CELL-MATRIX_ADHESION	11	Down	0.892041
GO_MF_DR_FLAVIN_ADENINE_DINUCLEOTIDE_BINDING	37	Down	0.892832
GO_BP_DR_REGULATION_NEURON_APOPTOTIC_PROCESS	6	Up	0.897698
GO_CC_DR_CYTOPLASMIC_VESICLE	10	Down	0.898121
GO_BP_DR_OTOLITH_DEVELOPMENT	6	Down	0.898661
GO_BP_DR_RETINA_LAYER_FORMATION	13	Up	0.898697
GO_CC_DR_CYTOSOLIC_SMALL_RIBOSOMAL_SUBUNIT	6	Up	0.900282
GO_MF_DR_35-CYCLIC-NUCLEOTIDE_PHOSPHODIESTERASE_ACTIVITY	10	Down	0.902281
GO_BP_DR_PROTEOGLYCAN_BIOSYNTHETIC_PROCESS	7	Down	0.902898
GO_BP_DR_GENE_SILENCING_BY_RNA	12	Down	0.90307
GO_MF_DR_LIGAND-ACTIVATED_SEQUENCE-SPECIFIC_DNA_BINDING_RNA_POLYMERASE_II_TRANSCRIPTION_FACTOR_ACTIVITY	11	Down	0.905417
GO_MF_DR_PHOSPHOGLUCONATE_DEHYDROGENASE_DECARBOXYLATING_ACTIVITY	6	Down	0.907307
GO_BP_DR_GLUCOSE_METABOLIC_PROCESS	6	Down	0.907425
GO_BP_DR_SKELETAL_MUSCLE_TISSUE_DEVELOPMENT	7	Down	0.908417
GO_MF_DR_TRANSFORMING_GROWTH_FACTOR_BETA-ACTIVATED_RECEPTOR_ACTIVITY	7	Down	0.91158
GO_MF_DR_CYSTEINE-TYPE_PEPTIDASE_ACTIVITY	57	Down	0.9127
GO_BP_DR_REGULATION_SIGNAL_TRANSDUCTION	10	Down	0.913017
GO_BP_DR_SOMITOGENESIS	32	Up	0.913629
GO_MF_DR_GUANYL_NUCLEOTIDE_BINDING	30	Down	0.91986
GO_MF_DR_TRANSFERASE_ACTIVITY	415	Down	0.921136
GO_MF_DR_CYTOSKELETAL_PROTEIN_BINDING	14	Down	0.925748
GO_CC_DR_CENTROSOME	7	Down	0.927852
GO_BP_DR_CHLORIDE_TRANSPORT	13	Up	0.929357
GO_BP_DR_NEGATIVE_REGULATION_WNT_RECEPTOR_SIGNALING_PATHWAY	10	Up	0.929626
GO_MF_DR_DOUBLE-STRANDED_DNA_BINDING	20	Up	0.932547
GO_BP_DR_FOREBRAIN_DEVELOPMENT	8	Up	0.933541
GO_MF_DR_METALLOPEPTIDASE_ACTIVITY	32	Up	0.933673
GO_CC_DR_ACTIN_CYTOSKELETON	16	Down	0.934857
GO_BP_DR_POSITIVE_REGULATION_PROLIFERATION	7	Up	0.934879
GO_CC_DR_FLAGELLUM	6	Down	0.935952
GO_MF_DR_OMEGA_PEPTIDASE_ACTIVITY	7	Down	0.937161
GO_BP_DR_NEGATIVE_REGULATION_CYSTEINE-TYPE_ENDOPEPTIDASE_APOPTOTIC_PROCESS	6	Down	0.942068
GO_BP_DR_RESPONSE_TO_BACTERIUM	6	Down	0.94245
GO_BP_DR_MIGRATION_GASTRULATION	32	Up	0.942847
GO_BP_DR_MYOFIBRIL_ASSEMBLY	6	Down	0.944674
GO_MF_DR_METALLOENDOPEPTIDASE_ACTIVITY	49	Up	0.944849
GO_MF_DR_NUCLEIC_ACID_BINDING_TRANSCRIPTION_FACTOR_ACTIVITY	6	Up	0.946941
GO_BP_DR_CONVERGENT_EXTENSION_AXIS_ELONGATION	13	Down	0.94899
GO_BP_DR_DEFINITIVE_HEMOPOIESIS	6	Up	0.952062
GO_BP_DR_EPITHELIAL_TO_MESENCHYMAL_TRANSITION	6	Up	0.953151
GO_BP_DR_GLYCEROL_ETHER_METABOLIC_PROCESS	7	Down	0.954346
GO_BP_DR_RNA_PROCESSING	42	Up	0.956464
GO_BP_DR_HEMOPOIESIS	22	Up	0.961041
GO_BP_DR_DORSAL_CONVERGENCE	8	Down	0.961995
GO_BP_DR_INDUCTION_APOPTOSIS	7	Down	0.96232
GO_MF_DR_OXIDOREDUCTASE_ACTIVITY_ACTING_ON_CH-OH_GROUP_DONORS	8	Down	0.962459
GO_BP_DR_TISSUE_DEVELOPMENT	10	Up	0.969102
GO_BP_DR_SKELETAL_SYSTEM_DEVELOPMENT	9	Up	0.969861
GO_MF_DR_PEPTIDYL-PROLYL_CIS-TRANS_ISOMERASE_ACTIVITY	22	Down	0.977072
GO_BP_DR_NUCLEOBASE-CONTAINING_COMPOUND_METABOLIC_PROCESS	26	Down	0.9793
GO_BP_DR_PRONEPHROS_DEVELOPMENT	19	Up	0.980846
GO_CC_DR_GOLGI_CISTERNA_MEMBRANE	7	Up	0.982941
GO_BP_DR_NEURAL_CREST_DEVELOPMENT	10	Up	0.983459
GO_BP_DR_ENDODERM_FORMATION	8	Up	0.986631
GO_MF_DR_RNA_POLYMERASE_II_DISTAL_ENHANCER_SEQUENCE-SPECIFIC_DNA_BINDING_TRANSCRIPTION_FACTOR_ACTIVITY	17	Up	0.986878
GO_MF_DR_DNA_BINDING_BENDING	17	Up	0.986878
GO_MF_DR_NUCLEIC_ACID_BINDING	698	Down	0.986975
GO_CC_DR_MITOCHONDRIAL_OUTER_MEMBRANE	22	Up	0.990152
GO_BP_DR_PHOSPHOLIPID_TRANSPORT	12	Down	0.995028
GO_BP_DR_PROTEIN_CATABOLIC_PROCESS	19	Up	0.996543
GO_BP_DR_POSITIVE_REGULATION_RAB_GTPASE_ACTIVITY	21	Down	0.998124
GO_BP_DR_PROTEIN_UBIQUITINATION_UBIQUITIN-DEPENDENT_PROTEIN_CATABOLIC_PROCESS	10	Down	0.99904

## Sheet: S2_7
Term	NGenes	Direction	PValue
GO_MF_DR_DNA_BINDING	595	Down	5.33033e-07
GO_BP_DR_PROTEIN_TRANSPORT	193	Up	6.4863e-07
GO_MF_DR_PHOSPHOLIPID_BINDING	187	Down	1.40452e-05
GO_MF_DR_PHOSPHOLIPASE_C_ACTIVITY	11	Down	0.00041637
GO_MF_DR_PHOSPHATIDYLINOSITOL_PHOSPHOLIPASE_C_ACTIVITY	10	Down	0.00060092
GO_BP_DR_TRANSPORT	356	Up	0.000896371
GO_CC_DR_EXTRACELLULAR_SPACE	24	Up	0.00102612
GO_BP_DR_GLYCOLYSIS	13	Up	0.00115288
GO_BP_DR_DNA-DEPENDENT	454	Down	0.00117511
GO_BP_DR_INTRACELLULAR_PROTEIN_TRANSPORT	181	Up	0.00144905
GO_BP_DR_RESPONSE_TO_CHEMICAL_STIMULUS	23	Up	0.00178944
GO_BP_DR_RESPONSE_TO_STRESS	28	Up	0.00193329
GO_BP_DR_INTRACELLULAR_SIGNAL_TRANSDUCTION	129	Down	0.00194996
GO_BP_DR_PROTEIN_PHOSPHORYLATION	370	Down	0.00207166
GO_MF_DR_PROTEIN_TYROSINE_KINASE_ACTIVITY	337	Down	0.00246222
GO_CC_DR_RESPIRATORY_CHAIN	10	Up	0.00273373
GO_MF_DR_PHOSPHORIC_DIESTER_HYDROLASE_ACTIVITY	28	Down	0.00304817
GO_BP_DR_AXON_EXTENSION	6	Down	0.00312883
GO_MF_DR_TRANSFERASE_ACTIVITY_TRANSFERRING_PHOSPHORUS-CONTAINING_GROUPS	390	Down	0.00370701
GO_CC_DR_MITOCHONDRIAL_INNER_MEMBRANE	48	Up	0.00372931
GO_MF_DR_CATALYTIC_ACTIVITY	420	Up	0.00419962
GO_CC_DR_CYTOPLASM	675	Up	0.00486718
GO_BP_DR_GASTRULATION_WITH_MOUTH_FORMING_SECOND	9	Up	0.00491286
GO_MF_DR_PROTEIN_KINASE_ACTIVITY	360	Down	0.00497021
GO_BP_DR_COMMUNICATION	52	Down	0.00575037
GO_MF_DR_TRANSMEMBRANE_SIGNALING_RECEPTOR_ACTIVITY	24	Down	0.00651062
GO_MF_DR_KINASE_ACTIVITY	305	Down	0.00672072
GO_MF_DR_OXIDOREDUCTASE_ACTIVITY_ACTING_ON_THE_CH-OH_GROUP_DONORS_NAD_OR_NADP_AS_ACCEPTOR	34	Up	0.00681053
GO_BP_DR_DNA_REPLICATION	54	Down	0.00684764
GO_BP_DR_EMBRYONIC_CRANIAL_SKELETON_MORPHOGENESIS	12	Down	0.00792252
GO_MF_DR_ACID-AMINO_ACID_LIGASE_ACTIVITY	64	Up	0.00793511
GO_CC_DR_CHROMOSOME_CENTROMERIC_REGION	17	Up	0.00840892
GO_BP_DR_METABOLIC_PROCESS	775	Up	0.00886291
GO_CC_DR_MITOCHONDRION	125	Up	0.00989418
GO_MF_DR_SERINE-TYPE_ENDOPEPTIDASE_INHIBITOR_ACTIVITY	16	Down	0.0112892
GO_BP_DR_NUCLEOCYTOPLASMIC_TRANSPORT	63	Up	0.0120288
GO_BP_DR_SKELETAL_MUSCLE_FIBER_DEVELOPMENT	7	Down	0.0125885
GO_BP_DR_REGULATION_SMALL_GTPASE_MEDIATED_SIGNAL_TRANSDUCTION	31	Down	0.0127498
GO_MF_DR_OXIDOREDUCTASE_ACTIVITY	252	Up	0.0128445
GO_BP_DR_GTP_CATABOLIC_PROCESS	140	Up	0.0134597
GO_BP_DR_ELECTRON_TRANSPORT_CHAIN	16	Up	0.0148132
GO_CC_DR_EXTRACELLULAR_REGION	85	Up	0.0150617
GO_CC_DR_ENDOPLASMIC_RETICULUM_MEMBRANE	53	Up	0.0157364
GO_BP_DR_LIPOPOLYSACCHARIDE_BIOSYNTHETIC_PROCESS	37	Down	0.0184253
GO_MF_DR_RECEPTOR_ACTIVITY	267	Down	0.0201744
GO_BP_DR_RESPONSE_TO_METHYLMERCURY	7	Up	0.0220162
GO_BP_DR_FIN_DEVELOPMENT	8	Down	0.0226587
GO_MF_DR_P-P-BOND-HYDROLYSIS-DRIVEN_PROTEIN_TRANSMEMBRANE_TRANSPORTER_ACTIVITY	6	Up	0.0230129
GO_BP_DR_GASTRULATION	15	Up	0.023881
GO_MF_DR_DNA-DEPENDENT_ATPASE_ACTIVITY	8	Down	0.0240609
GO_BP_DR_POSITIVE_REGULATION_CYSTEINE-TYPE_ENDOPEPTIDASE_APOPTOTIC_PROCESS	7	Up	0.024417
GO_BP_DR_RESPONSE_TO_OXIDATIVE_STRESS	6	Down	0.0246073
GO_MF_DR_GTP_BINDING	237	Up	0.0246204
GO_MF_DR_SCAVENGER_RECEPTOR_ACTIVITY	6	Down	0.0248251
GO_MF_DR_TRANSMEMBRANE_RECEPTOR_PROTEIN_TYROSINE_KINASE_ACTIVITY	15	Down	0.0251266
GO_MF_DR_PHOSPHOTRANSFERASE_ACTIVITY_ALCOHOL_GROUP_AS_ACCEPTOR	74	Down	0.0256926
GO_MF_DR_CALCIUM_CHANNEL_ACTIVITY	11	Down	0.0258796
GO_BP_DR_EYE_DEVELOPMENT	8	Up	0.0259407
GO_MF_DR_TRANSFERASE_ACTIVITY	415	Down	0.0261412
GO_BP_DR_PHOSPHORYLATION	316	Down	0.026546
GO_BP_DR_CYTOKINE-MEDIATED_SIGNALING_PATHWAY	6	Down	0.0267452
GO_BP_DR_REGULATION_CYCLE	30	Up	0.0274218
GO_BP_DR_REGULATION_CATALYTIC_ACTIVITY	97	Down	0.0284121
GO_BP_DR_OXIDATION-REDUCTION_PROCESS	337	Up	0.0284989
GO_BP_DR_CONVERGENT_EXTENSION	13	Down	0.0288825
GO_MF_DR_HEME_BINDING	34	Up	0.0295918
GO_BP_DR_CYCLE_ARREST	8	Up	0.0299409
GO_MF_DR_LIPID_BINDING	16	Up	0.0313785
GO_BP_DR_DIVISION	59	Up	0.0316449
GO_BP_DR_SRP-DEPENDENT_COTRANSLATIONAL_PROTEIN_TARGETING_TO_MEMBRANE	6	Up	0.031663
GO_CC_DR_UBIQUITIN_LIGASE_COMPLEX	16	Down	0.0320339
GO_MF_DR_PYRIDOXAL_PHOSPHATE_BINDING	32	Up	0.0320387
GO_BP_DR_RESPONSE_TO_CADMIUM_ION	6	Up	0.0320527
GO_BP_DR_EPIBOLY_GASTRULATION_WITH_MOUTH_FORMING_SECOND	16	Up	0.03223
GO_MF_DR_HYDROLASE_ACTIVITY_ACTING_ON_ACID_ANHYDRIDES_IN_PHOSPHORUS-CONTAINING_ANHYDRIDES	14	Down	0.0322648
GO_CC_DR_CYTOSKELETON	109	Down	0.0322948
GO_CC_DR_ENDOPLASMIC_RETICULUM	93	Up	0.0325972
GO_MF_DR_TRANSFERASE_ACTIVITY_TRANSFERRING_GLYCOSYL_GROUPS	74	Down	0.0334134
GO_MF_DR_PROTEIN_HETERODIMERIZATION_ACTIVITY	12	Up	0.0354015
GO_MF_DR_PROTEIN_SERINE_THREONINE_KINASE_ACTIVITY	223	Down	0.0381768
GO_MF_DR_HYDROLASE_ACTIVITY_ACTING_ON_ACID_ANHYDRIDES	14	Down	0.039186
GO_BP_DR_DNA_METABOLIC_PROCESS	10	Down	0.0395387
GO_BP_DR_SIGNAL_TRANSDUCTION	382	Down	0.0405379
GO_CC_DR_MEMBRANE_COAT	15	Up	0.0414368
GO_MF_DR_GTPASE_ACTIVITY	169	Up	0.0416744
GO_BP_DR_AUTOPHAGIC_VACUOLE_ASSEMBLY	7	Up	0.0417164
GO_MF_DR_GTPASE_ACTIVATOR_ACTIVITY	32	Down	0.0417548
GO_MF_DR_PROTEIN_HOMODIMERIZATION_ACTIVITY	20	Up	0.0420054
GO_BP_DR_MULTICELLULAR_ORGANISMAL_DEVELOPMENT	167	Down	0.0423728
GO_MF_DR_PROTEIN_KINASE_BINDING	21	Up	0.0431257
GO_MF_DR_CARBOXYPEPTIDASE_ACTIVITY	8	Up	0.0462649
GO_BP_DR_HOMOPHILIC_ADHESION	20	Down	0.0467582
GO_BP_DR_CAMERA-TYPE_EYE_DEVELOPMENT	12	Down	0.0490605
GO_BP_DR_CYCLE	76	Up	0.0494626
GO_BP_DR_HEART_MORPHOGENESIS	13	Down	0.0510009
GO_MF_DR_CALCIUM-DEPENDENT_PHOSPHOLIPID_BINDING	7	Up	0.0517984
GO_BP_DR_TRICARBOXYLIC_ACID_CYCLE	15	Up	0.0536277
GO_BP_DR_RNA_SPLICING	28	Up	0.0540155
GO_CC_DR_MITOCHONDRIAL_MATRIX	9	Up	0.0556471
GO_BP_DR_PEPTIDYL-PROLINE_MODIFICATION	8	Down	0.0559976
GO_MF_DR_FK506_BINDING	8	Down	0.0559976
GO_BP_DR_ADHESION	57	Down	0.0561147
GO_MF_DR_GUANYL-NUCLEOTIDE_EXCHANGE_FACTOR_ACTIVITY	42	Down	0.0568455
GO_MF_DR_CHAPERONE_BINDING	8	Up	0.0586469
GO_BP_DR_NEGATIVE_REGULATION_CATALYTIC_ACTIVITY	6	Up	0.0592186
GO_BP_DR_RECEPTOR-MEDIATED_ENDOCYTOSIS	7	Down	0.0596674
GO_BP_DR_PROTEIN_IMPORT_NUCLEUS	9	Up	0.0597126
GO_CC_DR_CYTOSOL	49	Up	0.0602503
GO_CC_DR_INTEGRAL_TO_PLASMA_MEMBRANE	23	Down	0.0609073
GO_BP_DR_APOPTOTIC_PROCESS	37	Up	0.0613699
GO_MF_DR_STEROID_BINDING	6	Down	0.0622524
GO_BP_DR_ENDODERM_FORMATION	8	Up	0.0624495
GO_BP_DR_ANTERIOR_POSTERIOR_PATTERN_SPECIFICATION	13	Down	0.0631794
GO_MF_DR_ELECTRON_CARRIER_ACTIVITY	53	Up	0.0638807
GO_BP_DR_ATP_HYDROLYSIS_COUPLED_PROTON_TRANSPORT	19	Up	0.0642628
GO_BP_DR_ATP_SYNTHESIS_COUPLED_ELECTRON_TRANSPORT	6	Up	0.0658743
GO_BP_DR_EMBRYONIC_HEART_TUBE_DEVELOPMENT	12	Up	0.0665813
GO_CC_DR_PROTEINACEOUS_EXTRACELLULAR_MATRIX	11	Up	0.0668041
GO_BP_DR_NOTOCHORD_DEVELOPMENT2	11	Up	0.0669669
GO_MF_DR_NAD_BINDING	9	Up	0.0691005
GO_BP_DR_BMP_SIGNALING_PATHWAY	7	Up	0.0692945
GO_BP_DR_IMMUNE_RESPONSE	17	Up	0.0705161
GO_BP_DR_BASE-EXCISION_REPAIR	9	Down	0.0714577
GO_MF_DR_AMINOACYL-TRNA_EDITING_ACTIVITY	7	Up	0.0744592
GO_BP_DR_INNER_EAR_DEVELOPMENT	7	Down	0.0753477
GO_BP_DR_INTRACELLULAR_TRANSPORT	11	Down	0.0790023
GO_BP_DR_RESPONSE_TO_LIGHT_STIMULUS	8	Up	0.0796034
GO_BP_DR_RNA_MODIFICATION	13	Down	0.0803915
GO_MF_DR_PSEUDOURIDINE_SYNTHASE_ACTIVITY	13	Down	0.081834
GO_MF_DR_MANGANESE_ION_BINDING	9	Up	0.0825126
GO_MF_DR_ION_CHANNEL_ACTIVITY	57	Down	0.0827018
GO_BP_DR_SURFACE_RECEPTOR_SIGNALING_PATHWAY	23	Down	0.0841096
GO_MF_DR_CAMP-DEPENDENT_PROTEIN_KINASE_REGULATOR_ACTIVITY	6	Down	0.0845256
GO_MF_DR_TRANSCRIPTION_REGULATORY_REGION_SEQUENCE-SPECIFIC_DNA_BINDING	6	Down	0.0864285
GO_BP_DR_TRANSCRIPTION_DNA-DEPENDENT	218	Down	0.0875424
GO_BP_DR_HEART_DEVELOPMENT	53	Up	0.0882774
GO_BP_DR_NEGATIVE_DNA-DEPENDENT	27	Down	0.0898368
GO_CC_DR_LATE_ENDOSOME_MEMBRANE	7	Up	0.093497
GO_CC_DR_CHROMATIN	7	Down	0.0962947
GO_BP_DR_RETINAL_GANGLION_AXON_GUIDANCE	16	Down	0.0971513
GO_BP_DR_TRANSMEMBRANE_RECEPTOR_PROTEIN_TYROSINE_KINASE_SIGNALING_PATHWAY	22	Down	0.0976888
GO_BP_DR_SPINAL_CORD_MOTOR_NEURON_DIFFERENTIATION	6	Down	0.0977547
GO_BP_DR_TRANSMEMBRANE_TRANSPORT	222	Up	0.101187
GO_BP_DR_EMBRYONIC_VISCEROCRANIUM_MORPHOGENESIS	11	Down	0.101521
GO_BP_DR_PSEUDOURIDINE_SYNTHESIS	12	Down	0.101881
GO_MF_DR_CYTOCHROME-C_OXIDASE_ACTIVITY	13	Up	0.102742
GO_MF_DR_RECEPTOR_SIGNALING_PROTEIN_ACTIVITY	9	Down	0.104278
GO_BP_DR_STRIATED_MUSCLE_DEVELOPMENT	8	Down	0.104498
GO_BP_DR_RESPIRATORY_ELECTRON_TRANSPORT_CHAIN	6	Up	0.104791
GO_BP_DR_AXON_GUIDANCE	13	Down	0.106514
GO_BP_DR_MORPHOGENESIS	20	Up	0.107197
GO_BP_DR_NEURON_MIGRATION	11	Down	0.107998
GO_CC_DR_PEROXISOME	11	Up	0.108054
GO_BP_DR_NEGATIVE_REGULATION_APOPTOTIC_PROCESS	22	Up	0.108669
GO_BP_DR_STEROID_BIOSYNTHETIC_PROCESS	9	Up	0.108816
GO_MF_DR_STRUCTURAL_MOLECULE_ACTIVITY	55	Up	0.109331
GO_MF_DR_MOTOR_ACTIVITY	33	Down	0.110285
GO_MF_DR_CALCIUM_ION_BINDING	220	Down	0.110719
GO_BP_DR_PROTEIN_POLYMERIZATION	13	Down	0.110973
GO_BP_DR_GLYCOGEN_BIOSYNTHETIC_PROCESS	6	Up	0.111098
GO_BP_DR_RESPONSE_TO_COPPER_ION	6	Up	0.113244
GO_MF_DR_COENZYME_BINDING	30	Up	0.113785
GO_CC_DR_PROTEIN_COMPLEX	15	Down	0.114741
GO_MF_DR_PHOSPHATIDYLINOSITOL_BINDING	40	Down	0.116199
GO_BP_DR_EMBRYONIC_RETINA_MORPHOGENESIS_IN_CAMERA-TYPE_EYE	11	Down	0.120165
GO_BP_DR_VESICLE-MEDIATED_TRANSPORT	94	Up	0.121115
GO_BP_DR_PROTON_TRANSPORT	43	Up	0.121298
GO_MF_DR_ANTIPORTER_ACTIVITY	6	Down	0.121856
GO_MF_DR_INSULIN_RECEPTOR_BINDING	6	Down	0.123368
GO_CC_DR_MYOSIN_COMPLEX	32	Down	0.123834
GO_BP_DR_REGULATION_CYCLIN-DEPENDENT_PROTEIN_KINASE_ACTIVITY	15	Up	0.123886
GO_BP_DR_NUCLEAR-TRANSCRIBED_MRNA_CATABOLIC_PROCESS_NONSENSE-MEDIATED_DECAY	9	Up	0.125403
GO_MF_DR_SEQUENCE-SPECIFIC_DNA_BINDING_TRANSCRIPTION_FACTOR_ACTIVITY	255	Down	0.125683
GO_BP_DR_CONVERGENT_EXTENSION_GASTRULATION	34	Down	0.126905
GO_MF_DR_IRON_ION_BINDING	43	Up	0.128298
GO_BP_DR_CARTILAGE_DEVELOPMENT	34	Down	0.128551
GO_MF_DR_DAMAGED_DNA_BINDING	22	Down	0.129743
GO_BP_DR_MICROTUBULE-BASED_MOVEMENT	49	Down	0.13001
GO_BP_DR_REGULATION_RAB_GTPASE_ACTIVITY	34	Down	0.130818
GO_MF_DR_RAB_GTPASE_ACTIVATOR_ACTIVITY	34	Down	0.130818
GO_MF_DR_LIGASE_ACTIVITY	93	Up	0.13129
GO_MF_DR_LIGAND-ACTIVATED_SEQUENCE-SPECIFIC_DNA_BINDING_RNA_POLYMERASE_II_TRANSCRIPTION_FACTOR_ACTIVITY	11	Up	0.132262
GO_MF_DR_PHOSPHATASE_ACTIVITY	78	Down	0.133089
GO_BP_DR_CELLULAR_PROTEIN_METABOLIC_PROCESS	13	Down	0.133757
GO_MF_DR_GUANYL_NUCLEOTIDE_BINDING	30	Up	0.133877
GO_MF_DR_GALACTOSYLTRANSFERASE_ACTIVITY	9	Down	0.138349
GO_BP_DR_SMALL_GTPASE_MEDIATED_SIGNAL_TRANSDUCTION	156	Up	0.138755
GO_CC_DR_MICROTUBULE_BASAL_BODY	7	Up	0.139381
GO_BP_DR_PEPTIDYL-LYSINE_METHYLATION	13	Down	0.139579
GO_BP_DR_CHROMATIN_MODIFICATION	29	Down	0.14539
GO_MF_DR_NADH_DEHYDROGENASE_UBIQUINONE_ACTIVITY	19	Up	0.145494
GO_BP_DR_HINDBRAIN_DEVELOPMENT	13	Down	0.146683
GO_CC_DR_INTEGRIN_COMPLEX	13	Down	0.147275
GO_BP_DR_INTEGRIN-MEDIATED_SIGNALING_PATHWAY	19	Down	0.148178
GO_BP_DR_MRNA_TRANSPORT	10	Up	0.148611
GO_BP_DR_POSITIVE_REGULATION_APOPTOTIC_PROCESS	21	Up	0.15278
GO_BP_DR_CARBOHYDRATE_PHOSPHORYLATION	6	Down	0.154077
GO_CC_DR_LYSOSOME	17	Up	0.154141
GO_BP_DR_KUPFFERS_VESICLE_DEVELOPMENT	18	Down	0.156327
GO_BP_DR_GLYCINE_CATABOLIC_PROCESS	7	Up	0.158684
GO_MF_DR_HELICASE_ACTIVITY	93	Down	0.158954
GO_BP_DR_INTRACELLULAR_PROTEIN_KINASE_CASCADE	9	Down	0.162275
GO_BP_DR_CALCIUM_ION_TRANSMEMBRANE_TRANSPORT	21	Down	0.162816
GO_CC_DR_PROTON-TRANSPORTING_V-TYPE_ATPASE_V1_DOMAIN	7	Up	0.163093
GO_CC_DR_NUCLEOSOME	24	Down	0.16314
GO_CC_DR_INTEGRAL_TO_GOLGI_MEMBRANE	14	Down	0.164955
GO_BP_DR_TRANSCRIPTION_FROM_RNA_POLYMERASE_II_PROMOTER	7	Up	0.165251
GO_CC_DR_PCG_PROTEIN_COMPLEX	6	Down	0.165312
GO_BP_DR_ER_TO_GOLGI_VESICLE-MEDIATED_TRANSPORT	7	Up	0.166285
GO_BP_DR_CELLULAR_PROTEIN_MODIFICATION_PROCESS	55	Up	0.173288
GO_BP_DR_GLUTATHIONE_BIOSYNTHETIC_PROCESS	7	Up	0.173391
GO_BP_DR_NEURAL_TUBE_FORMATION	6	Up	0.175069
GO_MF_DR_SULFURIC_ESTER_HYDROLASE_ACTIVITY	12	Down	0.175622
GO_MF_DR_SULFOTRANSFERASE_ACTIVITY	14	Down	0.176402
GO_MF_DR_INTRAMOLECULAR_TRANSFERASE_ACTIVITY_PHOSPHOTRANSFERASES	6	Up	0.177008
GO_BP_DR_EMBRYONIC_HEMOPOIESIS	8	Up	0.18164
GO_CC_DR_PLASMA_MEMBRANE	119	Down	0.182955
GO_BP_DR_UBIQUITIN-DEPENDENT_PROTEIN_CATABOLIC_PROCESS	72	Down	0.183144
GO_MF_DR_NAD_BINDING2	28	Up	0.185789
GO_MF_DR_NUCLEIC_ACID_BINDING	698	Down	0.18952
GO_MF_DR_CATION_BINDING	26	Up	0.190422
GO_BP_DR_NEUROPEPTIDE_SIGNALING_PATHWAY	9	Down	0.192897
GO_BP_DR_PROTEOGLYCAN_BIOSYNTHETIC_PROCESS	7	Down	0.205217
GO_CC_DR_SYNAPSE	14	Down	0.207557
GO_CC_DR_SPLICEOSOMAL_COMPLEX	16	Up	0.207628
GO_MF_DR_ATPASE_ACTIVITY_COUPLED_TO_TRANSMEMBRANE_MOVEMENT_SUBSTANCES	23	Down	0.209037
GO_BP_DR_MUSCLE_ORGAN_DEVELOPMENT	10	Down	0.209537
GO_CC_DR_FLAGELLUM	6	Down	0.211896
GO_BP_DR_CYTOKINESIS	6	Down	0.213651
GO_BP_DR_REGULATION_PROLIFERATION	6	Up	0.214024
GO_BP_DR_MIGRATION	8	Up	0.21403
GO_BP_DR_MAPK_CASCADE	12	Down	0.214657
GO_MF_DR_MAP_KINASE_ACTIVITY	12	Down	0.214657
GO_BP_DR_PROTEIN_KINASE_C-ACTIVATING_G-PROTEIN_COUPLED_RECEPTOR_SIGNALING_PATHWAY	9	Down	0.21517
GO_MF_DR_DIACYLGLYCEROL_KINASE_ACTIVITY	9	Down	0.21517
GO_MF_DR_L-ASCORBIC_ACID_BINDING	7	Down	0.217617
GO_MF_DR_RECEPTOR_BINDING	18	Up	0.21996
GO_BP_DR_POSITIVE_REGULATION_RAB_GTPASE_ACTIVITY	21	Down	0.222826
GO_CC_DR_MEDIATOR_COMPLEX	16	Down	0.223441
GO_MF_DR_UBIQUITIN_BINDING	7	Down	0.223534
GO_BP_DR_PHOTOSYNTHESIS	6	Down	0.227063
GO_BP_DR_CHLOROPHYLL_BIOSYNTHETIC_PROCESS	6	Down	0.227063
GO_MF_DR_MAGNESIUM_CHELATASE_ACTIVITY	6	Down	0.227063
GO_CC_DR_GOLGI_MEMBRANE	33	Up	0.230872
GO_MF_DR_HISTONE-LYSINE_N-METHYLTRANSFERASE_ACTIVITY	17	Down	0.231034
GO_BP_DR_CELLULAR_AMINO_ACID_BIOSYNTHETIC_PROCESS	7	Down	0.232182
GO_BP_DR_NEGATIVE_REGULATION_ENDOPEPTIDASE_ACTIVITY	27	Down	0.234134
GO_CC_DR_OUTER_MEMBRANE-BOUNDED_PERIPLASMIC_SPACE	9	Down	0.236446
GO_MF_DR_IONOTROPIC_GLUTAMATE_RECEPTOR_ACTIVITY	9	Down	0.236446
GO_MF_DR_EXTRACELLULAR-GLUTAMATE-GATED_ION_CHANNEL_ACTIVITY	9	Down	0.236446
GO_MF_DR_NUCLEIC_ACID_BINDING_TRANSCRIPTION_FACTOR_ACTIVITY	6	Up	0.239198
GO_BP_DR_DOUBLE-STRAND_BREAK_REPAIR	6	Up	0.242631
GO_CC_DR_SPINDLE	10	Down	0.244403
GO_BP_DR_PROTEIN_PEPTIDYL-PROLYL_ISOMERIZATION	15	Up	0.246519
GO_BP_DR_LIPID_CATABOLIC_PROCESS	9	Down	0.248122
GO_MF_DR_NADP_BINDING2	11	Up	0.24919
GO_BP_DR_SPROUTING_ANGIOGENESIS	16	Down	0.250757
GO_CC_DR_P_GRANULE	8	Up	0.251276
GO_MF_DR_G-PROTEIN_COUPLED_RECEPTOR_ACTIVITY	39	Down	0.25199
GO_CC_DR_NUCLEAR_ENVELOPE	8	Down	0.25307
GO_CC_DR_DYNEIN_COMPLEX	8	Down	0.261387
GO_MF_DR_TRANSMEMBRANE_RECEPTOR_PROTEIN_SERINE_THREONINE_KINASE_ACTIVITY	8	Up	0.265271
GO_BP_DR_HEART_CONTRACTION	12	Down	0.265943
GO_CC_DR_MITOCHONDRIAL_ENVELOPE	6	Up	0.267053
GO_BP_DR_UMP_BIOSYNTHETIC_PROCESS	7	Up	0.268244
GO_MF_DR_DOUBLE-STRANDED_DNA_BINDING	20	Up	0.269607
GO_CC_DR_APICAL_PLASMA_MEMBRANE	6	Up	0.271124
GO_MF_DR_OXIDOREDUCTASE_PAIRED_DONORS_MOLECULAR_OXYGEN_2-OXOGLUTARATE_ONE_ATOM_EACH_OXYGEN_BOTH_DONORS	18	Down	0.271793
GO_BP_DR_FROM_RNA_POLYMERASE_II_PROMOTER	46	Down	0.273214
GO_BP_DR_EMBRYONIC_HEART_TUBE_MORPHOGENESIS	10	Up	0.274061
GO_MF_DR_SIGNAL_TRANSDUCER_ACTIVITY	106	Down	0.275074
GO_BP_DR_INTRAHEPATIC_BILE_DUCT_DEVELOPMENT	6	Down	0.277233
GO_MF_DR_TRANSITION_METAL_ION_BINDING	10	Down	0.278886
GO_MF_DR_CYSTEINE-TYPE_ENDOPEPTIDASE_INHIBITOR_ACTIVITY	6	Up	0.278994
GO_BP_DR_RNA_METABOLIC_PROCESS	16	Up	0.280487
GO_CC_DR_MITOCHONDRIAL_MEMBRANE	10	Up	0.281932
GO_BP_DR_HISTONE_LYSINE_METHYLATION	15	Down	0.283316
GO_BP_DR_SKELETAL_MUSCLE_TISSUE_DEVELOPMENT	7	Down	0.283751
GO_MF_DR_OXIDOREDUCTASE_PAIRED_DONORS_MOLECULAR_OXYGEN_REDUCED_FLAVIN_OR_FLAVOPROTEIN_ONE_ATOM_OXYGEN	7	Up	0.284241
GO_BP_DR_HEMOPOIETIC_STEM_DIFFERENTIATION	6	Down	0.284716
GO_BP_DR_REGULATION_SEQUENCE-SPECIFIC_DNA_BINDING_TRANSCRIPTION_FACTOR_ACTIVITY	17	Up	0.284927
GO_BP_DR_ZINC_ION_TRANSPORT	8	Up	0.285543
GO_BP_DR_ZINC_ION_TRANSMEMBRANE_TRANSPORT	8	Up	0.285543
GO_MF_DR_ZINC_ION_TRANSMEMBRANE_TRANSPORTER_ACTIVITY	8	Up	0.285543
GO_CC_DR_MHC_CLASS_I_PROTEIN_COMPLEX	7	Up	0.285789
GO_MF_DR_BINDING	266	Down	0.286152
GO_MF_DR_PEROXIREDOXIN_ACTIVITY	6	Up	0.28647
GO_BP_DR_DORSAL_CONVERGENCE	8	Up	0.286512
GO_BP_DR_CELL-SIGNALING	6	Down	0.286594
GO_BP_DR_CHROMOSOME_CONDENSATION	7	Down	0.286616
GO_MF_DR_PROTEIN_TRANSPORTER_ACTIVITY	36	Up	0.289896
GO_CC_DR_KINETOCHORE	9	Up	0.289999
GO_MF_DR_SMALL_GTPASE_REGULATOR_ACTIVITY	15	Down	0.291612
GO_BP_DR_CARBOHYDRATE_TRANSPORT	11	Up	0.293122
GO_BP_DR_DORSAL_VENTRAL_PATTERN_FORMATION	34	Down	0.295273
GO_MF_DR_35-CYCLIC-NUCLEOTIDE_PHOSPHODIESTERASE_ACTIVITY	10	Down	0.295391
GO_BP_DR_PROTEIN_GLYCOSYLATION	29	Down	0.297516
GO_BP_DR_NEGATIVE_REGULATION_CANONICAL_WNT_RECEPTOR_SIGNALING_PATHWAY	6	Up	0.299095
GO_BP_DR_SIGNAL_TRANSDUCTION_BY_PHOSPHORYLATION	19	Down	0.300373
GO_MF_DR_HYDROLASE_ACTIVITY_ACTING_ON_ACID_ANHYDRIDES_CATALYZING_TRANSMEMBRANE_MOVEMENT_SUBSTANCES	30	Up	0.301105
GO_MF_DR_RNA_POLYMERASE_II_TRANSCRIPTION_COFACTOR_ACTIVITY	15	Down	0.301307
GO_BP_DR_BIOSYNTHETIC_PROCESS	46	Up	0.303349
GO_BP_DR_COENZYME_A_BIOSYNTHETIC_PROCESS	6	Down	0.304733
GO_MF_DR_ISOMERASE_ACTIVITY	40	Up	0.305194
GO_MF_DR_UNFOLDED_PROTEIN_BINDING	56	Up	0.305668
GO_BP_DR_METAL_ION_TRANSPORT	9	Up	0.30689
GO_BP_DR_MICROTUBULE_CYTOSKELETON_ORGANIZATION	10	Down	0.307394
GO_BP_DR_PHOSPHOLIPID_BIOSYNTHETIC_PROCESS	10	Up	0.307895
GO_BP_DR_PROTEIN_FOLDING	84	Up	0.309964
GO_BP_DR_ATP_METABOLIC_PROCESS	8	Up	0.309978
GO_MF_DR_MICROTUBULE_MOTOR_ACTIVITY	39	Down	0.310422
GO_BP_DR_PROTEIN_DEACETYLATION	8	Up	0.311432
GO_MF_DR_GTPASE_REGULATOR_ACTIVITY	6	Up	0.311781
GO_BP_DR_PROTEIN_AUTOPHOSPHORYLATION	10	Down	0.312151
GO_MF_DR_HYDROLASE_ACTIVITY_HYDROLYZING_O-GLYCOSYL_COMPOUNDS	28	Up	0.312912
GO_MF_DR_AMINOPEPTIDASE_ACTIVITY	13	Up	0.320671
GO_CC_DR_PREFOLDIN_COMPLEX	9	Down	0.322547
GO_MF_DR_SELENIUM_BINDING	9	Up	0.323659
GO_MF_DR_UBIQUITIN_THIOLESTERASE_ACTIVITY	48	Down	0.325225
GO_MF_DR_3-BETA-HYDROXY-DELTA5-STEROID_DEHYDROGENASE_ACTIVITY	6	Up	0.329957
GO_BP_DR_CARTILAGE_MORPHOGENESIS	7	Down	0.332875
GO_MF_DR_OXIDOREDUCTASE_ACTIVITY_ACTING_ON_CH-OH_GROUP_DONORS	8	Up	0.333306
GO_BP_DR_REGULATION_PHOSPHORYLATION	8	Down	0.335062
GO_MF_DR_HYDROGEN_ION_TRANSMEMBRANE_TRANSPORTER_ACTIVITY	17	Up	0.33522
GO_BP_DR_GERM_MIGRATION	6	Down	0.337907
GO_MF_DR_TRANSFERASE_ACTIVITY_TRANSFERRING_ACYL_GROUPS	38	Up	0.341079
GO_BP_DR_CALCIUM_ION_TRANSPORT	19	Down	0.341159
GO_MF_DR_IRON-SULFUR_CLUSTER_BINDING	29	Up	0.34116
GO_MF_DR_METALLOPEPTIDASE_ACTIVITY	32	Up	0.343755
GO_BP_DR_POSITIVE_DNA-DEPENDENT	35	Up	0.344787
GO_BP_DR_RETINA_LAYER_FORMATION	13	Down	0.345827
GO_BP_DR_POSITIVE_REGULATION_FIBROBLAST_GROWTH_FACTOR_RECEPTOR_SIGNALING_PATHWAY	6	Up	0.347816
GO_BP_DR_REGULATION_SIGNAL_TRANSDUCTION	10	Up	0.349455
GO_MF_DR_OXIDOREDUCTASE_PAIRED_DONORS_MOLECULAR_OXYGEN	25	Up	0.349499
GO_CC_DR_GOLGI_APPARATUS	76	Up	0.349739
GO_BP_DR_DEPHOSPHORYLATION	105	Down	0.350829
GO_BP_DR_IONOTROPIC_GLUTAMATE_RECEPTOR_SIGNALING_PATHWAY	8	Down	0.351682
GO_BP_DR_EPHRIN_RECEPTOR_SIGNALING_PATHWAY	11	Down	0.352677
GO_BP_DR_EYE_PHOTORECEPTOR_DEVELOPMENT	9	Up	0.353834
GO_MF_DR_SINGLE-STRANDED_DNA_BINDING	13	Down	0.354194
GO_CC_DR_CYTOPLASMIC_MRNA_PROCESSING_BODY	6	Down	0.355585
GO_MF_DR_VOLTAGE-GATED_CHLORIDE_CHANNEL_ACTIVITY	9	Up	0.356937
GO_MF_DR_DNA-DIRECTED_DNA_POLYMERASE_ACTIVITY	15	Down	0.359255
GO_BP_DR_DETERMINATION_HEART_LEFT_RIGHT_ASYMMETRY	6	Down	0.359938
GO_MF_DR_HYDROLASE_ACTIVITY	438	Up	0.361807
GO_CC_DR_PROTEASOME_COMPLEX	33	Up	0.364667
GO_BP_DR_PHOSPHATIDYLINOSITOL-MEDIATED_SIGNALING	7	Down	0.367201
GO_MF_DR_TRANSFERASE_ACTIVITY_TRANSFERRING_HEXOSYL_GROUPS	25	Down	0.367747
GO_CC_DR_PROTON-TRANSPORTING_TWO-SECTOR_ATPASE_COMPLEX_PROTON-TRANSPORTING_DOMAIN	8	Up	0.370511
GO_CC_DR_NUCLEOLUS	44	Up	0.372699
GO_CC_DR_MICROTUBULE_ORGANIZING_CENTER	15	Up	0.372734
GO_MF_DR_ASPARTIC-TYPE_ENDOPEPTIDASE_ACTIVITY	8	Up	0.373136
GO_MF_DR_N-ACETYLTRANSFERASE_ACTIVITY	13	Up	0.373429
GO_BP_DR_PROTEIN_IMPORT_MITOCHONDRIAL_INNER_MEMBRANE	6	Up	0.374682
GO_CC_DR_MITOCHONDRIAL_INTERMEMBRANE_SPACE_PROTEIN_TRANSPORTER_COMPLEX	6	Up	0.374682
GO_BP_DR_NEGATIVE_REGULATION_CYSTEINE-TYPE_ENDOPEPTIDASE_APOPTOTIC_PROCESS	6	Up	0.377509
GO_MF_DR_FMN_BINDING	8	Up	0.378169
GO_MF_DR_MONOOXYGENASE_ACTIVITY	26	Up	0.37863
GO_MF_DR_FLAVIN_ADENINE_DINUCLEOTIDE_BINDING	37	Down	0.379432
GO_MF_DR_TRANSAMINASE_ACTIVITY	10	Up	0.379747
GO_BP_DR_REGULATION_RHO_PROTEIN_SIGNAL_TRANSDUCTION	54	Down	0.380393
GO_MF_DR_RHO_GUANYL-NUCLEOTIDE_EXCHANGE_FACTOR_ACTIVITY	54	Down	0.380393
GO_MF_DR_ACYL-COA_DEHYDROGENASE_ACTIVITY	13	Down	0.380449
GO_BP_DR_CILIUM_ASSEMBLY	20	Down	0.38056
GO_BP_DR_REGULATION_TRANSLATION	13	Up	0.38605
GO_BP_DR_FERROUS_IRON_TRANSPORT	17	Up	0.388041
GO_MF_DR_FERROUS_IRON_TRANSMEMBRANE_TRANSPORTER_ACTIVITY	17	Up	0.388041
GO_MF_DR_TRANSCRIPTION_REGULATORY_REGION_DNA_BINDING	10	Down	0.388041
GO_BP_DR_MELANOCYTE_DIFFERENTIATION	9	Down	0.38863
GO_MF_DR_SOLUTEHYDROGEN_ANTIPORTER_ACTIVITY	7	Down	0.391648
GO_BP_DR_NEURON_DIFFERENTIATION	8	Down	0.391726
GO_BP_DR_LIPID_TRANSPORT	20	Up	0.392797
GO_BP_DR_POSITIVE_REGULATION_I-KAPPAB_KINASE_NF-KAPPAB_CASCADE	7	Down	0.397786
GO_MF_DR_ACTIN_FILAMENT_BINDING	10	Down	0.398185
GO_BP_DR_AXON_EXTENSION_DEVELOPMENT	7	Down	0.400051
GO_BP_DR_G-PROTEIN_COUPLED_RECEPTOR_SIGNALING_PATHWAY	80	Up	0.401333
GO_BP_DR_NUCLEOSOME_ASSEMBLY	29	Down	0.404347
GO_MF_DR_SIALYLTRANSFERASE_ACTIVITY	10	Down	0.404896
GO_BP_DR_ATP_BIOSYNTHETIC_PROCESS	17	Up	0.405469
GO_MF_DR_CHROMATIN_BINDING	18	Down	0.407387
GO_BP_DR_INTRACELLULAR_RECEPTOR_MEDIATED_SIGNALING_PATHWAY	13	Up	0.408953
GO_BP_DR_NEURAL_CREST_MIGRATION	18	Down	0.410515
GO_BP_DR_CELLULAR_PROCESS	7	Down	0.410763
GO_CC_DR_PERINUCLEAR_REGION_CYTOPLASM	17	Up	0.413068
GO_BP_DR_FIN_REGENERATION	18	Down	0.41327
GO_BP_DR_CELL-ADHESION	8	Down	0.414881
GO_BP_DR_MITOSIS	35	Up	0.41859
GO_MF_DR_GLUTATHIONE_TRANSFERASE_ACTIVITY	6	Up	0.420286
GO_CC_DR_EXTRINSIC_TO_MEMBRANE	10	Down	0.420755
GO_MF_DR_RNA_POLYMERASE_II_DISTAL_ENHANCER_SEQUENCE-SPECIFIC_DNA_BINDING_TRANSCRIPTION_FACTOR_ACTIVITY	17	Up	0.423485
GO_MF_DR_DNA_BINDING_BENDING	17	Up	0.423485
GO_CC_DR_GOLGI_CISTERNA_MEMBRANE	7	Down	0.424081
GO_MF_DR_AMINO_ACID_TRANSMEMBRANE_TRANSPORTER_ACTIVITY	8	Up	0.424986
GO_MF_DR_COFACTOR_BINDING	12	Up	0.426476
GO_BP_DR_BRAIN_DEVELOPMENT	31	Down	0.427375
GO_CC_DR_RIBOSOME	134	Down	0.428863
GO_MF_DR_DOUBLE-STRANDED_RNA_BINDING	18	Up	0.428953
GO_BP_DR_DNA_METHYLATION	8	Down	0.432841
GO_BP_DR_MESODERMAL_MIGRATION	7	Up	0.432954
GO_MF_DR_TRANSFERASE_ACTIVITY_TRANSFERRING_ACYL_GROUPS_OTHER_THAN_AMINO-ACYL_GROUPS	30	Up	0.433313
GO_MF_DR_ADENYLATE_CYCLASE_ACTIVITY	6	Down	0.435615
GO_MF_DR_ADENOSINE_DEAMINASE_ACTIVITY	6	Up	0.435771
GO_BP_DR_ACTIN_CYTOSKELETON_ORGANIZATION	22	Down	0.436122
GO_BP_DR_NUCLEOTIDE_PHOSPHORYLATION	6	Up	0.43972
GO_BP_DR_GLUCOSE_METABOLIC_PROCESS	6	Up	0.44666
GO_BP_DR_MYOFIBRIL_ASSEMBLY	6	Down	0.447678
GO_BP_DR_RESPONSE_TO_DNA_DAMAGE_STIMULUS	33	Up	0.450574
GO_MF_DR_ENDOPEPTIDASE_INHIBITOR_ACTIVITY	8	Up	0.450782
GO_BP_DR_PROTEASOMAL_UBIQUITIN-DEPENDENT_PROTEIN_CATABOLIC_PROCESS	10	Up	0.452347
GO_BP_DR_CELLULAR_COMPONENT_ORGANIZATION	10	Down	0.454057
GO_BP_DR_LIVER_DEVELOPMENT	23	Down	0.454844
GO_BP_DR_NUCLEOBASE-CONTAINING_COMPOUND_METABOLIC_PROCESS	26	Down	0.457004
GO_MF_DR_METHYLTRANSFERASE_ACTIVITY	97	Down	0.462734
GO_BP_DR_DETERMINATION_LEFT_RIGHT_SYMMETRY	35	Up	0.464694
GO_BP_DR_DIGESTIVE_TRACT_DEVELOPMENT	14	Up	0.465732
GO_CC_DR_CULLIN-RING_UBIQUITIN_LIGASE_COMPLEX	7	Down	0.467107
GO_MF_DR_UBIQUITIN_PROTEIN_LIGASE_BINDING	7	Down	0.467107
GO_MF_DR_3-HYDROXYACYL-COA_DEHYDROGENASE_ACTIVITY	6	Up	0.467634
GO_BP_DR_RETINOIC_ACID_RECEPTOR_SIGNALING_PATHWAY	7	Down	0.469652
GO_BP_DR_DNA_RECOMBINATION	32	Up	0.471585
GO_MF_DR_GTPASE_BINDING	9	Up	0.473972
GO_BP_DR_IRON-SULFUR_CLUSTER_ASSEMBLY	8	Up	0.474051
GO_MF_DR_PROTEIN_DOMAIN_SPECIFIC_BINDING	19	Down	0.4751
GO_BP_DR_PROTEIN_UBIQUITINATION_UBIQUITIN-DEPENDENT_PROTEIN_CATABOLIC_PROCESS	10	Up	0.47558
GO_BP_DR_RESPONSE_TO_BACTERIUM	6	Up	0.479151
GO_MF_DR_GROWTH_FACTOR_ACTIVITY	15	Up	0.482367
GO_MF_DR_VOLTAGE-GATED_ION_CHANNEL_ACTIVITY	8	Down	0.483543
GO_MF_DR_ACID_PHOSPHATASE_ACTIVITY	9	Down	0.484343
GO_MF_DR_CYSTEINE-TYPE_ENDOPEPTIDASE_ACTIVITY	19	Down	0.48474
GO_CC_DR_EUKARYOTIC_TRANSLATION_INITIATION_FACTOR_3_COMPLEX	6	Down	0.485235
GO_BP_DR_TRNA_PROCESSING	28	Down	0.485838
GO_BP_DR_REGULATION_ARF_GTPASE_ACTIVITY	20	Down	0.486447
GO_MF_DR_ARF_GTPASE_ACTIVATOR_ACTIVITY	20	Down	0.486447
GO_BP_DR_REGULATION_APOPTOTIC_PROCESS	30	Down	0.490606
GO_CC_DR_RIBONUCLEOPROTEIN_COMPLEX	100	Up	0.49289
GO_MF_DR_ENDONUCLEASE_ACTIVITY	20	Up	0.493802
GO_MF_DR_FOUR-WAY_JUNCTION_HELICASE_ACTIVITY	15	Up	0.493879
GO_MF_DR_TRANSFORMING_GROWTH_FACTOR_BETA-ACTIVATED_RECEPTOR_ACTIVITY	7	Up	0.496208
GO_MF_DR_IDENTICAL_PROTEIN_BINDING	13	Down	0.496319
GO_MF_DR_OXIDOREDUCTASE_SINGLE_DONORS_MOLECULAR_OXYGEN_INCORPORATION_TWO_ATOMS_OXYGEN	15	Down	0.499971
GO_CC_DR_ANAPHASE-PROMOTING_COMPLEX	7	Up	0.500054
GO_MF_DR_PDZ_DOMAIN_BINDING	10	Down	0.500289
GO_BP_DR_PIGMENT_GRANULE_AGGREGATION_IN_CENTER	6	Down	0.502458
GO_CC_DR_SPINDLE_POLE	6	Down	0.504656
GO_MF_DR_OMEGA_PEPTIDASE_ACTIVITY	7	Up	0.507776
GO_CC_DR_AXON	7	Down	0.511257
GO_BP_DR_REGULATION_ANION_TRANSPORT	13	Up	0.513372
GO_MF_DR_SEQUENCE-SPECIFIC_DNA_BINDING	203	Down	0.513941
GO_BP_DR_CELLULAR_AMINO_ACID_METABOLIC_PROCESS	19	Up	0.517819
GO_CC_DR_PROTON-TRANSPORTING_TWO-SECTOR_ATPASE_COMPLEX_CATALYTIC_DOMAIN	7	Up	0.51782
GO_MF_DR_HYDROLASE_ACTIVITY_ACTING_ON_ESTER_BONDS	29	Up	0.518648
GO_MF_DR_ATP-DEPENDENT_HELICASE_ACTIVITY	67	Down	0.519549
GO_BP_DR_MICROTUBULE-BASED_PROCESS	17	Down	0.520531
GO_MF_DR_PHOSPHOPROTEIN_PHOSPHATASE_ACTIVITY	58	Down	0.522404
GO_CC_DR_LARGE_RIBOSOMAL_SUBUNIT	8	Up	0.525622
GO_MF_DR_RNA_METHYLTRANSFERASE_ACTIVITY	7	Down	0.52785
GO_CC_DR_ENDOSOME_MEMBRANE	6	Up	0.528172
GO_MF_DR_G-PROTEIN_COUPLED_RECEPTOR_BINDING	6	Up	0.529658
GO_BP_DR_POSITIVE_REGULATION_GTPASE_ACTIVITY	35	Down	0.530676
GO_MF_DR_HEAT_SHOCK_PROTEIN_BINDING	43	Up	0.531414
GO_CC_DR_INTRINSIC_TO_ENDOPLASMIC_RETICULUM_MEMBRANE	9	Up	0.531813
GO_MF_DR_EPHRIN_RECEPTOR_ACTIVITY	10	Down	0.533352
GO_MF_DR_ACTIN_BINDING	92	Down	0.534588
GO_BP_DR_TRANSCRIPTION_INITIATION_FROM_RNA_POLYMERASE_II_PROMOTER	9	Down	0.534809
GO_MF_DR_MICROTUBULE_BINDING	19	Up	0.535645
GO_MF_DR_STRUCTURAL_CONSTITUENT_RIBOSOME	111	Down	0.537578
GO_MF_DR_OXIDOREDUCTASE_ACTIVITY_ACTING_ON_NADH_OR_NADPH	9	Up	0.54119
GO_BP_DR_VASCULOGENESIS	17	Down	0.541273
GO_BP_DR_DNA_TOPOLOGICAL_CHANGE	11	Down	0.543014
GO_BP_DR_LIPID_METABOLIC_PROCESS	54	Down	0.543481
GO_BP_DR_DNA-DEPENDENT_DNA_REPLICATION_INITIATION	6	Down	0.545474
GO_BP_DR_VACUOLAR_TRANSPORT	8	Down	0.547183
GO_MF_DR_METAL_ION_BINDING	641	Down	0.547665
GO_BP_DR_PROJECTION_ORGANIZATION	10	Up	0.547683
GO_BP_DR_TRNA_AMINOACYLATION_FOR_PROTEIN_TRANSLATION	29	Up	0.548384
GO_CC_DR_CHROMOSOME	60	Down	0.549181
GO_BP_DR_ION_TRANSPORT	91	Down	0.54928
GO_MF_DR_CALCIUM-TRANSPORTING_ATPASE_ACTIVITY	8	Up	0.549461
GO_CC_DR_INTERMEDIATE_FILAMENT	11	Up	0.549705
GO_CC_DR_NUCLEAR_MEMBRANE	6	Up	0.551888
GO_BP_DR_POSITIVE_FROM_RNA_POLYMERASE_II_PROMOTER	19	Down	0.552454
GO_BP_DR_AUTOPHAGY	12	Up	0.553228
GO_CC_DR_CILIUM	18	Down	0.555538
GO_BP_DR_PURINE_NUCLEOTIDE_BIOSYNTHETIC_PROCESS	8	Up	0.555939
GO_BP_DR_RESPONSE_TO_HYPOXIA	13	Up	0.556238
GO_MF_DR_TRANSLATION_ELONGATION_FACTOR_ACTIVITY	14	Up	0.556527
GO_CC_DR_CYTOPLASMIC_VESICLE	10	Up	0.556595
GO_BP_DR_OTOLITH_DEVELOPMENT	6	Up	0.558409
GO_MF_DR_CYTOSKELETAL_ADAPTOR_ACTIVITY	12	Up	0.563043
GO_BP_DR_EMBRYONIC_PATTERN_SPECIFICATION	8	Down	0.565632
GO_BP_DR_POTASSIUM_ION_TRANSPORT	9	Up	0.567199
GO_MF_DR_NUCLEOSIDE-TRIPHOSPHATASE_ACTIVITY	101	Down	0.567675
GO_MF_DR_AMINOACYL-TRNA_LIGASE_ACTIVITY	33	Up	0.569152
GO_CC_DR_CLATHRIN_ADAPTOR_COMPLEX	19	Down	0.57118
GO_MF_DR_SYMPORTER_ACTIVITY	6	Down	0.574148
GO_MF_DR_4_IRON_4_SULFUR_CLUSTER_BINDING	13	Up	0.575276
GO_BP_DR_CARBOHYDRATE_BIOSYNTHETIC_PROCESS	6	Down	0.575691
GO_CC_DR_POSTSYNAPTIC_MEMBRANE	13	Down	0.576588
GO_MF_DR_CATION_TRANSMEMBRANE_TRANSPORTER_ACTIVITY	13	Up	0.578891
GO_MF_DR_G-PROTEIN_BETA_GAMMA-SUBUNIT_COMPLEX_BINDING	8	Up	0.579161
GO_BP_DR_KIDNEY_DEVELOPMENT	7	Down	0.58055
GO_MF_DR_PROTON-TRANSPORTING_ATPASE_ACTIVITY_ROTATIONAL_MECHANISM	10	Up	0.581965
GO_BP_DR_PROTEIN_LOCALIZATION	6	Up	0.585193
GO_MF_DR_WNT-ACTIVATED_RECEPTOR_ACTIVITY	8	Down	0.58613
GO_CC_DR_PROTEIN_PHOSPHATASE_TYPE_2A_COMPLEX	7	Down	0.587684
GO_MF_DR_PROTEIN_PHOSPHATASE_TYPE_2A_REGULATOR_ACTIVITY	7	Down	0.587684
GO_BP_DR_NUCLEOSIDE_METABOLIC_PROCESS	10	Down	0.588729
GO_MF_DR_CYSTEINE-TYPE_PEPTIDASE_ACTIVITY	57	Down	0.589351
GO_MF_DR_TRANSCRIPTION_FACTOR_BINDING	27	Up	0.589933
GO_MF_DR_SERINE-TYPE_ENDOPEPTIDASE_ACTIVITY	26	Down	0.59
GO_BP_DR_CANONICAL_WNT_RECEPTOR_SIGNALING_PATHWAY	21	Up	0.593696
GO_MF_DR_CYTOSKELETAL_PROTEIN_BINDING	14	Up	0.593995
GO_BP_DR_PECTORAL_FIN_DEVELOPMENT	8	Up	0.59704
GO_BP_DR_CATION_TRANSPORT	52	Down	0.598679
GO_BP_DR_PROTEIN_ADP-RIBOSYLATION	6	Up	0.598722
GO_BP_DR_TRANSLATIONAL_INITIATION	48	Up	0.60108
GO_CC_DR_MICROTUBULE	49	Down	0.605311
GO_BP_DR_BLOOD_VESSEL_DEVELOPMENT	13	Down	0.606837
GO_MF_DR_UBIQUITIN-SPECIFIC_PROTEASE_ACTIVITY	8	Down	0.607799
GO_MF_DR_TRANSMEMBRANE_TRANSPORTER_ACTIVITY	15	Up	0.607927
GO_MF_DR_NUCLEOTIDYLTRANSFERASE_ACTIVITY	35	Down	0.608998
GO_MF_DR_RIBONUCLEASE_ACTIVITY	6	Down	0.610178
GO_BP_DR_CENTRAL_NERVOUS_SYSTEM_DEVELOPMENT	8	Down	0.612744
GO_BP_DR_EMBRYO_DEVELOPMENT	67	Down	0.61352
GO_CC_DR_CYTOSOLIC_SMALL_RIBOSOMAL_SUBUNIT	6	Down	0.615956
GO_MF_DR_TUBULIN-TYROSINE_LIGASE_ACTIVITY	6	Down	0.618593
GO_BP_DR_NOTCH_SIGNALING_PATHWAY	25	Down	0.624692
GO_BP_DR_TAIL_MORPHOGENESIS	6	Up	0.624873
GO_BP_DR_DNA-DEPENDENT_TRANSCRIPTION_INITIATION	13	Down	0.628827
GO_MF_DR_UBIQUITIN-PROTEIN_LIGASE_ACTIVITY	61	Down	0.629132
GO_CC_DR_NUCLEOPLASM	11	Down	0.632535
GO_BP_DR_NUCLEIC_ACID_PHOSPHODIESTER_BOND_HYDROLYSIS	50	Up	0.634007
GO_MF_DR_WNT-PROTEIN_BINDING	9	Down	0.634238
GO_CC_DR_TIGHT_JUNCTION	20	Up	0.636335
GO_MF_DR_PROTEIN_DIMERIZATION_ACTIVITY	94	Up	0.637048
GO_BP_DR_CARBOHYDRATE_METABOLIC_PROCESS	99	Up	0.637146
GO_MF_DR_ANTIOXIDANT_ACTIVITY	11	Up	0.642242
GO_BP_DR_SKELETAL_SYSTEM_DEVELOPMENT	9	Up	0.643996
GO_MF_DR_PROTEIN_TYROSINE_SERINE_THREONINE_PHOSPHATASE_ACTIVITY	28	Down	0.644096
GO_MF_DR_CALCIUM-DEPENDENT_CYSTEINE-TYPE_ENDOPEPTIDASE_ACTIVITY	8	Up	0.644414
GO_BP_DR_RIBOSOME_BIOGENESIS	29	Up	0.646091
GO_MF_DR_PROTEIN_DISULFIDE_OXIDOREDUCTASE_ACTIVITY	13	Up	0.646182
GO_BP_DR_DIFFERENTIATION	37	Up	0.647571
GO_BP_DR_NERVOUS_SYSTEM_DEVELOPMENT	20	Down	0.6477
GO_BP_DR_PROTEIN_DEPHOSPHORYLATION	73	Down	0.647822
GO_BP_DR_TRNA_METHYLATION	7	Up	0.651062
GO_BP_DR_NEGATIVE_REGULATION_TRANSLATIONAL_INITIATION	6	Up	0.652067
GO_BP_DR_MIGRATION_GASTRULATION	32	Up	0.652691
GO_CC_DR_SMALL_RIBOSOMAL_SUBUNIT	8	Down	0.652906
GO_CC_DR_TRANSCRIPTION_FACTOR_COMPLEX	50	Up	0.653685
GO_CC_DR_EXTRACELLULAR_MATRIX	10	Down	0.657097
GO_BP_DR_FOREBRAIN_DEVELOPMENT	8	Down	0.657185
GO_BP_DR_RNA_PROCESSING	42	Up	0.662875
GO_MF_DR_2_IRON_2_SULFUR_CLUSTER_BINDING	11	Up	0.664639
GO_BP_DR_PRONEPHROS_DEVELOPMENT	19	Up	0.664858
GO_CC_DR_BASOLATERAL_PLASMA_MEMBRANE	7	Down	0.66634
GO_CC_DR_NUCLEAR_PORE	11	Down	0.666366
GO_MF_DR_HISTONE_ACETYLTRANSFERASE_ACTIVITY	7	Down	0.668419
GO_BP_DR_HISTONE_ACETYLATION	7	Down	0.668419
GO_BP_DR_NEUROGENESIS	7	Up	0.670254
GO_BP_DR_ONE-CARBON_METABOLIC_PROCESS	10	Up	0.670546
GO_BP_DR_NEGATIVE_REGULATION_WNT_RECEPTOR_SIGNALING_PATHWAY	10	Up	0.673898
GO_BP_DR_HEART_LOOPING	29	Up	0.67447
GO_BP_DR_NUCLEOTIDE-EXCISION_REPAIR	15	Down	0.676022
GO_MF_DR_MANNOSYL-OLIGOSACCHARIDE_12-ALPHA-MANNOSIDASE_ACTIVITY	7	Up	0.676384
GO_MF_DR_S-ADENOSYLMETHIONINE-DEPENDENT_METHYLTRANSFERASE_ACTIVITY	7	Down	0.677467
GO_MF_DR_TRANSLATION_INITIATION_FACTOR_ACTIVITY	47	Up	0.677676
GO_MF_DR_DNA-DIRECTED_RNA_POLYMERASE_ACTIVITY	23	Up	0.678256
GO_CC_DR_CENTROSOME	7	Down	0.684142
GO_MF_DR_TRANSCRIPTION_COACTIVATOR_ACTIVITY	16	Down	0.685309
GO_BP_DR_TRNA_MODIFICATION	8	Down	0.685425
GO_BP_DR_MIDBRAIN-HINDBRAIN_BOUNDARY_DEVELOPMENT	8	Down	0.686145
GO_BP_DR_TRANSFORMING_GROWTH_FACTOR_BETA_RECEPTOR_SIGNALING_PATHWAY	14	Down	0.686347
GO_BP_DR_METHYLATION	85	Down	0.686708
GO_BP_DR_CYCLIC_NUCLEOTIDE_BIOSYNTHETIC_PROCESS	14	Down	0.687265
GO_MF_DR_PHOSPHORUS-OXYGEN_LYASE_ACTIVITY	14	Down	0.687265
GO_CC_DR_PROJECTION	25	Up	0.688248
GO_BP_DR_BLOOD_VESSEL_MORPHOGENESIS	12	Down	0.690845
GO_BP_DR_DEFINITIVE_HEMOPOIESIS	6	Down	0.690914
GO_BP_DR_MELANOSOME_TRANSPORT	9	Up	0.693396
GO_MF_DR_RRNA_BINDING	9	Up	0.695305
GO_BP_DR_PROTEIN_UBIQUITINATION	54	Down	0.695498
GO_BP_DR_RNA_METHYLATION	10	Down	0.695741
GO_MF_DR_HYDROLASE_ACTIVITY_ACTING_ON_CARBON-NITROGEN_BUT_NOT_PEPTIDE_BONDS_IN_LINEAR_AMIDES	9	Up	0.699444
GO_BP_DR_PHOTOPERIODISM	7	Up	0.700954
GO_CC_DR_CORTEX	9	Down	0.701504
GO_MF_DR_NON-MEMBRANE_SPANNING_PROTEIN_TYROSINE_KINASE_ACTIVITY	8	Down	0.703347
GO_BP_DR_INDUCTION_APOPTOSIS	7	Up	0.703354
GO_BP_DR_PATTERN_SPECIFICATION_PROCESS	17	Up	0.706287
GO_MF_DR_PROTEIN_SERINE_THREONINE_PHOSPHATASE_ACTIVITY	15	Down	0.707507
GO_MF_DR_HYDROLASE_ACTIVITY_ACTING_ON_GLYCOSYL_BONDS	12	Up	0.708192
GO_CC_DR_MITOCHONDRIAL_OUTER_MEMBRANE	22	Up	0.708281
GO_BP_DR_REDOX_HOMEOSTASIS	42	Up	0.708296
GO_BP_DR_PEPTIDYL-TYROSINE_DEPHOSPHORYLATION	51	Down	0.713626
GO_CC_DR_ENDOSOME	22	Up	0.715105
GO_CC_DR_LYSOSOMAL_MEMBRANE	9	Up	0.716673
GO_BP_DR_MIDBRAIN_DEVELOPMENT	8	Up	0.717766
GO_BP_DR_PROTEIN_TARGETING_TO_MITOCHONDRION	9	Up	0.717998
GO_BP_DR_RRNA_PROCESSING	22	Up	0.719072
GO_BP_DR_PATTERNING_BLOOD_VESSELS	7	Down	0.7204
GO_BP_DR_GLYCEROL_METABOLIC_PROCESS	7	Up	0.721155
GO_MF_DR_SNAP_RECEPTOR_ACTIVITY	7	Down	0.723332
GO_MF_DR_TRANSPORTER_ACTIVITY	44	Down	0.724033
GO_BP_DR_DNA_DUPLEX_UNWINDING	10	Down	0.725399
GO_MF_DR_SH3_DOMAIN_BINDING	14	Up	0.725624
GO_BP_DR_DNA_REPAIR	87	Down	0.728983
GO_BP_DR_ANGIOGENESIS	32	Down	0.731121
GO_BP_DR_TRANSLATIONAL_ELONGATION	17	Up	0.740172
GO_BP_DR_SPERMATOGENESIS	8	Down	0.74103
GO_BP_DR_TERMINATION_G-PROTEIN_COUPLED_RECEPTOR_SIGNALING_PATHWAY	20	Down	0.742372
GO_BP_DR_GPI_ANCHOR_BIOSYNTHETIC_PROCESS	11	Up	0.742528
GO_BP_DR_DOUBLE-STRAND_BREAK_REPAIR_VIA_HOMOLOGOUS_RECOMBINATION	6	Down	0.744002
GO_BP_DR_PHOSPHATIDYLINOSITOL_METABOLIC_PROCESS	6	Down	0.745454
GO_MF_DR_PHOSPHATIDYLINOSITOL_PHOSPHATE_KINASE_ACTIVITY	6	Down	0.745454
GO_BP_DR_ATP_CATABOLIC_PROCESS	122	Down	0.751235
GO_BP_DR_INTRAFLAGELLAR_TRANSPORT	6	Down	0.754856
GO_BP_DR_MRNA_PROCESSING	59	Up	0.75765
GO_MF_DR_RHO_GTPASE_BINDING	6	Down	0.758528
GO_MF_DR_CARBOHYDRATE_BINDING	62	Down	0.759295
GO_BP_DR_CHROMOSOME_SEGREGATION	12	Up	0.760207
GO_BP_DR_DETERMINATION_VENTRAL_IDENTITY	10	Down	0.760588
GO_CC_DR_INTEGRAL_TO_ENDOPLASMIC_RETICULUM_MEMBRANE	10	Up	0.763494
GO_BP_DR_NUCLEAR_MRNA_SPLICING_VIA_SPLICEOSOME	10	Up	0.76507
GO_BP_DR_PROTEOLYSIS	206	Up	0.768239
GO_MF_DR_PROTEIN_TYROSINE_PHOSPHATASE_ACTIVITY	57	Down	0.768744
GO_BP_DR_REGULATION_ACTIN_FILAMENT_POLYMERIZATION	7	Up	0.772291
GO_BP_DR_SOMITOGENESIS	32	Up	0.779527
GO_BP_DR_PHOSPHOLIPID_TRANSPORT	12	Up	0.781728
GO_BP_DR_REGULATION_ARF_PROTEIN_SIGNAL_TRANSDUCTION	11	Down	0.788943
GO_MF_DR_ARF_GUANYL-NUCLEOTIDE_EXCHANGE_FACTOR_ACTIVITY	11	Down	0.788943
GO_BP_DR_PROLIFERATION	11	Down	0.788985
GO_CC_DR_LAMELLIPODIUM	6	Up	0.790225
GO_BP_DR_MAGNESIUM_ION_TRANSPORT	7	Down	0.790928
GO_BP_DR_ION_TRANSMEMBRANE_TRANSPORT	99	Up	0.791791
GO_MF_DR_NAD_ADP-RIBOSYLTRANSFERASE_ACTIVITY	12	Down	0.792488
GO_CC_DR_MITOCHONDRIAL_PROTON-TRANSPORTING_ATP_SYNTHASE_COMPLEX_COUPLING_FACTOR_FO	7	Down	0.793065
GO_BP_DR_MISMATCH_REPAIR	6	Down	0.793525
GO_MF_DR_MISMATCHED_DNA_BINDING	6	Down	0.793525
GO_BP_DR_GROWTH2	9	Up	0.794747
GO_BP_DR_PROTEIN_METHYLATION	15	Down	0.797186
GO_CC_DR_ACTIN_CYTOSKELETON	16	Down	0.802493
GO_BP_DR_GENE_SILENCING_BY_RNA	12	Up	0.802796
GO_CC_DR_NUCLEAR_SPECK	8	Down	0.802937
GO_CC_DR_HETEROTRIMERIC_G-PROTEIN_COMPLEX	12	Up	0.805857
GO_MF_DR_OXIDOREDUCTASE_ACTIVITY_ACTING_ON_THE_CH-CH_GROUP_DONORS	19	Up	0.807247
GO_CC_DR_KINESIN_COMPLEX	6	Down	0.808423
GO_CC_DR_Z_DISC	9	Down	0.810678
GO_BP_DR_CHLORIDE_TRANSPORT	13	Up	0.810899
GO_BP_DR_VESICLE_DOCKING_EXOCYTOSIS	8	Up	0.81121
GO_MF_DR_MAGNESIUM_ION_BINDING	68	Down	0.81131
GO_MF_DR_COPPER_ION_BINDING	12	Down	0.813658
GO_MF_DR_MAGNESIUM_ION_TRANSMEMBRANE_TRANSPORTER_ACTIVITY	6	Down	0.818698
GO_BP_DR_TISSUE_DEVELOPMENT	10	Up	0.822578
GO_MF_DR_SUGARHYDROGEN_SYMPORTER_ACTIVITY	6	Up	0.824158
GO_BP_DR_EXTRACELLULAR_POLYSACCHARIDE_BIOSYNTHETIC_PROCESS	8	Down	0.826151
GO_MF_DR_DTDP-4-DEHYDRORHAMNOSE_REDUCTASE_ACTIVITY	8	Down	0.826151
GO_MF_DR_PEPTIDASE_ACTIVITY	117	Down	0.829005
GO_MF_DR_NUCLEASE_ACTIVITY	24	Up	0.830296
GO_BP_DR_EPITHELIAL_TO_MESENCHYMAL_TRANSITION	6	Down	0.831812
GO_MF_DR_RNA_BINDING	228	Down	0.832504
GO_MF_DR_INOSITOL-145-TRISPHOSPHATE_3-KINASE_ACTIVITY	7	Down	0.83433
GO_BP_DR_TRNA_AMINOACYLATION	6	Down	0.835793
GO_MF_DR_METALLOENDOPEPTIDASE_ACTIVITY	49	Up	0.84292
GO_BP_DR_PROTEIN_CATABOLIC_PROCESS	19	Down	0.843345
GO_BP_DR_NEGATIVE_REGULATION_PROLIFERATION	6	Up	0.845195
GO_MF_DR_HYDROLASE_ACTIVITY_ACTING_ON_CARBON-NITROGEN_BUT_NOT_PEPTIDE_BONDS	8	Up	0.845992
GO_BP_DR_CELLULAR_METABOLIC_PROCESS	27	Up	0.847475
GO_MF_DR_PHOSPHOGLUCONATE_DEHYDROGENASE_DECARBOXYLATING_ACTIVITY	6	Down	0.852491
GO_CC_DR_RETROMER_COMPLEX	7	Down	0.85348
GO_MF_DR_PROTEIN_KINASE_C_ACTIVITY	9	Up	0.854332
GO_BP_DR_PHOSPHATIDYLINOSITOL_PHOSPHORYLATION	21	Up	0.856836
GO_MF_DR_CALMODULIN_BINDING	11	Down	0.856841
GO_BP_DR_SODIUM_ION_EXPORT	18	Down	0.85724
GO_BP_DR_GLYCEROL_ETHER_METABOLIC_PROCESS	7	Down	0.866289
GO_BP_DR_EXOCRINE_PANCREAS_DEVELOPMENT	12	Up	0.869522
GO_CC_DR_PROTEASOME_CORE_COMPLEX_ALPHA-SUBUNIT_COMPLEX	8	Down	0.871457
GO_MF_DR_ATP-DEPENDENT_DNA_HELICASE_ACTIVITY	8	Down	0.871634
GO_BP_DR_PROTEIN_K63-LINKED_DEUBIQUITINATION	7	Down	0.874032
GO_BP_DR_FATTY_ACID_METABOLIC_PROCESS	11	Down	0.876157
GO_MF_DR_ENDOPEPTIDASE_ACTIVITY	18	Down	0.877717
GO_BP_DR_AMINO_ACID_TRANSMEMBRANE_TRANSPORT	11	Up	0.880765
GO_BP_DR_RESPONSE_TO_IONIZING_RADIATION	6	Up	0.882197
GO_BP_DR_PENTOSE-PHOSPHATE_SHUNT	9	Up	0.88315
GO_BP_DR_EMBRYONIC_PECTORAL_FIN_MORPHOGENESIS	7	Up	0.88421
GO_BP_DR_CILIUM_MORPHOGENESIS	12	Up	0.888334
GO_BP_DR_REGULATION_ION_TRANSMEMBRANE_TRANSPORT	22	Down	0.890192
GO_MF_DR_CARBOXYLESTERASE_ACTIVITY	6	Down	0.892217
GO_BP_DR_PROTEIN_HOMOOLIGOMERIZATION	18	Up	0.892422
GO_BP_DR_LIPID_BIOSYNTHETIC_PROCESS	9	Down	0.892755
GO_MF_DR_PHOSPHOLIPID-TRANSLOCATING_ATPASE_ACTIVITY	10	Up	0.894509
GO_MF_DR_SERINE-TYPE_PEPTIDASE_ACTIVITY	22	Up	0.895127
GO_MF_DR_MRNA_BINDING	6	Up	0.895524
GO_BP_DR_WNT_RECEPTOR_SIGNALING_PATHWAY	31	Down	0.898344
GO_MF_DR_ATPASE_ACTIVITY	64	Up	0.90048
GO_MF_DR_EXTRACELLULAR_MATRIX_STRUCTURAL_CONSTITUENT	6	Down	0.900669
GO_MF_DR_HYDROGEN_ION_TRANSPORTING_ATP_SYNTHASE_ACTIVITY_ROTATIONAL_MECHANISM	11	Down	0.900789
GO_BP_DR_CELL-MATRIX_ADHESION	11	Up	0.901387
GO_MF_DR_LYASE_ACTIVITY	40	Down	0.901568
GO_MF_DR_RRNA_METHYLTRANSFERASE_ACTIVITY	6	Up	0.902348
GO_BP_DR_CYTOSKELETON_ORGANIZATION	16	Up	0.903219
GO_BP_DR_CONVERGENT_EXTENSION_AXIS_ELONGATION	13	Down	0.903266
GO_BP_DR_NEURAL_CREST_DEVELOPMENT	10	Down	0.904125
GO_BP_DR_PIGMENTATION	6	Up	0.904362
GO_BP_DR_EXTRACELLULAR_MATRIX_ORGANIZATION	6	Down	0.909011
GO_BP_DR_FATTY_ACID_BIOSYNTHETIC_PROCESS	9	Down	0.910944
GO_BP_DR_POSITIVE_REGULATION_PROLIFERATION	7	Up	0.911136
GO_BP_DR_RETINA_MORPHOGENESIS_IN_CAMERA-TYPE_EYE	9	Up	0.919515
GO_BP_DR_MEIOSIS	9	Up	0.919643
GO_BP_DR_RETINA_DEVELOPMENT_IN_CAMERA-TYPE_EYE	40	Up	0.921359
GO_BP_DR_RRNA_METHYLATION	7	Down	0.926259
GO_MF_DR_DNA_TOPOISOMERASE_TYPE_I_ACTIVITY	9	Up	0.933747
GO_CC_DR_SEPTIN_COMPLEX	8	Down	0.934355
GO_BP_DR_POTASSIUM_ION_TRANSMEMBRANE_TRANSPORT	13	Up	0.934852
GO_BP_DR_CENTRAL_NERVOUS_SYSTEM_MORPHOGENESIS	6	Down	0.936392
GO_BP_DR_PANCREAS_DEVELOPMENT	14	Down	0.938733
GO_MF_DR_GLYCEROPHOSPHODIESTER_PHOSPHODIESTERASE_ACTIVITY	6	Down	0.940754
GO_BP_DR_TRANSLATION	146	Down	0.941154
GO_BP_DR_BRAIN_MORPHOGENESIS	6	Up	0.941434
GO_CC_DR_JUNCTION	33	Up	0.941746
GO_BP_DR_ATP_SYNTHESIS_COUPLED_PROTON_TRANSPORT	17	Up	0.945617
GO_BP_DR_ENDOCYTOSIS	10	Up	0.946957
GO_MF_DR_POTASSIUM_CHANNEL_ACTIVITY	6	Down	0.948629
GO_BP_DR_GLUTAMINE_METABOLIC_PROCESS	6	Up	0.950184
GO_BP_DR_ANION_TRANSPORT	12	Down	0.951304
GO_CC_DR_CONDENSED_CHROMOSOME_KINETOCHORE	8	Up	0.954399
GO_BP_DR_HEMOPOIESIS	22	Up	0.955002
GO_BP_DR_GONAD_DEVELOPMENT	9	Up	0.959209
GO_BP_DR_SODIUM_ION_TRANSPORT	12	Down	0.961143
GO_CC_DR_COLLAGEN	12	Down	0.962232
GO_BP_DR_ISOPRENOID_BIOSYNTHETIC_PROCESS	7	Up	0.963407
GO_MF_DR_INORGANIC_ANION_EXCHANGER_ACTIVITY	6	Up	0.963978
GO_MF_DR_ANION_TRANSMEMBRANE_TRANSPORTER_ACTIVITY	6	Up	0.963978
GO_MF_DR_PROTEIN_METHYLTRANSFERASE_ACTIVITY	13	Down	0.967091
GO_MF_DR_EXONUCLEASE_ACTIVITY	16	Up	0.970106
GO_BP_DR_PROTEIN_COMPLEX_ASSEMBLY	8	Up	0.970624
GO_BP_DR_REGULATION_NEURON_APOPTOTIC_PROCESS	6	Up	0.973012
GO_MF_DR_OXIDOREDUCTASE_ACTIVITY_ACTING_ON_THE_ALDEHYDE_OR_OXO_GROUP_DONORS_NAD_OR_NADP_AS_ACCEPTOR	14	Up	0.973574
GO_BP_DR_PROTEOLYSIS_CELLULAR_PROTEIN_CATABOLIC_PROCESS	16	Down	0.979156
GO_CC_DR_PROTEASOME_CORE_COMPLEX	16	Down	0.979156
GO_MF_DR_THREONINE-TYPE_ENDOPEPTIDASE_ACTIVITY	16	Down	0.979156
GO_BP_DR_CARBOHYDRATE_TRANSMEMBRANE_TRANSPORT	7	Down	0.980727
GO_MF_DR_ATPASE_ACTIVITY_COUPLED_TO_TRANSMEMBRANE_MOVEMENT_IONS_PHOSPHORYLATIVE_MECHANISM	26	Up	0.985667
GO_BP_DR_VASCULATURE_DEVELOPMENT	11	Down	0.989803
GO_BP_DR_FILOPODIUM_ASSEMBLY	14	Up	0.990059
GO_BP_DR_AXONOGENESIS	12	Up	0.992936
GO_BP_DR_TRANSMEMBRANE_RECEPTOR_PROTEIN_SERINE_THREONINE_KINASE_SIGNALING_PATHWAY	6	Down	0.994074
GO_MF_DR_PEPTIDYL-PROLYL_CIS-TRANS_ISOMERASE_ACTIVITY	22	Up	0.994589
GO_BP_DR_ERYTHROCYTE_DIFFERENTIATION	8	Up	0.994797
GO_BP_DR_STEROID_HORMONE_MEDIATED_SIGNALING_PATHWAY	27	Up	0.99639
GO_MF_DR_STEROID_HORMONE_RECEPTOR_ACTIVITY	27	Up	0.99639
GO_MF_DR_BETA-CATENIN_BINDING	8	Up	0.998982

## Sheet: S2_8
Term	NGenes	Direction	PValue
GO_MF_DR_BINDING	266	Down	1.3682e-05
GO_BP_DR_TRANSLATION	146	Down	5.26832e-05
GO_BP_DR_PROTEIN_TRANSPORT	193	Up	5.7395e-05
GO_MF_DR_DNA_BINDING	595	Down	5.87484e-05
GO_CC_DR_RIBOSOME	134	Down	6.58798e-05
GO_MF_DR_STRUCTURAL_CONSTITUENT_RIBOSOME	111	Down	0.000133295
GO_MF_DR_PHOSPHOLIPASE_C_ACTIVITY	11	Down	0.000219204
GO_BP_DR_DNA_REPLICATION	54	Down	0.000521897
GO_CC_DR_EXTRACELLULAR_REGION	85	Up	0.000530473
GO_MF_DR_TRANSFERASE_ACTIVITY	415	Down	0.00063505
GO_MF_DR_PHOSPHATIDYLINOSITOL_PHOSPHOLIPASE_C_ACTIVITY	10	Down	0.00119809
GO_BP_DR_RESPONSE_TO_METHYLMERCURY	7	Up	0.00139851
GO_BP_DR_RESPONSE_TO_CADMIUM_ION	6	Up	0.00186681
GO_CC_DR_EXTRACELLULAR_SPACE	24	Up	0.00189897
GO_MF_DR_RECEPTOR_BINDING	18	Up	0.00197526
GO_BP_DR_CILIUM_ASSEMBLY	20	Down	0.00234441
GO_BP_DR_GASTRULATION	15	Up	0.00253686
GO_BP_DR_ENDODERM_FORMATION	8	Up	0.00319522
GO_BP_DR_BMP_SIGNALING_PATHWAY	7	Up	0.00332928
GO_BP_DR_SRP-DEPENDENT_COTRANSLATIONAL_PROTEIN_TARGETING_TO_MEMBRANE	6	Up	0.00334627
GO_MF_DR_METHYLTRANSFERASE_ACTIVITY	97	Down	0.00377057
GO_BP_DR_CYCLE_ARREST	8	Up	0.00383323
GO_BP_DR_POSITIVE_REGULATION_CYSTEINE-TYPE_ENDOPEPTIDASE_APOPTOTIC_PROCESS	7	Up	0.00446999
GO_BP_DR_EPIBOLY_GASTRULATION_WITH_MOUTH_FORMING_SECOND	16	Up	0.00474214
GO_MF_DR_HELICASE_ACTIVITY	93	Down	0.00531496
GO_BP_DR_SKELETAL_MUSCLE_FIBER_DEVELOPMENT	7	Down	0.00541321
GO_BP_DR_NUCLEAR-TRANSCRIBED_MRNA_CATABOLIC_PROCESS_NONSENSE-MEDIATED_DECAY	9	Up	0.00607823
GO_BP_DR_MRNA_TRANSPORT	10	Up	0.00616382
GO_BP_DR_POTASSIUM_ION_TRANSPORT	9	Up	0.00647542
GO_BP_DR_RNA_SPLICING	28	Up	0.0066763
GO_MF_DR_PHOSPHORIC_DIESTER_HYDROLASE_ACTIVITY	28	Down	0.00685618
GO_BP_DR_METHYLATION	85	Down	0.00695141
GO_MF_DR_PHOSPHOLIPID_BINDING	187	Down	0.00798476
GO_BP_DR_CELLULAR_PROTEIN_METABOLIC_PROCESS	13	Down	0.00960823
GO_BP_DR_GLYCOLYSIS	13	Up	0.00974899
GO_CC_DR_ENDOPLASMIC_RETICULUM	93	Up	0.011058
GO_BP_DR_NUCLEOCYTOPLASMIC_TRANSPORT	63	Up	0.0111314
GO_MF_DR_GTPASE_REGULATOR_ACTIVITY	6	Up	0.0120525
GO_MF_DR_NUCLEOSIDE-TRIPHOSPHATASE_ACTIVITY	101	Down	0.0121101
GO_MF_DR_NUCLEIC_ACID_BINDING	698	Down	0.0124614
GO_MF_DR_POTASSIUM_CHANNEL_ACTIVITY	6	Up	0.0135702
GO_BP_DR_TRANSPORT	356	Up	0.0144352
GO_MF_DR_LIGAND-ACTIVATED_SEQUENCE-SPECIFIC_DNA_BINDING_RNA_POLYMERASE_II_TRANSCRIPTION_FACTOR_ACTIVITY	11	Up	0.0147528
GO_BP_DR_POSITIVE_REGULATION_APOPTOTIC_PROCESS	21	Up	0.0169877
GO_BP_DR_RESPONSE_TO_CHEMICAL_STIMULUS	23	Up	0.0174916
GO_BP_DR_POTASSIUM_ION_TRANSMEMBRANE_TRANSPORT	13	Up	0.0188132
GO_BP_DR_GASTRULATION_WITH_MOUTH_FORMING_SECOND	9	Up	0.0211448
GO_BP_DR_NEGATIVE_REGULATION_APOPTOTIC_PROCESS	22	Up	0.0214994
GO_CC_DR_CLATHRIN_ADAPTOR_COMPLEX	19	Down	0.0228214
GO_MF_DR_GUANYL_NUCLEOTIDE_BINDING	30	Up	0.0229608
GO_BP_DR_REGULATION_TRANSLATION	13	Up	0.0230382
GO_CC_DR_PROTEINACEOUS_EXTRACELLULAR_MATRIX	11	Up	0.0238802
GO_MF_DR_PROTEIN_KINASE_BINDING	21	Up	0.0239466
GO_MF_DR_HYDROLASE_ACTIVITY_ACTING_ON_ACID_ANHYDRIDES_IN_PHOSPHORUS-CONTAINING_ANHYDRIDES	14	Down	0.0241081
GO_MF_DR_TUBULIN-TYROSINE_LIGASE_ACTIVITY	6	Down	0.0245657
GO_MF_DR_SH3_DOMAIN_BINDING	14	Up	0.0250629
GO_BP_DR_APOPTOTIC_PROCESS	37	Up	0.0259013
GO_BP_DR_IMMUNE_RESPONSE	17	Up	0.0270206
GO_BP_DR_INTRACELLULAR_RECEPTOR_MEDIATED_SIGNALING_PATHWAY	13	Up	0.0276417
GO_BP_DR_EXTRACELLULAR_POLYSACCHARIDE_BIOSYNTHETIC_PROCESS	8	Down	0.0284166
GO_MF_DR_DTDP-4-DEHYDRORHAMNOSE_REDUCTASE_ACTIVITY	8	Down	0.0284166
GO_MF_DR_GTPASE_ACTIVATOR_ACTIVITY	32	Down	0.029547
GO_BP_DR_RRNA_PROCESSING	22	Down	0.03016
GO_BP_DR_TRANSLATIONAL_ELONGATION	17	Down	0.030312
GO_MF_DR_DNA-DIRECTED_DNA_POLYMERASE_ACTIVITY	15	Down	0.0305224
GO_BP_DR_INTRACELLULAR_SIGNAL_TRANSDUCTION	129	Down	0.0312708
GO_BP_DR_MIGRATION	8	Up	0.0314186
GO_BP_DR_RESPONSE_TO_HYPOXIA	13	Up	0.0324317
GO_BP_DR_HINDBRAIN_DEVELOPMENT	13	Down	0.0340385
GO_BP_DR_GTP_CATABOLIC_PROCESS	140	Up	0.0341507
GO_BP_DR_TRANSMEMBRANE_TRANSPORT	222	Up	0.0357852
GO_MF_DR_NUCLEIC_ACID_BINDING_TRANSCRIPTION_FACTOR_ACTIVITY	6	Up	0.0358249
GO_MF_DR_SYMPORTER_ACTIVITY	6	Down	0.0359534
GO_BP_DR_PROTEOGLYCAN_BIOSYNTHETIC_PROCESS	7	Down	0.0367558
GO_BP_DR_HOMOPHILIC_ADHESION	20	Down	0.036871
GO_BP_DR_POSITIVE_REGULATION_RAB_GTPASE_ACTIVITY	21	Down	0.037004
GO_BP_DR_HEART_MORPHOGENESIS	13	Down	0.037875
GO_BP_DR_COMMUNICATION	52	Down	0.039291
GO_MF_DR_NAD_ADP-RIBOSYLTRANSFERASE_ACTIVITY	12	Down	0.039518
GO_MF_DR_GTP_BINDING	237	Up	0.039659
GO_CC_DR_ENDOPLASMIC_RETICULUM_MEMBRANE	53	Up	0.0407304
GO_BP_DR_REGULATION_RAB_GTPASE_ACTIVITY	34	Down	0.0408677
GO_MF_DR_RAB_GTPASE_ACTIVATOR_ACTIVITY	34	Down	0.0408677
GO_MF_DR_3-BETA-HYDROXY-DELTA5-STEROID_DEHYDROGENASE_ACTIVITY	6	Down	0.0411734
GO_BP_DR_STRIATED_MUSCLE_DEVELOPMENT	8	Down	0.0420416
GO_BP_DR_EMBRYONIC_RETINA_MORPHOGENESIS_IN_CAMERA-TYPE_EYE	11	Down	0.0420985
GO_MF_DR_GTPASE_ACTIVITY	169	Up	0.0431952
GO_BP_DR_REGULATION_ARF_PROTEIN_SIGNAL_TRANSDUCTION	11	Down	0.0442146
GO_MF_DR_ARF_GUANYL-NUCLEOTIDE_EXCHANGE_FACTOR_ACTIVITY	11	Down	0.0442146
GO_MF_DR_CARBOHYDRATE_BINDING	62	Up	0.0444279
GO_MF_DR_S-ADENOSYLMETHIONINE-DEPENDENT_METHYLTRANSFERASE_ACTIVITY	7	Down	0.0446103
GO_BP_DR_DIFFERENTIATION	37	Up	0.0453796
GO_BP_DR_CELLULAR_AMINO_ACID_BIOSYNTHETIC_PROCESS	7	Down	0.0454367
GO_MF_DR_WNT-ACTIVATED_RECEPTOR_ACTIVITY	8	Down	0.0469783
GO_MF_DR_GTPASE_BINDING	9	Up	0.0474491
GO_BP_DR_EMBRYONIC_VISCEROCRANIUM_MORPHOGENESIS	11	Down	0.0474866
GO_MF_DR_PDZ_DOMAIN_BINDING	10	Down	0.0477819
GO_MF_DR_MICROTUBULE_BINDING	19	Up	0.0483044
GO_BP_DR_CONVERGENT_EXTENSION	13	Down	0.0488044
GO_MF_DR_CHAPERONE_BINDING	8	Up	0.0511539
GO_BP_DR_KUPFFERS_VESICLE_DEVELOPMENT	18	Down	0.0512251
GO_MF_DR_ATPASE_ACTIVITY	64	Down	0.0512489
GO_CC_DR_PCG_PROTEIN_COMPLEX	6	Down	0.0514915
GO_CC_DR_FLAGELLUM	6	Down	0.0527221
GO_BP_DR_GLYCOGEN_BIOSYNTHETIC_PROCESS	6	Up	0.0529933
GO_BP_DR_PROTEIN_PHOSPHORYLATION	370	Down	0.0541945
GO_MF_DR_CYTOSKELETAL_ADAPTOR_ACTIVITY	12	Up	0.054346
GO_BP_DR_RESPONSE_TO_STRESS	28	Up	0.0548138
GO_BP_DR_SPINAL_CORD_MOTOR_NEURON_DIFFERENTIATION	6	Down	0.0551602
GO_MF_DR_CYSTEINE-TYPE_ENDOPEPTIDASE_INHIBITOR_ACTIVITY	6	Up	0.0563176
GO_BP_DR_ATP_CATABOLIC_PROCESS	122	Down	0.056634
GO_MF_DR_WNT-PROTEIN_BINDING	9	Down	0.0571377
GO_MF_DR_TRANSLATION_ELONGATION_FACTOR_ACTIVITY	14	Down	0.0571928
GO_BP_DR_UBIQUITIN-DEPENDENT_PROTEIN_CATABOLIC_PROCESS	72	Down	0.0574486
GO_MF_DR_CAMP-DEPENDENT_PROTEIN_KINASE_REGULATOR_ACTIVITY	6	Down	0.0576323
GO_MF_DR_UBIQUITIN_THIOLESTERASE_ACTIVITY	48	Down	0.0579205
GO_MF_DR_CALCIUM-DEPENDENT_PHOSPHOLIPID_BINDING	7	Up	0.0584254
GO_BP_DR_NEGATIVE_REGULATION_CYSTEINE-TYPE_ENDOPEPTIDASE_APOPTOTIC_PROCESS	6	Up	0.0623371
GO_BP_DR_RIBOSOME_BIOGENESIS	29	Down	0.0638914
GO_BP_DR_SMALL_GTPASE_MEDIATED_SIGNAL_TRANSDUCTION	156	Up	0.0641716
GO_BP_DR_RNA_MODIFICATION	13	Down	0.0649124
GO_BP_DR_CELLULAR_PROCESS	7	Down	0.0665152
GO_MF_DR_PROTEIN_DIMERIZATION_ACTIVITY	94	Up	0.0669473
GO_BP_DR_RRNA_METHYLATION	7	Down	0.0671522
GO_BP_DR_AUTOPHAGIC_VACUOLE_ASSEMBLY	7	Up	0.0673095
GO_MF_DR_ION_CHANNEL_ACTIVITY	57	Up	0.0674111
GO_BP_DR_TRANSCRIPTION_FROM_RNA_POLYMERASE_II_PROMOTER	7	Up	0.068056
GO_BP_DR_NEGATIVE_REGULATION_CATALYTIC_ACTIVITY	6	Up	0.0681453
GO_BP_DR_NOTOCHORD_DEVELOPMENT2	11	Up	0.0689103
GO_MF_DR_PROTEIN_TYROSINE_KINASE_ACTIVITY	337	Down	0.073355
GO_MF_DR_TRANSFERASE_ACTIVITY_TRANSFERRING_PHOSPHORUS-CONTAINING_GROUPS	390	Down	0.0735004
GO_MF_DR_HYDROLASE_ACTIVITY_ACTING_ON_ACID_ANHYDRIDES	14	Down	0.0738059
GO_MF_DR_SEQUENCE-SPECIFIC_DNA_BINDING	203	Up	0.074396
GO_BP_DR_REGULATION_CYCLIN-DEPENDENT_PROTEIN_KINASE_ACTIVITY	15	Up	0.0756924
GO_MF_DR_COPPER_ION_BINDING	12	Down	0.0776697
GO_BP_DR_CAMERA-TYPE_EYE_DEVELOPMENT	12	Down	0.0781884
GO_MF_DR_STRUCTURAL_MOLECULE_ACTIVITY	55	Up	0.0787477
GO_BP_DR_DNA_METHYLATION	8	Down	0.0802885
GO_CC_DR_COLLAGEN	12	Up	0.0832026
GO_BP_DR_METABOLIC_PROCESS	775	Down	0.0851475
GO_BP_DR_BASE-EXCISION_REPAIR	9	Down	0.0854925
GO_MF_DR_SULFOTRANSFERASE_ACTIVITY	14	Down	0.0864495
GO_CC_DR_CILIUM	18	Down	0.0866413
GO_BP_DR_MIDBRAIN_DEVELOPMENT	8	Down	0.0880472
GO_MF_DR_PSEUDOURIDINE_SYNTHASE_ACTIVITY	13	Down	0.0890444
GO_BP_DR_PROTEIN_METHYLATION	15	Down	0.090532
GO_CC_DR_MITOCHONDRIAL_ENVELOPE	6	Up	0.0918291
GO_CC_DR_UBIQUITIN_LIGASE_COMPLEX	16	Down	0.0921544
GO_BP_DR_FILOPODIUM_ASSEMBLY	14	Up	0.0921604
GO_MF_DR_TRANSMEMBRANE_RECEPTOR_PROTEIN_TYROSINE_KINASE_ACTIVITY	15	Down	0.0923211
GO_BP_DR_DORSAL_CONVERGENCE	8	Up	0.0940557
GO_BP_DR_REGULATION_CYCLE	30	Up	0.0950325
GO_BP_DR_G-PROTEIN_COUPLED_RECEPTOR_SIGNALING_PATHWAY	80	Up	0.0962022
GO_BP_DR_RETINA_LAYER_FORMATION	13	Down	0.096931
GO_MF_DR_ACTIN_FILAMENT_BINDING	10	Down	0.0970591
GO_MF_DR_ATP-DEPENDENT_HELICASE_ACTIVITY	67	Down	0.0980332
GO_BP_DR_INTRACELLULAR_PROTEIN_KINASE_CASCADE	9	Down	0.0989632
GO_BP_DR_PSEUDOURIDINE_SYNTHESIS	12	Down	0.100081
GO_MF_DR_RRNA_METHYLTRANSFERASE_ACTIVITY	6	Down	0.101826
GO_BP_DR_NEURON_DIFFERENTIATION	8	Down	0.102537
GO_MF_DR_P-P-BOND-HYDROLYSIS-DRIVEN_PROTEIN_TRANSMEMBRANE_TRANSPORTER_ACTIVITY	6	Up	0.103135
GO_BP_DR_RETINAL_GANGLION_AXON_GUIDANCE	16	Down	0.104278
GO_MF_DR_PROTEIN_METHYLTRANSFERASE_ACTIVITY	13	Down	0.106092
GO_BP_DR_INTRAHEPATIC_BILE_DUCT_DEVELOPMENT	6	Down	0.107999
GO_MF_DR_PROTEIN_KINASE_ACTIVITY	360	Down	0.108686
GO_MF_DR_INSULIN_RECEPTOR_BINDING	6	Down	0.112187
GO_MF_DR_ANTIPORTER_ACTIVITY	6	Down	0.113343
GO_MF_DR_35-CYCLIC-NUCLEOTIDE_PHOSPHODIESTERASE_ACTIVITY	10	Down	0.115037
GO_BP_DR_NEURON_MIGRATION	11	Down	0.11594
GO_BP_DR_PHOTOPERIODISM	7	Down	0.116968
GO_BP_DR_EMBRYONIC_HEART_TUBE_MORPHOGENESIS	10	Up	0.118067
GO_MF_DR_TRANSFERASE_ACTIVITY_TRANSFERRING_GLYCOSYL_GROUPS	74	Down	0.118082
GO_BP_DR_INTRACELLULAR_PROTEIN_TRANSPORT	181	Up	0.11944
GO_MF_DR_EXTRACELLULAR_MATRIX_STRUCTURAL_CONSTITUENT	6	Up	0.120067
GO_CC_DR_HETEROTRIMERIC_G-PROTEIN_COMPLEX	12	Up	0.120749
GO_BP_DR_INNER_EAR_DEVELOPMENT	7	Down	0.12128
GO_BP_DR_INTRAFLAGELLAR_TRANSPORT	6	Down	0.124961
GO_MF_DR_CARBOXYPEPTIDASE_ACTIVITY	8	Up	0.127502
GO_BP_DR_CYCLE	76	Up	0.129459
GO_MF_DR_TRANSFERASE_ACTIVITY_TRANSFERRING_ACYL_GROUPS	38	Down	0.130967
GO_BP_DR_CYTOKINESIS	6	Down	0.131042
GO_BP_DR_CHROMATIN_MODIFICATION	29	Down	0.131203
GO_BP_DR_MIDBRAIN-HINDBRAIN_BOUNDARY_DEVELOPMENT	8	Down	0.131401
GO_MF_DR_OXIDOREDUCTASE_ACTIVITY_ACTING_ON_CH-OH_GROUP_DONORS	8	Up	0.133643
GO_MF_DR_ACID-AMINO_ACID_LIGASE_ACTIVITY	64	Up	0.134885
GO_BP_DR_EMBRYONIC_HEART_TUBE_DEVELOPMENT	12	Up	0.136533
GO_MF_DR_SOLUTEHYDROGEN_ANTIPORTER_ACTIVITY	7	Down	0.136861
GO_BP_DR_TRNA_PROCESSING	28	Down	0.13869
GO_BP_DR_MELANOCYTE_DIFFERENTIATION	9	Down	0.139433
GO_MF_DR_RHO_GTPASE_BINDING	6	Up	0.140433
GO_BP_DR_REGULATION_ION_TRANSMEMBRANE_TRANSPORT	22	Up	0.141901
GO_MF_DR_PHOSPHOTRANSFERASE_ACTIVITY_ALCOHOL_GROUP_AS_ACCEPTOR	74	Down	0.142453
GO_BP_DR_REGULATION_SIGNAL_TRANSDUCTION	10	Up	0.142908
GO_MF_DR_GALACTOSYLTRANSFERASE_ACTIVITY	9	Down	0.145458
GO_MF_DR_DOUBLE-STRANDED_DNA_BINDING	20	Up	0.146095
GO_MF_DR_METALLOPEPTIDASE_ACTIVITY	32	Up	0.151038
GO_CC_DR_SPINDLE_POLE	6	Down	0.151088
GO_CC_DR_P_GRANULE	8	Up	0.151218
GO_CC_DR_SMALL_RIBOSOMAL_SUBUNIT	8	Down	0.152641
GO_BP_DR_STEROID_HORMONE_MEDIATED_SIGNALING_PATHWAY	27	Up	0.15441
GO_MF_DR_STEROID_HORMONE_RECEPTOR_ACTIVITY	27	Up	0.15441
GO_BP_DR_VASCULOGENESIS	17	Down	0.155993
GO_MF_DR_LIPID_BINDING	16	Up	0.156163
GO_BP_DR_DNA_METABOLIC_PROCESS	10	Down	0.156736
GO_BP_DR_NEGATIVE_REGULATION_TRANSLATIONAL_INITIATION	6	Up	0.15708
GO_MF_DR_NUCLEOTIDYLTRANSFERASE_ACTIVITY	35	Down	0.157541
GO_BP_DR_CARBOHYDRATE_BIOSYNTHETIC_PROCESS	6	Down	0.158397
GO_BP_DR_NEGATIVE_DNA-DEPENDENT	27	Down	0.160462
GO_BP_DR_EXTRACELLULAR_MATRIX_ORGANIZATION	6	Down	0.160863
GO_BP_DR_SKELETAL_MUSCLE_TISSUE_DEVELOPMENT	7	Down	0.162163
GO_CC_DR_APICAL_PLASMA_MEMBRANE	6	Up	0.163908
GO_BP_DR_CELL-ADHESION	8	Down	0.164437
GO_BP_DR_MRNA_PROCESSING	59	Up	0.165381
GO_BP_DR_ATP_SYNTHESIS_COUPLED_ELECTRON_TRANSPORT	6	Down	0.166162
GO_BP_DR_NEGATIVE_REGULATION_CANONICAL_WNT_RECEPTOR_SIGNALING_PATHWAY	6	Up	0.166499
GO_CC_DR_EUKARYOTIC_TRANSLATION_INITIATION_FACTOR_3_COMPLEX	6	Down	0.166579
GO_CC_DR_CHROMOSOME_CENTROMERIC_REGION	17	Up	0.168089
GO_MF_DR_ADENOSINE_DEAMINASE_ACTIVITY	6	Up	0.168599
GO_BP_DR_CELLULAR_COMPONENT_ORGANIZATION	10	Up	0.171134
GO_BP_DR_FATTY_ACID_BIOSYNTHETIC_PROCESS	9	Down	0.175547
GO_MF_DR_ENDOPEPTIDASE_INHIBITOR_ACTIVITY	8	Up	0.176281
GO_MF_DR_BETA-CATENIN_BINDING	8	Up	0.177045
GO_BP_DR_MULTICELLULAR_ORGANISMAL_DEVELOPMENT	167	Down	0.177425
GO_BP_DR_FIN_DEVELOPMENT	8	Down	0.177472
GO_BP_DR_AXONOGENESIS	12	Down	0.178716
GO_BP_DR_GLYCINE_CATABOLIC_PROCESS	7	Up	0.181576
GO_BP_DR_CARBOHYDRATE_TRANSMEMBRANE_TRANSPORT	7	Down	0.181602
GO_MF_DR_DNA-DEPENDENT_ATPASE_ACTIVITY	8	Down	0.183138
GO_BP_DR_TRNA_AMINOACYLATION_FOR_PROTEIN_TRANSLATION	29	Down	0.184731
GO_BP_DR_MICROTUBULE-BASED_MOVEMENT	49	Down	0.186569
GO_MF_DR_PROTEIN_HOMODIMERIZATION_ACTIVITY	20	Up	0.187042
GO_CC_DR_KINETOCHORE	9	Up	0.187353
GO_BP_DR_PROTEIN_IMPORT_NUCLEUS	9	Up	0.188433
GO_BP_DR_CELLULAR_METABOLIC_PROCESS	27	Down	0.188532
GO_CC_DR_CYTOPLASMIC_VESICLE	10	Up	0.192992
GO_BP_DR_TRNA_MODIFICATION	8	Down	0.194219
GO_MF_DR_MICROTUBULE_MOTOR_ACTIVITY	39	Down	0.19593
GO_BP_DR_RESPONSE_TO_BACTERIUM	6	Up	0.196853
GO_BP_DR_GLUCOSE_METABOLIC_PROCESS	6	Up	0.198013
GO_BP_DR_NUCLEOBASE-CONTAINING_COMPOUND_METABOLIC_PROCESS	26	Down	0.198164
GO_MF_DR_SUGARHYDROGEN_SYMPORTER_ACTIVITY	6	Down	0.199277
GO_BP_DR_INTRACELLULAR_TRANSPORT	11	Down	0.199577
GO_BP_DR_FATTY_ACID_METABOLIC_PROCESS	11	Down	0.2023
GO_MF_DR_VOLTAGE-GATED_ION_CHANNEL_ACTIVITY	8	Up	0.202699
GO_BP_DR_ION_TRANSPORT	91	Up	0.203278
GO_MF_DR_G-PROTEIN_BETA_GAMMA-SUBUNIT_COMPLEX_BINDING	8	Up	0.20344
GO_BP_DR_ZINC_ION_TRANSPORT	8	Up	0.205329
GO_BP_DR_ZINC_ION_TRANSMEMBRANE_TRANSPORT	8	Up	0.205329
GO_MF_DR_ZINC_ION_TRANSMEMBRANE_TRANSPORTER_ACTIVITY	8	Up	0.205329
GO_BP_DR_HEART_DEVELOPMENT	53	Up	0.206909
GO_MF_DR_FMN_BINDING	8	Down	0.209519
GO_MF_DR_TRANSMEMBRANE_SIGNALING_RECEPTOR_ACTIVITY	24	Down	0.210485
GO_MF_DR_AMINOACYL-TRNA_LIGASE_ACTIVITY	33	Down	0.211971
GO_CC_DR_PROJECTION	25	Down	0.21422
GO_MF_DR_SINGLE-STRANDED_DNA_BINDING	13	Down	0.214375
GO_BP_DR_PEPTIDYL-LYSINE_METHYLATION	13	Down	0.215613
GO_MF_DR_FLAVIN_ADENINE_DINUCLEOTIDE_BINDING	37	Down	0.219144
GO_BP_DR_DNA_DUPLEX_UNWINDING	10	Down	0.219518
GO_CC_DR_NUCLEOPLASM	11	Down	0.222064
GO_BP_DR_GONAD_DEVELOPMENT	9	Down	0.222309
GO_MF_DR_SCAVENGER_RECEPTOR_ACTIVITY	6	Down	0.222512
GO_BP_DR_MUSCLE_ORGAN_DEVELOPMENT	10	Down	0.22515
GO_MF_DR_SIGNAL_TRANSDUCER_ACTIVITY	106	Down	0.225786
GO_BP_DR_CONVERGENT_EXTENSION_GASTRULATION	34	Down	0.227061
GO_BP_DR_LIPID_TRANSPORT	20	Up	0.228041
GO_MF_DR_G-PROTEIN_COUPLED_RECEPTOR_ACTIVITY	39	Down	0.230769
GO_BP_DR_TRNA_AMINOACYLATION	6	Down	0.230858
GO_BP_DR_REGULATION_CATALYTIC_ACTIVITY	97	Down	0.233252
GO_CC_DR_KINESIN_COMPLEX	6	Down	0.235334
GO_MF_DR_CATION_TRANSMEMBRANE_TRANSPORTER_ACTIVITY	13	Up	0.235398
GO_MF_DR_CALCIUM-TRANSPORTING_ATPASE_ACTIVITY	8	Up	0.238167
GO_BP_DR_PIGMENT_GRANULE_AGGREGATION_IN_CENTER	6	Down	0.239496
GO_BP_DR_PROTEIN_UBIQUITINATION_UBIQUITIN-DEPENDENT_PROTEIN_CATABOLIC_PROCESS	10	Up	0.245791
GO_BP_DR_MYOFIBRIL_ASSEMBLY	6	Down	0.246152
GO_BP_DR_PROTEIN_AUTOPHOSPHORYLATION	10	Down	0.247066
GO_BP_DR_MAPK_CASCADE	12	Down	0.247214
GO_MF_DR_MAP_KINASE_ACTIVITY	12	Down	0.247214
GO_BP_DR_REGULATION_SMALL_GTPASE_MEDIATED_SIGNAL_TRANSDUCTION	31	Down	0.247319
GO_MF_DR_RNA_POLYMERASE_II_DISTAL_ENHANCER_SEQUENCE-SPECIFIC_DNA_BINDING_TRANSCRIPTION_FACTOR_ACTIVITY	17	Up	0.248494
GO_MF_DR_DNA_BINDING_BENDING	17	Up	0.248494
GO_MF_DR_2_IRON_2_SULFUR_CLUSTER_BINDING	11	Up	0.250275
GO_BP_DR_DNA-DEPENDENT	454	Down	0.251641
GO_MF_DR_OXIDOREDUCTASE_ACTIVITY_ACTING_ON_NADH_OR_NADPH	9	Down	0.253671
GO_BP_DR_EMBRYONIC_CRANIAL_SKELETON_MORPHOGENESIS	12	Down	0.254809
GO_MF_DR_TRANSFORMING_GROWTH_FACTOR_BETA-ACTIVATED_RECEPTOR_ACTIVITY	7	Up	0.255582
GO_BP_DR_VESICLE_DOCKING_EXOCYTOSIS	8	Down	0.257717
GO_BP_DR_GROWTH2	9	Up	0.258066
GO_BP_DR_REGULATION_SEQUENCE-SPECIFIC_DNA_BINDING_TRANSCRIPTION_FACTOR_ACTIVITY	17	Up	0.258328
GO_CC_DR_LARGE_RIBOSOMAL_SUBUNIT	8	Down	0.260686
GO_MF_DR_SULFURIC_ESTER_HYDROLASE_ACTIVITY	12	Down	0.262642
GO_BP_DR_DNA_REPAIR	87	Down	0.264277
GO_BP_DR_PATTERN_SPECIFICATION_PROCESS	17	Up	0.267788
GO_CC_DR_PREFOLDIN_COMPLEX	9	Down	0.273243
GO_BP_DR_CENTRAL_NERVOUS_SYSTEM_DEVELOPMENT	8	Down	0.273936
GO_BP_DR_ANGIOGENESIS	32	Up	0.276553
GO_MF_DR_GROWTH_FACTOR_ACTIVITY	15	Up	0.277248
GO_BP_DR_FERROUS_IRON_TRANSPORT	17	Down	0.277522
GO_MF_DR_FERROUS_IRON_TRANSMEMBRANE_TRANSPORTER_ACTIVITY	17	Down	0.277522
GO_CC_DR_RIBONUCLEOPROTEIN_COMPLEX	100	Down	0.279335
GO_BP_DR_RESPONSE_TO_COPPER_ION	6	Up	0.280143
GO_BP_DR_GLYCEROL_METABOLIC_PROCESS	7	Up	0.280247
GO_BP_DR_ANTERIOR_POSTERIOR_PATTERN_SPECIFICATION	13	Down	0.282008
GO_MF_DR_LYASE_ACTIVITY	40	Down	0.284942
GO_MF_DR_PYRIDOXAL_PHOSPHATE_BINDING	32	Up	0.287018
GO_BP_DR_SURFACE_RECEPTOR_SIGNALING_PATHWAY	23	Down	0.288049
GO_CC_DR_GOLGI_APPARATUS	76	Up	0.288616
GO_MF_DR_GLUTATHIONE_TRANSFERASE_ACTIVITY	6	Up	0.289312
GO_BP_DR_BRAIN_DEVELOPMENT	31	Down	0.291898
GO_CC_DR_TIGHT_JUNCTION	20	Up	0.293015
GO_MF_DR_CHROMATIN_BINDING	18	Down	0.295301
GO_BP_DR_CARBOHYDRATE_PHOSPHORYLATION	6	Down	0.30039
GO_BP_DR_PATTERNING_BLOOD_VESSELS	7	Down	0.300929
GO_BP_DR_AXON_GUIDANCE	13	Down	0.304179
GO_BP_DR_DOUBLE-STRAND_BREAK_REPAIR	6	Up	0.30676
GO_CC_DR_EXTRACELLULAR_MATRIX	10	Down	0.31152
GO_BP_DR_PROTON_TRANSPORT	43	Down	0.312507
GO_BP_DR_PHOSPHATIDYLINOSITOL-MEDIATED_SIGNALING	7	Down	0.315799
GO_MF_DR_CALMODULIN_BINDING	11	Up	0.317765
GO_MF_DR_OMEGA_PEPTIDASE_ACTIVITY	7	Up	0.31858
GO_BP_DR_DIVISION	59	Up	0.318586
GO_CC_DR_GOLGI_CISTERNA_MEMBRANE	7	Down	0.318799
GO_MF_DR_TRANSCRIPTION_REGULATORY_REGION_SEQUENCE-SPECIFIC_DNA_BINDING	6	Down	0.319227
GO_BP_DR_REDOX_HOMEOSTASIS	42	Down	0.321322
GO_MF_DR_PHOSPHATIDYLINOSITOL_BINDING	40	Down	0.322052
GO_MF_DR_RRNA_BINDING	9	Down	0.325211
GO_CC_DR_Z_DISC	9	Down	0.325935
GO_MF_DR_UBIQUITIN-SPECIFIC_PROTEASE_ACTIVITY	8	Down	0.326448
GO_MF_DR_TRANSLATION_INITIATION_FACTOR_ACTIVITY	47	Down	0.328984
GO_BP_DR_POSITIVE_DNA-DEPENDENT	35	Up	0.330655
GO_CC_DR_PROTEASOME_COMPLEX	33	Down	0.330684
GO_BP_DR_EYE_DEVELOPMENT	8	Up	0.3313
GO_MF_DR_CARBOXYLESTERASE_ACTIVITY	6	Down	0.331866
GO_MF_DR_GLYCEROPHOSPHODIESTER_PHOSPHODIESTERASE_ACTIVITY	6	Up	0.332408
GO_BP_DR_DETERMINATION_HEART_LEFT_RIGHT_ASYMMETRY	6	Down	0.336711
GO_MF_DR_AMINO_ACID_TRANSMEMBRANE_TRANSPORTER_ACTIVITY	8	Up	0.33727
GO_BP_DR_PROTEIN_IMPORT_MITOCHONDRIAL_INNER_MEMBRANE	6	Up	0.33732
GO_CC_DR_MITOCHONDRIAL_INTERMEMBRANE_SPACE_PROTEIN_TRANSPORTER_COMPLEX	6	Up	0.33732
GO_CC_DR_ENDOSOME	22	Down	0.338674
GO_MF_DR_NAD_BINDING	9	Up	0.340738
GO_BP_DR_RETINA_DEVELOPMENT_IN_CAMERA-TYPE_EYE	40	Down	0.341653
GO_MF_DR_ANTIOXIDANT_ACTIVITY	11	Down	0.341963
GO_MF_DR_HISTONE-LYSINE_N-METHYLTRANSFERASE_ACTIVITY	17	Down	0.34229
GO_BP_DR_FROM_RNA_POLYMERASE_II_PROMOTER	46	Up	0.342527
GO_CC_DR_MHC_CLASS_I_PROTEIN_COMPLEX	7	Up	0.342609
GO_MF_DR_MRNA_BINDING	6	Up	0.343659
GO_BP_DR_TRANSLATIONAL_INITIATION	48	Down	0.344052
GO_BP_DR_MIGRATION_GASTRULATION	32	Up	0.344613
GO_MF_DR_ATP-DEPENDENT_DNA_HELICASE_ACTIVITY	8	Down	0.345186
GO_MF_DR_RECEPTOR_ACTIVITY	267	Up	0.34688
GO_BP_DR_PROTEIN_TARGETING_TO_MITOCHONDRION	9	Up	0.351093
GO_BP_DR_ATP_SYNTHESIS_COUPLED_PROTON_TRANSPORT	17	Down	0.351442
GO_CC_DR_CYTOSOLIC_SMALL_RIBOSOMAL_SUBUNIT	6	Down	0.352394
GO_BP_DR_PROTEIN_HOMOOLIGOMERIZATION	18	Up	0.352934
GO_MF_DR_ACID_PHOSPHATASE_ACTIVITY	9	Down	0.359856
GO_BP_DR_CALCIUM_ION_TRANSPORT	19	Up	0.359882
GO_BP_DR_LIPID_CATABOLIC_PROCESS	9	Down	0.360867
GO_CC_DR_CHROMOSOME	60	Up	0.363784
GO_MF_DR_KINASE_ACTIVITY	305	Down	0.365028
GO_MF_DR_HYDROGEN_ION_TRANSPORTING_ATP_SYNTHASE_ACTIVITY_ROTATIONAL_MECHANISM	11	Down	0.366972
GO_MF_DR_CYSTEINE-TYPE_PEPTIDASE_ACTIVITY	57	Down	0.367605
GO_MF_DR_N-ACETYLTRANSFERASE_ACTIVITY	13	Up	0.3702
GO_BP_DR_VASCULATURE_DEVELOPMENT	11	Down	0.370487
GO_BP_DR_CARBOHYDRATE_METABOLIC_PROCESS	99	Up	0.371048
GO_MF_DR_HYDROLASE_ACTIVITY_ACTING_ON_CARBON-NITROGEN_BUT_NOT_PEPTIDE_BONDS	8	Up	0.371595
GO_BP_DR_GLUTATHIONE_BIOSYNTHETIC_PROCESS	7	Up	0.372342
GO_BP_DR_CARTILAGE_DEVELOPMENT	34	Down	0.373705
GO_CC_DR_INTRINSIC_TO_ENDOPLASMIC_RETICULUM_MEMBRANE	9	Down	0.378545
GO_MF_DR_NADP_BINDING2	11	Up	0.379084
GO_BP_DR_MITOSIS	35	Up	0.387041
GO_BP_DR_FOREBRAIN_DEVELOPMENT	8	Down	0.38798
GO_BP_DR_RESPONSE_TO_OXIDATIVE_STRESS	6	Down	0.390304
GO_MF_DR_NADH_DEHYDROGENASE_UBIQUINONE_ACTIVITY	19	Down	0.393125
GO_BP_DR_MEIOSIS	9	Up	0.393213
GO_BP_DR_LIPOPOLYSACCHARIDE_BIOSYNTHETIC_PROCESS	37	Down	0.395554
GO_BP_DR_PROTEOLYSIS_CELLULAR_PROTEIN_CATABOLIC_PROCESS	16	Down	0.396023
GO_CC_DR_PROTEASOME_CORE_COMPLEX	16	Down	0.396023
GO_MF_DR_THREONINE-TYPE_ENDOPEPTIDASE_ACTIVITY	16	Down	0.396023
GO_BP_DR_SODIUM_ION_EXPORT	18	Down	0.397386
GO_BP_DR_ERYTHROCYTE_DIFFERENTIATION	8	Down	0.397852
GO_CC_DR_NUCLEOSOME	24	Down	0.398324
GO_MF_DR_VOLTAGE-GATED_CHLORIDE_CHANNEL_ACTIVITY	9	Up	0.398469
GO_MF_DR_STEROID_BINDING	6	Down	0.399076
GO_BP_DR_TRANSFORMING_GROWTH_FACTOR_BETA_RECEPTOR_SIGNALING_PATHWAY	14	Up	0.399407
GO_MF_DR_ATPASE_ACTIVITY_COUPLED_TO_TRANSMEMBRANE_MOVEMENT_SUBSTANCES	23	Down	0.399814
GO_BP_DR_PHOSPHOLIPID_BIOSYNTHETIC_PROCESS	10	Up	0.400951
GO_BP_DR_PEPTIDYL-PROLINE_MODIFICATION	8	Down	0.403374
GO_MF_DR_FK506_BINDING	8	Down	0.403374
GO_CC_DR_SPINDLE	10	Down	0.404245
GO_BP_DR_LIPID_METABOLIC_PROCESS	54	Down	0.404887
GO_BP_DR_REGULATION_RHO_PROTEIN_SIGNAL_TRANSDUCTION	54	Down	0.409753
GO_MF_DR_RHO_GUANYL-NUCLEOTIDE_EXCHANGE_FACTOR_ACTIVITY	54	Down	0.409753
GO_BP_DR_KIDNEY_DEVELOPMENT	7	Down	0.410701
GO_BP_DR_RNA_METHYLATION	10	Down	0.41188
GO_MF_DR_ENDOPEPTIDASE_ACTIVITY	18	Down	0.41872
GO_MF_DR_G-PROTEIN_COUPLED_RECEPTOR_BINDING	6	Up	0.423462
GO_MF_DR_MAGNESIUM_ION_BINDING	68	Down	0.425744
GO_MF_DR_CYSTEINE-TYPE_ENDOPEPTIDASE_ACTIVITY	19	Down	0.426442
GO_BP_DR_COENZYME_A_BIOSYNTHETIC_PROCESS	6	Down	0.429538
GO_BP_DR_POSITIVE_FROM_RNA_POLYMERASE_II_PROMOTER	19	Up	0.430311
GO_BP_DR_RESPONSE_TO_IONIZING_RADIATION	6	Down	0.432044
GO_CC_DR_CULLIN-RING_UBIQUITIN_LIGASE_COMPLEX	7	Down	0.432127
GO_MF_DR_UBIQUITIN_PROTEIN_LIGASE_BINDING	7	Down	0.432127
GO_MF_DR_PHOSPHOLIPID-TRANSLOCATING_ATPASE_ACTIVITY	10	Up	0.432682
GO_BP_DR_RESPONSE_TO_LIGHT_STIMULUS	8	Down	0.43335
GO_BP_DR_ER_TO_GOLGI_VESICLE-MEDIATED_TRANSPORT	7	Up	0.434546
GO_BP_DR_PHOSPHATIDYLINOSITOL_METABOLIC_PROCESS	6	Down	0.434816
GO_MF_DR_PHOSPHATIDYLINOSITOL_PHOSPHATE_KINASE_ACTIVITY	6	Down	0.434816
GO_BP_DR_SKELETAL_SYSTEM_DEVELOPMENT	9	Up	0.438774
GO_MF_DR_DOUBLE-STRANDED_RNA_BINDING	18	Up	0.441726
GO_BP_DR_PHOSPHOLIPID_TRANSPORT	12	Up	0.442366
GO_MF_DR_ENDONUCLEASE_ACTIVITY	20	Down	0.442573
GO_MF_DR_RECEPTOR_SIGNALING_PROTEIN_ACTIVITY	9	Down	0.445769
GO_BP_DR_PROTEIN_K63-LINKED_DEUBIQUITINATION	7	Up	0.446928
GO_BP_DR_PROLIFERATION	11	Down	0.447678
GO_MF_DR_HYDROLASE_ACTIVITY	438	Down	0.448187
GO_BP_DR_TRANSMEMBRANE_RECEPTOR_PROTEIN_TYROSINE_KINASE_SIGNALING_PATHWAY	22	Down	0.449829
GO_BP_DR_CILIUM_MORPHOGENESIS	12	Down	0.450789
GO_CC_DR_JUNCTION	33	Up	0.452772
GO_BP_DR_OTOLITH_DEVELOPMENT	6	Up	0.453192
GO_CC_DR_TRANSCRIPTION_FACTOR_COMPLEX	50	Up	0.453272
GO_BP_DR_NOTCH_SIGNALING_PATHWAY	25	Up	0.45402
GO_BP_DR_DEFINITIVE_HEMOPOIESIS	6	Down	0.455599
GO_MF_DR_COFACTOR_BINDING	12	Up	0.457221
GO_MF_DR_PROTEIN_KINASE_C_ACTIVITY	9	Down	0.458498
GO_BP_DR_GLUTAMINE_METABOLIC_PROCESS	6	Down	0.46208
GO_MF_DR_OXIDOREDUCTASE_PAIRED_DONORS_MOLECULAR_OXYGEN_2-OXOGLUTARATE_ONE_ATOM_EACH_OXYGEN_BOTH_DONORS	18	Up	0.46218
GO_CC_DR_BASOLATERAL_PLASMA_MEMBRANE	7	Down	0.464279
GO_BP_DR_LIVER_DEVELOPMENT	23	Up	0.467667
GO_BP_DR_POSITIVE_REGULATION_FIBROBLAST_GROWTH_FACTOR_RECEPTOR_SIGNALING_PATHWAY	6	Up	0.468692
GO_CC_DR_CYTOSKELETON	109	Down	0.468702
GO_BP_DR_DOUBLE-STRAND_BREAK_REPAIR_VIA_HOMOLOGOUS_RECOMBINATION	6	Down	0.468911
GO_CC_DR_GOLGI_MEMBRANE	33	Up	0.468953
GO_BP_DR_PROTEASOMAL_UBIQUITIN-DEPENDENT_PROTEIN_CATABOLIC_PROCESS	10	Up	0.471232
GO_BP_DR_TRANSCRIPTION_DNA-DEPENDENT	218	Down	0.477913
GO_BP_DR_HISTONE_LYSINE_METHYLATION	15	Down	0.478875
GO_MF_DR_PROTEIN_HETERODIMERIZATION_ACTIVITY	12	Up	0.480276
GO_BP_DR_ELECTRON_TRANSPORT_CHAIN	16	Down	0.484701
GO_MF_DR_OXIDOREDUCTASE_SINGLE_DONORS_MOLECULAR_OXYGEN_INCORPORATION_TWO_ATOMS_OXYGEN	15	Down	0.484988
GO_MF_DR_SERINE-TYPE_ENDOPEPTIDASE_INHIBITOR_ACTIVITY	16	Up	0.486362
GO_MF_DR_PROTEIN_TRANSPORTER_ACTIVITY	36	Down	0.48721
GO_CC_DR_RETROMER_COMPLEX	7	Up	0.488669
GO_MF_DR_SERINE-TYPE_PEPTIDASE_ACTIVITY	22	Up	0.489748
GO_BP_DR_GERM_MIGRATION	6	Down	0.490804
GO_CC_DR_EXTRINSIC_TO_MEMBRANE	10	Down	0.491948
GO_MF_DR_CYTOSKELETAL_PROTEIN_BINDING	14	Up	0.494299
GO_BP_DR_POSITIVE_REGULATION_I-KAPPAB_KINASE_NF-KAPPAB_CASCADE	7	Down	0.49691
GO_BP_DR_MISMATCH_REPAIR	6	Down	0.496975
GO_MF_DR_MISMATCHED_DNA_BINDING	6	Down	0.496975
GO_MF_DR_DAMAGED_DNA_BINDING	22	Down	0.497346
GO_MF_DR_DNA_TOPOISOMERASE_TYPE_I_ACTIVITY	9	Up	0.501048
GO_CC_DR_MITOCHONDRIAL_OUTER_MEMBRANE	22	Up	0.501559
GO_CC_DR_AXON	7	Down	0.502579
GO_CC_DR_PLASMA_MEMBRANE	119	Down	0.504365
GO_BP_DR_STEROID_BIOSYNTHETIC_PROCESS	9	Down	0.505241
GO_BP_DR_PHOTOSYNTHESIS	6	Down	0.507609
GO_BP_DR_CHLOROPHYLL_BIOSYNTHETIC_PROCESS	6	Down	0.507609
GO_MF_DR_MAGNESIUM_CHELATASE_ACTIVITY	6	Down	0.507609
GO_MF_DR_ADENYLATE_CYCLASE_ACTIVITY	6	Down	0.508011
GO_BP_DR_NUCLEOTIDE_PHOSPHORYLATION	6	Up	0.509398
GO_BP_DR_REGULATION_PHOSPHORYLATION	8	Down	0.515177
GO_BP_DR_RECEPTOR-MEDIATED_ENDOCYTOSIS	7	Down	0.51522
GO_BP_DR_CANONICAL_WNT_RECEPTOR_SIGNALING_PATHWAY	21	Down	0.516012
GO_BP_DR_PROTEIN_COMPLEX_ASSEMBLY	8	Up	0.517634
GO_BP_DR_NEGATIVE_REGULATION_ENDOPEPTIDASE_ACTIVITY	27	Up	0.518301
GO_CC_DR_MICROTUBULE_ORGANIZING_CENTER	15	Up	0.519196
GO_MF_DR_CALCIUM_ION_BINDING	220	Down	0.519753
GO_MF_DR_TRANSPORTER_ACTIVITY	44	Up	0.521179
GO_MF_DR_ISOMERASE_ACTIVITY	40	Up	0.523293
GO_CC_DR_PROTON-TRANSPORTING_V-TYPE_ATPASE_V1_DOMAIN	7	Up	0.523299
GO_BP_DR_PHOSPHORYLATION	316	Down	0.524653
GO_CC_DR_INTEGRAL_TO_PLASMA_MEMBRANE	23	Down	0.524762
GO_BP_DR_MESODERMAL_MIGRATION	7	Up	0.528574
GO_MF_DR_CALCIUM_CHANNEL_ACTIVITY	11	Down	0.529685
GO_CC_DR_LYSOSOMAL_MEMBRANE	9	Down	0.5349
GO_BP_DR_EXOCRINE_PANCREAS_DEVELOPMENT	12	Down	0.538678
GO_BP_DR_NEGATIVE_REGULATION_WNT_RECEPTOR_SIGNALING_PATHWAY	10	Up	0.538766
GO_MF_DR_HYDROLASE_ACTIVITY_ACTING_ON_ACID_ANHYDRIDES_CATALYZING_TRANSMEMBRANE_MOVEMENT_SUBSTANCES	30	Up	0.540069
GO_CC_DR_CORTEX	9	Up	0.541187
GO_BP_DR_PRONEPHROS_DEVELOPMENT	19	Up	0.541492
GO_BP_DR_PROTEIN_POLYMERIZATION	13	Down	0.543341
GO_BP_DR_PROTEIN_PEPTIDYL-PROLYL_ISOMERIZATION	15	Up	0.546427
GO_BP_DR_TRANSMEMBRANE_RECEPTOR_PROTEIN_SERINE_THREONINE_KINASE_SIGNALING_PATHWAY	6	Up	0.54697
GO_CC_DR_LATE_ENDOSOME_MEMBRANE	7	Up	0.54709
GO_CC_DR_PROTON-TRANSPORTING_TWO-SECTOR_ATPASE_COMPLEX_CATALYTIC_DOMAIN	7	Up	0.547944
GO_BP_DR_CYTOSKELETON_ORGANIZATION	16	Up	0.548461
GO_CC_DR_CHROMATIN	7	Down	0.548636
GO_MF_DR_PROTEIN_DOMAIN_SPECIFIC_BINDING	19	Up	0.549268
GO_BP_DR_PURINE_NUCLEOTIDE_BIOSYNTHETIC_PROCESS	8	Down	0.549776
GO_MF_DR_HYDROGEN_ION_TRANSMEMBRANE_TRANSPORTER_ACTIVITY	17	Down	0.550953
GO_MF_DR_4_IRON_4_SULFUR_CLUSTER_BINDING	13	Down	0.551594
GO_BP_DR_PROJECTION_ORGANIZATION	10	Down	0.551909
GO_CC_DR_NUCLEOLUS	44	Down	0.5565
GO_BP_DR_CALCIUM_ION_TRANSMEMBRANE_TRANSPORT	21	Up	0.557213
GO_BP_DR_VACUOLAR_TRANSPORT	8	Up	0.557526
GO_BP_DR_REGULATION_ARF_GTPASE_ACTIVITY	20	Down	0.560455
GO_MF_DR_ARF_GTPASE_ACTIVATOR_ACTIVITY	20	Down	0.560455
GO_BP_DR_NUCLEOSOME_ASSEMBLY	29	Down	0.561138
GO_BP_DR_INDUCTION_APOPTOSIS	7	Up	0.561983
GO_CC_DR_CONDENSED_CHROMOSOME_KINETOCHORE	8	Up	0.569133
GO_BP_DR_GENE_SILENCING_BY_RNA	12	Up	0.569425
GO_CC_DR_MICROTUBULE	49	Up	0.571916
GO_MF_DR_TRANSMEMBRANE_RECEPTOR_PROTEIN_SERINE_THREONINE_KINASE_ACTIVITY	8	Up	0.573933
GO_CC_DR_DYNEIN_COMPLEX	8	Down	0.574848
GO_CC_DR_INTEGRAL_TO_ENDOPLASMIC_RETICULUM_MEMBRANE	10	Up	0.576591
GO_CC_DR_PROTON-TRANSPORTING_TWO-SECTOR_ATPASE_COMPLEX_PROTON-TRANSPORTING_DOMAIN	8	Down	0.587831
GO_BP_DR_SODIUM_ION_TRANSPORT	12	Up	0.590835
GO_CC_DR_PROTEIN_PHOSPHATASE_TYPE_2A_COMPLEX	7	Down	0.595689
GO_MF_DR_PROTEIN_PHOSPHATASE_TYPE_2A_REGULATOR_ACTIVITY	7	Down	0.595689
GO_BP_DR_ISOPRENOID_BIOSYNTHETIC_PROCESS	7	Down	0.597792
GO_BP_DR_ION_TRANSMEMBRANE_TRANSPORT	99	Up	0.598545
GO_CC_DR_CENTROSOME	7	Down	0.59958
GO_CC_DR_SPLICEOSOMAL_COMPLEX	16	Up	0.601519
GO_MF_DR_INOSITOL-145-TRISPHOSPHATE_3-KINASE_ACTIVITY	7	Down	0.602117
GO_BP_DR_AMINO_ACID_TRANSMEMBRANE_TRANSPORT	11	Up	0.60217
GO_BP_DR_PENTOSE-PHOSPHATE_SHUNT	9	Up	0.607652
GO_BP_DR_RETINA_MORPHOGENESIS_IN_CAMERA-TYPE_EYE	9	Down	0.6118
GO_MF_DR_PROTEIN_SERINE_THREONINE_KINASE_ACTIVITY	223	Down	0.61487
GO_BP_DR_EMBRYONIC_PECTORAL_FIN_MORPHOGENESIS	7	Up	0.616878
GO_BP_DR_CHLORIDE_TRANSPORT	13	Up	0.624098
GO_MF_DR_ACYL-COA_DEHYDROGENASE_ACTIVITY	13	Down	0.624684
GO_MF_DR_PEPTIDASE_ACTIVITY	117	Down	0.625473
GO_BP_DR_METAL_ION_TRANSPORT	9	Up	0.627047
GO_BP_DR_NEURAL_CREST_MIGRATION	18	Down	0.629308
GO_BP_DR_FIN_REGENERATION	18	Down	0.630852
GO_MF_DR_SNAP_RECEPTOR_ACTIVITY	7	Up	0.632712
GO_CC_DR_MEMBRANE_COAT	15	Down	0.633312
GO_BP_DR_MELANOSOME_TRANSPORT	9	Down	0.635952
GO_MF_DR_GUANYL-NUCLEOTIDE_EXCHANGE_FACTOR_ACTIVITY	42	Down	0.637051
GO_BP_DR_SIGNAL_TRANSDUCTION_BY_PHOSPHORYLATION	19	Down	0.644819
GO_CC_DR_PROTEASOME_CORE_COMPLEX_ALPHA-SUBUNIT_COMPLEX	8	Down	0.645187
GO_BP_DR_CHROMOSOME_SEGREGATION	12	Down	0.647378
GO_MF_DR_EXONUCLEASE_ACTIVITY	16	Down	0.647438
GO_MF_DR_AMINOPEPTIDASE_ACTIVITY	13	Up	0.647799
GO_CC_DR_LAMELLIPODIUM	6	Down	0.648115
GO_MF_DR_UBIQUITIN-PROTEIN_LIGASE_ACTIVITY	61	Down	0.648471
GO_MF_DR_IRON_ION_BINDING	43	Up	0.649011
GO_CC_DR_PERINUCLEAR_REGION_CYTOPLASM	17	Up	0.649517
GO_BP_DR_RNA_METABOLIC_PROCESS	16	Up	0.651724
GO_BP_DR_TERMINATION_G-PROTEIN_COUPLED_RECEPTOR_SIGNALING_PATHWAY	20	Up	0.654287
GO_MF_DR_PROTEIN_TYROSINE_PHOSPHATASE_ACTIVITY	57	Up	0.655119
GO_BP_DR_DNA-DEPENDENT_DNA_REPLICATION_INITIATION	6	Down	0.656307
GO_BP_DR_CATION_TRANSPORT	52	Up	0.656864
GO_BP_DR_EMBRYO_DEVELOPMENT	67	Down	0.658183
GO_CC_DR_ANAPHASE-PROMOTING_COMPLEX	7	Up	0.658521
GO_MF_DR_SMALL_GTPASE_REGULATOR_ACTIVITY	15	Down	0.663128
GO_BP_DR_HEMOPOIETIC_STEM_DIFFERENTIATION	6	Down	0.664789
GO_MF_DR_HEME_BINDING	34	Up	0.666286
GO_BP_DR_PROTEIN_GLYCOSYLATION	29	Down	0.667926
GO_BP_DR_RNA_PROCESSING	42	Up	0.669363
GO_BP_DR_REGULATION_ANION_TRANSPORT	13	Up	0.670401
GO_MF_DR_OXIDOREDUCTASE_PAIRED_DONORS_MOLECULAR_OXYGEN_REDUCED_FLAVIN_OR_FLAVOPROTEIN_ONE_ATOM_OXYGEN	7	Up	0.674258
GO_CC_DR_PEROXISOME	11	Up	0.67741
GO_CC_DR_NUCLEAR_MEMBRANE	6	Up	0.677551
GO_MF_DR_ACTIN_BINDING	92	Up	0.680363
GO_BP_DR_RETINOIC_ACID_RECEPTOR_SIGNALING_PATHWAY	7	Down	0.680393
GO_BP_DR_IRON-SULFUR_CLUSTER_ASSEMBLY	8	Up	0.680771
GO_BP_DR_UMP_BIOSYNTHETIC_PROCESS	7	Down	0.686459
GO_BP_DR_EMBRYONIC_HEMOPOIESIS	8	Down	0.688228
GO_BP_DR_PROTEIN_FOLDING	84	Up	0.691541
GO_BP_DR_PEPTIDYL-TYROSINE_DEPHOSPHORYLATION	51	Up	0.691633
GO_BP_DR_NUCLEIC_ACID_PHOSPHODIESTER_BOND_HYDROLYSIS	50	Down	0.692974
GO_MF_DR_IDENTICAL_PROTEIN_BINDING	13	Up	0.697936
GO_BP_DR_PROTEIN_ADP-RIBOSYLATION	6	Down	0.698819
GO_MF_DR_ASPARTIC-TYPE_ENDOPEPTIDASE_ACTIVITY	8	Down	0.701846
GO_CC_DR_PROTEIN_COMPLEX	15	Down	0.702067
GO_BP_DR_CONVERGENT_EXTENSION_AXIS_ELONGATION	13	Down	0.704417
GO_CC_DR_MITOCHONDRION	125	Up	0.706611
GO_BP_DR_REGULATION_APOPTOTIC_PROCESS	30	Up	0.707321
GO_BP_DR_NEUROPEPTIDE_SIGNALING_PATHWAY	9	Down	0.708501
GO_MF_DR_MONOOXYGENASE_ACTIVITY	26	Up	0.708938
GO_MF_DR_UBIQUITIN_BINDING	7	Down	0.7141
GO_CC_DR_CYTOPLASM	675	Up	0.714375
GO_MF_DR_RNA_METHYLTRANSFERASE_ACTIVITY	7	Down	0.716747
GO_BP_DR_ADHESION	57	Down	0.717669
GO_MF_DR_NUCLEASE_ACTIVITY	24	Down	0.719865
GO_MF_DR_OXIDOREDUCTASE_ACTIVITY_ACTING_ON_THE_CH-OH_GROUP_DONORS_NAD_OR_NADP_AS_ACCEPTOR	34	Up	0.720694
GO_MF_DR_RIBONUCLEASE_ACTIVITY	6	Down	0.720747
GO_BP_DR_PROTEIN_DEACETYLATION	8	Up	0.72414
GO_BP_DR_NUCLEOSIDE_METABOLIC_PROCESS	10	Down	0.726639
GO_MF_DR_UNFOLDED_PROTEIN_BINDING	56	Up	0.72705
GO_CC_DR_NUCLEAR_SPECK	8	Up	0.7281
GO_BP_DR_MICROTUBULE_CYTOSKELETON_ORGANIZATION	10	Down	0.72812
GO_BP_DR_ANION_TRANSPORT	12	Up	0.728344
GO_MF_DR_HEAT_SHOCK_PROTEIN_BINDING	43	Up	0.72852
GO_MF_DR_MANGANESE_ION_BINDING	9	Up	0.730866
GO_CC_DR_RESPIRATORY_CHAIN	10	Down	0.731665
GO_BP_DR_CELL-MATRIX_ADHESION	11	Up	0.732171
GO_BP_DR_DIGESTIVE_TRACT_DEVELOPMENT	14	Up	0.73617
GO_MF_DR_PROTEIN_SERINE_THREONINE_PHOSPHATASE_ACTIVITY	15	Down	0.737124
GO_BP_DR_TRANSCRIPTION_INITIATION_FROM_RNA_POLYMERASE_II_PROMOTER	9	Up	0.737827
GO_BP_DR_IONOTROPIC_GLUTAMATE_RECEPTOR_SIGNALING_PATHWAY	8	Up	0.74104
GO_MF_DR_COENZYME_BINDING	30	Down	0.741956
GO_MF_DR_MAGNESIUM_ION_TRANSMEMBRANE_TRANSPORTER_ACTIVITY	6	Down	0.743575
GO_BP_DR_EPITHELIAL_TO_MESENCHYMAL_TRANSITION	6	Down	0.745275
GO_BP_DR_OXIDATION-REDUCTION_PROCESS	337	Down	0.746998
GO_BP_DR_PIGMENTATION	6	Down	0.750259
GO_BP_DR_DNA_TOPOLOGICAL_CHANGE	11	Up	0.75062
GO_BP_DR_DETERMINATION_LEFT_RIGHT_SYMMETRY	35	Down	0.751601
GO_MF_DR_PROTEIN_DISULFIDE_OXIDOREDUCTASE_ACTIVITY	13	Down	0.752346
GO_BP_DR_LIPID_BIOSYNTHETIC_PROCESS	9	Down	0.753028
GO_BP_DR_CYTOKINE-MEDIATED_SIGNALING_PATHWAY	6	Down	0.753389
GO_BP_DR_BLOOD_VESSEL_MORPHOGENESIS	12	Up	0.7534
GO_MF_DR_HYDROLASE_ACTIVITY_ACTING_ON_CARBON-NITROGEN_BUT_NOT_PEPTIDE_BONDS_IN_LINEAR_AMIDES	9	Down	0.754233
GO_BP_DR_TRICARBOXYLIC_ACID_CYCLE	15	Down	0.755015
GO_MF_DR_TRANSMEMBRANE_TRANSPORTER_ACTIVITY	15	Up	0.75558
GO_MF_DR_INTRAMOLECULAR_TRANSFERASE_ACTIVITY_PHOSPHOTRANSFERASES	6	Up	0.75633
GO_MF_DR_CALCIUM-DEPENDENT_CYSTEINE-TYPE_ENDOPEPTIDASE_ACTIVITY	8	Up	0.756927
GO_MF_DR_MANNOSYL-OLIGOSACCHARIDE_12-ALPHA-MANNOSIDASE_ACTIVITY	7	Up	0.757313
GO_MF_DR_SELENIUM_BINDING	9	Up	0.758694
GO_MF_DR_PHOSPHATASE_ACTIVITY	78	Down	0.767402
GO_MF_DR_ATPASE_ACTIVITY_COUPLED_TO_TRANSMEMBRANE_MOVEMENT_IONS_PHOSPHORYLATIVE_MECHANISM	26	Up	0.768571
GO_BP_DR_RESPIRATORY_ELECTRON_TRANSPORT_CHAIN	6	Down	0.771018
GO_BP_DR_PROTEIN_KINASE_C-ACTIVATING_G-PROTEIN_COUPLED_RECEPTOR_SIGNALING_PATHWAY	9	Down	0.771657
GO_MF_DR_DIACYLGLYCEROL_KINASE_ACTIVITY	9	Down	0.771657
GO_BP_DR_HEART_LOOPING	29	Up	0.772659
GO_MF_DR_IRON-SULFUR_CLUSTER_BINDING	29	Up	0.772795
GO_BP_DR_SIGNAL_TRANSDUCTION	382	Down	0.777526
GO_CC_DR_MITOCHONDRIAL_INNER_MEMBRANE	48	Up	0.779234
GO_BP_DR_TRNA_METHYLATION	7	Down	0.779369
GO_BP_DR_AUTOPHAGY	12	Up	0.780884
GO_MF_DR_HYDROLASE_ACTIVITY_ACTING_ON_ESTER_BONDS	29	Up	0.782586
GO_BP_DR_NERVOUS_SYSTEM_DEVELOPMENT	20	Down	0.783776
GO_MF_DR_HYDROLASE_ACTIVITY_ACTING_ON_GLYCOSYL_BONDS	12	Down	0.784425
GO_MF_DR_OXIDOREDUCTASE_PAIRED_DONORS_MOLECULAR_OXYGEN	25	Up	0.786963
GO_CC_DR_ACTIN_CYTOSKELETON	16	Down	0.786993
GO_CC_DR_SYNAPSE	14	Down	0.796635
GO_BP_DR_PROTEIN_LOCALIZATION	6	Down	0.798727
GO_MF_DR_RNA_BINDING	228	Down	0.799746
GO_CC_DR_OUTER_MEMBRANE-BOUNDED_PERIPLASMIC_SPACE	9	Up	0.800512
GO_MF_DR_IONOTROPIC_GLUTAMATE_RECEPTOR_ACTIVITY	9	Up	0.800512
GO_MF_DR_EXTRACELLULAR-GLUTAMATE-GATED_ION_CHANNEL_ACTIVITY	9	Up	0.800512
GO_BP_DR_PROTEOLYSIS	206	Down	0.803778
GO_MF_DR_CYTOCHROME-C_OXIDASE_ACTIVITY	13	Up	0.804549
GO_BP_DR_ATP_METABOLIC_PROCESS	8	Up	0.806571
GO_BP_DR_BIOSYNTHETIC_PROCESS	46	Down	0.807624
GO_BP_DR_CHROMOSOME_CONDENSATION	7	Down	0.808728
GO_BP_DR_RESPONSE_TO_DNA_DAMAGE_STIMULUS	33	Up	0.809318
GO_BP_DR_CYCLIC_NUCLEOTIDE_BIOSYNTHETIC_PROCESS	14	Up	0.810314
GO_MF_DR_PHOSPHORUS-OXYGEN_LYASE_ACTIVITY	14	Up	0.810314
GO_BP_DR_NUCLEOTIDE-EXCISION_REPAIR	15	Up	0.81161
GO_BP_DR_SOMITOGENESIS	32	Up	0.814042
GO_BP_DR_HEMOPOIESIS	22	Down	0.814499
GO_CC_DR_MICROTUBULE_BASAL_BODY	7	Up	0.814657
GO_BP_DR_SPERMATOGENESIS	8	Down	0.817386
GO_BP_DR_INTEGRIN-MEDIATED_SIGNALING_PATHWAY	19	Down	0.818378
GO_BP_DR_HEART_CONTRACTION	12	Up	0.81959
GO_BP_DR_AXON_EXTENSION_DEVELOPMENT	7	Up	0.822133
GO_MF_DR_3-HYDROXYACYL-COA_DEHYDROGENASE_ACTIVITY	6	Down	0.822761
GO_MF_DR_AMINOACYL-TRNA_EDITING_ACTIVITY	7	Down	0.823564
GO_MF_DR_TRANSCRIPTION_REGULATORY_REGION_DNA_BINDING	10	Down	0.82473
GO_MF_DR_TRANSFERASE_ACTIVITY_TRANSFERRING_HEXOSYL_GROUPS	25	Down	0.826388
GO_MF_DR_CATION_BINDING	26	Up	0.826827
GO_MF_DR_DNA-DIRECTED_RNA_POLYMERASE_ACTIVITY	23	Down	0.827133
GO_BP_DR_AXON_EXTENSION	6	Down	0.827596
GO_BP_DR_NEGATIVE_REGULATION_PROLIFERATION	6	Down	0.827875
GO_BP_DR_GPI_ANCHOR_BIOSYNTHETIC_PROCESS	11	Down	0.828914
GO_BP_DR_PROTEIN_CATABOLIC_PROCESS	19	Down	0.836045
GO_BP_DR_REGULATION_NEURON_APOPTOTIC_PROCESS	6	Down	0.836427
GO_MF_DR_PHOSPHOGLUCONATE_DEHYDROGENASE_DECARBOXYLATING_ACTIVITY	6	Down	0.837453
GO_BP_DR_ACTIN_CYTOSKELETON_ORGANIZATION	22	Up	0.837561
GO_BP_DR_DEPHOSPHORYLATION	105	Down	0.837954
GO_CC_DR_CYTOPLASMIC_MRNA_PROCESSING_BODY	6	Down	0.83835
GO_MF_DR_HISTONE_ACETYLTRANSFERASE_ACTIVITY	7	Down	0.839737
GO_BP_DR_HISTONE_ACETYLATION	7	Down	0.839737
GO_CC_DR_INTERMEDIATE_FILAMENT	11	Down	0.842001
GO_BP_DR_SPROUTING_ANGIOGENESIS	16	Up	0.843788
GO_BP_DR_MAGNESIUM_ION_TRANSPORT	7	Down	0.844444
GO_BP_DR_POSITIVE_REGULATION_GTPASE_ACTIVITY	35	Down	0.845028
GO_CC_DR_POSTSYNAPTIC_MEMBRANE	13	Down	0.846132
GO_MF_DR_TRANSCRIPTION_COACTIVATOR_ACTIVITY	16	Down	0.846544
GO_MF_DR_TRANSFERASE_ACTIVITY_TRANSFERRING_ACYL_GROUPS_OTHER_THAN_AMINO-ACYL_GROUPS	30	Up	0.848259
GO_MF_DR_PEROXIREDOXIN_ACTIVITY	6	Down	0.852675
GO_BP_DR_NUCLEAR_MRNA_SPLICING_VIA_SPLICEOSOME	10	Up	0.858882
GO_BP_DR_EPHRIN_RECEPTOR_SIGNALING_PATHWAY	11	Down	0.861571
GO_MF_DR_LIGASE_ACTIVITY	93	Down	0.8626
GO_BP_DR_CELL-SIGNALING	6	Up	0.863374
GO_BP_DR_VESICLE-MEDIATED_TRANSPORT	94	Down	0.865442
GO_MF_DR_FOUR-WAY_JUNCTION_HELICASE_ACTIVITY	15	Down	0.86567
GO_BP_DR_WNT_RECEPTOR_SIGNALING_PATHWAY	31	Down	0.866364
GO_CC_DR_ENDOSOME_MEMBRANE	6	Up	0.866538
GO_BP_DR_CELLULAR_AMINO_ACID_METABOLIC_PROCESS	19	Up	0.870371
GO_MF_DR_OXIDOREDUCTASE_ACTIVITY_ACTING_ON_THE_CH-CH_GROUP_DONORS	19	Down	0.87141
GO_CC_DR_INTEGRAL_TO_GOLGI_MEMBRANE	14	Down	0.878536
GO_BP_DR_TAIL_MORPHOGENESIS	6	Up	0.879007
GO_CC_DR_NUCLEAR_PORE	11	Down	0.883479
GO_BP_DR_NEURAL_CREST_DEVELOPMENT	10	Down	0.88847
GO_MF_DR_NAD_BINDING2	28	Down	0.888553
GO_BP_DR_DNA-DEPENDENT_TRANSCRIPTION_INITIATION	13	Down	0.889188
GO_BP_DR_EYE_PHOTORECEPTOR_DEVELOPMENT	9	Down	0.889237
GO_MF_DR_PEPTIDYL-PROLYL_CIS-TRANS_ISOMERASE_ACTIVITY	22	Down	0.890368
GO_BP_DR_PECTORAL_FIN_DEVELOPMENT	8	Down	0.893164
GO_BP_DR_TISSUE_DEVELOPMENT	10	Up	0.893484
GO_BP_DR_ATP_HYDROLYSIS_COUPLED_PROTON_TRANSPORT	19	Up	0.893557
GO_MF_DR_METAL_ION_BINDING	641	Down	0.898258
GO_MF_DR_SERINE-TYPE_ENDOPEPTIDASE_ACTIVITY	26	Down	0.901688
GO_CC_DR_SEPTIN_COMPLEX	8	Up	0.903601
GO_CC_DR_MEDIATOR_COMPLEX	16	Up	0.904737
GO_BP_DR_PANCREAS_DEVELOPMENT	14	Up	0.905332
GO_BP_DR_CELLULAR_PROTEIN_MODIFICATION_PROCESS	55	Down	0.905499
GO_BP_DR_DORSAL_VENTRAL_PATTERN_FORMATION	34	Down	0.906142
GO_BP_DR_BRAIN_MORPHOGENESIS	6	Up	0.908917
GO_BP_DR_MORPHOGENESIS	20	Up	0.909948
GO_MF_DR_TRANSITION_METAL_ION_BINDING	10	Up	0.910089
GO_CC_DR_MITOCHONDRIAL_MATRIX	9	Up	0.912184
GO_MF_DR_TRANSCRIPTION_FACTOR_BINDING	27	Up	0.919155
GO_MF_DR_OXIDOREDUCTASE_ACTIVITY	252	Down	0.919866
GO_BP_DR_PHOSPHATIDYLINOSITOL_PHOSPHORYLATION	21	Up	0.920723
GO_BP_DR_EMBRYONIC_PATTERN_SPECIFICATION	8	Up	0.922458
GO_MF_DR_RNA_POLYMERASE_II_TRANSCRIPTION_COFACTOR_ACTIVITY	15	Up	0.923486
GO_CC_DR_MITOCHONDRIAL_PROTON-TRANSPORTING_ATP_SYNTHASE_COMPLEX_COUPLING_FACTOR_FO	7	Down	0.924229
GO_BP_DR_DNA_RECOMBINATION	32	Up	0.925305
GO_BP_DR_REGULATION_ACTIN_FILAMENT_POLYMERIZATION	7	Down	0.927504
GO_MF_DR_PROTEIN_TYROSINE_SERINE_THREONINE_PHOSPHATASE_ACTIVITY	28	Down	0.93051
GO_MF_DR_SEQUENCE-SPECIFIC_DNA_BINDING_TRANSCRIPTION_FACTOR_ACTIVITY	255	Up	0.931485
GO_MF_DR_MOTOR_ACTIVITY	33	Down	0.932792
GO_MF_DR_CATALYTIC_ACTIVITY	420	Down	0.933938
GO_MF_DR_HYDROLASE_ACTIVITY_HYDROLYZING_O-GLYCOSYL_COMPOUNDS	28	Down	0.940797
GO_MF_DR_NON-MEMBRANE_SPANNING_PROTEIN_TYROSINE_KINASE_ACTIVITY	8	Up	0.945031
GO_CC_DR_CYTOSOL	49	Down	0.946646
GO_BP_DR_CENTRAL_NERVOUS_SYSTEM_MORPHOGENESIS	6	Down	0.948463
GO_BP_DR_PROTEIN_DEPHOSPHORYLATION	73	Down	0.94907
GO_BP_DR_ATP_BIOSYNTHETIC_PROCESS	17	Down	0.949925
GO_MF_DR_EPHRIN_RECEPTOR_ACTIVITY	10	Up	0.953872
GO_BP_DR_CARTILAGE_MORPHOGENESIS	7	Up	0.954736
GO_MF_DR_L-ASCORBIC_ACID_BINDING	7	Down	0.95511
GO_CC_DR_LYSOSOME	17	Up	0.955822
GO_CC_DR_INTEGRIN_COMPLEX	13	Up	0.955939
GO_BP_DR_POSITIVE_REGULATION_PROLIFERATION	7	Up	0.957617
GO_BP_DR_MICROTUBULE-BASED_PROCESS	17	Down	0.962532
GO_BP_DR_ENDOCYTOSIS	10	Down	0.963111
GO_CC_DR_NUCLEAR_ENVELOPE	8	Down	0.970436
GO_MF_DR_INORGANIC_ANION_EXCHANGER_ACTIVITY	6	Up	0.970606
GO_MF_DR_ANION_TRANSMEMBRANE_TRANSPORTER_ACTIVITY	6	Up	0.970606
GO_BP_DR_GLYCEROL_ETHER_METABOLIC_PROCESS	7	Down	0.972372
GO_MF_DR_PHOSPHOPROTEIN_PHOSPHATASE_ACTIVITY	58	Down	0.97619
GO_MF_DR_METALLOENDOPEPTIDASE_ACTIVITY	49	Down	0.978814
GO_BP_DR_NEURAL_TUBE_FORMATION	6	Down	0.978846
GO_MF_DR_TRANSAMINASE_ACTIVITY	10	Down	0.982726
GO_CC_DR_MYOSIN_COMPLEX	32	Down	0.985973
GO_BP_DR_CARBOHYDRATE_TRANSPORT	11	Down	0.988441
GO_MF_DR_SIALYLTRANSFERASE_ACTIVITY	10	Down	0.988502
GO_MF_DR_OXIDOREDUCTASE_ACTIVITY_ACTING_ON_THE_ALDEHYDE_OR_OXO_GROUP_DONORS_NAD_OR_NADP_AS_ACCEPTOR	14	Down	0.991295
GO_BP_DR_NEUROGENESIS	7	Up	0.993104
GO_MF_DR_PROTON-TRANSPORTING_ATPASE_ACTIVITY_ROTATIONAL_MECHANISM	10	Up	0.994823
GO_BP_DR_BLOOD_VESSEL_DEVELOPMENT	13	Up	0.995308
GO_BP_DR_REGULATION_PROLIFERATION	6	Down	0.995814
GO_MF_DR_ELECTRON_CARRIER_ACTIVITY	53	Down	0.996235
GO_BP_DR_PROTEIN_UBIQUITINATION	54	Up	0.997625
GO_BP_DR_ONE-CARBON_METABOLIC_PROCESS	10	Down	0.997889
GO_CC_DR_MITOCHONDRIAL_MEMBRANE	10	Down	0.998538
GO_BP_DR_DETERMINATION_VENTRAL_IDENTITY	10	Down	0.99977
